# Supplementary material for: Disease Progression and Phasic Changes in Gene Expression in a Mouse Model of Osteoarthritis
Source: PLoS One. 2013 Jan 28;8(1):e54633. doi: 10.1371/journal.pone.0054633 (PMC3557277; doi:10.1371/journal.pone.0054633)
Supplement: File S1 — Excel file of 406 Sham filtered probe sets and DAVID results. Results are presented as signal log ratio (SLR) which is the log2 of the fold change and so an SLR of 0.5 = 1.4-fold. A positive number would be up-regulation and negative number down-regulation. (XLSX) [file pone.0054633.s003.xlsx]

## Sheet: 406 Gene Details
Probe Set	Gene Symbol	Gene Title	Gene Ontology Biological Process	Gene Ontology Cellular Component	Gene Ontology Molecular Function	Pathway	Target Description	2wk SLR Sham rep1	2wk SLR Sham rep2	2wk SLR Sham rep3	4wk SLR Sham rep1	4wk SLR Sham rep2	4wk SLR Sham rep3	8wk SLR Sham rep1	8wk SLR Sham rep2	8wk SLR Sham rep3	16wk SLR Sham rep1	16wk SLR Sham rep2	16wk SLR Sham rep3
1415800_at	Gja1	gap junction protein, alpha 1	0001701 // in utero embryonic development // inferred from mutant phenotype /// 0001764 // neuron migration // inferred from mutant phenotype /// 0001947 // heart looping // inferred from mutant phenotype /// 0002070 // epithelial cell maturation // inferred from mutant phenotype /// 0006915 // apoptosis // inferred from electronic annotation /// 0007154 // cell communication // inferred from ele…	0005737 // cytoplasm // inferred from electronic annotation /// 0005741 // mitochondrial outer membrane // inferred from electronic annotation /// 0005764 // lysosome // inferred from electronic annotation /// 0005769 // early endosome // inferred from electronic annotation /// 0005771 // multivesicular body // inferred from electronic annotation /// 0005783 // endoplasmic reticulum // inferred f…	0005102 // receptor binding // inferred from physical interaction /// 0005243 // gap junction channel activity // inferred from direct assay /// 0005243 // gap junction channel activity // inferred from electronic annotation /// 0005515 // protein binding // inferred from physical interaction /// 0017124 // SH3 domain binding // inferred from electronic annotation /// 0022857 // transmembrane tra…	Calcium_regulation_in_cardiac_cells // GenMAPP /// Smooth_muscle_contraction // GenMAPP	gb:BC006894.1 /DB_XREF=gi:13905195 /FEA=FLmRNA /CNT=381 /TID=Mm.4504.1 /TIER=FL+Stack /STK=260 /UG=Mm.4504 /LL=14609 /UG_GENE=Gja1 /DEF=Mus musculus, gap junction membrane channel protein alpha 1, clone MGC:11552 IMAGE:3599347, mRNA, complete cds. /PROD=gap junction membrane channel protein alpha 1 /FL=gb:M63801.1 gb:NM_010288.1 gb:BC006894.1	-0.056618	0.47828	0.67548	-0.12805	-0.334	-0.41871	-0.64141	-0.36666	-0.089758	-1.007	-0.59781	-0.93592
1415801_at	Gja1	gap junction protein, alpha 1	0001701 // in utero embryonic development // inferred from mutant phenotype /// 0001764 // neuron migration // inferred from mutant phenotype /// 0001947 // heart looping // inferred from mutant phenotype /// 0002070 // epithelial cell maturation // inferred from mutant phenotype /// 0006915 // apoptosis // inferred from electronic annotation /// 0007154 // cell communication // inferred from ele…	0005737 // cytoplasm // inferred from electronic annotation /// 0005741 // mitochondrial outer membrane // inferred from electronic annotation /// 0005764 // lysosome // inferred from electronic annotation /// 0005769 // early endosome // inferred from electronic annotation /// 0005771 // multivesicular body // inferred from electronic annotation /// 0005783 // endoplasmic reticulum // inferred f…	0005102 // receptor binding // inferred from physical interaction /// 0005243 // gap junction channel activity // inferred from direct assay /// 0005243 // gap junction channel activity // inferred from electronic annotation /// 0005515 // protein binding // inferred from physical interaction /// 0017124 // SH3 domain binding // inferred from electronic annotation /// 0022857 // transmembrane tra…	Calcium_regulation_in_cardiac_cells // GenMAPP /// Smooth_muscle_contraction // GenMAPP	gb:M63801.1 /DB_XREF=gi:191773 /GEN=alpha-1 gap junction /FEA=FLmRNA /CNT=381 /TID=Mm.4504.1 /TIER=FL /STK=2 /UG=Mm.4504 /LL=14609 /DEF=Mus musculus connexin 43 (alpha-1 gap junction) mRNA, complete cds. /PROD=connexin 43 /FL=gb:M63801.1 gb:NM_010288.1 gb:BC006894.1	-0.13566	0.078344	-0.038276	-0.40038	-0.33821	-0.19137	-0.42242	-0.69675	-0.5236	-0.67322	-0.44086	-0.55421
1415894_at	Enpp2	ectonucleotide pyrophosphatase/phosphodiesterase 2	0006935 // chemotaxis // inferred from electronic annotation /// 0006955 // immune response // inferred from electronic annotation /// 0008152 // metabolic process // inferred from electronic annotation /// 0016042 // lipid catabolic process // inferred from electronic annotation	0005576 // extracellular region // inferred from electronic annotation /// 0005887 // integral to plasma membrane // inferred from sequence or structural similarity	0003676 // nucleic acid binding // inferred from electronic annotation /// 0003824 // catalytic activity // inferred from electronic annotation /// 0004528 // phosphodiesterase I activity // inferred from sequence or structural similarity /// 0004551 // nucleotide diphosphatase activity // inferred from sequence or structural similarity /// 0005044 // scavenger receptor activity // inferred from …	---	gb:AW125230 /DB_XREF=gi:6100760 /DB_XREF=UI-M-BH2.1-aps-d-09-0-UI.s1 /CLONE=UI-M-BH2.1-aps-d-09-0-UI /FEA=FLmRNA /CNT=373 /TID=Mm.28107.1 /TIER=ConsEnd /STK=1 /UG=Mm.28107 /LL=18606 /UG_GENE=Enpp2 /UG_TITLE=ectonucleotide pyrophosphatasephosphodiesterase 2 /FL=gb:BC003264.1 gb:AF123542.1 gb:NM_015744.1	-0.16378	0.18565	0.41372	-0.13458	-0.25165	-0.14304	-0.54859	-0.2401	-0.30093	-0.95344	-0.56545	-0.75973
1415923_at	Ndn	necdin	0001558 // regulation of cell growth // traceable author statement /// 0001764 // neuron migration // inferred from mutant phenotype /// 0006350 // transcription // inferred from electronic annotation /// 0006355 // regulation of transcription, DNA-dependent // inferred from genetic interaction /// 0006874 // cellular calcium ion homeostasis // traceable author statement /// 0007409 // axonogenes…	0005634 // nucleus // inferred from direct assay /// 0005634 // nucleus // inferred from electronic annotation /// 0005654 // nucleoplasm // inferred from electronic annotation /// 0005737 // cytoplasm // inferred from direct assay /// 0005737 // cytoplasm // inferred from electronic annotation /// 0005813 // centrosome // inferred from direct assay /// 0016363 // nuclear matrix // inferred from …	0003677 // DNA binding // inferred from electronic annotation /// 0005102 // receptor binding // inferred from electronic annotation /// 0005515 // protein binding // inferred from physical interaction /// 0005515 // protein binding // inferred from electronic annotation /// 0008022 // protein C-terminus binding // inferred from electronic annotation /// 0042803 // protein homodimerization activi…	---	gb:NM_010882.1 /DB_XREF=gi:6754805 /GEN=Ndn /FEA=FLmRNA /CNT=258 /TID=Mm.7089.1 /TIER=FL+Stack /STK=168 /UG=Mm.7089 /LL=17984 /DEF=Mus musculus necdin (Ndn), mRNA. /PROD=necdin /FL=gb:NM_010882.1 gb:M80840.1 gb:BC015268.1	-0.078783	0.36225	0.4248	-0.45645	-0.80569	-0.28531	-0.66806	-0.39162	-0.56202	-1.2984	-0.85596	-1.1503
1415936_at	Bcar3	breast cancer anti-estrogen resistance 3	0007264 // small GTPase mediated signal transduction // inferred from electronic annotation	0005622 // intracellular // inferred from electronic annotation	0005085 // guanyl-nucleotide exchange factor activity // inferred from electronic annotation /// 0005515 // protein binding // inferred from electronic annotation	---	gb:NM_013867.1 /DB_XREF=gi:7304924 /GEN=Bcar3 /FEA=FLmRNA /CNT=187 /TID=Mm.45815.1 /TIER=FL+Stack /STK=165 /UG=Mm.45815 /LL=29815 /DEF=Mus musculus breast cancer anti-estrogen resistance 3 (Bcar3), mRNA. /PROD=breast cancer anti-estrogen resistance 3 /FL=gb:AF179566.1 gb:NM_013867.1	-0.28643	-0.12231	0.29816	-0.29184	-0.3106	-0.27273	-0.60141	-0.45624	-0.23177	-0.61826	-0.66792	-0.73745
1415943_at	Sdc1	syndecan 1	0001822 // kidney development // inferred from electronic annotation /// 0009636 // response to toxin // inferred from electronic annotation /// 0042060 // wound healing // inferred from electronic annotation /// 0042476 // odontogenesis // inferred from electronic annotation /// 0042542 // response to hydrogen peroxide // inferred from electronic annotation /// 0048627 // myoblast development //…	0001931 // uropod // inferred from electronic annotation /// 0005737 // cytoplasm // inferred from electronic annotation /// 0005925 // focal adhesion // inferred from electronic annotation /// 0009986 // cell surface // inferred from direct assay /// 0016020 // membrane // inferred from electronic annotation /// 0016021 // integral to membrane // inferred from electronic annotation /// 0043234 /…	0008022 // protein C-terminus binding // inferred from electronic annotation /// 0008092 // cytoskeletal protein binding // inferred from electronic annotation	---	gb:BC010560.1 /DB_XREF=gi:14714818 /FEA=FLmRNA /CNT=374 /TID=Mm.2580.1 /TIER=FL+Stack /STK=163 /UG=Mm.2580 /LL=20969 /UG_GENE=Sdc1 /DEF=Mus musculus, syndecan 1, clone MGC:5879 IMAGE:3501359, mRNA, complete cds. /PROD=syndecan 1 /FL=gb:BC010560.1 gb:NM_011519.1	0.09239	0.68553	0.75435	-0.17612	-0.28304	0.037857	-0.37443	-0.32054	-0.50638	-0.68124	-0.50574	-0.36081
1415949_at	Cpe /// LOC100046434	carboxypeptidase E /// similar to carboxypeptidase E	0006508 // proteolysis // inferred from electronic annotation /// 0030070 // insulin processing // inferred from mutant phenotype	0005576 // extracellular region // inferred from electronic annotation	0004180 // carboxypeptidase activity // inferred from mutant phenotype /// 0004180 // carboxypeptidase activity // inferred from electronic annotation /// 0004181 // metallocarboxypeptidase activity // inferred from electronic annotation /// 0008233 // peptidase activity // inferred from electronic annotation /// 0008237 // metallopeptidase activity // inferred from electronic annotation /// 0008…	---	gb:BC010197.1 /DB_XREF=gi:16307317 /FEA=FLmRNA /CNT=333 /TID=Mm.31395.1 /TIER=FL+Stack /STK=161 /UG=Mm.31395 /LL=12876 /UG_GENE=Cpe /DEF=Mus musculus, Carboxypeptidase E, clone MGC:7101 IMAGE:3157558, mRNA, complete cds. /PROD=Carboxypeptidase E /FL=gb:NM_013494.1 gb:U23184.1 gb:BC010197.1	-0.13511	-0.19233	0.49127	-0.078315	-0.36158	-0.41526	-0.4991	-0.2455	-0.31389	-1.0553	-0.67946	-1.0155
1415964_at	Scd1	stearoyl-Coenzyme A desaturase 1	0006629 // lipid metabolic process // inferred from electronic annotation /// 0006633 // fatty acid biosynthetic process // inferred from mutant phenotype /// 0006633 // fatty acid biosynthetic process // inferred from electronic annotation /// 0008610 // lipid biosynthetic process // inferred from electronic annotation /// 0050872 // white fat cell differentiation // inferred from direct assay /…	0005783 // endoplasmic reticulum // inferred from electronic annotation /// 0016020 // membrane // inferred from electronic annotation /// 0016021 // integral to membrane // inferred from electronic annotation	0004768 // stearoyl-CoA 9-desaturase activity // inferred from electronic annotation /// 0005506 // iron ion binding // inferred from electronic annotation /// 0016491 // oxidoreductase activity // inferred from electronic annotation /// 0016717 // oxidoreductase activity, acting on paired donors, with oxidation of a pair of donors resulting in the reduction of molecular oxygen to two molecules o…	Fatty_Acid_Synthesis // GenMAPP	gb:BC007474.1 /DB_XREF=gi:13938634 /FEA=FLmRNA /CNT=521 /TID=Mm.140785.1 /TIER=FL+Stack /STK=156 /UG=Mm.140785 /LL=20249 /UG_GENE=Scd1 /DEF=Mus musculus, stearoyl-Coenzyme A desaturase 1, clone MGC:6427 IMAGE:3599932, mRNA, complete cds. /PROD=stearoyl-Coenzyme A desaturase 1 /FL=gb:BC007474.1 gb:NM_009127.1	-0.41579	-0.49448	-0.30001	-0.19625	-0.2631	-0.43736	-0.12576	-0.74808	-0.6125	-0.69342	-0.80309	-1.3284
1415988_at	Hdlbp	high density lipoprotein (HDL) binding protein	0006629 // lipid metabolic process // inferred from electronic annotation /// 0006810 // transport // inferred from electronic annotation /// 0006869 // lipid transport // inferred from electronic annotation /// 0008202 // steroid metabolic process // inferred from electronic annotation /// 0008203 // cholesterol metabolic process // inferred from electronic annotation	0005634 // nucleus // inferred from electronic annotation /// 0005737 // cytoplasm // inferred from electronic annotation /// 0034364 // high-density lipoprotein particle // inferred from electronic annotation	0003723 // RNA binding // inferred from electronic annotation /// 0005515 // protein binding // inferred from electronic annotation	---	gb:BG065877 /DB_XREF=gi:12548440 /DB_XREF=H3036C12-3 /CLONE=H3036C12 /FEA=FLmRNA /CNT=498 /TID=Mm.30012.1 /TIER=Stack /STK=28 /UG=Mm.30012 /LL=98244 /UG_GENE=AA960365 /UG_TITLE=expressed sequence AA960365 /FL=gb:BC021765.1 gb:NM_133808.1 gb:BC025648.1	-0.22032	0.028425	0.31939	-0.5003	-0.5876	-0.26325	-0.5817	-0.69871	-0.66476	-0.69457	-0.59491	-0.81328
1416039_x_at	Cyr61	cysteine rich protein 61	0001558 // regulation of cell growth // inferred from electronic annotation /// 0002041 // intussusceptive angiogenesis // inferred from mutant phenotype /// 0006935 // chemotaxis // inferred from electronic annotation /// 0007155 // cell adhesion // inferred from electronic annotation /// 0010811 // positive regulation of cell-substrate adhesion // inferred from direct assay /// 0030198 // extra…	0005576 // extracellular region // inferred from electronic annotation	0005515 // protein binding // inferred from electronic annotation /// 0005520 // insulin-like growth factor binding // inferred from electronic annotation /// 0008201 // heparin binding // inferred from electronic annotation /// 0019838 // growth factor binding // inferred from electronic annotation /// 0050840 // extracellular matrix binding // inferred from direct assay	---	gb:NM_010516.1 /DB_XREF=gi:6753593 /GEN=Cyr61 /FEA=FLmRNA /CNT=204 /TID=Mm.1231.1 /TIER=FL+Stack /STK=140 /UG=Mm.1231 /LL=16007 /DEF=Mus musculus cysteine rich protein 61 (Cyr61), mRNA. /PROD=cysteine rich protein 61 /FL=gb:M32490.1 gb:NM_010516.1	0.11778	0.23238	0.29784	0.16295	-0.33865	-0.089989	-0.44099	-0.26242	-0.37665	-0.65071	-0.6703	-0.58471
1416174_at	Rbbp9	retinoblastoma binding protein 9	0042127 // regulation of cell proliferation // inferred from electronic annotation	0005634 // nucleus // inferred from electronic annotation /// 0005737 // cytoplasm // inferred from electronic annotation	0005515 // protein binding // inferred from electronic annotation /// 0016787 // hydrolase activity // inferred from electronic annotation	---	gb:BC011107.1 /DB_XREF=gi:15029773 /FEA=FLmRNA /CNT=163 /TID=Mm.24216.1 /TIER=FL+Stack /STK=119 /UG=Mm.24216 /LL=26450 /UG_GENE=Rbbp9 /DEF=Mus musculus, Similar to retinoblastoma-binding protein 9, clone MGC:19260 IMAGE:3982875, mRNA, complete cds. /PROD=Similar to retinoblastoma-binding protein 9 /FL=gb:NM_015754.1 gb:AF039563.1 gb:BC011107.1	-0.17604	0.14077	0.39598	-0.20647	-0.49037	-0.053832	-0.51963	-0.06056	-0.18099	-0.74993	-0.50155	-0.76377
1416221_at	Fstl1	follistatin-like 1	---	0005576 // extracellular region // inferred from electronic annotation	0005509 // calcium ion binding // inferred from electronic annotation /// 0008201 // heparin binding // inferred from electronic annotation	---	gb:NM_008047.1 /DB_XREF=gi:6679870 /GEN=Fstl /FEA=FLmRNA /CNT=393 /TID=Mm.22763.1 /TIER=FL+Stack /STK=111 /UG=Mm.22763 /LL=14314 /DEF=Mus musculus follistatin-like (Fstl), mRNA. /PROD=follistatin-like /FL=gb:M91380.1 gb:NM_008047.1	0.70014	1.6275	1.3139	0.48722	-0.13127	0.41825	-0.29062	-0.19589	-0.37159	-0.55216	-0.4398	-0.47887
1416321_s_at	Prelp	proline arginine-rich end leucine-rich repeat	0007569 // cell aging // inferred from direct assay	0005576 // extracellular region // inferred from electronic annotation /// 0005578 // proteinaceous extracellular matrix // inferred from electronic annotation	0005515 // protein binding // inferred from electronic annotation /// 0008201 // heparin binding // inferred from electronic annotation	---	gb:BC019775.1 /DB_XREF=gi:18043602 /FEA=FLmRNA /CNT=156 /TID=Mm.214514.1 /TIER=FL+Stack /STK=98 /UG=Mm.214514 /LL=116847 /UG_GENE=Prelp /DEF=Mus musculus, proline arginine-rich end leucine-rich repeat, clone MGC:25825 IMAGE:4165772, mRNA, complete cds. /PROD=proline arginine-rich end leucine-rich repeat /FL=gb:BC019775.1 gb:NM_054077.1	-0.10234	0.1936	0.32197	-0.54598	-0.90659	-0.28203	-0.6606	-0.52341	-0.65043	-1.8342	-1.3186	-0.90413
1416342_at	Tnc	tenascin C	0007155 // cell adhesion // inferred from electronic annotation /// 0007165 // signal transduction // inferred from electronic annotation /// 0007528 // neuromuscular junction development // inferred from mutant phenotype /// 0009611 // response to wounding // inferred from electronic annotation /// 0060739 // mesenchymal-epithelial cell signaling involved in prostate gland development // inferre…	0005576 // extracellular region // inferred from direct assay /// 0005576 // extracellular region // inferred from electronic annotation /// 0005578 // proteinaceous extracellular matrix // inferred from electronic annotation /// 0005604 // basement membrane // inferred from direct assay	0001968 // fibronectin binding // not recorded /// 0005102 // receptor binding // inferred from electronic annotation /// 0005515 // protein binding // inferred from electronic annotation	---	gb:NM_011607.1 /DB_XREF=gi:7106434 /GEN=Tnc /FEA=FLmRNA /CNT=183 /TID=Mm.980.1 /TIER=FL+Stack /STK=96 /UG=Mm.980 /LL=21923 /DEF=Mus musculus tenascin C (Tnc), mRNA. /PROD=tenascin C /FL=gb:D90343.1 gb:NM_011607.1	-0.16593	0.28425	0.55192	-0.22387	-0.14641	-0.11726	-0.46351	-0.25087	-0.55252	-0.59587	-0.50939	-0.59874
1416405_at	Bgn	biglycan	0001974 // blood vessel remodeling // inferred from electronic annotation /// 0019800 // peptide cross-linking via chondroitin 4-sulfate glycosaminoglycan // inferred from direct assay	0005576 // extracellular region // inferred from electronic annotation /// 0005578 // proteinaceous extracellular matrix // inferred from electronic annotation /// 0009986 // cell surface // inferred from sequence or structural similarity /// 0009986 // cell surface // inferred from direct assay /// 0030133 // transport vesicle // inferred from electronic annotation /// 0031012 // extracellular m…	0005515 // protein binding // inferred from electronic annotation /// 0005539 // glycosaminoglycan binding // inferred from direct assay /// 0050840 // extracellular matrix binding // inferred from direct assay	---	gb:BC019502.1 /DB_XREF=gi:18044514 /FEA=FLmRNA /CNT=224 /TID=Mm.2608.1 /TIER=FL+Stack /STK=91 /UG=Mm.2608 /LL=12111 /UG_GENE=Bgn /DEF=Mus musculus, biglycan, clone MGC:28669 IMAGE:4237268, mRNA, complete cds. /PROD=biglycan /FL=gb:BC005452.1 gb:NM_007542.2 gb:L20276.1 gb:BC019502.1	0.046121	0.65088	0.818	-0.13288	-0.56186	-0.19642	-0.43965	-0.23474	-0.39763	-0.63811	-0.52675	-0.5003
1416473_a_at	Igdcc4	immunoglobulin superfamily, DCC subclass, member 4	---	0005886 // plasma membrane // inferred from electronic annotation /// 0005887 // integral to plasma membrane // not recorded /// 0016020 // membrane // inferred from electronic annotation /// 0016021 // integral to membrane // inferred from electronic annotation	---	---	gb:NM_020043.1 /DB_XREF=gi:9910463 /GEN=Nope /FEA=FLmRNA /CNT=107 /TID=Mm.143741.1 /TIER=FL+Stack /STK=87 /UG=Mm.143741 /LL=56741 /DEF=Mus musculus neighbor of Punc E11 (Nope), mRNA. /PROD=neighbor of Punc e11 protein /FL=gb:AF176694.1 gb:AB052621.1 gb:AB052620.1 gb:NM_020043.1	0.27398	0.49522	0.64396	-0.051241	-0.46778	-0.33623	-0.24063	-0.18792	-0.33337	-0.62696	-0.53084	-0.83048
1416474_at	Igdcc4	immunoglobulin superfamily, DCC subclass, member 4	---	0005886 // plasma membrane // inferred from electronic annotation /// 0005887 // integral to plasma membrane // not recorded /// 0016020 // membrane // inferred from electronic annotation /// 0016021 // integral to membrane // inferred from electronic annotation	---	---	gb:NM_020043.1 /DB_XREF=gi:9910463 /GEN=Nope /FEA=FLmRNA /CNT=107 /TID=Mm.143741.1 /TIER=FL+Stack /STK=87 /UG=Mm.143741 /LL=56741 /DEF=Mus musculus neighbor of Punc E11 (Nope), mRNA. /PROD=neighbor of Punc e11 protein /FL=gb:AF176694.1 gb:AB052621.1 gb:AB052620.1 gb:NM_020043.1	0.20207	0.52766	0.58102	-0.31346	-0.49702	-0.14958	-0.33897	-0.025418	-0.17816	-0.85837	-0.67734	-0.86276
1416589_at	Sparc	secreted acidic cysteine rich glycoprotein	0007165 // signal transduction // inferred from electronic annotation /// 0042127 // regulation of cell proliferation // inferred from genetic interaction	0005576 // extracellular region // inferred from electronic annotation /// 0005578 // proteinaceous extracellular matrix // inferred from electronic annotation /// 0005604 // basement membrane // inferred from electronic annotation /// 0031012 // extracellular matrix // inferred from direct assay	0005507 // copper ion binding // inferred from electronic annotation /// 0005509 // calcium ion binding // inferred from electronic annotation /// 0050840 // extracellular matrix binding // inferred from direct assay	---	gb:BC004638.1 /DB_XREF=gi:13435523 /FEA=FLmRNA /CNT=413 /TID=Mm.35439.1 /TIER=FL+Stack /STK=79 /UG=Mm.35439 /LL=20692 /UG_GENE=Sparc /DEF=Mus musculus, secreted acidic cysteine rich glycoprotein, clone MGC:6232 IMAGE:3586402, mRNA, complete cds. /PROD=secreted acidic cysteine rich glycoprotein /FL=gb:NM_009242.1 gb:BC004638.1	0.01524	0.29218	0.54666	-0.020089	-0.12574	0.13363	-0.29711	-0.31994	-0.18388	-0.70708	-0.51889	-0.57823
1416591_at	Rab34	RAB34, member of RAS oncogene family	0006810 // transport // inferred from electronic annotation /// 0006897 // endocytosis // inferred from direct assay /// 0007264 // small GTPase mediated signal transduction // inferred from electronic annotation /// 0015031 // protein transport // inferred from electronic annotation	0001726 // ruffle // inferred from direct assay /// 0005737 // cytoplasm // inferred from electronic annotation /// 0005769 // early endosome // inferred from direct assay /// 0005794 // Golgi apparatus // inferred from electronic annotation	0000166 // nucleotide binding // inferred from electronic annotation /// 0003924 // GTPase activity // inferred from direct assay /// 0005525 // GTP binding // inferred from electronic annotation /// 0019001 // guanyl nucleotide binding // inferred from direct assay	---	gb:AF327929.1 /DB_XREF=gi:12963386 /FEA=FLmRNA /CNT=193 /TID=Mm.28941.1 /TIER=FL+Stack /STK=79 /UG=Mm.28941 /LL=19376 /UG_GENE=Rab34 /DEF=Mus musculus small GTPase Rah mRNA, complete cds. /PROD=small GTPase Rah /FL=gb:AF322068.1 gb:NM_033475.1 gb:AF327929.1	-0.06003	0.47457	0.70878	-0.12484	-0.35982	-0.21352	-0.44971	-0.40836	-0.44018	-0.87056	-0.59979	-0.79306
1416623_at	Thbs3	thrombospondin 3	0007155 // cell adhesion // inferred from electronic annotation	0005576 // extracellular region // inferred from electronic annotation	0005198 // structural molecule activity // inferred from electronic annotation /// 0005509 // calcium ion binding // inferred from electronic annotation /// 0005515 // protein binding // inferred from electronic annotation	Inflammatory_Response_Pathway // GenMAPP	gb:NM_013691.1 /DB_XREF=gi:8567413 /GEN=Thbs3 /FEA=FLmRNA /CNT=90 /TID=Mm.2114.1 /TIER=FL+Stack /STK=78 /UG=Mm.2114 /LL=21827 /DEF=Mus musculus thrombospondin 3 (Thbs3), mRNA. /PROD=thrombospondin 3 /FL=gb:L04302.1 gb:L24434.1 gb:NM_013691.1	0.35547	1.1698	0.96416	-0.17317	-0.3723	0.080623	-0.5403	-0.51665	-0.59869	-1.0729	-1.0014	-0.69824
1416713_at	Tppp3	tubulin polymerization-promoting protein family member 3	0001578 // microtubule bundle formation // inferred from sequence or structural similarity	---	0015631 // tubulin binding // inferred from sequence or structural similarity	---	gb:NM_026481.1 /DB_XREF=gi:13385967 /GEN=2700055K07Rik /FEA=FLmRNA /CNT=115 /TID=Mm.29358.1 /TIER=FL+Stack /STK=72 /UG=Mm.29358 /LL=67971 /DEF=Mus musculus RIKEN cDNA 2700055K07 gene (2700055K07Rik), mRNA. /PROD=RIKEN cDNA 2700055K07 /FL=gb:NM_026481.1 gb:BC010788.1	0.39525	0.88866	0.6292	-0.035821	-0.14534	0.11626	-0.10738	-0.060971	-0.26823	-0.55932	-0.39591	-0.19811
1416808_at	Nid1	nidogen 1	0007155 // cell adhesion // inferred from electronic annotation /// 0007160 // cell-matrix adhesion // inferred from direct assay /// 0007160 // cell-matrix adhesion // inferred from electronic annotation /// 0008218 // bioluminescence // inferred from electronic annotation /// 0010811 // positive regulation of cell-substrate adhesion // inferred from direct assay /// 0018298 // protein-chromopho…	0005576 // extracellular region // inferred from electronic annotation /// 0005578 // proteinaceous extracellular matrix // inferred from direct assay /// 0005578 // proteinaceous extracellular matrix // inferred from electronic annotation /// 0005604 // basement membrane // inferred from direct assay /// 0005604 // basement membrane // inferred from physical interaction /// 0005604 // basement m…	0005509 // calcium ion binding // inferred from electronic annotation /// 0005515 // protein binding // inferred from physical interaction /// 0005515 // protein binding // inferred from electronic annotation /// 0050840 // extracellular matrix binding // inferred from direct assay	---	gb:NM_010917.1 /DB_XREF=gi:6754853 /GEN=Nid1 /FEA=FLmRNA /CNT=287 /TID=Mm.4691.1 /TIER=FL+Stack /STK=68 /UG=Mm.4691 /LL=18073 /DEF=Mus musculus nidogen 1 (Nid1), mRNA. /PROD=nidogen /FL=gb:NM_010917.1	0.37472	1.0067	1.0065	0.094683	-0.31493	0.13957	-0.41199	-0.11887	-0.3014	-0.63504	-0.44974	-0.73435
1416872_at	Tspan6	tetraspanin 6	0043123 // positive regulation of I-kappaB kinase/NF-kappaB cascade // inferred from electronic annotation	0016020 // membrane // inferred from electronic annotation /// 0016021 // integral to membrane // inferred from electronic annotation	0004871 // signal transducer activity // inferred from electronic annotation	---	gb:BC003733.1 /DB_XREF=gi:13277644 /FEA=FLmRNA /CNT=174 /TID=Mm.46701.1 /TIER=FL+Stack /STK=66 /UG=Mm.46701 /LL=56496 /UG_GENE=Tm4sf6 /DEF=Mus musculus, transmembrane 4 superfamily member 6, clone MGC:5801 IMAGE:3590862, mRNA, complete cds. /PROD=transmembrane 4 superfamily member 6 /FL=gb:BC003733.1 gb:AF053454.1 gb:NM_019656.1	-0.13899	0.36795	0.43671	-0.22745	-0.44262	-0.33186	-0.49816	-0.39111	-0.46354	-0.68598	-0.51366	-0.74142
1416939_at	Ppa1	pyrophosphatase (inorganic) 1	0006796 // phosphate metabolic process // inferred by curator /// 0006796 // phosphate metabolic process // inferred from electronic annotation	0005737 // cytoplasm // inferred from electronic annotation	0000287 // magnesium ion binding // inferred from electronic annotation /// 0004427 // inorganic diphosphatase activity // inferred from electronic annotation /// 0016462 // pyrophosphatase activity // inferred from direct assay /// 0016787 // hydrolase activity // inferred from electronic annotation /// 0046872 // metal ion binding // inferred from electronic annotation	---	gb:NM_026438.1 /DB_XREF=gi:13385935 /GEN=2010317E03Rik /FEA=FLmRNA /CNT=170 /TID=Mm.28897.1 /TIER=FL+Stack /STK=62 /UG=Mm.28897 /LL=67895 /DEF=Mus musculus RIKEN cDNA 2010317E03 gene (2010317E03Rik), mRNA. /PROD=RIKEN cDNA 2010317E03 /FL=gb:NM_026438.1 gb:BC010468.1	-0.41553	-0.17372	0.37789	-0.55382	-0.52089	-0.68601	-0.42758	-0.27379	-0.37091	-0.58288	-0.8521	-0.52456
1417092_at	Pth1r	parathyroid hormone 1 receptor	0001501 // skeletal system development // inferred from mutant phenotype /// 0001503 // ossification // inferred from mutant phenotype /// 0002062 // chondrocyte differentiation // inferred from genetic interaction /// 0002062 // chondrocyte differentiation // inferred from mutant phenotype /// 0002076 // osteoblast development // inferred from mutant phenotype /// 0006874 // cellular calcium ion…	0005622 // intracellular // inferred from direct assay /// 0005634 // nucleus // inferred from electronic annotation /// 0005737 // cytoplasm // inferred from electronic annotation /// 0005886 // plasma membrane // inferred from electronic annotation /// 0016020 // membrane // inferred from electronic annotation /// 0016021 // integral to membrane // inferred from electronic annotation /// 001632…	0004871 // signal transducer activity // inferred from electronic annotation /// 0004872 // receptor activity // inferred from electronic annotation /// 0004888 // transmembrane receptor activity // inferred from electronic annotation /// 0004930 // G-protein coupled receptor activity // inferred from electronic annotation /// 0004991 // parathyroid hormone receptor activity // inferred from muta…	GPCRDB_Class_B_Secretin-like // GenMAPP	gb:BC013446.1 /DB_XREF=gi:15488603 /FEA=FLmRNA /CNT=107 /TID=Mm.3542.1 /TIER=FL+Stack /STK=57 /UG=Mm.3542 /LL=19228 /UG_GENE=Pthr /DEF=Mus musculus, parathyroid hormone receptor, clone MGC:18447 IMAGE:4241234, mRNA, complete cds. /PROD=parathyroid hormone receptor /FL=gb:BC013446.1 gb:NM_011199.1	-0.25872	-0.1806	0.43351	-0.32243	-0.57558	-0.30686	-0.8515	-0.7181	-0.44101	-1.2245	-1.2047	-1.1984
1417133_at	Pmp22	peripheral myelin protein 22	0007049 // cell cycle // inferred from electronic annotation /// 0007050 // cell cycle arrest // inferred from electronic annotation /// 0008285 // negative regulation of cell proliferation // inferred from electronic annotation /// 0030154 // cell differentiation // inferred from electronic annotation /// 0032288 // myelin assembly // inferred from mutant phenotype	0005923 // tight junction // inferred from electronic annotation /// 0016020 // membrane // inferred from electronic annotation /// 0016021 // integral to membrane // inferred from electronic annotation /// 0043218 // compact myelin // inferred from electronic annotation	---	---	gb:NM_008885.1 /DB_XREF=gi:6679394 /GEN=Pmp22 /FEA=FLmRNA /CNT=95 /TID=Mm.1237.1 /TIER=FL+Stack /STK=55 /UG=Mm.1237 /LL=18858 /DEF=Mus musculus peripheral myelin protein, 22 kDa (Pmp22), mRNA. /PROD=peripheral myelin protein, 22 kDa /FL=gb:BC010765.1 gb:M32240.1 gb:NM_008885.1	0.020318	0.46297	0.64524	-0.037292	-0.21174	0.013094	-0.25256	-0.13926	-0.53367	-0.59691	-0.5226	-0.36552
1417149_at	P4ha2	procollagen-proline, 2-oxoglutarate 4-dioxygenase (proline 4-hydroxylase), alpha II polypeptide	0018401 // peptidyl-proline hydroxylation to 4-hydroxy-L-proline // inferred from direct assay /// 0055114 // oxidation reduction // inferred from electronic annotation	0005783 // endoplasmic reticulum // inferred from electronic annotation /// 0005788 // endoplasmic reticulum lumen // inferred from electronic annotation	0004656 // procollagen-proline 4-dioxygenase activity // inferred from direct assay /// 0004656 // procollagen-proline 4-dioxygenase activity // inferred from electronic annotation /// 0005488 // binding // inferred from electronic annotation /// 0005506 // iron ion binding // inferred from electronic annotation /// 0005515 // protein binding // inferred from physical interaction /// 0005515 // p…	---	gb:NM_011031.1 /DB_XREF=gi:6754969 /GEN=P4ha2 /FEA=FLmRNA /CNT=86 /TID=Mm.3705.1 /TIER=FL+Stack /STK=55 /UG=Mm.3705 /LL=18452 /DEF=Mus musculus procollagen-proline, 2-oxoglutarate 4-dioxygenase (proline 4-hydroxylase), alpha II polypeptide (P4ha2), mRNA. /PROD=procollagen-proline, 2-oxoglutarate4-dioxygenase (proline 4-hydroxylase), alpha IIpolypeptide /FL=gb:BC018411.1 gb:NM_011031.1 gb:U16163.1	0.051644	0.40965	0.47409	-0.39597	-0.84179	-0.51071	-0.74669	-0.32843	-0.23	-1.2504	-0.55655	-0.86663
1417327_at	Cav2	caveolin 2	0001937 // negative regulation of endothelial cell proliferation // inferred from mutant phenotype /// 0006897 // endocytosis // traceable author statement /// 0006906 // vesicle fusion // inferred from electronic annotation /// 0007005 // mitochondrion organization // inferred from mutant phenotype /// 0007029 // endoplasmic reticulum organization // inferred from mutant phenotype /// 0007268 //…	0005622 // intracellular // inferred from electronic annotation /// 0005624 // membrane fraction // inferred from electronic annotation /// 0005634 // nucleus // inferred from electronic annotation /// 0005737 // cytoplasm // inferred from electronic annotation /// 0005794 // Golgi apparatus // inferred from electronic annotation /// 0005811 // lipid particle // inferred from electronic annotatio…	0005515 // protein binding // inferred from electronic annotation /// 0019905 // syntaxin binding // inferred from electronic annotation /// 0042803 // protein homodimerization activity // not recorded /// 0042803 // protein homodimerization activity // inferred from electronic annotation /// 0051219 // phosphoprotein binding // inferred from electronic annotation	Integrin-mediated_cell_adhesion_KEGG // GenMAPP	gb:NM_016900.1 /DB_XREF=gi:18702316 /GEN=Cav2 /FEA=FLmRNA /CNT=95 /TID=Mm.31915.1 /TIER=FL+Stack /STK=48 /UG=Mm.31915 /LL=12390 /DEF=Mus musculus caveolin 2 (Cav2), mRNA. /PROD=caveolin 2 /FL=gb:BC023095.1 gb:NM_016900.1 gb:AF141322.1 gb:AB049604.1	-0.14668	0.30148	0.61247	-0.18257	-0.15246	-0.27941	-0.42668	-0.34034	-0.32252	-0.6976	-0.63723	-0.89365
1417355_at	Peg3	paternally expressed 3	0006915 // apoptosis // inferred from electronic annotation	0005622 // intracellular // inferred from electronic annotation /// 0005634 // nucleus // inferred from electronic annotation /// 0005737 // cytoplasm // inferred from electronic annotation	0003676 // nucleic acid binding // inferred from electronic annotation /// 0008270 // zinc ion binding // inferred from electronic annotation /// 0046872 // metal ion binding // inferred from electronic annotation	---	gb:AB003040.1 /DB_XREF=gi:18958238 /GEN=Peg3 /FEA=FLmRNA /CNT=138 /TID=Mm.7952.1 /TIER=FL+Stack /STK=47 /UG=Mm.7952 /LL=18616 /DEF=Mus musculus Peg3 mRNA for zinc finger protein, complete cds. /PROD=zinc finger protein /FL=gb:AB003040.1 gb:AF038939.1 gb:NM_008817.1	-0.49912	-0.16814	-0.0030722	-1.079	-1.0926	-0.70647	-1.0731	-0.46078	-0.46368	-1.2676	-1.0433	-1.2928
1417455_at	Tgfb3	transforming growth factor, beta 3	0000187 // activation of MAPK activity // inferred from electronic annotation /// 0001666 // response to hypoxia // inferred from electronic annotation /// 0001701 // in utero embryonic development // inferred from mutant phenotype /// 0006917 // induction of apoptosis // inferred from mutant phenotype /// 0007184 // SMAD protein nuclear translocation // inferred from electronic annotation /// 00…	0005576 // extracellular region // inferred from electronic annotation /// 0005615 // extracellular space // inferred from electronic annotation /// 0005634 // nucleus // inferred from electronic annotation /// 0005737 // cytoplasm // inferred from electronic annotation /// 0009986 // cell surface // inferred from electronic annotation /// 0030141 // secretory granule // inferred from electronic …	0005114 // type II transforming growth factor beta receptor binding // inferred from electronic annotation /// 0005160 // transforming growth factor beta receptor binding // inferred from electronic annotation /// 0008083 // growth factor activity // inferred from electronic annotation /// 0034713 // type I transforming growth factor beta receptor binding // inferred from electronic annotation //…	---	gb:BC014690.1 /DB_XREF=gi:15928416 /FEA=FLmRNA /CNT=145 /TID=Mm.1291.1 /TIER=FL+Stack /STK=44 /UG=Mm.1291 /LL=21809 /UG_GENE=Tgfb3 /DEF=Mus musculus, Transforming growth factor, beta 3, clone MGC:18512 IMAGE:3663150, mRNA, complete cds. /PROD=Transforming growth factor, beta 3 /FL=gb:NM_009368.1 gb:M32745.1 gb:BC014690.1	0.21951	0.56702	0.53425	-0.16919	-0.46294	0.067956	-0.29302	-0.13863	-0.195	-0.82079	-0.58568	-0.49724
1417484_at	Ibsp	integrin binding sialoprotein	0001503 // ossification // inferred from electronic annotation /// 0007155 // cell adhesion // inferred from electronic annotation /// 0007229 // integrin-mediated signaling pathway // inferred from electronic annotation /// 0030198 // extracellular matrix organization // inferred from direct assay /// 0031214 // biomineral formation // inferred from electronic annotation	0005576 // extracellular region // inferred from electronic annotation /// 0005615 // extracellular space // inferred from electronic annotation /// 0031988 // membrane-bounded vesicle // inferred from electronic annotation	0005515 // protein binding // inferred from electronic annotation	---	gb:NM_008318.1 /DB_XREF=gi:6680334 /GEN=Ibsp /FEA=FLmRNA /CNT=54 /TID=Mm.4987.1 /TIER=FL+Stack /STK=44 /UG=Mm.4987 /LL=15891 /DEF=Mus musculus integrin binding sialoprotein (Ibsp), mRNA. /PROD=integrin binding sialoprotein /FL=gb:L20232.1 gb:L23801.1 gb:NM_008318.1	-0.081476	0.1684	0.59174	-0.26565	-0.43881	-0.32607	-0.72111	-0.40756	-0.21981	-1.1106	-0.70994	-1.0639
1417494_a_at	Cp	ceruloplasmin	0006810 // transport // inferred from electronic annotation /// 0006811 // ion transport // inferred from electronic annotation /// 0006825 // copper ion transport // inferred from electronic annotation /// 0055114 // oxidation reduction // inferred from electronic annotation	0005576 // extracellular region // inferred from electronic annotation /// 0005615 // extracellular space // inferred from direct assay	0004322 // ferroxidase activity // inferred from direct assay /// 0004322 // ferroxidase activity // inferred from electronic annotation /// 0005507 // copper ion binding // inferred from direct assay /// 0005507 // copper ion binding // inferred from electronic annotation /// 0016491 // oxidoreductase activity // inferred from electronic annotation /// 0046872 // metal ion binding // inferred fr…	---	gb:NM_007752.1 /DB_XREF=gi:6680996 /GEN=Cp /FEA=FLmRNA /CNT=332 /TID=Mm.13787.1 /TIER=FL+Stack /STK=43 /UG=Mm.13787 /LL=12870 /DEF=Mus musculus ceruloplasmin (Cp), mRNA. /PROD=ceruloplasmin /FL=gb:U49430.1 gb:NM_007752.1	-0.1745	-0.024741	0.58465	-0.30562	-0.57027	-0.27515	-0.52946	-0.30875	-0.40504	-0.66508	-0.40558	-0.75052
1417495_x_at	Cp	ceruloplasmin	0006810 // transport // inferred from electronic annotation /// 0006811 // ion transport // inferred from electronic annotation /// 0006825 // copper ion transport // inferred from electronic annotation /// 0055114 // oxidation reduction // inferred from electronic annotation	0005576 // extracellular region // inferred from electronic annotation /// 0005615 // extracellular space // inferred from direct assay	0004322 // ferroxidase activity // inferred from direct assay /// 0004322 // ferroxidase activity // inferred from electronic annotation /// 0005507 // copper ion binding // inferred from direct assay /// 0005507 // copper ion binding // inferred from electronic annotation /// 0016491 // oxidoreductase activity // inferred from electronic annotation /// 0046872 // metal ion binding // inferred fr…	---	gb:NM_007752.1 /DB_XREF=gi:6680996 /GEN=Cp /FEA=FLmRNA /CNT=332 /TID=Mm.13787.1 /TIER=FL+Stack /STK=43 /UG=Mm.13787 /LL=12870 /DEF=Mus musculus ceruloplasmin (Cp), mRNA. /PROD=ceruloplasmin /FL=gb:U49430.1 gb:NM_007752.1	-0.19351	-0.049021	0.47971	-0.28218	-0.52238	-0.28868	-0.39268	-0.2848	-0.22197	-0.63947	-0.32787	-0.6273
1417496_at	Cp	ceruloplasmin	0006810 // transport // inferred from electronic annotation /// 0006811 // ion transport // inferred from electronic annotation /// 0006825 // copper ion transport // inferred from electronic annotation /// 0055114 // oxidation reduction // inferred from electronic annotation	0005576 // extracellular region // inferred from electronic annotation /// 0005615 // extracellular space // inferred from direct assay	0004322 // ferroxidase activity // inferred from direct assay /// 0004322 // ferroxidase activity // inferred from electronic annotation /// 0005507 // copper ion binding // inferred from direct assay /// 0005507 // copper ion binding // inferred from electronic annotation /// 0016491 // oxidoreductase activity // inferred from electronic annotation /// 0046872 // metal ion binding // inferred fr…	---	gb:BB531328 /DB_XREF=gi:9583257 /DB_XREF=BB531328 /CLONE=E030016E11 /FEA=FLmRNA /CNT=332 /TID=Mm.13787.1 /TIER=Stack /STK=16 /UG=Mm.13787 /LL=12870 /UG_GENE=Cp /UG_TITLE=ceruloplasmin /FL=gb:U49430.1 gb:NM_007752.1	-0.32728	-0.1074	0.49168	-0.55237	-0.5585	-0.20179	-0.75236	-0.41971	-0.70407	-0.80475	-0.75377	-0.88875
1417552_at	Fap	fibroblast activation protein	0006508 // proteolysis // inferred from electronic annotation	0016020 // membrane // inferred from electronic annotation /// 0016021 // integral to membrane // inferred from electronic annotation /// 0030027 // lamellipodium // inferred from electronic annotation	0004252 // serine-type endopeptidase activity // inferred from electronic annotation /// 0008233 // peptidase activity // inferred from direct assay /// 0008233 // peptidase activity // not recorded /// 0008233 // peptidase activity // inferred from electronic annotation /// 0008236 // serine-type peptidase activity // inferred from electronic annotation /// 0016787 // hydrolase activity // infer…	---	gb:NM_007986.1 /DB_XREF=gi:6679748 /GEN=Fap /FEA=FLmRNA /CNT=52 /TID=Mm.41816.1 /TIER=FL+Stack /STK=42 /UG=Mm.41816 /LL=14089 /DEF=Mus musculus fibroblast activation protein (Fap), mRNA. /PROD=fibroblast activation protein /FL=gb:BC019190.1 gb:NM_007986.1	-0.11918	0.38452	0.81193	-0.085413	-0.47404	-0.34383	-0.6909	-0.40011	-0.48633	-0.92177	-0.65641	-0.75951
1417599_at	Cd276	CD276 antigen	0030501 // positive regulation of bone mineralization // inferred from mutant phenotype /// 0042102 // positive regulation of T cell proliferation // inferred from electronic annotation /// 0042110 // T cell activation // inferred from electronic annotation /// 0042130 // negative regulation of T cell proliferation // inferred from direct assay /// 0042130 // negative regulation of T cell prolife…	0009897 // external side of plasma membrane // inferred from direct assay /// 0016020 // membrane // inferred from electronic annotation /// 0016021 // integral to membrane // inferred from electronic annotation	0005102 // receptor binding // inferred from direct assay /// 0005102 // receptor binding // inferred from mutant phenotype /// 0005515 // protein binding // inferred from sequence or structural similarity	---	gb:NM_133983.1 /DB_XREF=gi:19527205 /GEN=AU016588 /FEA=FLmRNA /CNT=75 /TID=Mm.5356.1 /TIER=FL+Stack /STK=41 /UG=Mm.5356 /LL=102657 /DEF=Mus musculus expressed sequence AU016588 (AU016588), mRNA. /PROD=expressed sequence AU016588 /FL=gb:BC019436.1 gb:NM_133983.1	0.085841	0.61069	0.7345	0.030876	-0.5623	-0.13727	-0.25255	-0.33604	-0.3589	-0.52016	-0.17214	-0.57872
1417625_s_at	Cxcr7	chemokine (C-X-C motif) receptor 7	0007165 // signal transduction // inferred from electronic annotation /// 0007186 // G-protein coupled receptor protein signaling pathway // inferred from electronic annotation	0005886 // plasma membrane // inferred from electronic annotation /// 0016020 // membrane // inferred from electronic annotation /// 0016021 // integral to membrane // inferred from electronic annotation	0004871 // signal transducer activity // inferred from electronic annotation /// 0004872 // receptor activity // inferred from electronic annotation /// 0004930 // G-protein coupled receptor activity // inferred from electronic annotation /// 0005515 // protein binding // inferred from electronic annotation	GPCRDB_Class_A_Rhodopsin-like // GenMAPP /// Smooth_muscle_contraction // GenMAPP	gb:BC015254.1 /DB_XREF=gi:15929639 /FEA=FLmRNA /CNT=72 /TID=Mm.6522.1 /TIER=FL+Stack /STK=40 /UG=Mm.6522 /LL=12778 /UG_GENE=Cmkor1 /DEF=Mus musculus, chemokine orphan receptor 1, clone MGC:18378 IMAGE:4242244, mRNA, complete cds. /PROD=chemokine orphan receptor 1 /FL=gb:BC015254.1 gb:NM_007722.1 gb:AF000236.1	0.29611	0.91787	0.73774	0.18115	-0.36166	0.046362	-0.2198	0.10936	-0.13993	-0.69372	-0.42844	-0.11559
1417644_at	Sspn	sarcospan	---	0005886 // plasma membrane // inferred from electronic annotation /// 0016020 // membrane // inferred from electronic annotation /// 0016021 // integral to membrane // inferred from electronic annotation /// 0030054 // cell junction // inferred from electronic annotation /// 0030133 // transport vesicle // inferred from electronic annotation /// 0042383 // sarcolemma // inferred from direct assay…	---	---	gb:NM_010656.1 /DB_XREF=gi:6754475 /GEN=Sspn /FEA=FLmRNA /CNT=118 /TID=Mm.1209.1 /TIER=FL+Stack /STK=40 /UG=Mm.1209 /LL=16651 /DEF=Mus musculus sarcospan (Sspn), mRNA. /PROD=sarcospan /FL=gb:NM_010656.1 gb:BC021484.1 gb:U02487.1	0.20318	0.26979	0.47553	-0.14323	-0.40565	-0.21844	-0.2497	-0.16193	-0.4676	-0.90905	-0.60922	-0.80734
1417649_at	Cdkn1c	cyclin-dependent kinase inhibitor 1C (P57)	0000122 // negative regulation of transcription from RNA polymerase II promoter // inferred from genetic interaction /// 0007049 // cell cycle // inferred from electronic annotation /// 0007050 // cell cycle arrest // inferred from electronic annotation /// 0030511 // positive regulation of transforming growth factor beta receptor signaling pathway // inferred from electronic annotation /// 00325…	0005634 // nucleus // inferred from direct assay /// 0005634 // nucleus // inferred from electronic annotation /// 0005737 // cytoplasm // inferred from electronic annotation	0004860 // protein kinase inhibitor activity // inferred from electronic annotation /// 0004861 // cyclin-dependent protein kinase inhibitor activity // inferred from electronic annotation /// 0005515 // protein binding // inferred from physical interaction /// 0005515 // protein binding // inferred from electronic annotation /// 0016301 // kinase activity // inferred from electronic annotation /…	G1_to_S_cell_cycle_Reactome // GenMAPP	gb:NM_009876.1 /DB_XREF=gi:6753387 /GEN=Cdkn1c /FEA=FLmRNA /CNT=214 /TID=Mm.168789.1 /TIER=FL+Stack /STK=39 /UG=Mm.168789 /LL=12577 /DEF=Mus musculus cyclin-dependent kinase inhibitor 1C (P57) (Cdkn1c), mRNA. /PROD=cyclin-dependent kinase inhibitor 1C (P57) /FL=gb:U20553.1 gb:NM_009876.1 gb:U22399.1 gb:BC005412.1	-0.11878	0.63529	0.51524	-0.31366	-0.52922	-0.27602	-0.47423	-0.55542	-0.64285	-0.81073	-0.81315	-0.71849
1417673_at	Grb14	growth factor receptor bound protein 14	0007165 // signal transduction // traceable author statement /// 0007165 // signal transduction // inferred from electronic annotation /// 0007242 // intracellular signaling cascade // inferred from electronic annotation /// 0046627 // negative regulation of insulin receptor signaling pathway // inferred from electronic annotation	0005737 // cytoplasm // inferred from electronic annotation /// 0005768 // endosome // inferred from electronic annotation /// 0005792 // microsome // inferred from electronic annotation /// 0005794 // Golgi apparatus // inferred from electronic annotation /// 0005886 // plasma membrane // inferred from electronic annotation /// 0016020 // membrane // inferred from electronic annotation /// 00198…	0004872 // receptor activity // inferred from electronic annotation /// 0005070 // SH3/SH2 adaptor activity // inferred from physical interaction /// 0005158 // insulin receptor binding // inferred from electronic annotation /// 0005515 // protein binding // inferred from electronic annotation /// 0051219 // phosphoprotein binding // inferred from electronic annotation	---	gb:NM_016719.1 /DB_XREF=gi:7710031 /GEN=Grb14 /FEA=FLmRNA /CNT=54 /TID=Mm.33806.1 /TIER=FL+Stack /STK=39 /UG=Mm.33806 /LL=50915 /DEF=Mus musculus growth factor receptor bound protein 14 (Grb14), mRNA. /PROD=growth factor receptor bound protein 14 /FL=gb:NM_016719.1 gb:AF155647.1	-0.24411	-0.31017	-0.14688	-0.31537	-0.33117	-0.36327	-0.23916	-0.3138	-0.2224	-0.785	-0.71093	-0.8598
1417730_at	Ext1	exostoses (multiple) 1	0001503 // ossification // inferred from electronic annotation /// 0007369 // gastrulation // inferred from mutant phenotype /// 0007492 // endoderm development // inferred from mutant phenotype /// 0007498 // mesoderm development // inferred from mutant phenotype /// 0015012 // heparan sulfate proteoglycan biosynthetic process // inferred from direct assay /// 0015014 // heparan sulfate proteogl…	0005783 // endoplasmic reticulum // inferred from electronic annotation /// 0005794 // Golgi apparatus // inferred from electronic annotation /// 0016020 // membrane // inferred from electronic annotation /// 0016021 // integral to membrane // inferred from electronic annotation /// 0030176 // integral to endoplasmic reticulum membrane // inferred from direct assay /// 0031227 // intrinsic to end…	0005515 // protein binding // inferred from electronic annotation /// 0016740 // transferase activity // inferred from electronic annotation /// 0016757 // transferase activity, transferring glycosyl groups // inferred from electronic annotation /// 0016758 // transferase activity, transferring hexosyl groups // inferred from electronic annotation /// 0042803 // protein homodimerization activity …	---	gb:NM_010162.1 /DB_XREF=gi:7106308 /GEN=Ext1 /FEA=FLmRNA /CNT=92 /TID=Mm.1424.1 /TIER=FL+Stack /STK=37 /UG=Mm.1424 /LL=14042 /DEF=Mus musculus exostoses (multiple) 1 (Ext1), mRNA. /PROD=exostoses (multiple) 1 /FL=gb:NM_010162.1 gb:U78539.1 gb:BC004741.1	-0.086121	0.51382	0.4634	-0.42665	-0.45189	-0.23006	-0.54493	-0.41241	-0.68735	-0.50012	-0.55899	-0.65824
1417818_at	Wwtr1	WW domain containing transcription regulator 1	0000122 // negative regulation of transcription from RNA polymerase II promoter // inferred from genetic interaction /// 0001649 // osteoblast differentiation // inferred from genetic interaction /// 0001649 // osteoblast differentiation // inferred from mutant phenotype /// 0006350 // transcription // inferred from electronic annotation /// 0032835 // glomerulus development // inferred from muta…	0005634 // nucleus // inferred from direct assay /// 0005634 // nucleus // inferred from sequence or structural similarity /// 0005634 // nucleus // inferred from electronic annotation /// 0005667 // transcription factor complex // inferred from direct assay /// 0005737 // cytoplasm // inferred from direct assay /// 0005737 // cytoplasm // inferred from electronic annotation	0003713 // transcription coactivator activity // inferred from direct assay /// 0003714 // transcription corepressor activity // inferred from genetic interaction /// 0005515 // protein binding // inferred from physical interaction /// 0005515 // protein binding // inferred from electronic annotation /// 0030528 // transcription regulator activity // inferred from direct assay /// 0042802 // iden…	---	gb:BB535786 /DB_XREF=gi:16446589 /DB_XREF=BB535786 /CLONE=E030045N14 /FEA=FLmRNA /CNT=274 /TID=Mm.28060.1 /TIER=Stack /STK=43 /UG=Mm.28060 /LL=97064 /UG_GENE=2310058J06Rik /UG_TITLE=RIKEN cDNA 2310058J06 gene /FL=gb:BC014727.1 gb:BC004640.1 gb:NM_133784.1	0.051555	0.56807	0.7554	-0.29416	-0.4596	-0.12038	-0.57444	-0.21111	-0.23798	-0.84315	-0.69263	-0.80328
1417838_at	LOC100039614 /// LOC100039753 /// LOC100039810 /// LOC100039926 /// LOC100040017 /// LOC100040031 /// LOC100040489 /// LOC100040673 /// LOC100040744 /// LOC100040786 /// LOC100040873 /// LOC100040911 /// LOC100040943 /// LOC100041207 /// LOC100041223 ///	hypothetical protein LOC100039614 /// similar to putative /// hypothetical protein LOC100039810 /// hypothetical protein LOC100039926 /// similar to putative /// hypothetical protein LOC100040031 /// hypothetical protein LOC100040489 /// similar to putati	0007276 // gamete generation // inferred from electronic annotation	---	---	---	gb:NM_023546.1 /DB_XREF=gi:12963726 /GEN=1700029H17Rik /FEA=FLmRNA /CNT=49 /TID=Mm.20995.1 /TIER=FL+Stack /STK=35 /UG=Mm.20995 /LL=70009 /DEF=Mus musculus RIKEN cDNA 1700029H17 gene (1700029H17Rik), mRNA. /PROD=RIKEN cDNA 1700029H17 /FL=gb:L04851.1 gb:NM_023546.1 gb:L04850.1 gb:L04849.1 gb:M38247.1 gb:L04848.1 gb:M38248.1 gb:L04847.1 gb:L04853.1 gb:L04852.1	0.31143	0.54548	0.094104	1.2111	1.5165	0.80085	0.31961	-0.16797	0.12847	0.19961	0.20553	0.33061
1417960_at	Cpeb1	cytoplasmic polyadenylation element binding protein 1	0006397 // mRNA processing // inferred from electronic annotation /// 0006417 // regulation of translation // inferred from direct assay /// 0006417 // regulation of translation // inferred from electronic annotation /// 0007130 // synaptonemal complex assembly // inferred from mutant phenotype /// 0048168 // regulation of neuronal synaptic plasticity // inferred from mutant phenotype	0000932 // cytoplasmic mRNA processing body // inferred from electronic annotation /// 0005624 // membrane fraction // inferred from direct assay /// 0005737 // cytoplasm // inferred from electronic annotation /// 0005886 // plasma membrane // inferred from electronic annotation /// 0014069 // postsynaptic density // inferred from electronic annotation /// 0016020 // membrane // inferred from ele…	0003676 // nucleic acid binding // inferred from electronic annotation /// 0003723 // RNA binding // inferred from electronic annotation /// 0003729 // mRNA binding // inferred from direct assay /// 0005515 // protein binding // inferred from physical interaction	mRNA_processing_binding_Reactome // GenMAPP	gb:NM_007755.1 /DB_XREF=gi:6681002 /GEN=Cpeb /FEA=FLmRNA /CNT=74 /TID=Mm.22062.1 /TIER=FL+Stack /STK=32 /UG=Mm.22062 /LL=12877 /DEF=Mus musculus cytoplasmic polyadenylation element binding protein (Cpeb), mRNA. /PROD=cytoplasmic polyadenylation element bindingprotein /FL=gb:NM_007755.1	0.66464	0.95709	0.94718	0.41662	0.33889	0.35079	0.40586	0.43108	-0.13212	0.01743	-0.021513	-0.21996
1417980_a_at	Insig2	insulin induced gene 2	0006629 // lipid metabolic process // inferred from electronic annotation /// 0006641 // triglyceride metabolic process // inferred from genetic interaction /// 0006695 // cholesterol biosynthetic process // inferred from genetic interaction /// 0006991 // response to sterol depletion // inferred from direct assay /// 0008202 // steroid metabolic process // inferred from electronic annotation ///…	0005783 // endoplasmic reticulum // inferred from electronic annotation /// 0016020 // membrane // inferred from electronic annotation /// 0016021 // integral to membrane // inferred from electronic annotation	0005515 // protein binding // inferred from physical interaction /// 0008134 // transcription factor binding // inferred from electronic annotation	---	gb:NM_133748.1 /DB_XREF=gi:19526953 /GEN=2900053I11Rik /FEA=FLmRNA /CNT=102 /TID=Mm.27136.1 /TIER=FL+Stack /STK=32 /UG=Mm.27136 /LL=72999 /DEF=Mus musculus RIKEN cDNA 2900053I11 gene (2900053I11Rik), mRNA. /PROD=RIKEN cDNA 2900053I11 /FL=gb:BC024411.1 gb:BC015288.1 gb:NM_133748.1 gb:BC023067.1	-0.052542	0.096077	0.26426	-0.18928	-0.17473	-0.12165	-0.27142	0.015673	-0.17808	-0.6338	-0.50553	-0.63732
1417982_at	Insig2	insulin induced gene 2	0006629 // lipid metabolic process // inferred from electronic annotation /// 0006641 // triglyceride metabolic process // inferred from genetic interaction /// 0006695 // cholesterol biosynthetic process // inferred from genetic interaction /// 0006991 // response to sterol depletion // inferred from direct assay /// 0008202 // steroid metabolic process // inferred from electronic annotation ///…	0005783 // endoplasmic reticulum // inferred from electronic annotation /// 0016020 // membrane // inferred from electronic annotation /// 0016021 // integral to membrane // inferred from electronic annotation	0005515 // protein binding // inferred from physical interaction /// 0008134 // transcription factor binding // inferred from electronic annotation	---	gb:AV257512 /DB_XREF=gi:16388412 /DB_XREF=AV257512 /CLONE=4921537P11 /FEA=FLmRNA /CNT=102 /TID=Mm.27136.1 /TIER=Stack /STK=8 /UG=Mm.27136 /LL=72999 /UG_GENE=2900053I11Rik /UG_TITLE=RIKEN cDNA 2900053I11 gene /FL=gb:BC024411.1 gb:BC015288.1 gb:NM_133748.1 gb:BC023067.1	-0.3129	0.00096733	0.31501	-0.44489	-0.40852	-0.3801	-0.52343	-0.47306	-0.5191	-0.77944	-0.61064	-0.81077
1418158_at	Trp63	transformation related protein 63	0000122 // negative regulation of transcription from RNA polymerase II promoter // inferred from genetic interaction /// 0000122 // negative regulation of transcription from RNA polymerase II promoter // inferred from mutant phenotype /// 0001302 // replicative cell aging // inferred from electronic annotation /// 0001501 // skeletal system development // inferred from mutant phenotype /// 000173…	0005634 // nucleus // inferred from direct assay /// 0005634 // nucleus // not recorded /// 0005634 // nucleus // inferred from electronic annotation /// 0005737 // cytoplasm // not recorded /// 0005737 // cytoplasm // inferred from electronic annotation /// 0019718 // rough microsome // inferred from electronic annotation /// 0030425 // dendrite // inferred from electronic annotation /// 0043234…	0003677 // DNA binding // inferred from direct assay /// 0003677 // DNA binding // inferred from electronic annotation /// 0003682 // chromatin binding // inferred from direct assay /// 0003684 // damaged DNA binding // inferred from direct assay /// 0003690 // double-stranded DNA binding // inferred from electronic annotation /// 0003700 // transcription factor activity // inferred from electron…	Apoptosis // GenMAPP	gb:NM_011641.1 /DB_XREF=gi:6755882 /GEN=Trp63 /FEA=FLmRNA /CNT=47 /TID=Mm.20894.1 /TIER=FL+Stack /STK=29 /UG=Mm.20894 /LL=22061 /DEF=Mus musculus transformation related protein 63 (Trp63), mRNA. /PROD=transformation related protein 63 /FL=gb:AF075439.1 gb:AF075438.1 gb:AB010152.1 gb:NM_011641.1	0.15003	0.36313	-0.0041635	0.88467	0.86547	0.769	0.17365	-0.083706	-0.034412	0.073078	0.10301	-0.081754
1418245_a_at	Rbm9	RNA binding motif protein 9	0006397 // mRNA processing // inferred from electronic annotation /// 0008380 // RNA splicing // inferred from electronic annotation /// 0016481 // negative regulation of transcription // inferred from electronic annotation /// 0016481 // negative regulation of transcription // inferred from sequence or structural similarity /// 0030520 // estrogen receptor signaling pathway // inferred from elec…	0005634 // nucleus // inferred from direct assay /// 0005634 // nucleus // inferred from electronic annotation /// 0005634 // nucleus // inferred from sequence or structural similarity /// 0005737 // cytoplasm // inferred from electronic annotation	0000166 // nucleotide binding // inferred from electronic annotation /// 0003676 // nucleic acid binding // inferred from electronic annotation /// 0003714 // transcription corepressor activity // inferred from electronic annotation /// 0003714 // transcription corepressor activity // inferred from sequence or structural similarity /// 0003723 // RNA binding // inferred from sequence or structura…	mRNA_processing_binding_Reactome // GenMAPP	gb:AF229055.1 /DB_XREF=gi:18461362 /GEN=Hrnbp2 /FEA=FLmRNA /CNT=67 /TID=Mm.25496.1 /TIER=FL+Stack /STK=27 /UG=Mm.25496 /LL=93686 /DEF=Mus musculus hexaribonucleotide binding protein 2 (Hrnbp2) mRNA, complete cds. /PROD=hexaribonucleotide binding protein 2 /FL=gb:NM_053104.1 gb:AF387322.1 gb:AF229055.1	-0.039451	0.50043	0.8664	-0.40074	-0.45417	-0.13187	-0.42811	-0.27221	-0.29132	-0.54277	-0.43925	-0.515
1418285_at	Efnb1	ephrin B1	0001755 // neural crest cell migration // inferred from mutant phenotype /// 0007275 // multicellular organismal development // inferred from electronic annotation /// 0007399 // nervous system development // inferred from electronic annotation /// 0007411 // axon guidance // inferred from mutant phenotype /// 0009880 // embryonic pattern specification // inferred from mutant phenotype /// 003015…	0016020 // membrane // inferred from electronic annotation /// 0016021 // integral to membrane // inferred from electronic annotation /// 0045121 // membrane raft // inferred from direct assay /// 0045202 // synapse // inferred from electronic annotation	0005515 // protein binding // inferred from physical interaction /// 0005515 // protein binding // inferred from electronic annotation /// 0046875 // ephrin receptor binding // inferred from physical interaction	---	gb:NM_010110.1 /DB_XREF=gi:6753725 /GEN=Efnb1 /FEA=FLmRNA /CNT=83 /TID=Mm.3374.1 /TIER=FL+Stack /STK=26 /UG=Mm.3374 /LL=13641 /DEF=Mus musculus ephrin B1 (Efnb1), mRNA. /PROD=ephrin B1 /FL=gb:U12983.1 gb:NM_010110.1	-0.25054	-0.11601	0.2564	-0.35207	-0.56134	-0.41066	-0.65927	-0.44809	-0.25144	-0.71328	-0.52517	-0.72979
1418374_at	Fxyd3	FXYD domain-containing ion transport regulator 3	0006810 // transport // inferred from electronic annotation /// 0006811 // ion transport // inferred from electronic annotation	0016020 // membrane // inferred from electronic annotation /// 0016021 // integral to membrane // inferred from electronic annotation /// 0034707 // chloride channel complex // inferred from electronic annotation	0005216 // ion channel activity // inferred from electronic annotation /// 0005254 // chloride channel activity // inferred from electronic annotation /// 0031404 // chloride ion binding // inferred from electronic annotation	---	gb:NM_008557.1 /DB_XREF=gi:6678813 /GEN=Fxyd3 /FEA=FLmRNA /CNT=44 /TID=Mm.1662.1 /TIER=FL+Stack /STK=24 /UG=Mm.1662 /LL=17178 /DEF=Mus musculus FXYD domain-containing ion transport regulator 3 (Fxyd3), mRNA. /PROD=chloride conductance inducer protein MAT-8precursor /FL=gb:NM_008557.1 gb:BC002039.1	-0.16426	-0.33952	0.16067	-0.45791	-0.46382	-0.47754	-0.64394	-0.39691	-0.56285	-1.1778	-1.1325	-0.85546
1418440_at	Col8a1	collagen, type VIII, alpha 1	0007155 // cell adhesion // inferred from electronic annotation /// 0010811 // positive regulation of cell-substrate adhesion // inferred from direct assay /// 0048593 // camera-type eye morphogenesis // inferred from genetic interaction /// 0050673 // epithelial cell proliferation // inferred from genetic interaction	0005576 // extracellular region // inferred from electronic annotation /// 0005578 // proteinaceous extracellular matrix // inferred from electronic annotation /// 0005604 // basement membrane // inferred from electronic annotation	0005515 // protein binding // inferred from electronic annotation	---	gb:NM_007739.1 /DB_XREF=gi:6680973 /GEN=Col8a1 /FEA=FLmRNA /CNT=73 /TID=Mm.86813.1 /TIER=FL+Stack /STK=23 /UG=Mm.86813 /LL=12837 /DEF=Mus musculus procollagen, type VIII, alpha 1 (Col8a1), mRNA. /PROD=procollagen, type VIII, alpha 1 /FL=gb:BC011061.1 gb:NM_007739.1	0.12634	0.78816	0.6902	-0.15563	-0.57269	-0.4762	-0.64806	-0.30286	-0.39436	-0.83776	-0.26824	-0.72638
1418450_at	Islr	immunoglobulin superfamily containing leucine-rich repeat	---	0005576 // extracellular region // inferred from electronic annotation	0005515 // protein binding // inferred from electronic annotation	---	gb:NM_012043.1 /DB_XREF=gi:6754373 /GEN=Islr /FEA=FLmRNA /CNT=72 /TID=Mm.38426.1 /TIER=FL+Stack /STK=23 /UG=Mm.38426 /LL=26968 /DEF=Mus musculus immunoglobulin superfamily containing leucine-rich repeat (Islr), mRNA. /PROD=immunoglobulin superfamily containingleucine-rich repeat /FL=gb:BC006602.1 gb:NM_012043.1 gb:AB024538.1	0.19502	0.83021	0.86548	0.12053	-0.1899	0.044192	-0.38531	-0.18016	-0.40417	-0.69275	-0.58247	-0.40083
1418455_at	Copz2	coatomer protein complex, subunit zeta 2	0006810 // transport // inferred from electronic annotation /// 0006886 // intracellular protein transport // inferred from electronic annotation /// 0015031 // protein transport // inferred from electronic annotation /// 0016192 // vesicle-mediated transport // inferred from electronic annotation	0005737 // cytoplasm // inferred from electronic annotation /// 0005794 // Golgi apparatus // inferred from electronic annotation /// 0016020 // membrane // inferred from electronic annotation /// 0030117 // membrane coat // inferred from electronic annotation /// 0030126 // COPI vesicle coat // not recorded /// 0030137 // COPI-coated vesicle // inferred from sequence or structural similarity ///…	0005515 // protein binding // inferred from electronic annotation	---	gb:NM_019877.1 /DB_XREF=gi:9845241 /GEN=Copz2 /FEA=FLmRNA /CNT=55 /TID=Mm.22144.1 /TIER=FL+Stack /STK=23 /UG=Mm.22144 /LL=56358 /DEF=Mus musculus coatomer protein complex, subunit zeta 2 (Copz2), mRNA. /PROD=coatomer protein complex, subunit zeta 2 /FL=gb:NM_019877.1 gb:AF237687.1 gb:AB040137.1 gb:BC025122.1 gb:AB047850.1	0.013746	0.25698	0.5249	-0.18894	-0.65647	-0.26927	-0.47713	-0.41404	-0.26698	-0.93875	-0.45475	-0.74363
1418486_at	Vnn1	vanin 1	0002526 // acute inflammatory response // inferred from direct assay /// 0002544 // chronic inflammatory response // inferred from direct assay /// 0006807 // nitrogen compound metabolic process // inferred from electronic annotation /// 0006916 // anti-apoptosis // inferred from mutant phenotype /// 0006954 // inflammatory response // inferred from mutant phenotype /// 0015939 // pantothenate me…	0005615 // extracellular space // inferred from direct assay /// 0005886 // plasma membrane // inferred from electronic annotation /// 0016020 // membrane // inferred from electronic annotation /// 0016021 // integral to membrane // traceable author statement /// 0031225 // anchored to membrane // inferred from electronic annotation	0016787 // hydrolase activity // inferred from electronic annotation /// 0016810 // hydrolase activity, acting on carbon-nitrogen (but not peptide) bonds // inferred from electronic annotation /// 0016811 // hydrolase activity, acting on carbon-nitrogen (but not peptide) bonds, in linear amides // inferred from electronic annotation /// 0017159 // pantetheine hydrolase activity // inferred from e…	---	gb:NM_011704.1 /DB_XREF=gi:6755978 /GEN=Vnn1 /FEA=FLmRNA /CNT=43 /TID=Mm.27154.1 /TIER=FL+Stack /STK=23 /UG=Mm.27154 /LL=22361 /DEF=Mus musculus vanin 1 (Vnn1), mRNA. /PROD=vanin 1 /FL=gb:BC019203.1 gb:NM_011704.1	-0.30163	-0.39986	0.046328	-0.42309	-0.55414	-0.27593	-0.48878	-0.279	0.18309	-0.71606	-0.82369	-0.75623
1418569_at	Fblim1	filamin binding LIM protein 1	0007155 // cell adhesion // inferred from electronic annotation /// 0008360 // regulation of cell shape // inferred from electronic annotation	0005737 // cytoplasm // inferred from electronic annotation /// 0005856 // cytoskeleton // inferred from electronic annotation /// 0005925 // focal adhesion // inferred from electronic annotation /// 0005938 // cell cortex // inferred from electronic annotation /// 0030054 // cell junction // inferred from electronic annotation	0005515 // protein binding // inferred from electronic annotation /// 0008270 // zinc ion binding // inferred from electronic annotation /// 0046872 // metal ion binding // inferred from electronic annotation	---	gb:NM_133754.1 /DB_XREF=gi:19526963 /GEN=2410043F08Rik /FEA=FLmRNA /CNT=133 /TID=Mm.11734.1 /TIER=FL+Stack /STK=21 /UG=Mm.11734 /LL=74202 /DEF=Mus musculus RIKEN cDNA 2410043F08 gene (2410043F08Rik), mRNA. /PROD=RIKEN cDNA 2410043F08 /FL=gb:BC004777.1 gb:NM_133754.1	-0.2711	0.16046	0.48056	-0.42321	-0.71203	-0.45907	-0.6345	-0.37908	-0.58019	-0.35573	-0.48483	-0.49377
1418673_at	Snai2	snail homolog 2 (Drosophila)	0006350 // transcription // inferred from electronic annotation /// 0007275 // multicellular organismal development // inferred from electronic annotation /// 0009314 // response to radiation // inferred from direct assay /// 0009314 // response to radiation // inferred from mutant phenotype /// 0045449 // regulation of transcription // inferred from electronic annotation /// 0045884 // regulatio…	0005622 // intracellular // inferred from electronic annotation /// 0005634 // nucleus // inferred from direct assay /// 0005634 // nucleus // inferred from electronic annotation	0003676 // nucleic acid binding // inferred from electronic annotation /// 0003677 // DNA binding // inferred from electronic annotation /// 0008270 // zinc ion binding // inferred from electronic annotation /// 0046872 // metal ion binding // inferred from electronic annotation	---	gb:NM_011415.1 /DB_XREF=gi:6755575 /GEN=Snai2 /FEA=FLmRNA /CNT=33 /TID=Mm.4272.1 /TIER=FL+Stack /STK=20 /UG=Mm.4272 /LL=20583 /DEF=Mus musculus snail homolog 2 (Drosophila) (Snai2), mRNA. /PROD=snail homolog 2 (Drosophila) /FL=gb:NM_011415.1 gb:U79550.1 gb:U97059.1	-0.14617	0.2725	0.86319	-0.48261	-0.53419	-0.21117	-0.28056	0.053721	-0.27419	-0.52691	-0.32018	-0.34395
1418733_at	Twist1	twist homolog 1 (Drosophila)	0001764 // neuron migration // inferred from mutant phenotype /// 0001843 // neural tube closure // inferred from mutant phenotype /// 0006350 // transcription // inferred from electronic annotation /// 0006355 // regulation of transcription, DNA-dependent // non-traceable author statement /// 0006915 // apoptosis // inferred from mutant phenotype /// 0007275 // multicellular organismal developme…	0005634 // nucleus // inferred from direct assay /// 0005634 // nucleus // inferred from electronic annotation /// 0005634 // nucleus // non-traceable author statement	0003677 // DNA binding // inferred from electronic annotation /// 0003700 // transcription factor activity // non-traceable author statement /// 0005515 // protein binding // inferred from electronic annotation /// 0030528 // transcription regulator activity // inferred from electronic annotation	---	gb:NM_011658.1 /DB_XREF=gi:6755906 /GEN=Twist /FEA=FLmRNA /CNT=37 /TID=Mm.3280.1 /TIER=FL+Stack /STK=19 /UG=Mm.3280 /LL=22160 /DEF=Mus musculus twist gene homolog, (Drosophila) (Twist), mRNA. /PROD=twist gene homolog, (Drosophila) /FL=gb:M63650.1 gb:NM_011658.1	0.02783	0.53044	1.0318	0.090994	-0.10459	0.024642	-0.46495	-0.2004	-0.18295	-0.84862	-0.4652	-0.78498
1418755_at	Tbx15	T-box 15	0006350 // transcription // inferred from electronic annotation /// 0006355 // regulation of transcription, DNA-dependent // inferred from electronic annotation /// 0045449 // regulation of transcription // inferred from electronic annotation /// 0048701 // embryonic cranial skeleton morphogenesis // inferred from mutant phenotype /// 0048704 // embryonic skeletal system morphogenesis // inferred…	0005634 // nucleus // inferred from electronic annotation	0003677 // DNA binding // inferred from electronic annotation /// 0003700 // transcription factor activity // inferred from electronic annotation	---	gb:NM_009323.1 /DB_XREF=gi:6678228 /GEN=Tbx15 /FEA=FLmRNA /CNT=24 /TID=Mm.10797.1 /TIER=FL+Stack /STK=19 /UG=Mm.10797 /LL=21384 /DEF=Mus musculus T-box 15 (Tbx15), mRNA. /PROD=T-box 15 /FL=gb:NM_009323.1 gb:AF041822.1	0.51232	0.52576	0.70081	-0.063554	-0.23021	-0.073049	0.21705	0.28366	0.035605	-0.18578	0.04143	-0.49858
1418796_at	Clec11a	C-type lectin domain family 11, member a	0008284 // positive regulation of cell proliferation // inferred from electronic annotation /// 0008284 // positive regulation of cell proliferation // inferred from sequence or structural similarity	0005576 // extracellular region // inferred from electronic annotation /// 0005576 // extracellular region // inferred from sequence or structural similarity /// 0005737 // cytoplasm // inferred from electronic annotation	0005488 // binding // inferred from electronic annotation /// 0005529 // sugar binding // non-traceable author statement /// 0005529 // sugar binding // inferred from electronic annotation /// 0008083 // growth factor activity // inferred from electronic annotation /// 0008083 // growth factor activity // inferred from sequence or structural similarity	---	gb:NM_009131.1 /DB_XREF=gi:6677868 /GEN=Scgf /FEA=FLmRNA /CNT=39 /TID=Mm.20428.1 /TIER=FL+Stack /STK=18 /UG=Mm.20428 /LL=20256 /DEF=Mus musculus stem cell growth factor (Scgf), mRNA. /PROD=stem cell growth factor /FL=gb:NM_009131.1 gb:BC002001.1 gb:AB009245.1	-0.14745	0.18647	0.48193	-0.16995	-0.70241	-0.22038	-0.58161	-0.51971	-0.37507	-0.99149	-0.74582	-0.812
1418912_at	Plxdc2	plexin domain containing 2	---	0005886 // plasma membrane // not recorded /// 0016020 // membrane // inferred from electronic annotation /// 0016021 // integral to membrane // inferred from electronic annotation	---	---	gb:NM_026162.1 /DB_XREF=gi:16757971 /GEN=1200007L24Rik /FEA=FLmRNA /CNT=64 /TID=Mm.83454.1 /TIER=FL+Stack /STK=16 /UG=Mm.83454 /LL=67448 /DEF=Mus musculus RIKEN cDNA 1200007L24 gene (1200007L24Rik), mRNA. /PROD=tumor endothelial marker 7-related precursor /FL=gb:NM_026162.1 gb:AF378761.1	-0.045472	0.42351	0.83338	-0.034474	0.12871	0.005334	0.099324	-0.14287	-0.13721	-0.55953	-0.56085	-0.35594
1419164_at	Zfp260	zinc finger protein 260	0006350 // transcription // inferred from electronic annotation /// 0007275 // multicellular organismal development // inferred from electronic annotation /// 0045449 // regulation of transcription // inferred from electronic annotation	0005622 // intracellular // inferred from electronic annotation /// 0005634 // nucleus // inferred from electronic annotation	0003676 // nucleic acid binding // inferred from electronic annotation /// 0003677 // DNA binding // inferred from electronic annotation /// 0008270 // zinc ion binding // inferred from electronic annotation /// 0046872 // metal ion binding // inferred from electronic annotation	---	gb:D45210.1 /DB_XREF=gi:633989 /FEA=FLmRNA /CNT=84 /TID=Mm.200569.1 /TIER=FL+Stack /STK=12 /UG=Mm.200569 /LL=26466 /UG_GENE=Zfp260 /DEF=Mouse mRNA for zinc finger protein, complete cds. /PROD=zinc finger protein /FL=gb:D45210.1 gb:NM_011981.1	-0.053446	0.31799	0.55161	-0.14464	-0.13607	-0.098058	-0.42746	0.11559	-0.044969	-0.57198	-0.54222	-0.46318
1419376_at	Fibin	fin bud initiation factor homolog (zebrafish)	---	0005576 // extracellular region // inferred from electronic annotation /// 0005794 // Golgi apparatus // inferred from electronic annotation	---	---	gb:BC027250.1 /DB_XREF=gi:20071231 /FEA=FLmRNA /CNT=70 /TID=Mm.23947.1 /TIER=FL+Stack /STK=10 /UG=Mm.23947 /LL=67606 /UG_GENE=1110018M03Rik /DEF=Mus musculus, RIKEN cDNA 1110018M03 gene, clone MGC:29048 IMAGE:3603588, mRNA, complete cds. /PROD=RIKEN cDNA 1110018M03 gene /FL=gb:NM_026271.1 gb:BC027250.1	-0.2294	0.14804	0.13736	-0.32719	-0.78997	-0.49536	-0.65495	-0.57034	-0.68674	-1.3173	-0.6909	-0.84347
1419378_a_at	Fxyd2	FXYD domain-containing ion transport regulator 2	0006810 // transport // inferred from electronic annotation /// 0006811 // ion transport // inferred from electronic annotation /// 0006813 // potassium ion transport // inferred from electronic annotation /// 0006814 // sodium ion transport // inferred from electronic annotation	0016020 // membrane // inferred from electronic annotation /// 0016021 // integral to membrane // inferred from electronic annotation	0005216 // ion channel activity // inferred from electronic annotation /// 0030955 // potassium ion binding // inferred from electronic annotation /// 0031402 // sodium ion binding // inferred from electronic annotation	Calcium_regulation_in_cardiac_cells // GenMAPP	gb:NM_052823.1 /DB_XREF=gi:16554571 /GEN=Fxyd2 /FEA=FLmRNA /CNT=30 /TID=Mm.22742.1 /TIER=FL+Stack /STK=10 /UG=Mm.22742 /LL=11936 /DEF=Mus musculus FXYD domain-containing ion transport regulator 2 (Fxyd2), transcript variant b, mRNA. /PROD=FXYD domain-containing ion transport regulator2, isoform b /FL=gb:NM_052823.1	-0.45461	-0.42396	0.20819	-0.86479	-1.0713	-0.77695	-0.89336	-0.68798	-0.57967	-1.2437	-1.3357	-1.053
1419379_x_at	Fxyd2	FXYD domain-containing ion transport regulator 2	0006810 // transport // inferred from electronic annotation /// 0006811 // ion transport // inferred from electronic annotation /// 0006813 // potassium ion transport // inferred from electronic annotation /// 0006814 // sodium ion transport // inferred from electronic annotation	0016020 // membrane // inferred from electronic annotation /// 0016021 // integral to membrane // inferred from electronic annotation	0005216 // ion channel activity // inferred from electronic annotation /// 0030955 // potassium ion binding // inferred from electronic annotation /// 0031402 // sodium ion binding // inferred from electronic annotation	Calcium_regulation_in_cardiac_cells // GenMAPP	gb:NM_052823.1 /DB_XREF=gi:16554571 /GEN=Fxyd2 /FEA=FLmRNA /CNT=30 /TID=Mm.22742.1 /TIER=FL+Stack /STK=10 /UG=Mm.22742 /LL=11936 /DEF=Mus musculus FXYD domain-containing ion transport regulator 2 (Fxyd2), transcript variant b, mRNA. /PROD=FXYD domain-containing ion transport regulator2, isoform b /FL=gb:NM_052823.1	-0.34792	-0.29527	0.23215	-0.57497	-0.65072	-0.69868	-0.61944	-0.61818	-0.47274	-0.83564	-0.91024	-0.70986
1419468_at	Clec14a	C-type lectin domain family 14, member a	---	0016020 // membrane // inferred from electronic annotation /// 0016021 // integral to membrane // inferred from electronic annotation	0005488 // binding // inferred from electronic annotation /// 0005529 // sugar binding // inferred from electronic annotation	---	gb:NM_025809.1 /DB_XREF=gi:13385277 /GEN=1200003C23Rik /FEA=FLmRNA /CNT=76 /TID=Mm.74798.1 /TIER=FL+Stack /STK=19 /UG=Mm.74798 /LL=66864 /DEF=Mus musculus RIKEN cDNA 1200003C23 gene (1200003C23Rik), mRNA. /PROD=RIKEN cDNA 1200003C23 /FL=gb:NM_025809.1 gb:BC019452.1	-0.11906	0.085655	0.50701	-0.35748	-0.35061	-0.24804	-0.56922	-0.064323	-0.34062	-0.79554	-0.65073	-0.74445
1419485_at	Foxc1	forkhead box C1	0001501 // skeletal system development // inferred from mutant phenotype /// 0001503 // ossification // inferred from mutant phenotype /// 0001541 // ovarian follicle development // inferred from mutant phenotype /// 0001568 // blood vessel development // inferred from genetic interaction /// 0001654 // eye development // inferred from mutant phenotype /// 0001654 // eye development // not record…	0005634 // nucleus // not recorded /// 0005634 // nucleus // inferred from electronic annotation /// 0005634 // nucleus // inferred from sequence or structural similarity /// 0005720 // nuclear heterochromatin // inferred from electronic annotation /// 0005720 // nuclear heterochromatin // inferred from sequence or structural similarity	0003677 // DNA binding // not recorded /// 0003677 // DNA binding // inferred from electronic annotation /// 0003677 // DNA binding // inferred from sequence or structural similarity /// 0003700 // transcription factor activity // not recorded /// 0003700 // transcription factor activity // inferred from electronic annotation /// 0003700 // transcription factor activity // inferred from sequence …	---	gb:NM_008592.1 /DB_XREF=gi:6679834 /GEN=Foxc1 /FEA=FLmRNA /CNT=61 /TID=Mm.12949.1 /TIER=FL+Stack /STK=9 /UG=Mm.12949 /LL=17300 /DEF=Mus musculus forkhead box C1 (Foxc1), mRNA. /PROD=forkhead box C1 /FL=gb:AF045017.1 gb:NM_008592.1	-0.30398	-0.026963	0.42145	-0.4326	-0.26543	-0.23522	-0.62165	-0.42202	-0.26462	-0.7602	-0.54367	-0.67423
1419550_a_at	Stk39	serine/threonine kinase 39, STE20/SPS1 homolog (yeast)	0006468 // protein amino acid phosphorylation // inferred from electronic annotation	0005624 // membrane fraction // inferred from direct assay /// 0005634 // nucleus // inferred from electronic annotation /// 0005737 // cytoplasm // inferred from electronic annotation /// 0005856 // cytoskeleton // inferred from electronic annotation /// 0016323 // basolateral plasma membrane // inferred from direct assay /// 0016324 // apical plasma membrane // inferred from direct assay	0000166 // nucleotide binding // inferred from electronic annotation /// 0004672 // protein kinase activity // inferred from electronic annotation /// 0004674 // protein serine/threonine kinase activity // inferred from electronic annotation /// 0005515 // protein binding // inferred from physical interaction /// 0005524 // ATP binding // inferred from electronic annotation /// 0016301 // kinase …	---	gb:NM_016866.1 /DB_XREF=gi:8394346 /GEN=Stk39 /FEA=FLmRNA /CNT=129 /TID=Mm.29404.1 /TIER=FL+Stack /STK=8 /UG=Mm.29404 /LL=53416 /DEF=Mus musculus serinethreonine kinase 39, STE20SPS1 homolog (yeast) (Stk39), mRNA. /PROD=serinethreonine kinase 39, STE20SPS1 homolog(yeast) /FL=gb:AF099988.1 gb:NM_016866.1	-0.23862	0.13559	0.15562	-0.78051	-0.50883	-0.098582	-0.59995	-0.3984	-0.2023	-0.90082	-0.39886	-0.79413
1419560_at	Lipc	lipase, hepatic	0006629 // lipid metabolic process // inferred from electronic annotation /// 0008203 // cholesterol metabolic process // inferred from genetic interaction /// 0016042 // lipid catabolic process // inferred from electronic annotation /// 0030301 // cholesterol transport // inferred from mutant phenotype /// 0042632 // cholesterol homeostasis // inferred from genetic interaction	0005576 // extracellular region // inferred from electronic annotation /// 0005615 // extracellular space // inferred from direct assay /// 0034364 // high-density lipoprotein particle // inferred from electronic annotation	0003824 // catalytic activity // inferred from electronic annotation /// 0004806 // triacylglycerol lipase activity // inferred from electronic annotation /// 0008201 // heparin binding // inferred from electronic annotation /// 0016298 // lipase activity // inferred from direct assay /// 0016787 // hydrolase activity // inferred from electronic annotation	Statin_Pathway_PharmGKB // GenMAPP	gb:NM_008280.1 /DB_XREF=gi:6680264 /GEN=Lipc /FEA=FLmRNA /CNT=42 /TID=Mm.362.1 /TIER=FL+Stack /STK=8 /UG=Mm.362 /LL=15450 /DEF=Mus musculus lipase, hepatic (Lipc), mRNA. /PROD=hepatic lipase /FL=gb:BC021841.1 gb:NM_008280.1	-0.29184	-0.20246	0.36063	-0.27611	-0.53499	-0.46906	-0.49092	-0.4158	-0.40287	-1.115	-0.67434	-1.049
1419606_a_at	Tnnt1	troponin T1, skeletal, slow	0003009 // skeletal muscle contraction // inferred from electronic annotation /// 0006937 // regulation of muscle contraction // inferred from electronic annotation /// 0031444 // slow-twitch skeletal muscle fiber contraction // inferred from electronic annotation /// 0045932 // negative regulation of muscle contraction // inferred from electronic annotation	0005861 // troponin complex // inferred from electronic annotation	0005515 // protein binding // not recorded /// 0005515 // protein binding // inferred from electronic annotation /// 0005523 // tropomyosin binding // inferred from electronic annotation /// 0031014 // troponin T binding // inferred from electronic annotation	Striated_muscle_contraction // GenMAPP	gb:NM_011618.1 /DB_XREF=gi:6755840 /GEN=Tnnt1 /FEA=FLmRNA /CNT=15 /TID=Mm.711.1 /TIER=FL+Stack /STK=8 /UG=Mm.711 /LL=21955 /DEF=Mus musculus troponin T1, skeletal, slow (Tnnt1), mRNA. /PROD=troponin T1, skeletal, slow /FL=gb:NM_011618.1 gb:U92883.1 gb:AF020946.1	0.18505	0.24237	0.08643	0.29962	0.23452	0.081416	0.54678	0.7085	0.87932	0.64079	0.39087	0.43602
1419639_at	Efnb2	ephrin B2	0001945 // lymph vessel development // inferred from mutant phenotype /// 0007219 // Notch signaling pathway // inferred from direct assay /// 0007275 // multicellular organismal development // inferred from electronic annotation /// 0007399 // nervous system development // inferred from electronic annotation /// 0009887 // organ morphogenesis // inferred from mutant phenotype /// 0030154 // cell…	0005886 // plasma membrane // inferred from direct assay /// 0016020 // membrane // inferred from electronic annotation /// 0016021 // integral to membrane // inferred from electronic annotation	0005102 // receptor binding // inferred from physical interaction /// 0005515 // protein binding // inferred from physical interaction	---	gb:BB452953 /DB_XREF=gi:16425729 /DB_XREF=BB452953 /CLONE=D130020K03 /FEA=FLmRNA /CNT=152 /TID=Mm.4005.1 /TIER=ConsEnd /STK=1 /UG=Mm.4005 /LL=13642 /UG_GENE=Efnb2 /UG_TITLE=ephrin B2 /FL=gb:U30244.1 gb:U16819.1 gb:L38847.1 gb:NM_010111.1	-0.1882	0.20718	0.54194	-0.28001	-0.38087	-0.20785	-0.51878	-0.25407	-0.42543	-0.6525	-0.5317	-0.64377
1419665_a_at	Nupr1	nuclear protein 1	0002526 // acute inflammatory response // inferred from mutant phenotype /// 0009636 // response to toxin // inferred from mutant phenotype /// 0042771 // DNA damage response, signal transduction by p53 class mediator resulting in induction of apoptosis // inferred from mutant phenotype /// 0043065 // positive regulation of apoptosis // inferred from mutant phenotype /// 0048147 // negative regul…	0005634 // nucleus // inferred from electronic annotation	---	---	gb:NM_019738.1 /DB_XREF=gi:9790144 /GEN=Nupr1 /FEA=FLmRNA /CNT=28 /TID=Mm.18742.1 /TIER=FL /STK=7 /UG=Mm.18742 /LL=56312 /DEF=Mus musculus nuclear protein 1 (Nupr1), mRNA. /PROD=p8 protein /FL=gb:AF131196.1 gb:NM_019738.1 gb:BC002109.1	-0.013661	0.68387	1.0155	-0.3081	-0.42288	-0.11653	-0.65351	-0.32031	-0.55207	-1.1107	-0.9398	-0.73605
1419666_x_at	Nupr1	nuclear protein 1	0002526 // acute inflammatory response // inferred from mutant phenotype /// 0009636 // response to toxin // inferred from mutant phenotype /// 0042771 // DNA damage response, signal transduction by p53 class mediator resulting in induction of apoptosis // inferred from mutant phenotype /// 0043065 // positive regulation of apoptosis // inferred from mutant phenotype /// 0048147 // negative regul…	0005634 // nucleus // inferred from electronic annotation	---	---	gb:NM_019738.1 /DB_XREF=gi:9790144 /GEN=Nupr1 /FEA=FLmRNA /CNT=28 /TID=Mm.18742.1 /TIER=FL /STK=7 /UG=Mm.18742 /LL=56312 /DEF=Mus musculus nuclear protein 1 (Nupr1), mRNA. /PROD=p8 protein /FL=gb:AF131196.1 gb:NM_019738.1 gb:BC002109.1	-0.033618	0.64602	0.93964	-0.33405	-0.49386	-0.15048	-0.70162	-0.38205	-0.57452	-1.0426	-0.8978	-0.72176
1419717_at	Sema3e	sema domain, immunoglobulin domain (Ig), short basic domain, secreted, (semaphorin) 3E	0007275 // multicellular organismal development // inferred from electronic annotation /// 0007399 // nervous system development // inferred from electronic annotation /// 0030154 // cell differentiation // inferred from electronic annotation	0005576 // extracellular region // inferred from electronic annotation /// 0016020 // membrane // inferred from electronic annotation	0004872 // receptor activity // inferred from electronic annotation	---	gb:NM_011348.1 /DB_XREF=gi:7549788 /GEN=Sema3e /FEA=FLmRNA /CNT=13 /TID=Mm.3730.1 /TIER=FL /STK=7 /UG=Mm.3730 /LL=20349 /DEF=Mus musculus sema domain, immunoglobulin domain (Ig), short basic domain, secreted, (semaphorin) 3E (Sema3e), mRNA. /PROD=sema domain, immunoglobulin domain (Ig), shortbasic domain, secreted, (semaphorin) 3E /FL=gb:NM_011348.1	-0.076117	0.15278	0.50387	-0.33815	-0.46484	-0.28725	-0.54036	-0.15574	-0.15142	-0.76977	-0.55426	-0.55618
1419806_at	Hdlbp	high density lipoprotein (HDL) binding protein	0006629 // lipid metabolic process // inferred from electronic annotation /// 0006810 // transport // inferred from electronic annotation /// 0006869 // lipid transport // inferred from electronic annotation /// 0008202 // steroid metabolic process // inferred from electronic annotation /// 0008203 // cholesterol metabolic process // inferred from electronic annotation	0005634 // nucleus // inferred from electronic annotation /// 0005737 // cytoplasm // inferred from electronic annotation /// 0034364 // high-density lipoprotein particle // inferred from electronic annotation	0003723 // RNA binding // inferred from electronic annotation /// 0005515 // protein binding // inferred from electronic annotation	---	gb:C77256 /DB_XREF=gi:2517586 /DB_XREF=C77256 /CLONE=J0028B03 /FEA=EST /CNT=1 /TID=Mm.215181.1 /TIER=ConsEnd /STK=1 /UG=Mm.215181 /LL=52229 /UG_GENE=D1Ertd101e /UG_TITLE=DNA segment, Chr 1, ERATO Doi 101, expressed	-0.27359	0.23043	0.35636	-0.34717	-0.48834	-0.31628	-0.61459	-0.62104	-0.55018	-0.57472	-0.55394	-0.75349
1420097_at	D13Ertd787e	DNA segment, Chr 13, ERATO Doi 787, expressed	---	---	---	---	gb:AU020421 /DB_XREF=gi:3376005 /DB_XREF=AU020421 /CLONE=J0532G06 /FEA=EST /CNT=1 /TID=Mm.200727.1 /TIER=ConsEnd /STK=1 /UG=Mm.200727 /LL=52680 /UG_GENE=D13Ertd787e /UG_TITLE=DNA segment, Chr 13, ERATO Doi 787, expressed	-0.13567	0.26606	0.44341	-0.6692	-1.028	-0.76509	-0.69371	-1.1147	-0.60833	-1.1671	-0.63769	-1.0514
1420537_at	Kctd4	potassium channel tetramerisation domain containing 4	0006813 // potassium ion transport // inferred from electronic annotation	0008076 // voltage-gated potassium channel complex // inferred from electronic annotation /// 0016020 // membrane // inferred from electronic annotation	0005249 // voltage-gated potassium channel activity // inferred from electronic annotation /// 0005515 // protein binding // inferred from electronic annotation	---	gb:NM_026214.1 /DB_XREF=gi:13385719 /GEN=2210017A09Rik /FEA=FLmRNA /CNT=20 /TID=Mm.86004.1 /TIER=FL /STK=4 /UG=Mm.86004 /LL=67516 /DEF=Mus musculus RIKEN cDNA 2210017A09 gene (2210017A09Rik), mRNA. /PROD=RIKEN cDNA 2210017A09 /FL=gb:NM_026214.1	-0.32583	-0.36142	-0.013976	-0.60562	-0.5997	-0.51036	-0.64079	-0.35135	-0.26756	-0.77856	-0.9278	-0.7783
1420559_a_at	Shox2	short stature homeobox 2	0000122 // negative regulation of transcription from RNA polymerase II promoter // inferred from direct assay /// 0001649 // osteoblast differentiation // inferred from mutant phenotype /// 0002053 // positive regulation of mesenchymal cell proliferation // inferred from mutant phenotype /// 0002063 // chondrocyte development // inferred from mutant phenotype /// 0006355 // regulation of transcri…	0005634 // nucleus // inferred from electronic annotation	0003677 // DNA binding // inferred from electronic annotation /// 0003700 // transcription factor activity // inferred from electronic annotation /// 0030528 // transcription regulator activity // inferred from electronic annotation /// 0043565 // sequence-specific DNA binding // inferred from electronic annotation	---	gb:NM_013665.1 /DB_XREF=gi:7305488 /GEN=Shox2 /FEA=FLmRNA /CNT=9 /TID=Mm.39093.1 /TIER=FL /STK=4 /UG=Mm.39093 /LL=20429 /DEF=Mus musculus short stature homeobox 2 (Shox2), mRNA. /PROD=short stature homeobox 2 /FL=gb:U66918.1 gb:NM_013665.1	-0.17659	0.071816	0.78544	-0.38923	-0.38864	-0.21106	-0.74216	-0.21619	-0.27383	-0.98711	-0.63662	-0.75455
1420583_a_at	Rora	RAR-related orphan receptor alpha	0006350 // transcription // inferred from electronic annotation /// 0006355 // regulation of transcription, DNA-dependent // inferred from direct assay /// 0006355 // regulation of transcription, DNA-dependent // inferred from electronic annotation /// 0006809 // nitric oxide biosynthetic process // inferred from mutant phenotype /// 0021702 // cerebellar Purkinje cell differentiation // inferred…	0005634 // nucleus // inferred from electronic annotation	0003677 // DNA binding // inferred from direct assay /// 0003677 // DNA binding // inferred from electronic annotation /// 0003700 // transcription factor activity // inferred from direct assay /// 0003700 // transcription factor activity // not recorded /// 0003700 // transcription factor activity // inferred from electronic annotation /// 0003707 // steroid hormone receptor activity // inferred…	Nuclear_Receptors // GenMAPP	gb:NM_013646.1 /DB_XREF=gi:7305438 /GEN=Rora /FEA=FLmRNA /CNT=7 /TID=Mm.8858.1 /TIER=FL /STK=4 /UG=Mm.8858 /LL=19883 /DEF=Mus musculus RAR-related orphan receptor alpha (Rora), mRNA. /PROD=RAR-related orphan receptor alpha /FL=gb:NM_013646.1 gb:U53228.1	0.11282	0.36504	0.66975	-0.23839	-0.44736	-0.059611	-0.34987	0.0033293	-0.47778	-0.77829	-0.5641	-0.62445
1420699_at	Clec7a	C-type lectin domain family 7, member a	0001878 // response to yeast // inferred from direct assay /// 0001879 // detection of yeast // inferred from direct assay /// 0002238 // response to molecule of fungal origin // inferred from direct assay /// 0002752 // cell surface pattern recognition receptor signaling pathway // inferred from direct assay /// 0006910 // phagocytosis, recognition // inferred from direct assay /// 0006910 // ph…	0009897 // external side of plasma membrane // inferred from direct assay /// 0016020 // membrane // inferred from electronic annotation /// 0016021 // integral to membrane // inferred from electronic annotation	0001846 // opsonin binding // inferred from direct assay /// 0001872 // zymosan binding // inferred from direct assay /// 0001874 // zymosan receptor activity // inferred from direct assay /// 0004872 // receptor activity // inferred from electronic annotation /// 0005488 // binding // inferred from electronic annotation /// 0005529 // sugar binding // inferred from electronic annotation /// 0008…	---	gb:NM_020008.1 /DB_XREF=gi:9910159 /GEN=Clecsf12 /FEA=FLmRNA /CNT=13 /TID=Mm.132943.1 /TIER=FL /STK=3 /UG=Mm.132943 /LL=56644 /DEF=Mus musculus C-type (calcium dependent, carbohydrate recognition domain) lectin, superfamily member 12 (Clecsf12), mRNA. /PROD=C-type (calcium dependent, carbohydraterecognition domain) lectin, superfamily member 12 /FL=gb:NM_020008.1 gb:AF262985.1	0.17087	0.009518	-0.39699	0.52948	0.60397	0.3834	0.51057	0.56792	-0.0044695	0.66227	0.48816	0.62547
1420842_at	Ptprf	protein tyrosine phosphatase, receptor type, F	0001960 // negative regulation of cytokine-mediated signaling pathway // inferred from electronic annotation /// 0006470 // protein amino acid dephosphorylation // inferred from electronic annotation /// 0007155 // cell adhesion // inferred from electronic annotation /// 0007156 // homophilic cell adhesion // inferred from electronic annotation /// 0007399 // nervous system development // inferre…	0005624 // membrane fraction // inferred from electronic annotation /// 0005768 // endosome // inferred from electronic annotation /// 0005792 // microsome // inferred from electronic annotation /// 0005886 // plasma membrane // inferred from electronic annotation /// 0016020 // membrane // inferred from electronic annotation /// 0016021 // integral to membrane // inferred from electronic annotat…	0004721 // phosphoprotein phosphatase activity // inferred from electronic annotation /// 0004725 // protein tyrosine phosphatase activity // inferred from electronic annotation /// 0004872 // receptor activity // inferred from electronic annotation /// 0005001 // transmembrane receptor protein tyrosine phosphatase activity // inferred from electronic annotation /// 0005158 // insulin receptor bi…	---	gb:BB794653 /DB_XREF=gi:16964272 /DB_XREF=BB794653 /CLONE=G431001E24 /FEA=FLmRNA /CNT=288 /TID=Mm.29855.1 /TIER=Stack /STK=57 /UG=Mm.29855 /LL=19268 /UG_GENE=Ptprf /UG_TITLE=protein tyrosine phosphatase, receptor-type, F /FL=gb:AF300943.1 gb:NM_011213.1	-0.16177	0.19603	0.32648	-0.26368	-0.29786	-0.28506	-0.46733	-0.31755	-0.46128	-0.75256	-0.58054	-0.58359
1420843_at	Ptprf	protein tyrosine phosphatase, receptor type, F	0001960 // negative regulation of cytokine-mediated signaling pathway // inferred from electronic annotation /// 0006470 // protein amino acid dephosphorylation // inferred from electronic annotation /// 0007155 // cell adhesion // inferred from electronic annotation /// 0007156 // homophilic cell adhesion // inferred from electronic annotation /// 0007399 // nervous system development // inferre…	0005624 // membrane fraction // inferred from electronic annotation /// 0005768 // endosome // inferred from electronic annotation /// 0005792 // microsome // inferred from electronic annotation /// 0005886 // plasma membrane // inferred from electronic annotation /// 0016020 // membrane // inferred from electronic annotation /// 0016021 // integral to membrane // inferred from electronic annotat…	0004721 // phosphoprotein phosphatase activity // inferred from electronic annotation /// 0004725 // protein tyrosine phosphatase activity // inferred from electronic annotation /// 0004872 // receptor activity // inferred from electronic annotation /// 0005001 // transmembrane receptor protein tyrosine phosphatase activity // inferred from electronic annotation /// 0005158 // insulin receptor bi…	---	gb:BF235516 /DB_XREF=gi:11148160 /DB_XREF=602025330F1 /CLONE=IMAGE:4160767 /FEA=FLmRNA /CNT=288 /TID=Mm.29855.1 /TIER=Stack /STK=62 /UG=Mm.29855 /LL=19268 /UG_GENE=Ptprf /UG_TITLE=protein tyrosine phosphatase, receptor-type, F /FL=gb:AF300943.1 gb:NM_011213.1	-0.1288	0.17199	0.33793	-0.16136	-0.28689	-0.19625	-0.44107	-0.30467	-0.43147	-0.63245	-0.54461	-0.52427
1420911_a_at	Mfge8	milk fat globule-EGF factor 8 protein	0006910 // phagocytosis, recognition // inferred from direct assay /// 0006911 // phagocytosis, engulfment // inferred from direct assay /// 0007155 // cell adhesion // inferred from electronic annotation /// 0007338 // single fertilization // inferred from electronic annotation /// 0008284 // positive regulation of cell proliferation // inferred from electronic annotation /// 0043627 // response…	0005615 // extracellular space // inferred from direct assay /// 0005737 // cytoplasm // inferred from electronic annotation /// 0009897 // external side of plasma membrane // inferred from direct assay /// 0016020 // membrane // inferred from electronic annotation /// 0019897 // extrinsic to plasma membrane // inferred from direct assay /// 0019898 // extrinsic to membrane // inferred from elect…	0001786 // phosphatidylserine binding // inferred from direct assay /// 0005178 // integrin binding // inferred from direct assay /// 0005515 // protein binding // inferred from electronic annotation /// 0008429 // phosphatidylethanolamine binding // inferred from direct assay	---	gb:NM_008594.1 /DB_XREF=gi:6678869 /GEN=Mfge8 /FEA=FLmRNA /CNT=60 /TID=Mm.1451.1 /TIER=FL /STK=2 /UG=Mm.1451 /LL=17304 /DEF=Mus musculus milk fat globule-EGF factor 8 protein (Mfge8), mRNA. /PROD=milk fat globule-EGF factor 8 protein /FL=gb:NM_008594.1 gb:M38337.1 gb:AB021130.2	-0.24402	-0.1703	0.30039	-0.33287	-0.62341	-0.51526	-0.52064	-0.54872	-0.51084	-1.2806	-1.0058	-1.1158
1420924_at	Timp2	tissue inhibitor of metalloproteinase 2	0008285 // negative regulation of cell proliferation // inferred from direct assay /// 0030814 // regulation of cAMP metabolic process // inferred from direct assay /// 0043408 // regulation of MAPKKK cascade // inferred from direct assay /// 0045664 // regulation of neuron differentiation // inferred from direct assay /// 0045664 // regulation of neuron differentiation // inferred from mutant ph…	0005576 // extracellular region // inferred from electronic annotation /// 0005578 // proteinaceous extracellular matrix // inferred from electronic annotation /// 0005604 // basement membrane // inferred from direct assay /// 0009986 // cell surface // inferred from direct assay	0004857 // enzyme inhibitor activity // inferred from electronic annotation /// 0005178 // integrin binding // inferred from direct assay /// 0005515 // protein binding // inferred from electronic annotation /// 0008047 // enzyme activator activity // inferred from mutant phenotype /// 0008191 // metalloendopeptidase inhibitor activity // inferred from mutant phenotype /// 0008191 // metalloendop…	Matrix_Metalloproteinases // GenMAPP	gb:NM_011594.1 /DB_XREF=gi:6755790 /GEN=Timp2 /FEA=FLmRNA /CNT=152 /TID=Mm.181969.1 /TIER=FL /STK=2 /UG=Mm.181969 /LL=21858 /DEF=Mus musculus tissue inhibitor of metalloproteinase 2 (Timp2), mRNA. /PROD=tissue inhibitor of metalloproteinase 2 /FL=gb:NM_011594.1 gb:M93954.1 gb:M82858.1	0.11186	0.75506	0.70759	-0.41791	-0.64981	-0.075335	-0.25777	-0.33764	-0.64631	-0.82966	-0.45392	-0.41068
1420941_at	Rgs5	regulator of G-protein signaling 5	0007186 // G-protein coupled receptor protein signaling pathway // traceable author statement /// 0009968 // negative regulation of signal transduction // inferred from electronic annotation	---	0004871 // signal transducer activity // inferred from electronic annotation /// 0005096 // GTPase activator activity // traceable author statement	Calcium_regulation_in_cardiac_cells // GenMAPP /// Smooth_muscle_contraction // GenMAPP	gb:AK004165.1 /DB_XREF=gi:12835246 /GEN=Rgs5 /FEA=FLmRNA /CNT=77 /TID=Mm.20954.1 /TIER=Stack /STK=36 /UG=Mm.20954 /LL=19737 /UG_TITLE=regulator of G-protein signaling 5 /DEF=Mus musculus 18 days embryo whole body cDNA, RIKEN full-length enriched library, clone:1110038N04:regulator of G-protein signaling 5, full insert sequence. /FL=gb:U67188.1 gb:NM_009063.1	0.19782	0.67984	1.0137	-0.11546	-0.51144	-0.14658	-0.34975	-0.29189	-0.58194	-0.52774	-0.67155	-0.91525
1421002_at	Angptl2	angiopoietin-like 2	0007165 // signal transduction // inferred from electronic annotation	0005576 // extracellular region // inferred from electronic annotation /// 0005615 // extracellular space // inferred from electronic annotation	0005102 // receptor binding // inferred from electronic annotation	---	gb:NM_011923.1 /DB_XREF=gi:6753119 /GEN=Angptl2 /FEA=FLmRNA /CNT=39 /TID=Mm.200657.1 /TIER=FL /STK=2 /UG=Mm.200657 /LL=26360 /DEF=Mus musculus angiopoietin-like 2 (Angptl2), mRNA. /PROD=angiopoietin related protein 2 /FL=gb:NM_011923.1 gb:AF125176.1	0.23677	0.91965	0.80245	0.0055363	-0.39542	-0.010989	-0.33717	-0.33862	-0.5137	-0.80218	-0.7294	-0.57546
1421045_at	Mrc2	mannose receptor, C type 2	0006897 // endocytosis // inferred from electronic annotation	0009986 // cell surface // not recorded /// 0016020 // membrane // inferred from electronic annotation /// 0016021 // integral to membrane // inferred from electronic annotation	0004872 // receptor activity // inferred from electronic annotation /// 0005488 // binding // inferred from electronic annotation /// 0005509 // calcium ion binding // inferred from electronic annotation /// 0005518 // collagen binding // not recorded /// 0005529 // sugar binding // not recorded /// 0005529 // sugar binding // inferred from electronic annotation	---	gb:BB528408 /DB_XREF=gi:16444647 /DB_XREF=BB528408 /CLONE=D930046I06 /FEA=FLmRNA /CNT=54 /TID=Mm.9020.1 /TIER=Stack /STK=13 /UG=Mm.9020 /LL=17534 /UG_GENE=Mrc2 /UG_TITLE=mannose receptor, C type 2 /FL=gb:NM_008626.1 gb:U56734.1	0.12904	0.73035	0.85948	0.076454	-0.30777	-0.071442	-0.3945	-0.32129	-0.41184	-0.77953	-0.5409	-0.74416
1421072_at	Irx5	Iroquois related homeobox 5 (Drosophila)	0002027 // regulation of heart rate // inferred from mutant phenotype /// 0006355 // regulation of transcription, DNA-dependent // inferred from electronic annotation /// 0010468 // regulation of gene expression // inferred from mutant phenotype /// 0042551 // neuron maturation // inferred from genetic interaction /// 0045449 // regulation of transcription // inferred from electronic annotation /…	0005634 // nucleus // inferred from electronic annotation	0003677 // DNA binding // inferred from electronic annotation /// 0003700 // transcription factor activity // inferred from electronic annotation /// 0030528 // transcription regulator activity // inferred from electronic annotation /// 0043565 // sequence-specific DNA binding // inferred from electronic annotation	---	gb:NM_018826.1 /DB_XREF=gi:9055249 /GEN=Irx5 /FEA=FLmRNA /CNT=28 /TID=Mm.101153.1 /TIER=FL /STK=2 /UG=Mm.101153 /LL=54352 /DEF=Mus musculus Iroquois related homeobox 5 (Drosophila) (Irx5), mRNA. /PROD=Iroquois related homeobox 5 (Drosophila) /FL=gb:NM_018826.1 gb:AF230074.1	-0.2231	-0.18409	0.52069	-0.24252	-0.09958	-0.28252	-0.60292	-0.44959	-0.32197	-1.0164	-0.82395	-0.95801
1421172_at	Adam12	a disintegrin and metallopeptidase domain 12 (meltrin alpha)	0006508 // proteolysis // inferred from electronic annotation /// 0007155 // cell adhesion // inferred from electronic annotation	0005578 // proteinaceous extracellular matrix // inferred from electronic annotation /// 0005886 // plasma membrane // not recorded /// 0016020 // membrane // inferred from electronic annotation /// 0016021 // integral to membrane // inferred from electronic annotation	0004222 // metalloendopeptidase activity // inferred from electronic annotation /// 0005515 // protein binding // inferred from physical interaction /// 0005515 // protein binding // inferred from electronic annotation /// 0008233 // peptidase activity // inferred from electronic annotation /// 0008237 // metallopeptidase activity // inferred from electronic annotation /// 0008270 // zinc ion bin…	---	gb:BI964347 /DB_XREF=gi:16338752 /DB_XREF=id39e05.x1 /CLONE=IMAGE:5665617 /FEA=FLmRNA /CNT=23 /TID=Mm.41158.1 /TIER=ConsEnd /STK=3 /UG=Mm.41158 /LL=11489 /UG_GENE=Adam12 /UG_TITLE=a disintegrin and metalloproteinase domain 12 (meltrin alpha) /FL=gb:NM_007400.1 gb:D50411.1	-0.16656	0.31115	0.49305	-0.26432	-0.33253	-0.5213	-0.48684	-0.55215	-0.34044	-0.76468	-0.51501	-0.64695
1421182_at	Clec1b	C-type lectin domain family 1, member b	0007166 // cell surface receptor linked signal transduction // traceable author statement	0005887 // integral to plasma membrane // inferred from direct assay /// 0016020 // membrane // inferred from electronic annotation /// 0016021 // integral to membrane // inferred from electronic annotation	0004872 // receptor activity // inferred from electronic annotation /// 0004888 // transmembrane receptor activity // not recorded /// 0005488 // binding // inferred from electronic annotation /// 0005529 // sugar binding // inferred from electronic annotation	---	gb:NM_019985.1 /DB_XREF=gi:9910411 /GEN=Clec2-pending /FEA=FLmRNA /CNT=14 /TID=Mm.30700.1 /TIER=FL /STK=2 /UG=Mm.30700 /LL=56760 /DEF=Mus musculus C-type lectin-like receptor 2 (Clec2-pending), mRNA. /PROD=C-type lectin-like receptor 2 /FL=gb:AF201457.1 gb:NM_019985.1	0.16923	-0.21247	-0.42091	0.33171	0.42579	0.1895	0.3981	0.38068	0.27759	0.61534	0.50534	0.64343
1421433_at	Zfhx4	zinc finger homeodomain 4	0006350 // transcription // inferred from electronic annotation /// 0006355 // regulation of transcription, DNA-dependent // inferred from electronic annotation /// 0045449 // regulation of transcription // inferred from electronic annotation	0005622 // intracellular // inferred from electronic annotation /// 0005634 // nucleus // inferred from electronic annotation	0003676 // nucleic acid binding // inferred from electronic annotation /// 0003677 // DNA binding // inferred from electronic annotation /// 0003700 // transcription factor activity // inferred from electronic annotation /// 0008270 // zinc ion binding // inferred from electronic annotation /// 0030528 // transcription regulator activity // inferred from electronic annotation /// 0043565 // seque…	---	gb:NM_030708.1 /DB_XREF=gi:13507649 /GEN=Zfh4-pending /FEA=FLmRNA /CNT=15 /TID=Mm.41522.1 /TIER=FL /STK=2 /UG=Mm.41522 /LL=80892 /DEF=Mus musculus zinc finger homeodomain 4 (Zfh4-pending), mRNA. /PROD=zinc finger homeodomain 4 /FL=gb:AB024499.1 gb:NM_030708.1	-0.13342	0.064192	0.37983	-0.35734	-0.36572	-0.21239	-0.60469	-0.31938	-0.53387	-1.059	-0.678	-0.80907
1421594_a_at	Sytl2	synaptotagmin-like 2	0005975 // carbohydrate metabolic process // inferred from electronic annotation /// 0006096 // glycolysis // inferred from electronic annotation /// 0006886 // intracellular protein transport // inferred from electronic annotation /// 0006887 // exocytosis // inferred from direct assay /// 0006887 // exocytosis // inferred from electronic annotation /// 0008152 // metabolic process // inferred f…	0005624 // membrane fraction // inferred from direct assay /// 0005737 // cytoplasm // inferred from electronic annotation /// 0005739 // mitochondrion // inferred from direct assay /// 0005829 // cytosol // inferred from direct assay /// 0005886 // plasma membrane // inferred from direct assay /// 0005886 // plasma membrane // inferred from electronic annotation /// 0016020 // membrane // inferr…	0003824 // catalytic activity // inferred from electronic annotation /// 0004459 // L-lactate dehydrogenase activity // inferred from direct assay /// 0004459 // L-lactate dehydrogenase activity // inferred from electronic annotation /// 0004459 // L-lactate dehydrogenase activity // inferred from mutant phenotype /// 0005488 // binding // inferred from electronic annotation /// 0005515 // protei…	Glycolysis_and_Gluconeogenesis // GenMAPP	gb:NM_031394.1 /DB_XREF=gi:13878230 /GEN=Sytl2 /FEA=FLmRNA /CNT=4 /TID=Mm.26751.1 /TIER=FL /STK=2 /UG=Mm.26751 /LL=83671 /DEF=Mus musculus synaptotagmin-like 2 (Sytl2), mRNA. /PROD=synaptotagmin-like 2 /FL=gb:NM_031394.1 gb:AB057754.1	-0.054567	0.094991	0.41475	-0.16952	-0.50534	-0.087576	-0.37552	-0.1785	-0.19264	-0.72189	-0.56181	-0.58744
1421775_at	Fcer1a	Fc receptor, IgE, high affinity I, alpha polypeptide	0000187 // activation of MAPK activity // inferred from direct assay /// 0001812 // positive regulation of type I hypersensitivity // inferred from mutant phenotype /// 0001820 // serotonin secretion // inferred from direct assay /// 0001820 // serotonin secretion // inferred from mutant phenotype /// 0007165 // signal transduction // inferred from direct assay /// 0007166 // cell surface recepto…	0005886 // plasma membrane // inferred from electronic annotation /// 0005887 // integral to plasma membrane // inferred from direct assay /// 0009897 // external side of plasma membrane // inferred from direct assay /// 0016020 // membrane // inferred from electronic annotation /// 0016021 // integral to membrane // inferred from electronic annotation /// 0045121 // membrane raft // traceable au…	0004872 // receptor activity // inferred from electronic annotation /// 0019767 // IgE receptor activity // inferred from direct assay /// 0019767 // IgE receptor activity // inferred from mutant phenotype /// 0019863 // IgE binding // inferred from direct assay /// 0019863 // IgE binding // inferred from mutant phenotype /// 0019863 // IgE binding // inferred from electronic annotation	---	gb:NM_010184.1 /DB_XREF=gi:6753827 /GEN=Fcer1a /FEA=FLmRNA /CNT=2 /TID=Mm.5266.1 /TIER=FL /STK=2 /UG=Mm.5266 /LL=14125 /DEF=Mus musculus Fc receptor, IgE, high affinity I, alpha polypeptide (Fcer1a), mRNA. /PROD=Fc receptor, IgE, high affinity I, alphapolypeptide /FL=gb:NM_010184.1 gb:J05018.1	0.22825	-0.1836	0.056791	0.36055	0.63363	0.55226	0.43637	0.88838	1.1051	0.60527	0.9239	0.81756
1421841_at	Fgfr3	fibroblast growth factor receptor 3	0000165 // MAPKKK cascade // inferred from direct assay /// 0002009 // morphogenesis of an epithelium // inferred from mutant phenotype /// 0006468 // protein amino acid phosphorylation // inferred from electronic annotation /// 0007267 // cell-cell signaling // inferred from electronic annotation /// 0008284 // positive regulation of cell proliferation // inferred from electronic annotation /// …	0005634 // nucleus // inferred from electronic annotation /// 0005737 // cytoplasm // inferred from electronic annotation /// 0005764 // lysosome // inferred from direct assay /// 0009898 // internal side of plasma membrane // inferred from direct assay /// 0009986 // cell surface // inferred from electronic annotation /// 0016020 // membrane // inferred from electronic annotation /// 0016021 // …	0000166 // nucleotide binding // inferred from electronic annotation /// 0004672 // protein kinase activity // inferred from electronic annotation /// 0004713 // protein tyrosine kinase activity // inferred from electronic annotation /// 0004714 // transmembrane receptor protein tyrosine kinase activity // inferred from electronic annotation /// 0004872 // receptor activity // inferred from elect…	---	gb:BB732903 /DB_XREF=gi:16116178 /DB_XREF=BB732903 /CLONE=E970032H17 /FEA=FLmRNA /CNT=82 /TID=Mm.6904.1 /TIER=Stack /STK=12 /UG=Mm.6904 /LL=14184 /UG_GENE=Fgfr3 /UG_TITLE=fibroblast growth factor receptor 3 /FL=gb:M81342.1 gb:NM_008010.1	-0.41582	-0.44078	-0.1231	-0.68562	-0.7745	-0.58577	-0.70193	-0.35644	-0.36678	-1.1681	-0.97707	-0.86296
1421917_at	Pdgfra	platelet derived growth factor receptor, alpha polypeptide	0001701 // in utero embryonic development // inferred from mutant phenotype /// 0006468 // protein amino acid phosphorylation // inferred from electronic annotation /// 0007169 // transmembrane receptor protein tyrosine kinase signaling pathway // inferred from electronic annotation /// 0008284 // positive regulation of cell proliferation // inferred from electronic annotation /// 0009653 // anat…	0005887 // integral to plasma membrane // inferred from electronic annotation /// 0016020 // membrane // inferred from electronic annotation /// 0016021 // integral to membrane // inferred from electronic annotation	0000166 // nucleotide binding // inferred from electronic annotation /// 0004672 // protein kinase activity // inferred from electronic annotation /// 0004713 // protein tyrosine kinase activity // inferred from electronic annotation /// 0004714 // transmembrane receptor protein tyrosine kinase activity // inferred from electronic annotation /// 0004872 // receptor activity // inferred from elect…	---	gb:AW537708 /DB_XREF=gi:7180221 /DB_XREF=G0120F08-3 /CLONE=G0120F08 /FEA=FLmRNA /CNT=98 /TID=Mm.2924.1 /TIER=Stack /STK=10 /UG=Mm.2924 /LL=18595 /UG_GENE=Pdgfra /UG_TITLE=platelet derived growth factor receptor, alpha polypeptide /FL=gb:NM_011058.1 gb:M84607.1 gb:M57683.1	0.1913	0.82724	0.90441	0.20265	-0.11169	0.17825	-0.39798	0.04196	-0.35455	-0.75645	-0.36392	-0.50636
1421979_at	Phex	phosphate regulating gene with homologies to endopeptidases on the X chromosome (hypophosphatemia, vitamin D resistant rickets)	0006508 // proteolysis // inferred from electronic annotation /// 0031214 // biomineral formation // inferred from electronic annotation	0016020 // membrane // inferred from electronic annotation /// 0016021 // integral to membrane // inferred from electronic annotation	0004222 // metalloendopeptidase activity // inferred from electronic annotation /// 0008233 // peptidase activity // inferred from electronic annotation /// 0008237 // metallopeptidase activity // inferred from electronic annotation /// 0008270 // zinc ion binding // inferred from electronic annotation /// 0016787 // hydrolase activity // inferred from electronic annotation /// 0046872 // metal i…	---	gb:BM214765 /DB_XREF=gi:17773035 /DB_XREF=C0855E09-3 /CLONE=C0855E09 /FEA=FLmRNA /CNT=18 /TID=Mm.2529.1 /TIER=Stack /STK=11 /UG=Mm.2529 /LL=18675 /UG_GENE=Phex /UG_TITLE=phosphate regulating neutral endopeptidases on the X chromosome /FL=gb:U73910.1 gb:NM_011077.1 gb:U49908.1 gb:U75646.1	-0.31741	-0.19578	0.3174	-0.37148	-0.3661	-0.47788	-0.66143	-0.6408	-0.71628	-1.5258	-1.136	-1.2811
1422018_at	Hivep2	human immunodeficiency virus type I enhancer binding protein 2	0006350 // transcription // traceable author statement /// 0006350 // transcription // inferred from electronic annotation /// 0007165 // signal transduction // traceable author statement /// 0045449 // regulation of transcription // inferred from electronic annotation	0005622 // intracellular // inferred from electronic annotation /// 0005634 // nucleus // inferred from electronic annotation /// 0005667 // transcription factor complex // traceable author statement	0003676 // nucleic acid binding // inferred from electronic annotation /// 0003677 // DNA binding // inferred from electronic annotation /// 0003700 // transcription factor activity // traceable author statement /// 0008270 // zinc ion binding // inferred from electronic annotation /// 0046872 // metal ion binding // traceable author statement /// 0046872 // metal ion binding // inferred from ele…	---	gb:NM_010437.1 /DB_XREF=gi:6754203 /GEN=Hivep2 /FEA=FLmRNA /CNT=29 /TID=Mm.42157.1 /TIER=FL /STK=1 /UG=Mm.42157 /LL=15273 /DEF=Mus musculus human immunodeficiency virus type I enhancer binding protein 2 (Hivep2), mRNA. /PROD=human immunodeficiency virus type I enhancerbinding protein 2 /FL=gb:NM_010437.1	0.0404	0.94555	0.72895	-0.013108	-0.039427	0.077828	-0.23186	0.020357	-0.29292	-0.50323	-0.33343	-0.36317
1422064_a_at	Zbtb20	zinc finger and BTB domain containing 20	0006350 // transcription // inferred from electronic annotation /// 0045449 // regulation of transcription // inferred from electronic annotation	0005622 // intracellular // inferred from electronic annotation /// 0005634 // nucleus // inferred from direct assay /// 0005634 // nucleus // inferred from electronic annotation	0003676 // nucleic acid binding // inferred from electronic annotation /// 0003677 // DNA binding // inferred from direct assay /// 0003677 // DNA binding // inferred from electronic annotation /// 0005515 // protein binding // inferred from electronic annotation /// 0008270 // zinc ion binding // inferred from electronic annotation /// 0046872 // metal ion binding // inferred from electronic ann…	---	gb:AY028963.1 /DB_XREF=gi:19847823 /FEA=FLmRNA /CNT=8 /TID=Mm.38250.1 /TIER=FL /STK=1 /UG=Mm.38250 /LL=56490 /UG_GENE=Zfp288 /DEF=Mus musculus BTBPOZ zinc finger protein DPZF mRNA, complete cds. /PROD=BTBPOZ zinc finger protein DPZF /FL=gb:AF185576.1 gb:NM_019778.1 gb:AY028963.1	-0.023595	0.21767	0.54209	-0.099078	-0.22113	-0.037022	-0.27661	-0.037834	-0.31234	-0.63462	-0.54236	-0.51876
1422498_at	Mageh1	melanoma antigen, family H, 1	---	0005737 // cytoplasm // inferred from electronic annotation	0005102 // receptor binding // inferred from electronic annotation /// 0008022 // protein C-terminus binding // inferred from electronic annotation	---	gb:AF319981.1 /DB_XREF=gi:12659145 /FEA=FLmRNA /CNT=84 /TID=Mm.6890.1 /TIER=FL+Stack /STK=69 /UG=Mm.6890 /LL=75625 /UG_GENE=2010107K23Rik /DEF=Mus musculus mage-h1 mRNA, complete cds. /PROD=mage-h1 /FL=gb:AF319981.1 gb:NM_023788.1	-0.10944	0.076487	0.65428	-0.22225	-0.55502	-0.2432	-0.47178	-0.3079	-0.13062	-1.0108	-0.46838	-0.88764
1422528_a_at	Zfp36l1	zinc finger protein 36, C3H type-like 1	0000288 // nuclear-transcribed mRNA catabolic process, deadenylation-dependent decay // inferred from direct assay /// 0001570 // vasculogenesis // inferred from mutant phenotype /// 0006402 // mRNA catabolic process // not recorded /// 0006402 // mRNA catabolic process // inferred from electronic annotation /// 0006417 // regulation of translation // inferred from mutant phenotype /// 0043488 //…	0005634 // nucleus // inferred from direct assay /// 0005634 // nucleus // inferred from electronic annotation /// 0005737 // cytoplasm // inferred from direct assay /// 0005829 // cytosol // not recorded /// 0005829 // cytosol // inferred from electronic annotation	0003676 // nucleic acid binding // inferred from electronic annotation /// 0003677 // DNA binding // inferred from electronic annotation /// 0003729 // mRNA binding // not recorded /// 0003729 // mRNA binding // inferred from electronic annotation /// 0005515 // protein binding // inferred from electronic annotation /// 0008270 // zinc ion binding // inferred from electronic annotation /// 001709…	---	gb:BB036959 /DB_XREF=gi:16258396 /DB_XREF=BB036959 /CLONE=5930421O16 /FEA=FLmRNA /CNT=300 /TID=Mm.18571.1 /TIER=Stack /STK=26 /UG=Mm.18571 /LL=12192 /UG_GENE=Zfp36l1 /UG_TITLE=zinc finger protein 36, C3H type-like 1 /FL=gb:NM_007564.1 gb:M58566.1	-0.091994	0.6781	0.51657	-0.099914	0.013394	0.017168	-0.68956	-0.20548	-0.227	-0.49674	-0.36264	-0.31098
1422542_at	Gpr34	G protein-coupled receptor 34	0006886 // intracellular protein transport // inferred from electronic annotation /// 0007165 // signal transduction // inferred from electronic annotation /// 0007186 // G-protein coupled receptor protein signaling pathway // inferred from electronic annotation	0005624 // membrane fraction // inferred from electronic annotation /// 0005625 // soluble fraction // inferred from electronic annotation /// 0005737 // cytoplasm // inferred from electronic annotation /// 0005886 // plasma membrane // inferred from electronic annotation /// 0016020 // membrane // inferred from electronic annotation /// 0016021 // integral to membrane // inferred from electronic…	0004871 // signal transducer activity // inferred from electronic annotation /// 0004872 // receptor activity // inferred from electronic annotation /// 0004930 // G-protein coupled receptor activity // inferred from electronic annotation /// 0008022 // protein C-terminus binding // inferred from electronic annotation /// 0030165 // PDZ domain binding // inferred from electronic annotation /// 00…	GPCRDB_Class_A_Rhodopsin-like // GenMAPP /// GPCRDB_Other // GenMAPP	gb:NM_011823.1 /DB_XREF=gi:6754053 /GEN=Gpr34 /FEA=FLmRNA /CNT=58 /TID=Mm.89979.1 /TIER=FL+Stack /STK=41 /UG=Mm.89979 /LL=23890 /DEF=Mus musculus G protein-coupled receptor 34 (Gpr34), mRNA. /PROD=G protein-coupled receptor 34 /FL=gb:NM_011823.1	-0.12262	0.42183	0.55446	-0.29868	-0.1891	0.38698	-0.43002	0.029784	-0.073072	-0.74007	-0.63277	-0.65638
1422603_at	Rnase4	ribonuclease, RNase A family 4	0001525 // angiogenesis // inferred from electronic annotation /// 0001525 // angiogenesis // inferred from sequence or structural similarity /// 0001666 // response to hypoxia // inferred from sequence or structural similarity /// 0001938 // positive regulation of endothelial cell proliferation // inferred from sequence or structural similarity /// 0006651 // diacylglycerol biosynthetic process …	0005576 // extracellular region // inferred from electronic annotation /// 0005605 // basal lamina // inferred from sequence or structural similarity /// 0005615 // extracellular space // inferred from sequence or structural similarity /// 0005634 // nucleus // inferred from sequence or structural similarity /// 0005730 // nucleolus // inferred from sequence or structural similarity /// 0030426 /…	0003676 // nucleic acid binding // inferred from electronic annotation /// 0003723 // RNA binding // inferred by curator /// 0003779 // actin binding // inferred from sequence or structural similarity /// 0004518 // nuclease activity // inferred from electronic annotation /// 0004519 // endonuclease activity // inferred from electronic annotation /// 0004522 // pancreatic ribonuclease activity //…	---	gb:BC005569.1 /DB_XREF=gi:13542727 /FEA=FLmRNA /CNT=103 /TID=Mm.175173.1 /TIER=FL+Stack /STK=28 /UG=Mm.175173 /LL=58809 /UG_GENE=Rnase4 /DEF=Mus musculus, ribonuclease, RNase A family 4, clone MGC:11599 IMAGE:3967265, mRNA, complete cds. /PROD=ribonuclease, RNase A family 4 /FL=gb:AB041044.1 gb:NM_021472.1 gb:BC005569.1	0.21137	0.81958	1.0568	0.08453	-0.017007	0.25259	-0.29429	0.019079	-0.26078	-0.53425	-0.22077	-0.26133
1422651_at	Adipoq	adiponectin, C1Q and collagen domain containing	0001666 // response to hypoxia // inferred from electronic annotation /// 0006006 // glucose metabolic process // inferred from direct assay /// 0006006 // glucose metabolic process // inferred from mutant phenotype /// 0006635 // fatty acid beta-oxidation // inferred from mutant phenotype /// 0007584 // response to nutrient // inferred from electronic annotation /// 0009744 // response to sucros…	0005576 // extracellular region // inferred from electronic annotation /// 0005615 // extracellular space // inferred from direct assay /// 0005783 // endoplasmic reticulum // inferred from direct assay	0005102 // receptor binding // inferred from direct assay /// 0005179 // hormone activity // inferred from direct assay /// 0005179 // hormone activity // traceable author statement /// 0005179 // hormone activity // inferred from electronic annotation /// 0005515 // protein binding // inferred from physical interaction /// 0042803 // protein homodimerization activity // inferred from electronic …	---	gb:NM_009605.1 /DB_XREF=gi:18373300 /GEN=Acrp30 /FEA=FLmRNA /CNT=91 /TID=Mm.3969.1 /TIER=FL+Stack /STK=21 /UG=Mm.3969 /LL=11450 /DEF=Mus musculus adipocyte complement related protein of 30 kDa (Acrp30), mRNA. /PROD=adipocyte complement related protein of 30 kDa /FL=gb:NM_009605.1 gb:U49915.1 gb:U37222.1	-0.70122	-0.85341	-0.34746	-0.70042	-0.60456	-0.75743	-0.79674	-0.92087	-0.71688	-0.8189	-0.99446	-1.1926
1422817_at	Gp5	glycoprotein 5 (platelet)	0007155 // cell adhesion // inferred from electronic annotation /// 0007596 // blood coagulation // inferred from electronic annotation	0016020 // membrane // inferred from electronic annotation /// 0016021 // integral to membrane // inferred from electronic annotation	0005515 // protein binding // inferred from electronic annotation	---	gb:NM_008148.1 /DB_XREF=gi:6680054 /GEN=Gp5 /FEA=FLmRNA /CNT=16 /TID=Mm.3519.1 /TIER=FL+Stack /STK=11 /UG=Mm.3519 /LL=14729 /DEF=Mus musculus glycoprotein 5 (platelet) (Gp5), mRNA. /PROD=glycoprotein V (platelet) /FL=gb:NM_008148.1	0.26938	-0.20769	-0.53017	0.37958	0.6201	0.29561	0.46472	0.30031	0.32966	0.51144	0.40465	0.65966
1422866_at	Col13a1	collagen, type XIII, alpha 1	0001503 // ossification // inferred from electronic annotation /// 0001763 // morphogenesis of a branching structure // inferred from expression pattern /// 0001958 // endochondral ossification // inferred from expression pattern /// 0007155 // cell adhesion // inferred from electronic annotation /// 0007160 // cell-matrix adhesion // inferred from sequence or structural similarity /// 0007275 //…	0005886 // plasma membrane // inferred from electronic annotation /// 0005911 // cell-cell junction // inferred from direct assay /// 0016020 // membrane // inferred from electronic annotation /// 0016021 // integral to membrane // inferred from electronic annotation	0005515 // protein binding // inferred from electronic annotation /// 0008201 // heparin binding // inferred from electronic annotation	---	gb:NM_007731.1 /DB_XREF=gi:6680961 /GEN=Col13a1 /FEA=FLmRNA /CNT=22 /TID=Mm.10805.1 /TIER=FL+Stack /STK=9 /UG=Mm.10805 /LL=12817 /DEF=Mus musculus procollagen, type XIII, alpha 1 (Col13a1), mRNA. /PROD=procollagen, type XIII, alpha 1 /FL=gb:NM_007731.1 gb:U30292.1	-0.10146	-0.066617	0.56403	-0.13433	-0.38693	-0.16917	-0.36666	-0.34733	-0.31426	-0.77017	-0.70034	-0.73076
1422868_s_at	Gda	guanine deaminase	---	---	0005515 // protein binding // inferred from physical interaction /// 0008270 // zinc ion binding // inferred from electronic annotation /// 0008892 // guanine deaminase activity // inferred from electronic annotation /// 0016787 // hydrolase activity // inferred from electronic annotation /// 0046872 // metal ion binding // inferred from electronic annotation	---	gb:NM_010266.1 /DB_XREF=gi:6753959 /GEN=Gda /FEA=FLmRNA /CNT=51 /TID=Mm.45054.1 /TIER=FL+Stack /STK=9 /UG=Mm.45054 /LL=14544 /DEF=Mus musculus guanine deaminase (Gda), mRNA. /PROD=guanine deaminase /FL=gb:AF174583.1 gb:NM_010266.1	-0.39801	-0.53337	-0.073153	-0.93804	-1.1534	-0.58339	-0.32028	0.1171	0.2348	0.056781	0.068721	-0.034145
1423062_at	Igfbp3	insulin-like growth factor binding protein 3	0001558 // regulation of cell growth // inferred from electronic annotation /// 0001649 // osteoblast differentiation // inferred from expression pattern /// 0001933 // negative regulation of protein amino acid phosphorylation // not recorded /// 0006468 // protein amino acid phosphorylation // not recorded /// 0008285 // negative regulation of cell proliferation // not recorded /// 0043065 // po…	0005576 // extracellular region // inferred from electronic annotation /// 0005615 // extracellular space // inferred from direct assay /// 0005625 // soluble fraction // inferred from electronic annotation /// 0005634 // nucleus // not recorded /// 0042567 // insulin-like growth factor ternary complex // inferred from electronic annotation /// 0042568 // insulin-like growth factor binary complex…	0005520 // insulin-like growth factor binding // inferred from physical interaction /// 0005520 // insulin-like growth factor binding // inferred from electronic annotation /// 0008160 // protein tyrosine phosphatase activator activity // inferred from sequence or structural similarity /// 0019838 // growth factor binding // inferred from electronic annotation /// 0031994 // insulin-like growth f…	Smooth_muscle_contraction // GenMAPP	gb:AV175389 /DB_XREF=gi:16384293 /DB_XREF=AV175389 /CLONE=5730419J04 /FEA=FLmRNA /CNT=174 /TID=Mm.29254.1 /TIER=Stack /STK=73 /UG=Mm.29254 /LL=16009 /UG_GENE=Igfbp3 /UG_TITLE=insulin-like growth factor binding protein 3 /FL=gb:NM_008343.1	0.038933	0.56413	0.47717	-0.24204	-0.59154	-0.1034	-0.56377	-0.17743	-0.31463	-1.0158	-0.78133	-0.67572
1423072_at	6720475J19Rik	RIKEN cDNA 6720475J19 gene	---	---	---	---	gb:AK013431.1 /DB_XREF=gi:12850785 /FEA=FLmRNA /CNT=139 /TID=Mm.100378.1 /TIER=Stack /STK=18 /UG=Mm.100378 /LL=68157 /UG_GENE=6720475J19Rik /UG_TITLE=RIKEN cDNA 6720475J19 gene /DEF=Mus musculus 10, 11 days embryo whole body cDNA, RIKEN full-length enriched library, clone:2810481K15:related to RETROVIRUS-RELATED GAG POLYPROTEIN, full insert sequence. /FL=gb:NM_026586.1	-0.38153	-0.067662	0.37099	-0.42062	-0.13613	-0.16377	-0.62365	-0.13672	-0.17615	-0.68243	-0.51434	-0.77863
1423104_at	Irs1	insulin receptor substrate 1	0002053 // positive regulation of mesenchymal cell proliferation // inferred from genetic interaction /// 0007165 // signal transduction // inferred from electronic annotation /// 0008286 // insulin receptor signaling pathway // inferred from sequence or structural similarity /// 0010907 // positive regulation of glucose metabolic process // inferred from electronic annotation /// 0014065 // phos…	0005634 // nucleus // inferred from direct assay /// 0005737 // cytoplasm // inferred from direct assay /// 0005792 // microsome // inferred from direct assay /// 0005829 // cytosol // not recorded /// 0005886 // plasma membrane // inferred from electronic annotation /// 0005899 // insulin receptor complex // inferred from electronic annotation /// 0005901 // caveola // inferred from electronic a…	0004871 // signal transducer activity // inferred from electronic annotation /// 0004872 // receptor activity // inferred from electronic annotation /// 0005010 // insulin-like growth factor receptor activity // inferred from electronic annotation /// 0005069 // transmembrane receptor protein tyrosine kinase docking protein activity // inferred from electronic annotation /// 0005080 // protein ki…	---	gb:BB345784 /DB_XREF=gi:16404985 /DB_XREF=BB345784 /CLONE=B930058J01 /FEA=FLmRNA /CNT=121 /TID=Mm.4952.1 /TIER=Stack /STK=54 /UG=Mm.4952 /LL=16367 /UG_GENE=Irs1 /UG_TITLE=insulin receptor substrate 1 /FL=gb:L24563.1 gb:NM_010570.1	0.12268	0.30874	0.72099	-0.10248	-0.3612	-0.25925	-0.29489	-0.0077642	-0.40589	-0.74427	-0.55885	-0.81158
1423250_a_at	Tgfb2	transforming growth factor, beta 2	0000902 // cell morphogenesis // inferred from sequence or structural similarity /// 0001501 // skeletal system development // inferred from mutant phenotype /// 0001502 // cartilage condensation // inferred from genetic interaction /// 0001568 // blood vessel development // inferred from mutant phenotype /// 0001654 // eye development // inferred from sequence or structural similarity /// 000182…	0005576 // extracellular region // inferred from electronic annotation /// 0005576 // extracellular region // inferred from sequence or structural similarity /// 0005604 // basement membrane // inferred from electronic annotation /// 0005615 // extracellular space // inferred from direct assay /// 0005615 // extracellular space // inferred from electronic annotation /// 0005737 // cytoplasm // in…	0001540 // beta-amyloid binding // inferred from sequence or structural similarity /// 0005102 // receptor binding // inferred from sequence or structural similarity /// 0005160 // transforming growth factor beta receptor binding // inferred from electronic annotation /// 0005160 // transforming growth factor beta receptor binding // inferred from sequence or structural similarity /// 0005515 // …	---	gb:AI323791 /DB_XREF=gi:4058220 /DB_XREF=mm47e08.x1 /CLONE=IMAGE:524678 /FEA=FLmRNA /CNT=136 /TID=Mm.18213.1 /TIER=Stack /STK=17 /UG=Mm.18213 /LL=21808 /UG_GENE=Tgfb2 /UG_TITLE=transforming growth factor, beta 2 /FL=gb:BC011170.1 gb:NM_009367.1	0.039854	0.35863	0.94284	-0.10071	-0.21965	0.057771	-0.40653	0.058885	-0.27364	-0.84097	-0.64362	-0.63744
1423310_at	Tpbg	trophoblast glycoprotein	---	0005737 // cytoplasm // inferred from direct assay /// 0005783 // endoplasmic reticulum // inferred from direct assay /// 0016020 // membrane // inferred from electronic annotation /// 0016021 // integral to membrane // inferred from electronic annotation	0005515 // protein binding // inferred from electronic annotation	---	gb:BI685137 /DB_XREF=gi:15647765 /DB_XREF=603310134F1 /CLONE=IMAGE:5345985 /FEA=FLmRNA /CNT=56 /TID=Mm.20864.1 /TIER=Stack /STK=17 /UG=Mm.20864 /LL=21983 /UG_GENE=Tpbg /UG_TITLE=trophoblast glycoprotein /FL=gb:NM_011627.1	0.034649	0.39726	0.73072	-0.04962	-0.30026	-0.075525	-0.42745	0.049898	-0.32849	-1.0378	-0.60295	-0.65009
1423311_s_at	Tpbg	trophoblast glycoprotein	---	0005737 // cytoplasm // inferred from direct assay /// 0005783 // endoplasmic reticulum // inferred from direct assay /// 0016020 // membrane // inferred from electronic annotation /// 0016021 // integral to membrane // inferred from electronic annotation	0005515 // protein binding // inferred from electronic annotation	---	gb:BI685137 /DB_XREF=gi:15647765 /DB_XREF=603310134F1 /CLONE=IMAGE:5345985 /FEA=FLmRNA /CNT=56 /TID=Mm.20864.1 /TIER=Stack /STK=17 /UG=Mm.20864 /LL=21983 /UG_GENE=Tpbg /UG_TITLE=trophoblast glycoprotein /FL=gb:NM_011627.1	-0.16408	0.30831	0.50607	-0.24292	-0.23969	-0.066223	-0.53665	-0.089801	-0.45183	-0.94618	-0.64291	-0.72976
1423341_at	Cspg4	chondroitin sulfate proteoglycan 4	0000187 // activation of MAPK activity // inferred from mutant phenotype /// 0001525 // angiogenesis // inferred from electronic annotation /// 0007165 // signal transduction // inferred from electronic annotation /// 0007169 // transmembrane receptor protein tyrosine kinase signaling pathway // inferred from mutant phenotype /// 0007275 // multicellular organismal development // inferred from el…	0005886 // plasma membrane // inferred from direct assay /// 0005886 // plasma membrane // inferred from electronic annotation /// 0016020 // membrane // inferred from electronic annotation /// 0016021 // integral to membrane // inferred from electronic annotation /// 0042995 // cell projection // inferred from electronic annotation	0004871 // signal transducer activity // inferred from electronic annotation /// 0005518 // collagen binding // inferred from electronic annotation	---	gb:BB794656 /DB_XREF=gi:16964275 /DB_XREF=BB794656 /CLONE=G431001F06 /FEA=FLmRNA /CNT=59 /TID=Mm.41329.1 /TIER=Stack /STK=14 /UG=Mm.41329 /LL=121021 /UG_GENE=Cspg4 /UG_TITLE=chondroitin sulfate proteoglycan 4 /FL=gb:NM_139001.1 gb:AF352400.1	-0.1131	0.0093598	0.45917	-0.25668	-0.37926	-0.34005	-0.45765	-0.41093	-0.43078	-1.0407	-0.84293	-0.76824
1423516_a_at	Nid2	nidogen 2	0007155 // cell adhesion // inferred from electronic annotation /// 0007160 // cell-matrix adhesion // inferred from direct assay /// 0007160 // cell-matrix adhesion // inferred from physical interaction /// 0007160 // cell-matrix adhesion // inferred from electronic annotation /// 0008218 // bioluminescence // inferred from electronic annotation /// 0018298 // protein-chromophore linkage // infe…	0005576 // extracellular region // inferred from electronic annotation /// 0005578 // proteinaceous extracellular matrix // inferred from direct assay /// 0005578 // proteinaceous extracellular matrix // inferred from electronic annotation /// 0005604 // basement membrane // inferred from direct assay /// 0005604 // basement membrane // inferred from physical interaction /// 0005604 // basement m…	0005509 // calcium ion binding // inferred from electronic annotation /// 0005515 // protein binding // inferred from physical interaction /// 0005515 // protein binding // inferred from electronic annotation	---	gb:BB781435 /DB_XREF=gi:16942135 /DB_XREF=BB781435 /CLONE=G430073G10 /FEA=FLmRNA /CNT=340 /TID=Mm.20348.2 /TIER=Stack /STK=13 /UG=Mm.20348 /LL=18074 /UG_GENE=Nid2 /UG_TITLE=nidogen 2 /FL=gb:AY074820.1 gb:NM_134085.1	-0.44412	0.31383	0.40606	-0.97806	-1.0232	-0.51095	-1.1656	-0.88958	-0.58974	-1.5634	-1.5095	-1.4998
1423566_a_at	Hsph1	heat shock 105kDa/110kDa protein 1	0006950 // response to stress // inferred from electronic annotation /// 0051085 // chaperone mediated protein folding requiring cofactor // inferred from direct assay	0005634 // nucleus // inferred from electronic annotation /// 0005737 // cytoplasm // inferred from electronic annotation	0000166 // nucleotide binding // inferred from electronic annotation /// 0005515 // protein binding // inferred from direct assay /// 0005524 // ATP binding // inferred from electronic annotation	---	gb:BI499717 /DB_XREF=gi:15339061 /DB_XREF=ie44h09.x1 /FEA=FLmRNA /CNT=201 /TID=Mm.34828.1 /TIER=Stack /STK=10 /UG=Mm.34828 /LL=15505 /UG_GENE=Hsp105 /UG_TITLE=heat shock protein, 105 kDa /FL=gb:BC018378.1 gb:D67016.1 gb:NM_013559.1 gb:L40406.1	-0.28474	-0.14688	-0.40079	-0.92311	-0.96617	-0.7271	-0.59277	-0.16215	-0.30606	-0.51594	-0.13455	-0.35887
1423584_at	Igfbp7	insulin-like growth factor binding protein 7	0001558 // regulation of cell growth // inferred from electronic annotation /// 0007155 // cell adhesion // inferred from electronic annotation /// 0007155 // cell adhesion // inferred from sequence or structural similarity /// 0007566 // embryo implantation // inferred from electronic annotation /// 0009408 // response to heat // inferred from electronic annotation /// 0014070 // response to org…	0005576 // extracellular region // inferred from electronic annotation /// 0005615 // extracellular space // inferred from electronic annotation	0005515 // protein binding // inferred from electronic annotation /// 0005520 // insulin-like growth factor binding // inferred from electronic annotation /// 0019838 // growth factor binding // inferred from electronic annotation	---	gb:AI790558 /DB_XREF=gi:5338274 /DB_XREF=ul02f09.x1 /CLONE=IMAGE:2064905 /FEA=FLmRNA /CNT=273 /TID=Mm.534.1 /TIER=Stack /STK=9 /UG=Mm.534 /LL=29817 /UG_GENE=Igfbp7 /UG_TITLE=insulin-like growth factor binding protein 7 /FL=gb:L75822.2 gb:AB012886.1 gb:NM_008048.1	0.18942	0.75273	0.89766	0.13006	0.023974	0.23118	-0.27898	-0.25037	-0.41666	-0.7458	-0.46265	-0.50761
1423594_a_at	Ednrb	endothelin receptor type B	0001755 // neural crest cell migration // inferred from mutant phenotype /// 0001934 // positive regulation of protein amino acid phosphorylation // inferred from electronic annotation /// 0006885 // regulation of pH // inferred from mutant phenotype /// 0007165 // signal transduction // inferred from electronic annotation /// 0007186 // G-protein coupled receptor protein signaling pathway // inf…	0005624 // membrane fraction // inferred from electronic annotation /// 0005886 // plasma membrane // inferred from electronic annotation /// 0016020 // membrane // inferred from electronic annotation /// 0016021 // integral to membrane // inferred from electronic annotation /// 0031965 // nuclear membrane // inferred from electronic annotation	0001600 // endothelin-B receptor activity // inferred from direct assay /// 0004871 // signal transducer activity // inferred from electronic annotation /// 0004872 // receptor activity // inferred from electronic annotation /// 0004930 // G-protein coupled receptor activity // inferred from electronic annotation /// 0004962 // endothelin receptor activity // inferred from mutant phenotype /// 00…	GPCRDB_Class_A_Rhodopsin-like // GenMAPP /// Peptide_GPCRs // GenMAPP /// Prostaglandin_synthesis_regulation // GenMAPP	gb:BB451714 /DB_XREF=gi:9312749 /DB_XREF=BB451714 /CLONE=D130012G17 /FEA=FLmRNA /CNT=67 /TID=Mm.2377.1 /TIER=Stack /STK=9 /UG=Mm.2377 /LL=13618 /UG_GENE=Ednrb /UG_TITLE=endothelin receptor type B /FL=gb:U32329.1 gb:NM_007904.1	-0.24125	0.22169	0.60855	-0.44911	-0.37457	-0.18382	-0.64111	-0.38214	-0.41146	-0.67906	-0.66818	-0.85366
1423626_at	Dst	dystonin	0007050 // cell cycle arrest // inferred from electronic annotation /// 0007155 // cell adhesion // inferred from electronic annotation /// 0007409 // axonogenesis // inferred from mutant phenotype /// 0008090 // retrograde axon cargo transport // inferred from mutant phenotype /// 0031110 // regulation of microtubule polymerization or depolymerization // inferred from mutant phenotype /// 003112…	0005737 // cytoplasm // inferred from electronic annotation /// 0005737 // cytoplasm // inferred from sequence or structural similarity /// 0005856 // cytoskeleton // inferred from electronic annotation /// 0015629 // actin cytoskeleton // inferred from direct assay /// 0015630 // microtubule cytoskeleton // inferred from direct assay /// 0016023 // cytoplasmic membrane-bounded vesicle // not rec…	0003779 // actin binding // inferred from electronic annotation /// 0005509 // calcium ion binding // inferred from electronic annotation /// 0005515 // protein binding // inferred from physical interaction /// 0005515 // protein binding // inferred from electronic annotation /// 0008017 // microtubule binding // inferred from direct assay	---	gb:BB150886 /DB_XREF=gi:16267904 /DB_XREF=BB150886 /CLONE=A030009P04 /FEA=FLmRNA /CNT=76 /TID=Mm.25326.3 /TIER=Stack /STK=8 /UG=Mm.25326 /LL=13518 /UG_GENE=Dst /UG_TITLE=dystonin /FL=gb:AF396878.1 gb:NM_133833.1	0.397	0.62904	0.60966	0.071826	-0.061358	0.066155	0.025865	0.16099	-0.28191	-0.56441	-0.24966	-0.51512
1423669_at	Col1a1	collagen, type I, alpha 1	0001501 // skeletal system development // inferred from mutant phenotype /// 0001501 // skeletal system development // not recorded /// 0001503 // ossification // inferred from electronic annotation /// 0001568 // blood vessel development // inferred from mutant phenotype /// 0001568 // blood vessel development // inferred from electronic annotation /// 0001649 // osteoblast differentiation // in…	0005576 // extracellular region // inferred from electronic annotation /// 0005578 // proteinaceous extracellular matrix // inferred from direct assay /// 0005578 // proteinaceous extracellular matrix // inferred from electronic annotation /// 0005581 // collagen // inferred from direct assay /// 0005581 // collagen // inferred from mutant phenotype /// 0005581 // collagen // inferred from electr…	0005201 // extracellular matrix structural constituent // inferred from direct assay /// 0005201 // extracellular matrix structural constituent // inferred from electronic annotation /// 0005515 // protein binding // inferred from physical interaction /// 0042802 // identical protein binding // inferred from electronic annotation /// 0048407 // platelet-derived growth factor binding // not record…	Inflammatory_Response_Pathway // GenMAPP	gb:U08020.1 /DB_XREF=gi:470673 /FEA=FLmRNA /CNT=592 /TID=Mm.22621.1 /TIER=FL+Stack /STK=173 /UG=Mm.22621 /LL=12842 /UG_GENE=Col1a1 /DEF=Mus musculus FVBN collagen pro-alpha-1 type I chain mRNA, complete cds. /PROD=collagen pro-alpha-1 type I chain /FL=gb:U08020.1	0.016767	0.44442	0.67242	-0.018411	-0.11143	-0.052073	-0.48078	-0.53934	-0.20429	-1.079	-0.60372	-0.89889
1423677_at	Fkbp9	FK506 binding protein 9	0006457 // protein folding // inferred from direct assay /// 0006457 // protein folding // inferred from electronic annotation	0005783 // endoplasmic reticulum // inferred from direct assay /// 0005783 // endoplasmic reticulum // inferred from electronic annotation /// 0005788 // endoplasmic reticulum lumen // inferred from electronic annotation	0003755 // peptidyl-prolyl cis-trans isomerase activity // inferred from electronic annotation /// 0005509 // calcium ion binding // inferred from direct assay /// 0005509 // calcium ion binding // inferred from electronic annotation /// 0016853 // isomerase activity // inferred from electronic annotation	---	gb:AF279263.1 /DB_XREF=gi:8778201 /FEA=FLmRNA /CNT=261 /TID=Mm.20943.1 /TIER=FL+Stack /STK=167 /UG=Mm.20943 /LL=27055 /UG_GENE=Fkbp9 /DEF=Mus musculus FKBP65RS mRNA, complete cds. /PROD=FKBP65RS /FL=gb:AF279263.1 gb:BC026133.1 gb:AF090334.1	-0.087564	0.24233	0.41362	-0.39096	-0.60741	-0.35239	-0.6753	-0.60237	-0.52222	-1.2607	-0.81426	-0.92965
1423771_at	Prkcdbp	protein kinase C, delta binding protein	---	---	0005080 // protein kinase C binding // inferred from electronic annotation /// 0005080 // protein kinase C binding // inferred from physical interaction	---	gb:BC009660.1 /DB_XREF=gi:16307145 /FEA=FLmRNA /CNT=159 /TID=Mm.3124.1 /TIER=FL+Stack /STK=117 /UG=Mm.3124 /LL=73128 /UG_GENE=3110015B12Rik /DEF=Mus musculus, clone MGC:6598 IMAGE:3486461, mRNA, complete cds. /PROD=Unknown (protein for MGC:6598) /FL=gb:BC009660.1	0.11958	0.60456	0.69406	-0.045963	-0.30399	0.0097485	-0.2975	-0.078117	-0.32161	-0.79135	-0.44721	-0.47002
1423835_at	Zfp503	zinc finger protein 503	0006350 // transcription // inferred from electronic annotation /// 0045449 // regulation of transcription // inferred from electronic annotation	0005622 // intracellular // inferred from electronic annotation /// 0005634 // nucleus // inferred from electronic annotation	0008270 // zinc ion binding // inferred from electronic annotation /// 0046872 // metal ion binding // inferred from electronic annotation	---	gb:BC018484.1 /DB_XREF=gi:17391142 /FEA=FLmRNA /CNT=161 /TID=Mm.21082.1 /TIER=FL+Stack /STK=95 /UG=Mm.21082 /DEF=Mus musculus, Similar to hypothetical protein MGC2555, clone MGC:29018 IMAGE:3481880, mRNA, complete cds. /PROD=Similar to hypothetical protein MGC2555 /FL=gb:BC018484.1	0.11145	0.57714	0.90522	-0.068991	-0.17677	0.029395	-0.37699	0.0023747	-0.083789	-0.87914	-0.48432	-0.74847
1423836_at	Zfp503	zinc finger protein 503	0006350 // transcription // inferred from electronic annotation /// 0045449 // regulation of transcription // inferred from electronic annotation	0005622 // intracellular // inferred from electronic annotation /// 0005634 // nucleus // inferred from electronic annotation	0008270 // zinc ion binding // inferred from electronic annotation /// 0046872 // metal ion binding // inferred from electronic annotation	---	gb:BB447914 /DB_XREF=gi:9290526 /DB_XREF=BB447914 /CLONE=D030063J02 /FEA=FLmRNA /CNT=161 /TID=Mm.21082.1 /TIER=Stack /STK=8 /UG=Mm.21082 /UG_TITLE=Mus musculus, Similar to hypothetical protein MGC2555, clone MGC:29018 IMAGE:3481880, mRNA, complete cds /FL=gb:BC018484.1	0.074202	0.30512	0.65999	-0.021773	-0.1951	-0.0036607	-0.25426	-0.25908	-0.28266	-0.57123	-0.53828	-0.61476
1423915_at	Olfml2b	olfactomedin-like 2B	0030198 // extracellular matrix organization // inferred from direct assay	0005576 // extracellular region // inferred from electronic annotation /// 0016020 // membrane // inferred from electronic annotation /// 0031012 // extracellular matrix // inferred from direct assay	0042803 // protein homodimerization activity // inferred from physical interaction /// 0050840 // extracellular matrix binding // inferred from direct assay	---	gb:BC025654.1 /DB_XREF=gi:19343912 /FEA=FLmRNA /CNT=105 /TID=Mm.25602.1 /TIER=FL+Stack /STK=80 /UG=Mm.25602 /DEF=Mus musculus, Similar to DKFZP586L151 protein, clone MGC:38296 IMAGE:5342879, mRNA, complete cds. /PROD=Similar to DKFZP586L151 protein /FL=gb:BC025654.1	-0.050499	0.31965	0.58605	-0.15598	-0.49602	-0.23977	-0.5075	-0.40078	-0.019571	-0.84611	-0.52044	-0.50166
1424007_at	Gdf10	growth differentiation factor 10	0030278 // regulation of ossification // inferred from electronic annotation	0005576 // extracellular region // inferred from electronic annotation /// 0005615 // extracellular space // inferred from electronic annotation	0005125 // cytokine activity // inferred from electronic annotation /// 0008083 // growth factor activity // inferred from electronic annotation	---	gb:L42114.1 /DB_XREF=gi:18654373 /GEN=GDF10 /FEA=FLmRNA /CNT=85 /TID=Mm.40323.1 /TIER=FL+Stack /STK=65 /UG=Mm.40323 /DEF=Mus musculus growthdifferentiation factor 10 (GDF10) mRNA, complete cds. /PROD=growthdifferentiation factor 10 /FL=gb:L42114.1	0.097196	-0.16047	0.42444	0.11215	-0.19369	-0.17981	-0.17666	-0.13564	-0.18211	-0.69803	-0.53189	-0.53742
1424050_s_at	Fgfr1	fibroblast growth factor receptor 1	0001525 // angiogenesis // inferred from genetic interaction /// 0001657 // ureteric bud development // inferred from genetic interaction /// 0001701 // in utero embryonic development // inferred from genetic interaction /// 0001759 // induction of an organ // inferred from mutant phenotype /// 0002053 // positive regulation of mesenchymal cell proliferation // inferred from genetic interaction /…	0016020 // membrane // inferred from electronic annotation /// 0016021 // integral to membrane // inferred from electronic annotation	0000166 // nucleotide binding // inferred from electronic annotation /// 0004672 // protein kinase activity // inferred from electronic annotation /// 0004713 // protein tyrosine kinase activity // inferred from electronic annotation /// 0004714 // transmembrane receptor protein tyrosine kinase activity // inferred from electronic annotation /// 0004872 // receptor activity // inferred from elect…	---	gb:M33760.1 /DB_XREF=gi:193298 /FEA=FLmRNA /CNT=193 /TID=Mm.3157.2 /TIER=FL+Stack /STK=58 /UG=Mm.3157 /LL=14182 /UG_GENE=Fgfr1 /UG_TITLE=fibroblast growth factor receptor 1 /DEF=Mouse FGF receptor mRNA, complete cds. /FL=gb:U23445.1 gb:M33760.1 gb:AF176552.1	0.054344	0.43162	0.65598	-0.1236	-0.38368	-0.28324	-0.54519	-0.32324	-0.55282	-0.9816	-0.75004	-0.77282
1424051_at	Col4a2	collagen, type IV, alpha 2	0016525 // negative regulation of angiogenesis // inferred from electronic annotation /// 0016525 // negative regulation of angiogenesis // inferred from sequence or structural similarity	0005576 // extracellular region // inferred from electronic annotation /// 0005578 // proteinaceous extracellular matrix // inferred from electronic annotation /// 0005581 // collagen // inferred from electronic annotation /// 0005587 // collagen type IV // inferred from direct assay /// 0005604 // basement membrane // inferred from direct assay /// 0005604 // basement membrane // inferred from e…	0005201 // extracellular matrix structural constituent // inferred from electronic annotation /// 0005488 // binding // inferred from electronic annotation	---	gb:BC013560.1 /DB_XREF=gi:15488859 /FEA=FLmRNA /CNT=215 /TID=Mm.181021.1 /TIER=FL+Stack /STK=58 /UG=Mm.181021 /LL=12827 /UG_GENE=Col4a2 /DEF=Mus musculus, clone MGC:7371 IMAGE:3487528, mRNA, complete cds. /PROD=Unknown (protein for MGC:7371) /FL=gb:BC013560.1 gb:J04695.1	0.24771	0.81096	0.95462	-0.063262	-0.53961	-0.10627	-0.39372	-0.22284	-0.37534	-0.81085	-0.41969	-0.68256
1424112_at	Igf2r	insulin-like growth factor 2 receptor	0006810 // transport // inferred from electronic annotation /// 0042981 // regulation of apoptosis // inferred from electronic annotation	0005624 // membrane fraction // inferred from direct assay /// 0005634 // nucleus // inferred from direct assay /// 0005641 // nuclear envelope lumen // inferred from direct assay /// 0005737 // cytoplasm // inferred from electronic annotation /// 0005764 // lysosome // inferred from electronic annotation /// 0005768 // endosome // not recorded /// 0005768 // endosome // inferred from electronic …	0001948 // glycoprotein binding // inferred from physical interaction /// 0001965 // G-protein alpha-subunit binding // inferred from electronic annotation /// 0004872 // receptor activity // inferred from electronic annotation /// 0005215 // transporter activity // inferred from electronic annotation /// 0005515 // protein binding // inferred from electronic annotation /// 0005520 // insulin-lik…	---	gb:BG092290 /DB_XREF=gi:12574842 /DB_XREF=mac07g10.x1 /CLONE=IMAGE:3999186 /FEA=FLmRNA /CNT=151 /TID=Mm.2938.1 /TIER=Stack /STK=9 /UG=Mm.2938 /LL=16004 /UG_GENE=Igf2r /UG_TITLE=insulin-like growth factor 2 receptor /FL=gb:U04710.1	-0.068781	0.61171	0.71797	-0.17133	-0.17437	0.016953	-0.40306	-0.27888	-0.18424	-0.54007	-0.39862	-0.3409
1424123_at	Mfsd7c	major facilitator superfamily domain containing 7C	0006810 // transport // inferred from electronic annotation /// 0055085 // transmembrane transport // inferred from electronic annotation	0005886 // plasma membrane // inferred from electronic annotation /// 0016020 // membrane // inferred from electronic annotation /// 0016021 // integral to membrane // inferred from electronic annotation	---	---	gb:BC011209.1 /DB_XREF=gi:15029953 /FEA=FLmRNA /CNT=70 /TID=Mm.18109.1 /TIER=FL+Stack /STK=52 /UG=Mm.18109 /DEF=Mus musculus, clone MGC:19050 IMAGE:4190027, mRNA, complete cds. /PROD=Unknown (protein for MGC:19050) /FL=gb:BC011209.1	-0.2407	0.012094	0.24653	-0.34094	-0.30453	-0.33247	-0.56652	-0.30225	-0.2662	-0.79025	-0.60732	-0.69307
1424186_at	Ccdc80	coiled-coil domain containing 80	0010811 // positive regulation of cell-substrate adhesion // inferred from direct assay /// 0030198 // extracellular matrix organization // inferred from direct assay	0005576 // extracellular region // inferred from electronic annotation /// 0005578 // proteinaceous extracellular matrix // inferred from electronic annotation /// 0005604 // basement membrane // inferred from direct assay /// 0005614 // interstitial matrix // inferred from direct assay /// 0031012 // extracellular matrix // inferred from direct assay /// 0043231 // intracellular membrane-bounded…	0001968 // fibronectin binding // inferred from direct assay /// 0005539 // glycosaminoglycan binding // inferred from direct assay /// 0008201 // heparin binding // inferred from direct assay	---	gb:AB075019.1 /DB_XREF=gi:18958360 /GEN=urb /FEA=FLmRNA /CNT=132 /TID=Mm.181074.1 /TIER=FL+Stack /STK=46 /UG=Mm.181074 /LL=67896 /DEF=Mus musculus mRNA for URB, complete cds. /PROD=URB /FL=gb:AB075019.1	-0.11634	0.28633	0.71413	-0.19122	-0.4145	-0.29153	-0.63348	-0.57736	-0.44374	-1.1899	-0.96343	-1.0465
1424234_s_at	Meox2	mesenchyme homeobox 2	0001525 // angiogenesis // inferred from mutant phenotype /// 0001757 // somite specification // inferred from genetic interaction /// 0006355 // regulation of transcription, DNA-dependent // inferred from electronic annotation /// 0007275 // multicellular organismal development // inferred from electronic annotation /// 0007519 // skeletal muscle tissue development // inferred from mutant phenot…	0005634 // nucleus // inferred from electronic annotation /// 0005737 // cytoplasm // inferred from electronic annotation	0003677 // DNA binding // inferred from electronic annotation /// 0003700 // transcription factor activity // inferred from electronic annotation /// 0005515 // protein binding // inferred from electronic annotation /// 0030528 // transcription regulator activity // inferred from electronic annotation /// 0043565 // sequence-specific DNA binding // not recorded /// 0043565 // sequence-specific DN…	---	gb:BC002076.1 /DB_XREF=gi:12805230 /FEA=FLmRNA /CNT=66 /TID=Mm.153716.1 /TIER=FL+Stack /STK=44 /UG=Mm.153716 /LL=17286 /UG_GENE=Meox2 /DEF=Mus musculus, Similar to mesenchyme homeobox 2, clone MGC:6225 IMAGE:3591924, mRNA, complete cds. /PROD=Similar to mesenchyme homeobox 2 /FL=gb:BC002076.1	0.42408	0.68835	0.99755	0.089546	-0.20132	0.13013	-0.10659	0.25492	-0.12181	-0.74703	-0.28373	-0.34125
1424264_at	Med6	mediator of RNA polymerase II transcription, subunit 6 homolog (yeast)	0006350 // transcription // inferred from electronic annotation /// 0006357 // regulation of transcription from RNA polymerase II promoter // inferred from electronic annotation /// 0045449 // regulation of transcription // inferred from electronic annotation /// 0045944 // positive regulation of transcription from RNA polymerase II promoter // not recorded	0005634 // nucleus // inferred from direct assay /// 0005634 // nucleus // inferred from electronic annotation /// 0016592 // mediator complex // not recorded /// 0016592 // mediator complex // inferred from electronic annotation	0003677 // DNA binding // inferred from direct assay /// 0003713 // transcription coactivator activity // not recorded /// 0005515 // protein binding // inferred from physical interaction /// 0016455 // RNA polymerase II transcription mediator activity // inferred from electronic annotation	---	gb:BC013096.1 /DB_XREF=gi:15341838 /FEA=FLmRNA /CNT=62 /TID=Mm.28582.1 /TIER=FL+Stack /STK=42 /UG=Mm.28582 /LL=69792 /UG_GENE=1500012F11Rik /DEF=Mus musculus, clone MGC:12137 IMAGE:3710612, mRNA, complete cds. /PROD=Unknown (protein for MGC:12137) /FL=gb:BC013096.1	0.011764	0.099886	0.3662	-0.07226	-0.36713	-0.23755	-0.38986	-0.50121	-0.1053	-0.72766	-0.39891	-0.58285
1424271_at	Dclk1	doublecortin-like kinase 1	0001764 // neuron migration // inferred from genetic interaction /// 0006468 // protein amino acid phosphorylation // inferred from electronic annotation /// 0007242 // intracellular signaling cascade // inferred from electronic annotation /// 0007275 // multicellular organismal development // inferred from electronic annotation /// 0007399 // nervous system development // inferred from electroni…	---	0000166 // nucleotide binding // inferred from electronic annotation /// 0004672 // protein kinase activity // inferred from electronic annotation /// 0004674 // protein serine/threonine kinase activity // inferred from electronic annotation /// 0005524 // ATP binding // inferred from electronic annotation /// 0016301 // kinase activity // inferred from electronic annotation /// 0016740 // transf…	---	gb:BQ174827 /DB_XREF=gi:20350319 /DB_XREF=UI-M-DJ2-bwb-l-09-0-UI.s1 /CLONE=UI-M-DJ2-bwb-l-09-0-UI /FEA=FLmRNA /CNT=197 /TID=Mm.44752.2 /TIER=Stack /STK=18 /UG=Mm.44752 /LL=13175 /UG_GENE=Dcamkl1 /UG_TITLE=double cortin and calciumcalmodulin-dependent protein kinase-like 1 /FL=gb:BC021354.1	0.51495	1.5198	1.2141	0.11042	-0.14208	0.24177	-0.34487	-0.028761	-0.13174	-0.34695	-0.11198	-0.33866
1424305_at	Igj	immunoglobulin joining chain	0006959 // humoral immune response // inferred from sequence or structural similarity	---	0003823 // antigen binding // inferred from sequence or structural similarity	---	gb:BC006026.1 /DB_XREF=gi:13543747 /FEA=FLmRNA /CNT=129 /TID=Mm.1192.1 /TIER=FL+Stack /STK=38 /UG=Mm.1192 /LL=16069 /UG_GENE=Igj /DEF=Mus musculus, Similar to immunoglobulin joining chain, clone MGC:6626 IMAGE:3491646, mRNA, complete cds. /PROD=Similar to immunoglobulin joining chain /FL=gb:M90766.1 gb:BC006026.1	0.61477	0.50943	0.003413	1.4172	1.0317	1.1557	1.2334	1.1158	1.168	1.5032	1.4256	1.3719
1424382_at	Rcn3	reticulocalbin 3, EF-hand calcium binding domain	---	0005783 // endoplasmic reticulum // inferred from electronic annotation /// 0005788 // endoplasmic reticulum lumen // inferred from electronic annotation	0005509 // calcium ion binding // inferred from electronic annotation /// 0005515 // protein binding // inferred from electronic annotation	---	gb:BC025602.1 /DB_XREF=gi:19343897 /FEA=FLmRNA /CNT=77 /TID=Mm.29997.1 /TIER=FL+Stack /STK=35 /UG=Mm.29997 /LL=68096 /UG_GENE=6030455P07Rik /DEF=Mus musculus, Similar to hypothetical protein LOC57333, clone MGC:36253 IMAGE:5250505, mRNA, complete cds. /PROD=Similar to hypothetical protein LOC57333 /FL=gb:BC025602.1	-0.15979	0.19026	0.54475	-0.24796	-0.57592	-0.30264	-0.64064	-0.61694	-0.35874	-1.0778	-0.52381	-0.76932
1424393_s_at	Adhfe1	alcohol dehydrogenase, iron containing, 1	0015993 // molecular hydrogen transport // inferred from electronic annotation /// 0015993 // molecular hydrogen transport // inferred from sequence or structural similarity /// 0055114 // oxidation reduction // inferred from electronic annotation	0005739 // mitochondrion // inferred from direct assay /// 0005739 // mitochondrion // inferred from electronic annotation	0016491 // oxidoreductase activity // inferred from electronic annotation /// 0046872 // metal ion binding // inferred from electronic annotation /// 0047988 // hydroxyacid-oxoacid transhydrogenase activity // inferred from electronic annotation /// 0047988 // hydroxyacid-oxoacid transhydrogenase activity // inferred from sequence or structural similarity	---	gb:BC026584.1 /DB_XREF=gi:20072015 /FEA=FLmRNA /CNT=93 /TID=Mm.28514.1 /TIER=FL+Stack /STK=34 /UG=Mm.28514 /LL=76187 /UG_GENE=6330565B14Rik /DEF=Mus musculus, clone MGC:37234 IMAGE:4972323, mRNA, complete cds. /PROD=Unknown (protein for MGC:37234) /FL=gb:BC026584.1	-0.74465	-0.77803	-0.29331	-0.91556	-0.75842	-0.6238	-0.718	-0.81861	-0.58733	-1.1575	-0.8382	-1.3606
1424410_at	Ttc8	tetratricopeptide repeat domain 8	0030030 // cell projection organization // inferred from electronic annotation /// 0045444 // fat cell differentiation // inferred from expression pattern	0005737 // cytoplasm // inferred from electronic annotation /// 0005814 // centriole // inferred from electronic annotation /// 0005886 // plasma membrane // inferred from electronic annotation /// 0005929 // cilium // inferred from electronic annotation /// 0016020 // membrane // inferred from electronic annotation /// 0032391 // photoreceptor connecting cilium // inferred from direct assay /// …	0005488 // binding // inferred from electronic annotation	---	gb:BC017523.1 /DB_XREF=gi:17028413 /FEA=FLmRNA /CNT=63 /TID=Mm.32328.1 /TIER=FL+Stack /STK=34 /UG=Mm.32328 /LL=76260 /UG_GENE=0610012F22Rik /DEF=Mus musculus, Similar to RIKEN cDNA 0610012F22 gene, clone MGC:27659 IMAGE:4527657, mRNA, complete cds. /PROD=Similar to RIKEN cDNA 0610012F22 gene /FL=gb:BC017523.1	0.023519	0.37055	0.29978	-0.28088	-0.29125	0.063592	-0.33159	-0.0061523	-0.49836	-0.63819	-0.52192	-0.6309
1424659_at	Slit2	slit homolog 2 (Drosophila)	0001656 // metanephros development // inferred from mutant phenotype /// 0001657 // ureteric bud development // inferred from electronic annotation /// 0006935 // chemotaxis // inferred from electronic annotation /// 0007275 // multicellular organismal development // inferred from electronic annotation /// 0007399 // nervous system development // inferred from electronic annotation /// 0007411 //…	0005576 // extracellular region // inferred from electronic annotation /// 0005615 // extracellular space // inferred from direct assay	0005102 // receptor binding // traceable author statement /// 0005509 // calcium ion binding // inferred from electronic annotation /// 0005515 // protein binding // inferred from electronic annotation	---	gb:AF144628.1 /DB_XREF=gi:5532494 /GEN=Slit2 /FEA=FLmRNA /CNT=50 /TID=Mm.34584.1 /TIER=FL+Stack /STK=21 /UG=Mm.34584 /LL=20563 /DEF=Mus musculus SLIT2 (Slit2) mRNA, complete cds. /PROD=SLIT2 /FL=gb:AF144628.1	-0.27237	-0.11525	0.39316	-0.19778	-0.27595	-0.41908	-0.43548	-0.28464	-0.52438	-0.62495	-0.60224	-0.60255
1424838_at	A330049M08Rik	RIKEN cDNA A330049M08 gene	---	0016020 // membrane // inferred from electronic annotation /// 0016021 // integral to membrane // inferred from electronic annotation	---	---	gb:BC005730.1 /DB_XREF=gi:13543103 /FEA=FLmRNA /CNT=22 /TID=Mm.35548.1 /TIER=FL+Stack /STK=14 /UG=Mm.35548 /DEF=Mus musculus, clone MGC:11811 IMAGE:3595770, mRNA, complete cds. /PROD=Unknown (protein for MGC:11811) /FL=gb:BC005730.1	-0.2295	-0.39808	-0.12446	-0.48923	-0.6437	-0.68701	-0.57556	-0.58564	-0.43366	-0.92597	-0.87891	-0.82048
1424848_at	Kcnma1	potassium large conductance calcium-activated channel, subfamily M, alpha member 1	0001666 // response to hypoxia // inferred from direct assay /// 0001666 // response to hypoxia // inferred from electronic annotation /// 0006810 // transport // inferred from electronic annotation /// 0006811 // ion transport // inferred from electronic annotation /// 0006813 // potassium ion transport // inferred from direct assay /// 0006813 // potassium ion transport // inferred from electro…	0005783 // endoplasmic reticulum // inferred from direct assay /// 0005886 // plasma membrane // inferred from direct assay /// 0005901 // caveola // inferred from electronic annotation /// 0008076 // voltage-gated potassium channel complex // inferred from genetic interaction /// 0008076 // voltage-gated potassium channel complex // inferred from electronic annotation /// 0009897 // external sid…	0000287 // magnesium ion binding // inferred from electronic annotation /// 0003779 // actin binding // inferred from electronic annotation /// 0003824 // catalytic activity // inferred from electronic annotation /// 0005216 // ion channel activity // inferred from electronic annotation /// 0005244 // voltage-gated ion channel activity // inferred from electronic annotation /// 0005249 // voltage…	---	gb:AV356961 /DB_XREF=gi:6403963 /DB_XREF=AV356961 /CLONE=7330444E07 /FEA=FLmRNA /CNT=22 /TID=Mm.4123.2 /TIER=ConsEnd /STK=1 /UG=Mm.4123 /LL=16531 /UG_GENE=Kcnma1 /UG_TITLE=potassium large conductance calcium-activated channel, subfamily M, alpha member 1 /FL=gb:U09383.1	-0.085821	0.070213	0.59981	-0.36854	-0.6685	-0.30145	-0.51357	-0.13203	-0.19366	-0.69571	-0.73852	-0.83533
1425272_at	Emp2	epithelial membrane protein 2	---	0016020 // membrane // inferred from electronic annotation /// 0016021 // integral to membrane // inferred from electronic annotation	---	---	gb:AF083876.1 /DB_XREF=gi:3462841 /GEN=Xmp /FEA=FLmRNA /CNT=43 /TID=Mm.220873.1 /TIER=FL /STK=3 /UG=Mm.220873 /DEF=Mus musculus XMP (Xmp) mRNA, complete cds. /PROD=XMP /FL=gb:AF346627.1 gb:AF083876.1	-0.049853	0.22953	0.49628	-0.23257	-0.48144	-0.057274	-0.40111	-0.19432	-0.42743	-0.73992	-0.62743	-0.6228
1425284_a_at	Rab27a	RAB27A, member RAS oncogene family	0006605 // protein targeting // inferred from mutant phenotype /// 0006887 // exocytosis // inferred from electronic annotation /// 0007264 // small GTPase mediated signal transduction // inferred from electronic annotation /// 0007596 // blood coagulation // inferred from mutant phenotype /// 0015031 // protein transport // inferred from electronic annotation /// 0016192 // vesicle-mediated tran…	0001750 // photoreceptor outer segment // inferred from direct assay /// 0005622 // intracellular // inferred from sequence or structural similarity /// 0005764 // lysosome // inferred from electronic annotation /// 0005768 // endosome // inferred from electronic annotation /// 0005770 // late endosome // inferred from electronic annotation /// 0005794 // Golgi apparatus // inferred from direct a…	0000166 // nucleotide binding // inferred from electronic annotation /// 0003924 // GTPase activity // inferred from sequence or structural similarity /// 0005515 // protein binding // inferred from physical interaction /// 0005515 // protein binding // inferred from electronic annotation /// 0005525 // GTP binding // inferred from electronic annotation /// 0031489 // myosin V binding // inferred…	---	gb:BC009656.1 /DB_XREF=gi:16307137 /FEA=FLmRNA /CNT=11 /TID=Mm.34867.2 /TIER=FL /STK=3 /UG=Mm.34867 /LL=11891 /UG_GENE=Rab27a /DEF=Mus musculus, RAB27A, member RAS oncogene family, clone MGC:6415 IMAGE:3590089, mRNA, complete cds. /PROD=RAB27A, member RAS oncogene family /FL=gb:BC009656.1 gb:AB046693.1	-0.51195	-0.62562	-0.42391	-0.74035	-0.65364	-0.030794	-0.31858	0.18128	0.54876	-0.26438	-0.17005	-0.19345
1425582_a_at	Emcn	endomucin	0001525 // angiogenesis // inferred from sequence or structural similarity /// 0016337 // cell-cell adhesion // inferred from sequence or structural similarity /// 0030155 // regulation of cell adhesion // inferred from sequence or structural similarity	0005886 // plasma membrane // inferred from sequence or structural similarity /// 0016020 // membrane // inferred from electronic annotation /// 0016021 // integral to membrane // not recorded /// 0016021 // integral to membrane // traceable author statement /// 0016021 // integral to membrane // inferred from electronic annotation	0030246 // carbohydrate binding // inferred from sequence or structural similarity	---	gb:AB034693.1 /DB_XREF=gi:6252431 /FEA=FLmRNA /CNT=18 /TID=Mm.27343.2 /TIER=FL /STK=1 /UG=Mm.27343 /LL=59308 /UG_GENE=Emcn-pending /DEF=Mus musculus mRNA for endomucin-1, complete cds. /PROD=endomucin-1 /FL=gb:BC003706.1 gb:AB034693.1	-0.25225	0.026272	0.49447	-0.65239	-0.53532	-0.27372	-0.49849	-0.30801	-0.34062	-0.8901	-0.58454	-0.68672
1425658_at	Cd109	CD109 antigen	---	0005576 // extracellular region // inferred from electronic annotation /// 0005615 // extracellular space // inferred from electronic annotation /// 0005886 // plasma membrane // inferred from electronic annotation /// 0016020 // membrane // inferred from electronic annotation /// 0031225 // anchored to membrane // inferred from electronic annotation	0004866 // endopeptidase inhibitor activity // inferred from electronic annotation /// 0004867 // serine-type endopeptidase inhibitor activity // inferred from electronic annotation /// 0005515 // protein binding // inferred from electronic annotation /// 0030414 // peptidase inhibitor activity // inferred from electronic annotation	---	gb:AY083458.1 /DB_XREF=gi:20070079 /FEA=FLmRNA /CNT=19 /TID=Mm.32955.1 /TIER=FL /STK=1 /UG=Mm.32955 /DEF=Mus musculus GPI-anchored alpha-2 macroglobulin-related protein mRNA, complete cds. /PROD=GPI-anchored alpha-2 macroglobulin-relatedprotein /FL=gb:AY083458.1	-0.35122	-0.020727	0.38576	-0.65806	-0.67918	-0.44523	-0.83132	-0.43885	-0.71756	-1.3578	-1.042	-1.1154
1425701_a_at	Rgs3	regulator of G-protein signaling 3	0007186 // G-protein coupled receptor protein signaling pathway // traceable author statement /// 0009968 // negative regulation of signal transduction // inferred from electronic annotation	0005634 // nucleus // inferred from direct assay /// 0005634 // nucleus // inferred from electronic annotation /// 0005737 // cytoplasm // traceable author statement /// 0005737 // cytoplasm // inferred from electronic annotation /// 0005886 // plasma membrane // traceable author statement /// 0005886 // plasma membrane // inferred from electronic annotation /// 0016020 // membrane // inferred fr…	0004871 // signal transducer activity // inferred from electronic annotation /// 0005096 // GTPase activator activity // traceable author statement /// 0005515 // protein binding // inferred from electronic annotation	Calcium_regulation_in_cardiac_cells // GenMAPP /// Smooth_muscle_contraction // GenMAPP	gb:AF350047.1 /DB_XREF=gi:13774476 /FEA=FLmRNA /CNT=10 /TID=Mm.17554.3 /TIER=FL /STK=1 /UG=Mm.17554 /LL=50780 /UG_GENE=Rgs3 /DEF=Mus musculus PDZ-RGS3 protein mRNA, complete cds. /PROD=PDZ-RGS3 protein /FL=gb:AF350047.1	-0.17879	-0.23286	0.17725	-0.42862	-0.48378	-0.27085	-0.48852	-0.51978	-0.36252	-0.71066	-0.65524	-0.67532
1426208_x_at	Plagl1	pleiomorphic adenoma gene-like 1	0045944 // positive regulation of transcription from RNA polymerase II promoter // not recorded /// 0045944 // positive regulation of transcription from RNA polymerase II promoter // inferred from electronic annotation	0005622 // intracellular // inferred from electronic annotation	0003676 // nucleic acid binding // inferred from electronic annotation /// 0003677 // DNA binding // not recorded /// 0003677 // DNA binding // inferred from electronic annotation /// 0005515 // protein binding // inferred from physical interaction /// 0008270 // zinc ion binding // inferred from electronic annotation	---	gb:AF147785.1 /DB_XREF=gi:6978025 /GEN=Zac1 /FEA=FLmRNA /CNT=92 /TID=Mm.220978.3 /TIER=FL+Stack /STK=75 /UG=Mm.220978 /LL=22634 /DEF=Mus musculus zinc finger protein ZAC1 (Zac1) mRNA, complete cds, alternatively spliced. /PROD=zinc finger protein ZAC1 /FL=gb:AF147785.1	-0.22695	0.46089	0.19564	-0.40599	-0.69991	-0.67976	-0.76518	-0.75734	-0.54956	-1.0809	-1.3211	-1.2027
1426238_at	Bmp1	bone morphogenetic protein 1	0001503 // ossification // inferred from electronic annotation /// 0006508 // proteolysis // inferred from electronic annotation /// 0007275 // multicellular organismal development // inferred from electronic annotation /// 0030154 // cell differentiation // inferred from electronic annotation /// 0051216 // cartilage development // inferred from electronic annotation	0005615 // extracellular space // inferred from electronic annotation /// 0031988 // membrane-bounded vesicle // inferred from electronic annotation	0004222 // metalloendopeptidase activity // traceable author statement /// 0004222 // metalloendopeptidase activity // inferred from electronic annotation /// 0005125 // cytokine activity // inferred from electronic annotation /// 0005509 // calcium ion binding // inferred from electronic annotation /// 0008083 // growth factor activity // inferred from electronic annotation /// 0008233 // peptid…	---	gb:L24755.1 /DB_XREF=gi:439606 /GEN=Bmp-1 /FEA=FLmRNA /CNT=91 /TID=Mm.27757.1 /TIER=FL+Stack /STK=29 /UG=Mm.27757 /LL=12153 /DEF=Mus musculus bone morphogenetic protein (Bmp-1) mRNA, complete cds. /PROD=bone morphogenetic protein /FL=gb:L24755.1	0.1728	0.61053	0.78972	0.035819	-0.28632	-0.16056	-0.29455	-0.36009	-0.36209	-0.67888	-0.39202	-0.44663
1426348_at	Col4a1	collagen, type IV, alpha 1	---	0005576 // extracellular region // inferred from electronic annotation /// 0005578 // proteinaceous extracellular matrix // inferred from electronic annotation /// 0005581 // collagen // inferred from electronic annotation /// 0005587 // collagen type IV // inferred from direct assay /// 0005604 // basement membrane // inferred from direct assay /// 0005604 // basement membrane // inferred from e…	0005201 // extracellular matrix structural constituent // inferred from electronic annotation /// 0005488 // binding // inferred from electronic annotation /// 0048407 // platelet-derived growth factor binding // not recorded	---	gb:AW536690 /DB_XREF=gi:7179107 /DB_XREF=G0107F04-3 /CLONE=G0107F04 /FEA=FLmRNA /CNT=478 /TID=Mm.738.1 /TIER=Stack /STK=22 /UG=Mm.738 /LL=12826 /UG_GENE=Col4a1 /UG_TITLE=procollagen, type IV, alpha 1 /FL=gb:J04694.1	0.0033607	0.54188	0.89419	-0.075136	-0.20067	-0.16044	-0.3929	-0.19483	-0.33209	-0.74636	-0.41771	-0.58355
1426427_at	Ttll1	tubulin tyrosine ligase-like 1	0006464 // protein modification process // inferred from electronic annotation	0005737 // cytoplasm // inferred from electronic annotation /// 0005856 // cytoskeleton // inferred from electronic annotation /// 0005874 // microtubule // inferred from electronic annotation	0004835 // tubulin-tyrosine ligase activity // inferred from electronic annotation /// 0016874 // ligase activity // inferred from electronic annotation	---	gb:BB764137 /DB_XREF=gi:16208531 /DB_XREF=BB764137 /CLONE=G370033B05 /FEA=FLmRNA /CNT=59 /TID=Mm.74226.1 /TIER=Stack /STK=22 /UG=Mm.74226 /UG_TITLE=Mus musculus, Similar to tubulin tyrosine ligase-like 1, clone MGC:19055 IMAGE:4191464, mRNA, complete cds /FL=gb:BC010510.1	-0.24054	0.1022	0.70824	-0.46649	-0.43396	-0.42655	-0.50301	-0.39639	-0.5754	-0.86378	-0.56876	-0.77933
1426642_at	Fn1	fibronectin 1	0006916 // anti-apoptosis // inferred from electronic annotation /// 0006953 // acute-phase response // inferred from electronic annotation /// 0007044 // cell-substrate junction assembly // inferred from direct assay /// 0007155 // cell adhesion // inferred from direct assay /// 0007155 // cell adhesion // inferred from electronic annotation /// 0007160 // cell-matrix adhesion // inferred from d…	0005576 // extracellular region // inferred from electronic annotation /// 0005578 // proteinaceous extracellular matrix // inferred from direct assay /// 0005578 // proteinaceous extracellular matrix // traceable author statement /// 0005578 // proteinaceous extracellular matrix // inferred from electronic annotation /// 0005604 // basement membrane // inferred from direct assay /// 0005604 // b…	0002020 // protease binding // inferred from electronic annotation /// 0005515 // protein binding // inferred from electronic annotation /// 0005515 // protein binding // inferred from physical interaction /// 0008201 // heparin binding // inferred from electronic annotation /// 0016504 // peptidase activator activity // inferred from direct assay /// 0045340 // mercury ion binding // inferred fr…	Inflammatory_Response_Pathway // GenMAPP	gb:BC004724.1 /DB_XREF=gi:13435722 /FEA=mRNA /CNT=530 /TID=Mm.193099.1 /TIER=Stack /STK=239 /UG=Mm.193099 /LL=14268 /UG_GENE=Fn1 /DEF=Mus musculus, clone IMAGE:3582768, mRNA, partial cds. /PROD=Unknown (protein for IMAGE:3582768)	0.13151	0.61999	0.79296	0.15177	-0.077927	0.27312	-0.29179	-0.13061	-0.27712	-0.64783	-0.3891	-0.24047
1426782_at	Gpr125	G protein-coupled receptor 125	0007165 // signal transduction // inferred from electronic annotation /// 0007166 // cell surface receptor linked signal transduction // inferred from electronic annotation /// 0007186 // G-protein coupled receptor protein signaling pathway // inferred from electronic annotation /// 0007218 // neuropeptide signaling pathway // inferred from electronic annotation	0005886 // plasma membrane // inferred from electronic annotation /// 0009897 // external side of plasma membrane // inferred from direct assay /// 0016020 // membrane // inferred from electronic annotation /// 0016021 // integral to membrane // inferred from electronic annotation	0004871 // signal transducer activity // inferred from electronic annotation /// 0004872 // receptor activity // inferred from electronic annotation /// 0004888 // transmembrane receptor activity // inferred from electronic annotation /// 0004930 // G-protein coupled receptor activity // inferred from electronic annotation /// 0005515 // protein binding // inferred from electronic annotation	---	gb:BC019649.1 /DB_XREF=gi:18044315 /FEA=mRNA /CNT=100 /TID=Mm.18062.1 /TIER=Stack /STK=68 /UG=Mm.18062 /LL=100857 /UG_GENE=AU044632 /DEF=Mus musculus, clone IMAGE:3994416, mRNA, partial cds. /PROD=Unknown (protein for IMAGE:3994416)	-0.18631	0.15685	0.55319	-0.40639	-0.78266	-0.40138	-0.65635	-0.37107	-0.35528	-1.1907	-0.78476	-0.854
1427019_at	Ptprz1	protein tyrosine phosphatase, receptor type Z, polypeptide 1	0006470 // protein amino acid dephosphorylation // inferred from electronic annotation /// 0007409 // axonogenesis // inferred from direct assay /// 0016311 // dephosphorylation // inferred from electronic annotation	0005578 // proteinaceous extracellular matrix // inferred from direct assay	0004725 // protein tyrosine phosphatase activity // inferred from electronic annotation /// 0004872 // receptor activity // inferred from electronic annotation /// 0005515 // protein binding // inferred from physical interaction /// 0005515 // protein binding // inferred from electronic annotation /// 0016787 // hydrolase activity // inferred from electronic annotation /// 0016791 // phosphatase …	---	gb:AI849305 /DB_XREF=gi:5493211 /DB_XREF=UI-M-AJ1-aha-b-10-0-UI.s1 /CLONE=UI-M-AJ1-aha-b-10-0-UI /FEA=mRNA /CNT=48 /TID=Mm.41639.1 /TIER=Stack /STK=8 /UG=Mm.41639 /UG_TITLE=Mus musculus, clone IMAGE:3590815, mRNA, partial cds	-0.28907	-0.036873	0.25524	-0.26723	-0.16749	-0.20352	-0.58836	-0.26951	-0.30743	-0.98829	-0.76837	-0.83554
1427020_at	Scara3	scavenger receptor class A, member 3	---	0005783 // endoplasmic reticulum // inferred from electronic annotation /// 0005794 // Golgi apparatus // inferred from electronic annotation /// 0016020 // membrane // inferred from electronic annotation /// 0016021 // integral to membrane // inferred from electronic annotation	---	---	gb:BC026446.1 /DB_XREF=gi:20072299 /FEA=mRNA /CNT=38 /TID=Mm.44135.1 /TIER=Stack /STK=25 /UG=Mm.44135 /DEF=Mus musculus, clone IMAGE:4459572, mRNA, partial cds. /PROD=Unknown (protein for IMAGE:4459572)	0.033802	0.44133	0.72929	0.17373	-0.14172	0.11552	-0.29059	0.007778	-0.51387	-0.79506	-0.61864	-0.47465
1427035_at	Slc39a14	solute carrier family 39 (zinc transporter), member 14	0006810 // transport // inferred from electronic annotation /// 0006811 // ion transport // inferred from electronic annotation /// 0006826 // iron ion transport // inferred from direct assay /// 0006829 // zinc ion transport // inferred from direct assay /// 0006829 // zinc ion transport // inferred from electronic annotation /// 0030001 // metal ion transport // inferred from electronic annotat…	0005737 // cytoplasm // inferred from electronic annotation /// 0005794 // Golgi apparatus // inferred from electronic annotation /// 0005886 // plasma membrane // inferred from direct assay /// 0005886 // plasma membrane // inferred from electronic annotation /// 0016020 // membrane // inferred from electronic annotation /// 0016021 // integral to membrane // inferred from electronic annotation	0005385 // zinc ion transmembrane transporter activity // inferred from direct assay /// 0008270 // zinc ion binding // inferred from electronic annotation /// 0015093 // ferrous iron transmembrane transporter activity // inferred from direct assay /// 0046873 // metal ion transmembrane transporter activity // inferred from electronic annotation	---	gb:BB399837 /DB_XREF=gi:16413385 /DB_XREF=BB399837 /CLONE=C330015P15 /FEA=mRNA /CNT=42 /TID=Mm.28937.1 /TIER=Stack /STK=23 /UG=Mm.28937 /UG_TITLE=Mus musculus, clone IMAGE:3995747, mRNA, partial cds	0.064942	1.1858	0.79907	-0.27555	-0.50005	-0.12648	-0.67368	-0.3873	-0.39481	-0.81186	-0.55102	-0.75574
1427167_at	Armcx4	armadillo repeat containing, X-linked 4	---	---	0005488 // binding // inferred from electronic annotation	---	gb:BE865094 /DB_XREF=gi:10386794 /DB_XREF=UI-M-BH2.1-apn-e-10-0-UI.r1 /CLONE=UI-M-BH2.1-apn-e-10-0-UI /FEA=mRNA /CNT=23 /TID=Mm.31961.1 /TIER=Stack /STK=12 /UG=Mm.31961 /UG_TITLE=Mus musculus, Similar to RIKEN cDNA 1200004E24 gene, clone IMAGE:5028212, mRNA, partial cds	-0.00315	0.23009	0.4871	-0.43398	-0.56439	-0.27721	-0.4585	-0.14284	0.036822	-0.66483	-0.44464	-0.71113
1427195_at	---	---	---	---	---	---	gb:W91587 /DB_XREF=gi:1407860 /DB_XREF=MTA.C08.092.A /CLONE=MTA.C08.092 /FEA=mRNA /CNT=20 /TID=Mm.100628.1 /TIER=Stack /STK=10 /UG=Mm.100628 /UG_TITLE=Mus musculus, clone IMAGE:3983419, mRNA	-0.27211	-0.30985	0.18854	-0.51163	-0.99699	-0.62107	-0.53114	-0.32358	-0.2944	-0.70386	-0.61721	-0.62935
1427278_at	Clip4	CAP-GLY domain containing linker protein family, member 4	---	---	---	---	gb:AK017914.1 /DB_XREF=gi:12857407 /FEA=mRNA /CNT=49 /TID=Mm.196382.1 /TIER=Stack /STK=15 /UG=Mm.196382 /LL=78785 /UG_GENE=4833417L20Rik /UG_TITLE=RIKEN cDNA 4833417L20 gene /DEF=Mus musculus adult male thymus cDNA, RIKEN full-length enriched library, clone:5830409B12:CAP-Gly domain containing protein, full insert sequence.	1.087	1.2782	1.3	0.52477	0.28196	0.45871	0.7572	0.70656	0.15987	0.039726	0.25763	-0.24955
1427391_a_at	Col12a1	collagen, type XII, alpha 1	0007155 // cell adhesion // inferred from electronic annotation	0005576 // extracellular region // inferred from electronic annotation /// 0005578 // proteinaceous extracellular matrix // inferred from electronic annotation /// 0005595 // collagen type XII // inferred from electronic annotation	0005198 // structural molecule activity // inferred from electronic annotation /// 0005515 // protein binding // inferred from electronic annotation	Electron_Transport_Chain // GenMAPP	gb:AW412729 /DB_XREF=gi:6938645 /DB_XREF=uq45h12.x1 /CLONE=IMAGE:2812391 /FEA=mRNA /CNT=20 /TID=Mm.3819.2 /TIER=ConsEnd /STK=2 /UG=Mm.3819 /LL=12816 /UG_GENE=Col12a1 /UG_TITLE=procollagen, type XII, alpha 1	-0.2704	0.26268	0.37381	-0.71233	-0.61511	-0.69175	-0.67748	-0.98864	-0.63144	-1.1935	-0.8259	-0.96155
1427503_at	AI324046	expressed sequence AI324046	---	0005576 // extracellular region // inferred from electronic annotation /// 0005886 // plasma membrane // inferred from electronic annotation /// 0016020 // membrane // inferred from electronic annotation /// 0016021 // integral to membrane // inferred from electronic annotation	0003823 // antigen binding // inferred from electronic annotation	---	gb:BE687919 /DB_XREF=gi:10075543 /DB_XREF=uw49b02.y1 /CLONE=IMAGE:3465291 /FEA=mRNA /CNT=9 /TID=Mm.14318.1 /TIER=ConsEnd /STK=0 /UG=Mm.14318 /UG_TITLE=Mus musculus germline imuunoglobulin gamma constant region (IgG3) mRNA	0.42979	0.3025	0.21386	0.24571	0.146	0.17968	0.0064747	0.33241	0.17735	0.57255	0.66649	0.72034
1427660_x_at	Gm10883 /// Gm1420 /// Gm7202 /// Igk /// Igk-C /// Igk-V28 /// LOC100047628	predicted gene 10883 /// predicted gene 1420 /// predicted gene 7202 /// immunoglobulin kappa chain complex /// immunoglobulin kappa chain, constant region /// immunoglobulin kappa chain variable 28 (V28) /// similar to Chain L, Structural Basis Of Antige	---	---	0003823 // antigen binding // inferred from electronic annotation /// 0004872 // receptor activity // inferred from electronic annotation	---	gb:BC013496.1 /DB_XREF=gi:15488700 /FEA=mRNA /CNT=2 /TID=Mm.104747.19 /TIER=ConsEnd /STK=0 /UG=Mm.104747 /LL=16114 /UG_GENE=Igk-V28 /DEF=Mus musculus, clone IMAGE:4219618, mRNA, partial cds. /PROD=Unknown (protein for IMAGE:4219618)	0.34314	0.3996	0.13761	0.73938	0.62781	0.6802	0.6054	0.68786	1.0257	0.8673	0.73615	0.8745
1427851_x_at	AB069917 /// Ighv1-72 /// LOC100045341 /// LOC382693 /// LOC546230 /// LOC631518 /// LOC677643 /// V165-D-J-C mu	cDNA sequence AB069917 /// immunoglobulin heavy variable V1-72 /// similar to RGD1359202 protein /// similar to immunoglobulin heavy chain /// similar to Ig heavy chain V region 102 precursor /// similar to Ig heavy chain V-II region SESS precursor /// si	---	---	0003823 // antigen binding // inferred from electronic annotation	---	gb:AF065324.1 /DB_XREF=gi:4234744 /GEN=Vh186.2Jh2 /FEA=mRNA /CNT=1 /TID=Mm.157783.11 /TIER=ConsEnd /STK=0 /UG=Mm.157783 /LL=104911 /DEF=Mus musculus clone X1AC1701 immunoglobulin heavy chain variable region (Vh186.2Jh2) mRNA, partial cds. /PROD=immunoglobulin heavy chain variable region	0.20536	-0.027336	0.10745	0.32575	0.03519	0.63395	0.64461	0.7876	1.1262	0.63519	0.8793	0.73167
1427919_at	Srpx2	sushi-repeat-containing protein, X-linked 2	---	0005576 // extracellular region // inferred from electronic annotation	---	---	gb:BC028307.1 /DB_XREF=gi:20271427 /FEA=mRNA /CNT=39 /TID=Mm.45735.1 /TIER=Stack /STK=22 /UG=Mm.45735 /LL=68792 /UG_GENE=1110039C07Rik /DEF=Mus musculus, Similar to sushi-repeat protein, clone MGC:27843 IMAGE:3488526, mRNA, complete cds. /PROD=Similar to sushi-repeat protein	-0.11298	0.41776	0.47304	-0.28311	-0.56464	-0.22585	-0.65352	-0.55462	-0.79587	-1.1722	-0.79315	-0.80732
1427986_a_at	Col16a1	collagen, type XVI, alpha 1	0007155 // cell adhesion // inferred from electronic annotation /// 0007155 // cell adhesion // inferred from sequence or structural similarity	0005576 // extracellular region // inferred from electronic annotation /// 0005578 // proteinaceous extracellular matrix // inferred from electronic annotation	0005178 // integrin binding // inferred from electronic annotation /// 0005178 // integrin binding // inferred from sequence or structural similarity /// 0005198 // structural molecule activity // inferred from electronic annotation /// 0005515 // protein binding // inferred from electronic annotation /// 0005515 // protein binding // inferred from sequence or structural similarity	---	gb:BB766878 /DB_XREF=gi:16194279 /DB_XREF=BB766878 /CLONE=G370068E15 /FEA=mRNA /CNT=124 /TID=Mm.41860.1 /TIER=Stack /STK=15 /UG=Mm.41860 /LL=107581 /UG_GENE=Col16a1 /UG_TITLE=procollagen, type XVI, alpha 1	0.091105	0.90833	0.76725	-0.1101	-0.23511	-0.076226	-0.47358	-0.38988	-0.34578	-0.60759	-0.55466	-0.47778
1428167_a_at	Mpzl1	myelin protein zero-like 1	---	0016020 // membrane // inferred from electronic annotation /// 0016021 // integral to membrane // inferred from electronic annotation	0005515 // protein binding // inferred from electronic annotation	---	gb:AK003513.1 /DB_XREF=gi:12834223 /FEA=mRNA /CNT=191 /TID=Mm.46438.1 /TIER=Stack /STK=84 /UG=Mm.46438 /LL=68481 /UG_GENE=1110007A10Rik /UG_TITLE=RIKEN cDNA 1110007A10 gene /DEF=Mus musculus 18 days embryo whole body cDNA, RIKEN full-length enriched library, clone:1110007A10:hypothetical protein, full insert sequence.	-0.14056	0.18521	0.32641	-0.44569	-0.47424	-0.24315	-0.62091	-0.14472	-0.030436	-0.72639	-0.50477	-0.60487
1428259_at	Pxdn	peroxidasin homolog (Drosophila)	0006979 // response to oxidative stress // inferred from electronic annotation /// 0042744 // hydrogen peroxide catabolic process // inferred from electronic annotation /// 0055114 // oxidation reduction // inferred from electronic annotation	0005576 // extracellular region // inferred from electronic annotation	0004601 // peroxidase activity // inferred from electronic annotation /// 0005506 // iron ion binding // inferred from electronic annotation /// 0005509 // calcium ion binding // inferred from electronic annotation /// 0005515 // protein binding // inferred from electronic annotation /// 0016491 // oxidoreductase activity // inferred from electronic annotation /// 0020037 // heme binding // infer…	---	gb:AK010185.1 /DB_XREF=gi:12845446 /FEA=mRNA /CNT=137 /TID=Mm.27386.1 /TIER=Stack /STK=65 /UG=Mm.27386 /LL=69675 /UG_GENE=2310075M15Rik /UG_TITLE=RIKEN cDNA 2310075M15 gene /DEF=Mus musculus adult male tongue cDNA, RIKEN full-length enriched library, clone:2310075M15:unclassifiable transcript, full insert sequence.	0.46922	1.3051	1.0284	-0.12543	-0.54944	-0.08631	-0.48235	-0.35505	-0.34073	-0.78948	-0.56072	-0.75604
1428301_at	100041874 /// 544988 /// ENSMUSG00000063277 /// ENSMUSG00000068790 /// ENSMUSG00000072735 /// Gm3194 /// Gm8108 /// Gm8206 /// LOC100036568 /// LOC671957	predicted gene, 100041874 /// predicted gene, 544988 /// predicted gene, ENSMUSG00000063277 /// predicted gene, ENSMUSG00000068790 /// predicted gene, ENSMUSG00000072735 /// predicted gene 3194 /// predicted gene 8108 /// predicted gene 8206 /// hypotheti	---	---	---	---	gb:BM195235 /DB_XREF=gi:17746601 /DB_XREF=C0306B10-3 /CLONE=C0306B10 /FEA=mRNA /CNT=95 /TID=Mm.204.1 /TIER=Stack /STK=57 /UG=Mm.204 /LL=67055 /UG_GENE=2610042L04Rik /UG_TITLE=RIKEN cDNA 2610042L04 gene	0.096699	0.73994	0.39348	1.1595	1.3958	0.61263	-0.16828	0.14209	-0.20284	-0.068943	-0.14562	-0.30799
1428547_at	Nt5e	5' nucleotidase, ecto	0006164 // purine nucleotide biosynthetic process // inferred from electronic annotation /// 0006196 // AMP catabolic process // inferred from mutant phenotype /// 0009166 // nucleotide catabolic process // inferred from electronic annotation /// 0046086 // adenosine biosynthetic process // inferred from mutant phenotype /// 0050728 // negative regulation of inflammatory response // inferred from…	0005624 // membrane fraction // inferred from direct assay /// 0005737 // cytoplasm // inferred from electronic annotation /// 0005886 // plasma membrane // inferred from electronic annotation /// 0016020 // membrane // inferred from electronic annotation /// 0031225 // anchored to membrane // inferred from electronic annotation	0000166 // nucleotide binding // inferred from electronic annotation /// 0008198 // ferrous iron binding // inferred from electronic annotation /// 0008253 // 5'-nucleotidase activity // inferred from mutant phenotype /// 0008253 // 5'-nucleotidase activity // inferred from electronic annotation /// 0008270 // zinc ion binding // inferred from electronic annotation /// 0016787 // hydrolase activi…	---	gb:AV273591 /DB_XREF=gi:15405538 /DB_XREF=AV273591 /CLONE=4932412C08 /FEA=mRNA /CNT=48 /TID=Mm.31676.1 /TIER=Stack /STK=33 /UG=Mm.31676 /LL=74242 /UG_GENE=2210401F01Rik /UG_TITLE=RIKEN cDNA 2210401F01 gene	-0.11294	0.39225	0.69876	-0.28949	-0.39081	-0.1065	-0.46029	0.017493	0.061908	-0.81194	-0.51396	-0.42417
1428568_at	B230217C12Rik	RIKEN cDNA B230217C12 gene	---	---	---	---	gb:BB399106 /DB_XREF=gi:16412661 /DB_XREF=BB399106 /CLONE=C330012J05 /FEA=mRNA /CNT=73 /TID=Mm.110270.1 /TIER=Stack /STK=32 /UG=Mm.110270 /LL=68127 /UG_GENE=B230217C12Rik /UG_TITLE=RIKEN cDNA B230217C12 gene	-0.2292	-0.12106	0.38186	-0.32727	-0.39912	-0.21324	-0.50718	-0.13233	-0.20337	-0.67751	-0.63101	-0.53615
1428774_at	Gpc6	glypican 6	---	0005576 // extracellular region // inferred from electronic annotation /// 0005578 // proteinaceous extracellular matrix // inferred from electronic annotation /// 0005615 // extracellular space // inferred from electronic annotation /// 0005886 // plasma membrane // inferred from electronic annotation /// 0005887 // integral to plasma membrane // inferred from sequence or structural similarity /…	0043395 // heparan sulfate proteoglycan binding // inferred from electronic annotation	---	gb:AK020118.1 /DB_XREF=gi:12860604 /FEA=mRNA /CNT=32 /TID=Mm.32940.1 /TIER=Stack /STK=22 /UG=Mm.32940 /LL=77735 /UG_GENE=6720429C22Rik /UG_TITLE=RIKEN cDNA 6720429C22 gene /DEF=Mus musculus 12 days embryo male wolffian duct includes surrounding region cDNA, RIKEN full-length enriched library, clone:6720429C22:unclassifiable transcript, full insert sequence.	-0.1338	0.032413	0.27347	-0.22604	-0.32663	-0.33932	-0.47668	-0.29067	-0.48849	-0.73483	-0.65943	-0.62779
1428902_at	Chst11	carbohydrate sulfotransferase 11	0002063 // chondrocyte development // inferred from mutant phenotype /// 0005975 // carbohydrate metabolic process // inferred from electronic annotation /// 0007585 // respiratory gaseous exchange // inferred from mutant phenotype /// 0009791 // post-embryonic development // inferred from mutant phenotype /// 0016051 // carbohydrate biosynthetic process // inferred from electronic annotation ///…	0005794 // Golgi apparatus // inferred from electronic annotation /// 0016020 // membrane // inferred from electronic annotation /// 0016021 // integral to membrane // inferred from electronic annotation	0001537 // N-acetylgalactosamine 4-O-sulfotransferase activity // inferred from electronic annotation /// 0008146 // sulfotransferase activity // inferred from direct assay /// 0008146 // sulfotransferase activity // inferred from electronic annotation /// 0016740 // transferase activity // inferred from electronic annotation /// 0047756 // chondroitin 4-sulfotransferase activity // inferred from…	---	gb:AK003880.1 /DB_XREF=gi:12834816 /FEA=mRNA /CNT=28 /TID=Mm.41333.1 /TIER=Stack /STK=18 /UG=Mm.41333 /LL=68647 /UG_GENE=1110020P09Rik /UG_TITLE=RIKEN cDNA 1110020P09 gene /DEF=Mus musculus 18 days embryo whole body cDNA, RIKEN full-length enriched library, clone:1110020P09:Metallothionein containing protein (reverse), full insert sequence.	-0.30264	-0.16113	0.26213	-0.41921	-0.60773	-0.4814	-0.55074	-0.14562	-0.18639	-0.63354	-0.64434	-0.51871
1428914_at	2310014D11Rik	RIKEN cDNA 2310014D11 gene	---	---	---	---	gb:AK009333.1 /DB_XREF=gi:12844068 /FEA=mRNA /CNT=38 /TID=Mm.29777.1 /TIER=Stack /STK=17 /UG=Mm.29777 /LL=69633 /UG_GENE=2310014D11Rik /UG_TITLE=RIKEN cDNA 2310014D11 gene /DEF=Mus musculus adult male tongue cDNA, RIKEN full-length enriched library, clone:2310014D11:hypothetical protein, full insert sequence.	0.0054153	0.19101	0.71682	-0.25275	-0.63267	-0.31893	-0.56088	-0.34318	-0.29999	-0.83579	-0.50721	-0.81232
1428948_at	5730414M22Rik	RIKEN cDNA 5730414M22 gene	---	---	---	---	gb:BE952741 /DB_XREF=gi:10593522 /DB_XREF=UI-M-BH4-azj-e-09-0-UI.s1 /CLONE=UI-M-BH4-azj-e-09-0-UI /FEA=mRNA /CNT=29 /TID=Mm.100108.1 /TIER=Stack /STK=16 /UG=Mm.100108 /LL=70528 /UG_GENE=5730414M22Rik /UG_TITLE=RIKEN cDNA 5730414M22 gene	0.013043	0.34225	0.75269	-0.010812	-0.15747	-0.15106	-0.33033	0.15113	-0.14058	-0.70676	-0.50453	-0.69695
1428994_s_at	Ucma	upper zone of growth plate and cartilage matrix associated	0045668 // negative regulation of osteoblast differentiation // inferred from direct assay	0005576 // extracellular region // inferred from electronic annotation /// 0005578 // proteinaceous extracellular matrix // inferred from direct assay /// 0005578 // proteinaceous extracellular matrix // inferred from electronic annotation	---	---	gb:AK003750.1 /DB_XREF=gi:12834609 /FEA=mRNA /CNT=18 /TID=Mm.27791.1 /TIER=Stack /STK=15 /UG=Mm.27791 /LL=68527 /UG_GENE=1110017I16Rik /UG_TITLE=RIKEN cDNA 1110017I16 gene /DEF=Mus musculus 18 days embryo whole body cDNA, RIKEN full-length enriched library, clone:1110017I16:hypothetical protein, full insert sequence.	-0.66026	-0.7244	-0.23395	-0.97825	-1.2784	-1.1329	-1.4973	-0.82673	-0.58386	-2.0863	-1.9627	-1.7354
1429065_at	1200009F10Rik	RIKEN cDNA 1200009F10 gene	0006917 // induction of apoptosis // inferred from sequence or structural similarity /// 0010165 // response to X-ray // inferred from sequence or structural similarity	0005783 // endoplasmic reticulum // inferred from sequence or structural similarity /// 0005783 // endoplasmic reticulum // inferred from electronic annotation /// 0016020 // membrane // inferred from electronic annotation /// 0016021 // integral to membrane // inferred from electronic annotation	0005515 // protein binding // inferred from sequence or structural similarity	---	gb:AK006283.1 /DB_XREF=gi:12839298 /FEA=mRNA /CNT=22 /TID=Mm.45965.1 /TIER=Stack /STK=13 /UG=Mm.45965 /LL=69435 /UG_GENE=1700023M03Rik /UG_TITLE=RIKEN cDNA 1700023M03 gene /DEF=Mus musculus adult male testis cDNA, RIKEN full-length enriched library, clone:1700023M03:hypothetical protein, full insert sequence.	-0.13586	0.4395	0.91994	-0.18414	-0.37967	-0.16816	-0.55908	-0.25552	-0.10273	-0.8521	-0.50566	-0.66782
1429178_at	Odz3	odd Oz/ten-m homolog 3 (Drosophila)	0007165 // signal transduction // inferred from electronic annotation	0005887 // integral to plasma membrane // inferred from sequence or structural similarity /// 0016020 // membrane // inferred from electronic annotation /// 0016021 // integral to membrane // inferred from electronic annotation	---	---	gb:BB472509 /DB_XREF=gi:16428053 /DB_XREF=BB472509 /CLONE=D230045I11 /FEA=mRNA /CNT=14 /TID=Mm.45150.1 /TIER=Stack /STK=10 /UG=Mm.45150 /LL=70327 /UG_GENE=2610100B16Rik /UG_TITLE=RIKEN cDNA 2610100B16 gene	0.064835	0.47637	0.72096	-0.17994	-0.28092	-0.056269	-0.31195	-0.070044	-0.36424	-0.71431	-0.52428	-0.55898
1429280_at	Col22a1	collagen, type XXII, alpha 1	---	---	---	---	gb:AK010095.1 /DB_XREF=gi:12845301 /FEA=mRNA /CNT=15 /TID=Mm.24301.1 /TIER=Stack /STK=8 /UG=Mm.24301 /LL=69700 /UG_GENE=2310067L16Rik /UG_TITLE=RIKEN cDNA 2310067L16 gene /DEF=Mus musculus adult male tongue cDNA, RIKEN full-length enriched library, clone:2310067L16:related to COLLAGEN ALPHA 1(IX) CHAIN PRECURSOR (FRAGMENT), full insert sequence.	-0.018061	0.4004	0.67047	-0.13408	-0.50767	-0.28613	-0.46674	-0.37669	-0.34343	-0.92904	-0.44107	-0.72274
1429348_at	Sema3c	sema domain, immunoglobulin domain (Ig), short basic domain, secreted, (semaphorin) 3C	0001755 // neural crest cell migration // inferred from mutant phenotype /// 0001974 // blood vessel remodeling // inferred from mutant phenotype /// 0007275 // multicellular organismal development // inferred from electronic annotation /// 0007399 // nervous system development // inferred from electronic annotation /// 0007507 // heart development // inferred from mutant phenotype /// 0009791 //…	0005576 // extracellular region // inferred from electronic annotation /// 0005615 // extracellular space // inferred from direct assay /// 0016020 // membrane // inferred from electronic annotation	0004872 // receptor activity // inferred from electronic annotation /// 0030215 // semaphorin receptor binding // inferred from physical interaction	---	gb:AK004119.1 /DB_XREF=gi:12835179 /FEA=mRNA /CNT=82 /TID=Mm.69051.1 /TIER=Stack /STK=33 /UG=Mm.69051 /LL=68696 /UG_GENE=1110036B02Rik /UG_TITLE=RIKEN cDNA 1110036B02 gene /DEF=Mus musculus 18 days embryo whole body cDNA, RIKEN full-length enriched library, clone:1110036B02:unclassifiable transcript, full insert sequence.	0.18603	0.61096	0.78845	-0.0086647	-0.383	-0.01302	-0.20361	0.10886	-0.26059	-0.57963	-0.42655	-0.45699
1429417_at	Chsy3	chondroitin sulfate synthase 3	---	0005794 // Golgi apparatus // inferred from electronic annotation /// 0016020 // membrane // inferred from electronic annotation /// 0016021 // integral to membrane // inferred from electronic annotation /// 0032580 // Golgi cisterna membrane // inferred from electronic annotation	0016740 // transferase activity // inferred from electronic annotation /// 0016758 // transferase activity, transferring hexosyl groups // inferred from electronic annotation /// 0046872 // metal ion binding // inferred from electronic annotation /// 0047238 // glucuronosyl-N-acetylgalactosaminyl-proteoglycan 4-beta-N-acetylgalactosaminyltransferase activity // inferred from electronic annotation…	---	gb:AK019528.1 /DB_XREF=gi:12859793 /FEA=mRNA /CNT=32 /TID=Mm.84007.1 /TIER=Stack /STK=23 /UG=Mm.84007 /LL=78923 /UG_GENE=4833446K15Rik /UG_TITLE=RIKEN cDNA 4833446K15 gene /DEF=Mus musculus 0 day neonate head cDNA, RIKEN full-length enriched library, clone:4833446K15:homolog to KIAA0990 PROTEIN, full insert sequence.	-0.13738	0.19144	0.24372	-0.61675	-0.58556	-0.45499	-0.66039	-0.15349	0.082392	-0.97288	-0.46587	-0.8802
1429549_at	Col27a1	collagen, type XXVII, alpha 1	0007155 // cell adhesion // inferred from electronic annotation	0005576 // extracellular region // inferred from electronic annotation /// 0005578 // proteinaceous extracellular matrix // inferred from electronic annotation /// 0005581 // collagen // inferred from electronic annotation /// 0005583 // fibrillar collagen // inferred from direct assay	0005198 // structural molecule activity // inferred from electronic annotation /// 0005201 // extracellular matrix structural constituent // inferred from electronic annotation	---	gb:AI604146 /DB_XREF=gi:4613308 /DB_XREF=mt02f07.y1 /CLONE=IMAGE:619909 /FEA=mRNA /CNT=44 /TID=Mm.31400.1 /TIER=Stack /STK=15 /UG=Mm.31400 /LL=66652 /UG_GENE=5730512J02Rik /UG_TITLE=RIKEN cDNA 5730512J02 gene	-0.31495	-0.21639	0.30287	-0.70172	-0.91696	-0.59311	-0.83316	-0.70944	-0.4945	-1.2874	-1.293	-1.0469
1429556_at	2610024B07Rik	RIKEN cDNA 2610024B07 gene	---	---	---	---	gb:BM214769 /DB_XREF=gi:17773041 /DB_XREF=C0855F03-3 /CLONE=C0855F03 /FEA=mRNA /CNT=92 /TID=Mm.24685.1 /TIER=Stack /STK=14 /UG=Mm.24685 /LL=70301 /UG_GENE=2610024B07Rik /UG_TITLE=RIKEN cDNA 2610024B07 gene	0.51354	0.70054	0.70873	0.04434	0.005456	0.10016	0.21689	0.25691	-0.026919	-0.078232	-0.043945	-0.56769
1429637_at	1110032E23Rik	RIKEN cDNA 1110032E23 gene	---	0005794 // Golgi apparatus // inferred from electronic annotation /// 0016020 // membrane // inferred from electronic annotation /// 0016021 // integral to membrane // inferred from electronic annotation	---	---	gb:AK008987.1 /DB_XREF=gi:12843507 /FEA=mRNA /CNT=17 /TID=Mm.83701.1 /TIER=Stack /STK=12 /UG=Mm.83701 /LL=73663 /UG_GENE=2210419I08Rik /UG_TITLE=RIKEN cDNA 2210419I08 gene /DEF=Mus musculus adult male stomach cDNA, RIKEN full-length enriched library, clone:2210419I08:unclassifiable transcript, full insert sequence.	-0.18256	0.15264	0.6918	-0.42302	-0.47061	-0.60371	-0.62426	-0.16576	-0.28504	-0.81057	-0.73908	-0.77451
1429775_a_at	Gpr137b /// Gpr137b-ps /// LOC100044979	G protein-coupled receptor 137B /// G protein-coupled receptor 137B, pseudogene /// similar to Gpr137b protein	---	0016020 // membrane // inferred from electronic annotation /// 0016021 // integral to membrane // inferred from electronic annotation	---	---	gb:AK009736.1 /DB_XREF=gi:12844712 /FEA=mRNA /CNT=16 /TID=Mm.1585.2 /TIER=Stack /STK=8 /UG=Mm.1585 /LL=83924 /UG_GENE=Tm7sf1 /UG_TITLE=transmembrane 7 superfamily member 1 /DEF=Mus musculus adult male tongue cDNA, RIKEN full-length enriched library, clone:2310041G17:similar to PUTATIVE SEVEN PASS TRANSMEMBRANE PROTEIN, full insert sequence.	-0.37527	0.082897	0.011277	-0.72272	-0.44127	-0.3326	-0.69816	-0.44866	-0.79517	-0.81749	-0.5176	-0.445
1429809_at	Tmtc2	transmembrane and tetratricopeptide repeat containing 2	---	0005783 // endoplasmic reticulum // inferred from electronic annotation /// 0016020 // membrane // inferred from electronic annotation /// 0016021 // integral to membrane // inferred from electronic annotation	0005488 // binding // inferred from electronic annotation	---	gb:AK018506.1 /DB_XREF=gi:12858238 /FEA=mRNA /CNT=22 /TID=Mm.37266.1 /TIER=Stack /STK=8 /UG=Mm.37266 /LL=66807 /UG_GENE=8430438D04Rik /UG_TITLE=RIKEN cDNA 8430438D04 gene /DEF=Mus musculus adult male colon cDNA, RIKEN full-length enriched library, clone:9030414D20:unclassifiable, full insert sequence.	-0.063917	0.044018	0.41876	-0.1261	-0.29561	-0.35719	-0.67299	-0.32237	-0.30121	-0.86318	-0.52334	-0.96111
1429987_at	9930013L23Rik	RIKEN cDNA 9930013L23 gene	---	---	---	---	gb:AK018112.1 /DB_XREF=gi:12857678 /FEA=mRNA /CNT=8 /TID=Mm.12289.1 /TIER=ConsEnd /STK=5 /UG=Mm.12289 /LL=70718 /UG_GENE=6330404C01Rik /UG_TITLE=RIKEN cDNA 6330404C01 gene /DEF=Mus musculus adult male medulla oblongata cDNA, RIKEN full-length enriched library, clone:6330404C01:unclassifiable, full insert sequence.	-0.21151	-0.18896	0.41971	-0.47773	-0.79373	-0.42593	-0.72794	-0.29608	-0.41253	-1.3622	-1.0765	-0.86117
1430030_at	5330426P16Rik	RIKEN cDNA 5330426P16 gene	---	---	---	---	gb:AK019912.1 /DB_XREF=gi:12860308 /FEA=mRNA /CNT=19 /TID=Mm.139089.1 /TIER=ConsEnd /STK=4 /UG=Mm.139089 /LL=68190 /UG_GENE=5330426P16Rik /UG_TITLE=RIKEN cDNA 5330426P16 gene /DEF=Mus musculus adult male pituitary gland cDNA, RIKEN full-length enriched library, clone:5330426P16:unclassifiable transcript, full insert sequence.	-0.17392	0.090135	0.53597	-0.5221	-0.67124	-0.24272	-0.2606	0.19603	0.069869	-0.30711	-0.046914	-0.23171
1430353_at	Glis3	GLIS family zinc finger 3	0000122 // negative regulation of transcription from RNA polymerase II promoter // inferred from direct assay /// 0006350 // transcription // inferred from electronic annotation /// 0045449 // regulation of transcription // inferred from electronic annotation /// 0045944 // positive regulation of transcription from RNA polymerase II promoter // inferred from direct assay	0005622 // intracellular // inferred from electronic annotation /// 0005634 // nucleus // inferred from electronic annotation /// 0005634 // nucleus // inferred from direct assay /// 0044428 // nuclear part // inferred from direct assay	0003676 // nucleic acid binding // inferred from electronic annotation /// 0003677 // DNA binding // inferred from direct assay /// 0003677 // DNA binding // inferred from electronic annotation /// 0003700 // transcription factor activity // inferred from direct assay /// 0003704 // specific RNA polymerase II transcription factor activity // inferred from direct assay /// 0008270 // zinc ion bind…	---	gb:BB207363 /DB_XREF=gi:16352241 /DB_XREF=BB207363 /CLONE=A430081G06 /FEA=mRNA /CNT=11 /TID=Mm.170521.1 /TIER=ConsEnd /STK=2 /UG=Mm.170521 /LL=71622 /UG_GENE=4833409N03Rik /UG_TITLE=RIKEN cDNA 4833409N03 gene	0.21463	0.51043	0.75812	0.18518	0.089399	0.14373	-0.12823	0.13607	-0.10298	-0.51254	-0.25582	-0.11271
1430425_at	Sdk2	sidekick homolog 2 (chicken)	0007155 // cell adhesion // inferred from electronic annotation	0016020 // membrane // inferred from electronic annotation /// 0016021 // integral to membrane // inferred from electronic annotation	0005515 // protein binding // inferred from electronic annotation	---	gb:AW493494 /DB_XREF=gi:7063775 /DB_XREF=UI-M-BH3-auc-h-10-0-UI.s1 /CLONE=UI-M-BH3-auc-h-10-0-UI /FEA=mRNA /CNT=6 /TID=Mm.102220.1 /TIER=ConsEnd /STK=2 /UG=Mm.102220 /LL=75715 /UG_GENE=4632412F08Rik /UG_TITLE=RIKEN cDNA 4632412F08 gene	-0.17224	0.056134	0.53964	-0.20689	-0.39841	-0.43031	-0.43452	-0.20967	-0.37211	-0.75899	-0.55208	-0.46396
1430596_s_at	Vgll3	vestigial like 3 (Drosophila)	0006350 // transcription // inferred from electronic annotation /// 0045449 // regulation of transcription // inferred from electronic annotation	0005634 // nucleus // inferred from electronic annotation	0030528 // transcription regulator activity // inferred from electronic annotation	---	gb:BG066866 /DB_XREF=gi:12549435 /DB_XREF=H3047H06-3 /CLONE=H3047H06 /FEA=mRNA /CNT=14 /TID=Mm.32828.1 /TIER=ConsEnd /STK=1 /UG=Mm.32828 /LL=73569 /UG_GENE=1700110N18Rik /UG_TITLE=RIKEN cDNA 1700110N18 gene	0.51564	1.5857	0.92552	0.14083	0.30717	0.62143	0.1358	0.30055	0.10436	-0.21542	0.2277	0.16068
1431110_at	Plxdc2	plexin domain containing 2	---	0005886 // plasma membrane // not recorded /// 0016020 // membrane // inferred from electronic annotation /// 0016021 // integral to membrane // inferred from electronic annotation	---	---	gb:AK017369.1 /DB_XREF=gi:12856571 /FEA=mRNA /CNT=16 /TID=Mm.66317.1 /TIER=ConsEnd /STK=0 /UG=Mm.66317 /LL=74506 /UG_GENE=5430431D22Rik /UG_TITLE=RIKEN cDNA 5430431D22 gene /DEF=Mus musculus 6 days neonate head cDNA, RIKEN full-length enriched library, clone:5430431D22:unclassifiable, full insert sequence.	0.10052	0.53054	0.75152	0.13142	-0.10545	0.1658	-0.22228	0.1846	-0.25966	-0.56545	-0.31347	-0.32386
1431146_a_at	Cpne8	copine VIII	---	---	---	---	gb:AK004559.1 /DB_XREF=gi:12835810 /FEA=mRNA /CNT=10 /TID=Mm.80748.2 /TIER=ConsEnd /STK=0 /UG=Mm.80748 /LL=66871 /UG_GENE=1200003E11Rik /UG_TITLE=RIKEN cDNA 1200003E11 gene /DEF=Mus musculus adult male lung cDNA, RIKEN full-length enriched library, clone:1200003E11:homolog to COPINE-LIKE PROTEIN KIAA1599, full insert sequence.	0.13544	0.31257	0.61578	-0.050009	-0.21463	-0.057645	-0.36618	0.012503	-0.079008	-0.67291	-0.54705	-0.41225
1431375_s_at	Parva	parvin, alpha	0007155 // cell adhesion // inferred from direct assay /// 0007155 // cell adhesion // inferred from electronic annotation /// 0030036 // actin cytoskeleton organization // inferred from electronic annotation /// 0051291 // protein heterooligomerization // inferred from electronic annotation	0005634 // nucleus // inferred from direct assay /// 0005737 // cytoplasm // inferred from direct assay /// 0005737 // cytoplasm // inferred from electronic annotation /// 0005856 // cytoskeleton // inferred from electronic annotation /// 0005886 // plasma membrane // inferred from electronic annotation /// 0005925 // focal adhesion // inferred from direct assay /// 0005925 // focal adhesion // i…	0003779 // actin binding // inferred from direct assay /// 0003779 // actin binding // inferred from electronic annotation /// 0005515 // protein binding // inferred from physical interaction /// 0005515 // protein binding // inferred from electronic annotation	---	gb:BI690209 /DB_XREF=gi:15652838 /DB_XREF=603310412F1 /CLONE=IMAGE:5346458 /FEA=mRNA /CNT=4 /TID=Mm.195762.1 /TIER=ConsEnd /STK=0 /UG=Mm.195762 /LL=76528 /UG_GENE=2010012A22Rik /UG_TITLE=RIKEN cDNA 2010012A22 gene	0.062309	0.50355	0.63505	-0.23505	-0.40282	-0.032483	-0.40693	-0.092257	-0.26782	-0.789	-0.4697	-0.54965
1431475_a_at	Hoxa10	homeo box A10	0001501 // skeletal system development // inferred from genetic interaction /// 0006350 // transcription // inferred from electronic annotation /// 0006355 // regulation of transcription, DNA-dependent // inferred from electronic annotation /// 0007275 // multicellular organismal development // inferred from direct assay /// 0007275 // multicellular organismal development // inferred from electro…	0005634 // nucleus // inferred from electronic annotation /// 0005667 // transcription factor complex // inferred from direct assay	0003677 // DNA binding // traceable author statement /// 0003677 // DNA binding // inferred from electronic annotation /// 0003700 // transcription factor activity // inferred from electronic annotation /// 0005515 // protein binding // inferred from physical interaction /// 0030528 // transcription regulator activity // inferred from electronic annotation /// 0043565 // sequence-specific DNA bin…	---	gb:AK002670.1 /DB_XREF=gi:12832825 /FEA=mRNA /CNT=3 /TID=Mm.5.2 /TIER=ConsEnd /STK=2 /UG=Mm.5 /LL=15395 /UG_GENE=Hoxa10 /UG_TITLE=homeo box A10 /DEF=Mus musculus adult male kidney cDNA, RIKEN full-length enriched library, clone:0610025N02:homeo box A10, full insert sequence.	-0.11228	0.19926	0.39595	-0.41301	-0.65521	-0.25227	-0.75946	-0.29866	-0.31828	-0.98886	-0.62969	-0.95069
1431609_a_at	Acp5	acid phosphatase 5, tartrate resistant	0006955 // immune response // inferred from mutant phenotype /// 0016311 // dephosphorylation // inferred from direct assay /// 0034097 // response to cytokine stimulus // inferred from direct assay /// 0045453 // bone resorption // inferred from mutant phenotype /// 0060349 // bone morphogenesis // inferred from mutant phenotype	0005764 // lysosome // inferred from mutant phenotype /// 0005764 // lysosome // inferred from electronic annotation	0003993 // acid phosphatase activity // inferred from direct assay /// 0003993 // acid phosphatase activity // inferred from mutant phenotype /// 0003993 // acid phosphatase activity // inferred from electronic annotation /// 0005506 // iron ion binding // inferred from electronic annotation /// 0016787 // hydrolase activity // inferred from electronic annotation /// 0046872 // metal ion binding …	---	gb:AK008391.1 /DB_XREF=gi:12842548 /FEA=mRNA /CNT=2 /TID=Mm.46354.4 /TIER=ConsEnd /STK=1 /UG=Mm.46354 /LL=11433 /UG_GENE=Acp5 /UG_TITLE=acid phosphatase 5, tartrate resistant /DEF=Mus musculus adult male small intestine cDNA, RIKEN full-length enriched library, clone:2010110O21:acid phosphatase 5, tartrate resistant, full insert sequence.	-0.18158	0.14712	0.57905	-0.36515	-0.32869	-0.49328	-0.70426	-0.60951	-0.60599	-0.91277	-0.76849	-0.76536
1432517_a_at	Nnmt	nicotinamide N-methyltransferase	---	0005737 // cytoplasm // inferred from electronic annotation	0008112 // nicotinamide N-methyltransferase activity // inferred from electronic annotation /// 0008168 // methyltransferase activity // inferred from electronic annotation /// 0016740 // transferase activity // inferred from electronic annotation	---	gb:AK006371.1 /DB_XREF=gi:12839437 /GEN=Nnmt /FEA=mRNA /CNT=1 /TID=Mm.8362.2 /TIER=ConsEnd /STK=0 /UG=Mm.8362 /LL=18113 /UG_TITLE=nicotinamide N-methyltransferase /DEF=Mus musculus adult male testis cDNA, RIKEN full-length enriched library, clone:1700026B06:nicotinamide N-methyltransferase, full insert sequence.	-0.36989	0.27724	0.31505	-0.51004	-0.55845	-0.45626	-0.66038	-0.54832	-0.38832	-0.8131	-0.68824	-0.97618
1433417_at	8030497O21Rik	RIKEN cDNA 8030497O21 gene	---	---	---	---	gb:AK020225.1 /DB_XREF=gi:12860740 /FEA=mRNA /CNT=1 /TID=Mm.159930.1 /TIER=ConsEnd /STK=0 /UG=Mm.159930 /LL=77506 /UG_GENE=8030497O21Rik /UG_TITLE=RIKEN cDNA 8030497O21 gene /DEF=Mus musculus 15 days embryo male testis cDNA, RIKEN full-length enriched library, clone:8030497O21:unclassifiable, full insert sequence.	0.27537	0.182	0.031396	0.5371	0.95655	0.63319	0.41673	0.20291	0.047634	0.10064	-0.17519	0.090923
1433575_at	Sox4	SRY-box containing gene 4	0002328 // pro-B cell differentiation // inferred from mutant phenotype /// 0006350 // transcription // inferred from electronic annotation /// 0007507 // heart development // inferred from mutant phenotype /// 0008284 // positive regulation of cell proliferation // inferred from electronic annotation /// 0030177 // positive regulation of Wnt receptor signaling pathway // inferred from mutant phe…	0005634 // nucleus // inferred from direct assay /// 0005634 // nucleus // inferred from electronic annotation /// 0005737 // cytoplasm // inferred from electronic annotation	0003677 // DNA binding // inferred from electronic annotation /// 0005515 // protein binding // inferred from electronic annotation /// 0016563 // transcription activator activity // not recorded	---	gb:BG083485 /DB_XREF=gi:12566141 /DB_XREF=H3089F12-5 /CLONE=H3089F12 /FEA=EST /CNT=168 /TID=Mm.18789.2 /TIER=Stack /STK=88 /UG=Mm.18789 /LL=20677 /UG_GENE=Sox4 /UG_TITLE=SRY-box containing gene 4	-0.14178	0.32694	0.37561	-0.090996	-0.29495	-0.15126	-0.46513	-0.39417	-0.63883	-0.60969	-0.60379	-0.6503
1433742_at	Kank1	KN motif and ankyrin repeat domains 1	0030837 // negative regulation of actin filament polymerization // not recorded	---	---	---	gb:BQ032773 /DB_XREF=gi:19768052 /DB_XREF=UI-1-CF0-axa-g-11-0-UI.s1 /CLONE=UI-1-CF0-axa-g-11-0-UI /FEA=EST /CNT=87 /TID=Mm.25891.1 /TIER=Stack /STK=65 /UG=Mm.25891 /LL=107280 /UG_GENE=AU015049 /UG_TITLE=expressed sequence AU015049	-0.13331	-0.34141	-0.0097003	-0.48663	-0.57534	-0.35151	-0.49881	-0.3936	-0.45292	-0.91006	-0.69537	-0.69568
1433768_at	Palld	palladin, cytoskeletal associated protein	---	0005634 // nucleus // inferred from sequence or structural similarity /// 0005737 // cytoplasm // inferred from electronic annotation /// 0005856 // cytoskeleton // inferred from electronic annotation /// 0005884 // actin filament // inferred from sequence or structural similarity	0003779 // actin binding // inferred from electronic annotation	---	gb:BG071905 /DB_XREF=gi:12554474 /DB_XREF=H3104E03-3 /CLONE=H3104E03 /FEA=EST /CNT=99 /TID=Mm.27390.1 /TIER=Stack /STK=62 /UG=Mm.27390 /UG_TITLE=ESTs	0.030879	0.50777	0.56372	-0.28718	-0.22651	-0.24239	-0.56076	-0.054246	-0.13175	-0.64798	-0.34967	-0.52442
1433779_at	Casc4	cancer susceptibility candidate 4	---	0016020 // membrane // inferred from electronic annotation /// 0016021 // integral to membrane // inferred from electronic annotation	---	---	gb:AV311104 /DB_XREF=gi:16394245 /DB_XREF=AV311104 /CLONE=5730594D13 /FEA=EST /CNT=82 /TID=Mm.31922.1 /TIER=Stack /STK=61 /UG=Mm.31922 /UG_TITLE=ESTs, Moderately similar to S12207 hypothetical protein (M.musculus)	-0.16113	0.28043	0.36497	-0.35269	-0.69458	-0.32582	-0.53118	-0.034253	-0.25165	-0.45113	-0.28134	-0.50525
1433833_at	Fndc3b	fibronectin type III domain containing 3B	0045600 // positive regulation of fat cell differentiation // inferred from physical interaction	0005783 // endoplasmic reticulum // inferred from electronic annotation /// 0016020 // membrane // inferred from electronic annotation /// 0016021 // integral to membrane // inferred from electronic annotation	---	---	gb:BG064539 /DB_XREF=gi:12547102 /DB_XREF=H3020H08-3 /CLONE=H3020H08 /FEA=EST /CNT=86 /TID=Mm.200324.1 /TIER=Stack /STK=57 /UG=Mm.200324 /LL=99920 /UG_GENE=AW550168 /UG_TITLE=expressed sequence AW550168	-0.036586	0.57532	0.80517	-0.13521	-0.23767	-0.11635	-0.61699	-0.21647	-0.19414	-0.60633	-0.48239	-0.5805
1433857_at	Fat1	FAT tumor suppressor homolog 1 (Drosophila)	0007015 // actin filament organization // inferred from mutant phenotype /// 0007155 // cell adhesion // inferred from electronic annotation /// 0007156 // homophilic cell adhesion // inferred from electronic annotation /// 0007163 // establishment or maintenance of cell polarity // inferred from mutant phenotype /// 0016337 // cell-cell adhesion // inferred from mutant phenotype	0005886 // plasma membrane // inferred from electronic annotation /// 0016020 // membrane // inferred from electronic annotation /// 0030027 // lamellipodium // inferred from direct assay /// 0030054 // cell junction // inferred from direct assay /// 0030175 // filopodium // inferred from direct assay	0005509 // calcium ion binding // inferred from electronic annotation /// 0005515 // protein binding // inferred from physical interaction	---	gb:AV088463 /DB_XREF=gi:16381427 /DB_XREF=AV088463 /CLONE=2310038E12 /FEA=EST /CNT=110 /TID=Mm.27365.1 /TIER=Stack /STK=56 /UG=Mm.27365 /LL=102241 /UG_GENE=AU023433 /UG_TITLE=expressed sequence AU023433	-0.059598	0.1684	0.42295	-0.11739	0.017186	-0.25437	-0.49392	-0.53029	-0.63889	-0.90513	-0.70255	-0.75072
1433891_at	Lgr4	leucine-rich repeat-containing G protein-coupled receptor 4	0007165 // signal transduction // inferred from electronic annotation /// 0007186 // G-protein coupled receptor protein signaling pathway // inferred from electronic annotation /// 0030539 // male genitalia development // inferred from mutant phenotype /// 0035239 // tube morphogenesis // inferred from mutant phenotype /// 0050673 // epithelial cell proliferation // inferred from mutant phenotype	0005886 // plasma membrane // inferred from electronic annotation /// 0016020 // membrane // inferred from electronic annotation /// 0016021 // integral to membrane // inferred from electronic annotation	0004871 // signal transducer activity // inferred from electronic annotation /// 0004872 // receptor activity // inferred from electronic annotation /// 0004930 // G-protein coupled receptor activity // inferred from electronic annotation /// 0005515 // protein binding // inferred from electronic annotation /// 0016500 // protein-hormone receptor activity // inferred from electronic annotation	---	gb:BI107632 /DB_XREF=gi:14558525 /DB_XREF=602894083F1 /CLONE=IMAGE:5038868 /FEA=EST /CNT=60 /TID=Mm.40636.1 /TIER=Stack /STK=54 /UG=Mm.40636 /UG_TITLE=ESTs, Weakly similar to JG0193 G protein-coupled receptor FEX - mouse (M.musculus)	-0.16947	0.057484	0.24672	-0.27767	-0.30286	-0.2956	-0.42174	-0.23047	-0.44325	-0.81665	-0.63114	-0.62423
1433924_at	---	---	---	---	---	---	gb:BM200248 /DB_XREF=gi:17753448 /DB_XREF=C0207H01-3 /CLONE=C0207H01 /FEA=EST /CNT=75 /TID=Mm.7952.2 /TIER=Stack /STK=51 /UG=Mm.7952 /LL=18616 /UG_GENE=Peg3 /UG_TITLE=paternally expressed 3	-0.52064	-0.18131	0.008889	-0.8774	-1.0192	-0.76631	-0.81181	-0.75125	-0.48593	-1.2288	-1.067	-1.1214
1434089_at	Synpo	synaptopodin	0030865 // cortical cytoskeleton organization // non-traceable author statement	0005737 // cytoplasm // inferred from electronic annotation /// 0005856 // cytoskeleton // inferred from electronic annotation /// 0005886 // plasma membrane // inferred from electronic annotation /// 0005923 // tight junction // inferred from electronic annotation /// 0014069 // postsynaptic density // inferred from electronic annotation /// 0015629 // actin cytoskeleton // inferred from direct …	0003779 // actin binding // inferred from direct assay /// 0003779 // actin binding // inferred from electronic annotation	---	gb:BB426294 /DB_XREF=gi:16423669 /DB_XREF=BB426294 /CLONE=C630001F01 /FEA=EST /CNT=72 /TID=Mm.27313.1 /TIER=Stack /STK=43 /UG=Mm.27313 /LL=107019 /UG_GENE=AW046661 /UG_TITLE=expressed sequence AW046661	0.14546	0.53236	0.5887	-0.12352	-0.43991	-0.089232	-0.25387	-0.16745	-0.38326	-0.50979	-0.4778	-0.3918
1434102_at	Nfib	nuclear factor I/B	0006260 // DNA replication // inferred from electronic annotation /// 0006350 // transcription // inferred from electronic annotation /// 0006355 // regulation of transcription, DNA-dependent // inferred from electronic annotation /// 0008285 // negative regulation of cell proliferation // inferred from mutant phenotype /// 0030324 // lung development // inferred from mutant phenotype /// 0030900…	0005622 // intracellular // inferred from electronic annotation /// 0005634 // nucleus // inferred from electronic annotation	0003677 // DNA binding // inferred from electronic annotation /// 0003690 // double-stranded DNA binding // inferred from electronic annotation /// 0003700 // transcription factor activity // inferred from electronic annotation /// 0016563 // transcription activator activity // inferred from direct assay	---	gb:BB100463 /DB_XREF=gi:8753031 /DB_XREF=BB100463 /CLONE=9430072P07 /FEA=EST /CNT=270 /TID=Mm.34578.1 /TIER=Stack /STK=23 /UG=Mm.34578 /UG_TITLE=ESTs	0.14806	0.54	0.79215	0.040534	-0.28368	0.017633	-0.21397	-0.10647	-0.29094	-0.76626	-0.4793	-0.78142
1434115_at	Cdh13	cadherin 13	0001558 // regulation of cell growth // inferred from electronic annotation /// 0001938 // positive regulation of endothelial cell proliferation // inferred from electronic annotation /// 0001954 // positive regulation of cell-matrix adhesion // inferred from electronic annotation /// 0002040 // sprouting angiogenesis // inferred from electronic annotation /// 0007155 // cell adhesion // inferred…	0005615 // extracellular space // inferred from electronic annotation /// 0005737 // cytoplasm // inferred from electronic annotation /// 0005886 // plasma membrane // inferred from direct assay /// 0005886 // plasma membrane // inferred from electronic annotation /// 0005901 // caveola // inferred from electronic annotation /// 0009897 // external side of plasma membrane // inferred from direct …	0005509 // calcium ion binding // inferred from electronic annotation /// 0005515 // protein binding // inferred from physical interaction /// 0005515 // protein binding // inferred from electronic annotation /// 0030169 // low-density lipoprotein binding // inferred from electronic annotation /// 0042803 // protein homodimerization activity // inferred from direct assay /// 0045296 // cadherin b…	---	gb:BQ176681 /DB_XREF=gi:20352173 /DB_XREF=UI-M-DJ2-bvz-k-12-0-UI.s1 /CLONE=UI-M-DJ2-bvz-k-12-0-UI /FEA=EST /CNT=68 /TID=Mm.27614.1 /TIER=Stack /STK=42 /UG=Mm.27614 /UG_TITLE=ESTs	0.30196	0.54051	0.62725	0.066963	-0.17926	-0.039177	-0.068651	0.078757	-0.22858	-0.54586	-0.35382	-0.38578
1434186_at	Lpar4	lysophosphatidic acid receptor 4	0007165 // signal transduction // inferred from electronic annotation /// 0007186 // G-protein coupled receptor protein signaling pathway // inferred from electronic annotation	0005886 // plasma membrane // inferred from electronic annotation /// 0016020 // membrane // inferred from electronic annotation /// 0016021 // integral to membrane // inferred from electronic annotation	0004871 // signal transducer activity // inferred from electronic annotation /// 0004872 // receptor activity // inferred from electronic annotation /// 0004930 // G-protein coupled receptor activity // inferred from electronic annotation /// 0008289 // lipid binding // inferred from electronic annotation /// 0045028 // purinergic nucleotide receptor activity, G-protein coupled // inferred from e…	---	gb:BB297502 /DB_XREF=gi:16401985 /DB_XREF=BB297502 /CLONE=B130055L15 /FEA=EST /CNT=57 /TID=Mm.33503.1 /TIER=Stack /STK=39 /UG=Mm.33503 /UG_TITLE=ESTs, Highly similar to P2Y9_HUMAN P2Y PURINOCEPTOR 9 (H.sapiens)	-0.40777	0.23789	0.70956	-0.57234	-0.77548	-0.28269	-0.77773	-0.60971	-0.44806	-1.3257	-0.95588	-1.096
1434264_at	Ank2	ankyrin 2, brain	0006915 // apoptosis // inferred from reviewed computational analysis /// 0007165 // signal transduction // inferred from electronic annotation /// 0008104 // protein localization // inferred from mutant phenotype /// 0034394 // protein localization at cell surface // inferred from mutant phenotype /// 0042981 // regulation of apoptosis // inferred from reviewed computational analysis /// 0060048…	0005737 // cytoplasm // inferred from direct assay /// 0005737 // cytoplasm // inferred from electronic annotation /// 0005856 // cytoskeleton // inferred from electronic annotation /// 0005886 // plasma membrane // inferred from electronic annotation /// 0005887 // integral to plasma membrane // inferred from direct assay /// 0016020 // membrane // inferred from electronic annotation /// 0016324…	0005515 // protein binding // inferred from physical interaction /// 0005515 // protein binding // inferred from electronic annotation	---	gb:BQ174638 /DB_XREF=gi:20350129 /DB_XREF=UI-M-DJ2-bwb-c-17-0-UI.s1 /CLONE=UI-M-DJ2-bwb-c-17-0-UI /FEA=EST /CNT=59 /TID=Mm.41182.1 /TIER=Stack /STK=37 /UG=Mm.41182 /LL=99718 /UG_GENE=AI835472 /UG_TITLE=expressed sequence AI835472	0.17679	0.43878	0.58817	-0.37688	-0.72346	-0.10527	-0.17364	0.39624	-0.46127	-0.53974	-0.46736	-0.53533
1434279_at	---	---	---	---	---	---	gb:BI076485 /DB_XREF=gi:14515142 /DB_XREF=G0109C05-3 /CLONE=G0109C05 /FEA=EST /CNT=386 /TID=Mm.30502.2 /TIER=Stack /STK=48 /UG=Mm.30502 /LL=13803 /UG_GENE=Enc1 /UG_TITLE=ectodermal-neural cortex 1	0.052941	0.404	0.020523	0.556	1.1252	0.51403	-0.17779	0.30387	0.25914	-0.057661	0.23582	0.16906
1434286_at	Trps1	trichorhinophalangeal syndrome I (human)	0006350 // transcription // inferred from electronic annotation /// 0006355 // regulation of transcription, DNA-dependent // inferred from electronic annotation /// 0045449 // regulation of transcription // inferred from electronic annotation /// 0045892 // negative regulation of transcription, DNA-dependent // inferred from physical interaction	0005622 // intracellular // inferred from electronic annotation /// 0005634 // nucleus // inferred by curator /// 0005634 // nucleus // inferred from electronic annotation	0003677 // DNA binding // inferred from electronic annotation /// 0003700 // transcription factor activity // inferred from electronic annotation /// 0005515 // protein binding // inferred from physical interaction /// 0008270 // zinc ion binding // inferred from electronic annotation /// 0016564 // transcription repressor activity // inferred from physical interaction /// 0043565 // sequence-spe…	---	gb:BQ176054 /DB_XREF=gi:20351546 /DB_XREF=UI-M-DJ2-bwf-o-12-0-UI.s1 /CLONE=UI-M-DJ2-bwf-o-12-0-UI /FEA=EST /CNT=72 /TID=Mm.22380.1 /TIER=Stack /STK=36 /UG=Mm.22380 /LL=105778 /UG_GENE=AI115454 /UG_TITLE=expressed sequence AI115454	-0.10514	0.29043	0.58528	-0.23753	-0.49133	-0.22758	-0.72832	-0.23922	-0.19094	-1.05	-0.71986	-0.80485
1434291_a_at	Serf1	small EDRK-rich factor 1	---	---	---	---	gb:AA709993 /DB_XREF=gi:2719911 /DB_XREF=vt36b04.r1 /CLONE=IMAGE:1165135 /FEA=EST /CNT=41 /TID=Mm.1749.3 /TIER=Stack /STK=36 /UG=Mm.1749 /LL=20365 /UG_GENE=Serf1 /UG_TITLE=small EDRK-rich factor 1	-0.07825	0.20615	0.4726	-0.15609	-0.58294	-0.20685	-0.3859	-0.22743	-0.074899	-0.52254	-0.34795	-0.58459
1434360_s_at	LOC632664 /// Ptprg	similar to protein tyrosine phosphatase, receptor type, G /// protein tyrosine phosphatase, receptor type, G	0006470 // protein amino acid dephosphorylation // inferred from electronic annotation /// 0016311 // dephosphorylation // inferred from electronic annotation	0016020 // membrane // inferred from electronic annotation /// 0016021 // integral to membrane // inferred from electronic annotation	0004721 // phosphoprotein phosphatase activity // inferred from electronic annotation /// 0004725 // protein tyrosine phosphatase activity // inferred from electronic annotation /// 0016787 // hydrolase activity // inferred from electronic annotation /// 0016791 // phosphatase activity // inferred from electronic annotation /// 0042802 // identical protein binding // inferred from electronic anno…	---	gb:AI596632 /DB_XREF=gi:4605680 /DB_XREF=ml66e01.y1 /CLONE=IMAGE:516984 /FEA=EST /CNT=37 /TID=Mm.202333.1 /TIER=Stack /STK=34 /UG=Mm.202333 /LL=105646 /UG_GENE=AW046354 /UG_TITLE=expressed sequence AW046354	0.021631	0.35408	0.51073	-0.28105	-0.36829	-0.1424	-0.40762	-0.28749	-0.40418	-0.892	-0.52348	-0.63179
1434479_at	Col5a1	collagen, type V, alpha 1	0001568 // blood vessel development // inferred from mutant phenotype /// 0003007 // heart morphogenesis // inferred from genetic interaction /// 0007155 // cell adhesion // inferred from electronic annotation /// 0030199 // collagen fibril organization // inferred from genetic interaction /// 0030199 // collagen fibril organization // inferred from mutant phenotype /// 0030199 // collagen fibril…	0005576 // extracellular region // inferred from electronic annotation /// 0005578 // proteinaceous extracellular matrix // inferred from electronic annotation /// 0005581 // collagen // inferred from direct assay /// 0005581 // collagen // inferred from mutant phenotype /// 0005581 // collagen // inferred from electronic annotation /// 0005588 // collagen type V // inferred from electronic annot…	0005198 // structural molecule activity // inferred from electronic annotation /// 0005201 // extracellular matrix structural constituent // inferred from direct assay /// 0005201 // extracellular matrix structural constituent // inferred from electronic annotation /// 0005515 // protein binding // inferred from physical interaction /// 0008201 // heparin binding // inferred from electronic annot…	---	gb:AV246911 /DB_XREF=gi:16387161 /DB_XREF=AV246911 /CLONE=4832419L24 /FEA=EST /CNT=61 /TID=Mm.7049.1 /TIER=Stack /STK=31 /UG=Mm.7049 /LL=98940 /UG_GENE=AI413331 /UG_TITLE=expressed sequence AI413331	0.33735	1.0479	0.9656	-0.10341	-0.49445	0.0054463	-0.58809	-0.52096	-0.52919	-0.84578	-0.61342	-0.73741
1434510_at	Papss2	3'-phosphoadenosine 5'-phosphosulfate synthase 2	0000103 // sulfate assimilation // inferred from direct assay /// 0000103 // sulfate assimilation // inferred from electronic annotation /// 0007596 // blood coagulation // inferred from mutant phenotype /// 0060348 // bone development // inferred from mutant phenotype	---	0000166 // nucleotide binding // inferred from electronic annotation /// 0003824 // catalytic activity // inferred from electronic annotation /// 0004020 // adenylylsulfate kinase activity // inferred from direct assay /// 0004020 // adenylylsulfate kinase activity // inferred from electronic annotation /// 0004781 // sulfate adenylyltransferase (ATP) activity // inferred from direct assay /// 00…	---	gb:BF780807 /DB_XREF=gi:12085840 /DB_XREF=602103086F1 /CLONE=IMAGE:4221452 /FEA=EST /CNT=63 /TID=Mm.203916.1 /TIER=Stack /STK=30 /UG=Mm.203916 /LL=107125 /UG_GENE=AI159688 /UG_TITLE=expressed sequence AI159688	-0.46859	-0.22788	0.40972	-0.89107	-1.0015	-0.87884	-0.88049	-0.29747	-0.30244	-0.92754	-0.8272	-0.80874
1434740_at	Scarf2	scavenger receptor class F, member 2	0007155 // cell adhesion // inferred from electronic annotation /// 0007157 // heterophilic cell adhesion // inferred from direct assay	0016020 // membrane // inferred from electronic annotation /// 0016021 // integral to membrane // inferred from electronic annotation	0004872 // receptor activity // inferred from electronic annotation /// 0005044 // scavenger receptor activity // inferred from direct assay /// 0005515 // protein binding // inferred from electronic annotation	---	gb:BB484759 /DB_XREF=gi:16441196 /DB_XREF=BB484759 /CLONE=D430027G05 /FEA=EST /CNT=28 /TID=Mm.33775.1 /TIER=Stack /STK=26 /UG=Mm.33775 /LL=106157 /UG_GENE=AI194363 /UG_TITLE=expressed sequence AI194363	0.089396	0.63828	0.60712	-0.057544	-0.07109	0.005759	-0.28858	-0.34707	-0.30147	-0.60384	-0.37958	-0.45304
1434797_at	6720469N11Rik	RIKEN cDNA 6720469N11 gene	---	---	---	---	gb:BB054275 /DB_XREF=gi:16259709 /DB_XREF=BB054275 /CLONE=6720469N11 /FEA=EST /CNT=30 /TID=Mm.89552.1 /TIER=Stack /STK=25 /UG=Mm.89552 /UG_TITLE=ESTs	-0.047356	0.28165	0.50293	-0.12127	-0.3998	-0.077498	-0.45305	-0.31883	-0.30395	-0.8873	-0.50663	-0.57218
1434931_at	Neo1	neogenin	0007155 // cell adhesion // inferred from electronic annotation /// 0007520 // myoblast fusion // inferred from mutant phenotype /// 0045449 // regulation of transcription // inferred from direct assay	0005886 // plasma membrane // inferred from electronic annotation /// 0016020 // membrane // inferred from electronic annotation /// 0016021 // integral to membrane // inferred from electronic annotation	0004872 // receptor activity // inferred from physical interaction /// 0005515 // protein binding // inferred from physical interaction /// 0005515 // protein binding // inferred from electronic annotation /// 0030528 // transcription regulator activity // inferred from direct assay /// 0045296 // cadherin binding // inferred from direct assay	---	gb:BB667778 /DB_XREF=gi:16399227 /DB_XREF=BB667778 /CLONE=C730040J06 /FEA=EST /CNT=51 /TID=Mm.45976.1 /TIER=Stack /STK=22 /UG=Mm.45976 /UG_TITLE=ESTs	-0.058598	0.090667	0.42598	-0.13073	-0.23939	-0.13309	-0.25137	-0.1795	-0.33818	-0.73612	-0.56868	-0.52235
1434957_at	Cdon	cell adhesion molecule-related/down-regulated by oncogenes	0001708 // cell fate specification // inferred from genetic interaction /// 0007224 // smoothened signaling pathway // inferred from genetic interaction /// 0007224 // smoothened signaling pathway // not recorded /// 0007224 // smoothened signaling pathway // inferred from electronic annotation /// 0007520 // myoblast fusion // inferred from mutant phenotype /// 0010172 // embryonic body morphoge…	0005887 // integral to plasma membrane // not recorded /// 0009986 // cell surface // traceable author statement /// 0009986 // cell surface // inferred from electronic annotation /// 0016020 // membrane // inferred from electronic annotation /// 0016021 // integral to membrane // inferred from electronic annotation	0005515 // protein binding // inferred from physical interaction /// 0005515 // protein binding // inferred from electronic annotation	---	gb:AW557006 /DB_XREF=gi:7202435 /DB_XREF=L0276B05-3 /CLONE=L0276B05 /FEA=EST /CNT=30 /TID=Mm.80509.1 /TIER=Stack /STK=22 /UG=Mm.80509 /UG_TITLE=ESTs	0.041706	0.40343	0.45329	-0.18337	-0.61539	-0.09354	-0.33161	-0.082147	-0.3373	-1.0069	-0.643	-0.54689
1435106_at	Limch1	LIM and calponin homology domains 1	0031032 // actomyosin structure organization // inferred from electronic annotation	---	0003779 // actin binding // inferred from electronic annotation /// 0008270 // zinc ion binding // inferred from electronic annotation /// 0046872 // metal ion binding // inferred from electronic annotation	---	gb:AV024662 /DB_XREF=gi:15431416 /DB_XREF=AV024662 /CLONE=1200006A12 /FEA=EST /CNT=25 /TID=Mm.24441.1 /TIER=Stack /STK=20 /UG=Mm.24441 /UG_TITLE=ESTs	-0.13699	-0.26006	0.20112	-0.22151	-0.41669	-0.62236	-0.38439	-0.3696	-0.55961	-0.7883	-0.56592	-0.83923
1435207_at	Dixdc1	DIX domain containing 1	0007275 // multicellular organismal development // inferred from electronic annotation /// 0016055 // Wnt receptor signaling pathway // inferred from electronic annotation	0005622 // intracellular // inferred from electronic annotation /// 0005737 // cytoplasm // inferred from electronic annotation /// 0005925 // focal adhesion // inferred from electronic annotation /// 0030054 // cell junction // inferred from electronic annotation	0003779 // actin binding // inferred from electronic annotation /// 0004871 // signal transducer activity // inferred from electronic annotation	---	gb:BB758432 /DB_XREF=gi:16189905 /DB_XREF=BB758432 /CLONE=G270098A02 /FEA=EST /CNT=32 /TID=Mm.41644.1 /TIER=Stack /STK=19 /UG=Mm.41644 /UG_TITLE=ESTs	-0.1686	-0.27757	0.48193	-0.40973	-0.30439	-0.19249	-0.22737	0.084922	-0.1371	-1.043	-0.64819	-0.73421
1435321_at	Limch1	LIM and calponin homology domains 1	0031032 // actomyosin structure organization // inferred from electronic annotation	---	0003779 // actin binding // inferred from electronic annotation /// 0008270 // zinc ion binding // inferred from electronic annotation /// 0046872 // metal ion binding // inferred from electronic annotation	---	gb:BM117827 /DB_XREF=gi:17080845 /DB_XREF=L0856H05-3 /CLONE=L0856H05 /FEA=EST /CNT=58 /TID=Mm.18830.1 /TIER=Stack /STK=17 /UG=Mm.18830 /UG_TITLE=ESTs, Weakly similar to LIM domain only 7 isoform a (Homo sapiens) (H.sapiens)	0.009536	-0.1822	0.28688	-0.070879	-0.33823	-0.43172	-0.28838	-0.38103	-0.59003	-0.66305	-0.58254	-0.65088
1435382_at	Ndn	necdin	0001558 // regulation of cell growth // traceable author statement /// 0001764 // neuron migration // inferred from mutant phenotype /// 0006350 // transcription // inferred from electronic annotation /// 0006355 // regulation of transcription, DNA-dependent // inferred from genetic interaction /// 0006874 // cellular calcium ion homeostasis // traceable author statement /// 0007409 // axonogenes…	0005634 // nucleus // inferred from direct assay /// 0005634 // nucleus // inferred from electronic annotation /// 0005654 // nucleoplasm // inferred from electronic annotation /// 0005737 // cytoplasm // inferred from direct assay /// 0005737 // cytoplasm // inferred from electronic annotation /// 0005813 // centrosome // inferred from direct assay /// 0016363 // nuclear matrix // inferred from …	0003677 // DNA binding // inferred from electronic annotation /// 0005102 // receptor binding // inferred from electronic annotation /// 0005515 // protein binding // inferred from physical interaction /// 0005515 // protein binding // inferred from electronic annotation /// 0008022 // protein C-terminus binding // inferred from electronic annotation /// 0042803 // protein homodimerization activi…	---	gb:AW743020 /DB_XREF=gi:7654827 /DB_XREF=up55e10.x1 /CLONE=IMAGE:2780010 /FEA=EST /CNT=20 /TID=Mm.7089.2 /TIER=Stack /STK=17 /UG=Mm.7089 /LL=17984 /UG_GENE=Ndn /UG_TITLE=necdin	-0.14915	0.27264	0.43587	-0.52943	-0.75455	-0.31116	-0.65263	-0.38631	-0.33904	-1.0354	-0.78417	-1.0623
1435383_x_at	Ndn	necdin	0001558 // regulation of cell growth // traceable author statement /// 0001764 // neuron migration // inferred from mutant phenotype /// 0006350 // transcription // inferred from electronic annotation /// 0006355 // regulation of transcription, DNA-dependent // inferred from genetic interaction /// 0006874 // cellular calcium ion homeostasis // traceable author statement /// 0007409 // axonogenes…	0005634 // nucleus // inferred from direct assay /// 0005634 // nucleus // inferred from electronic annotation /// 0005654 // nucleoplasm // inferred from electronic annotation /// 0005737 // cytoplasm // inferred from direct assay /// 0005737 // cytoplasm // inferred from electronic annotation /// 0005813 // centrosome // inferred from direct assay /// 0016363 // nuclear matrix // inferred from …	0003677 // DNA binding // inferred from electronic annotation /// 0005102 // receptor binding // inferred from electronic annotation /// 0005515 // protein binding // inferred from physical interaction /// 0005515 // protein binding // inferred from electronic annotation /// 0008022 // protein C-terminus binding // inferred from electronic annotation /// 0042803 // protein homodimerization activi…	---	gb:AW743020 /DB_XREF=gi:7654827 /DB_XREF=up55e10.x1 /CLONE=IMAGE:2780010 /FEA=EST /CNT=20 /TID=Mm.7089.2 /TIER=Stack /STK=17 /UG=Mm.7089 /LL=17984 /UG_GENE=Ndn /UG_TITLE=necdin	-0.071594	0.31787	0.4349	-0.43243	-0.70544	-0.32144	-0.59555	-0.23998	-0.31291	-1.097	-0.80543	-0.99447
1435493_at	Dsp	desmoplakin	---	0005739 // mitochondrion // inferred from direct assay /// 0016323 // basolateral plasma membrane // inferred from direct assay /// 0030057 // desmosome // inferred from direct assay	---	---	gb:AV297961 /DB_XREF=gi:16392994 /DB_XREF=AV297961 /CLONE=5730453H04 /FEA=EST /CNT=18 /TID=Mm.203911.1 /TIER=Stack /STK=16 /UG=Mm.203911 /LL=105072 /UG_GENE=AA407887 /UG_TITLE=expressed sequence AA407887	-0.16755	-0.61413	-0.39928	0.42653	0.31258	-0.10858	0.57608	0.48922	0.38571	0.50494	0.40663	0.81556
1435504_at	Clip4	CAP-GLY domain containing linker protein family, member 4	---	---	---	---	gb:BM217861 /DB_XREF=gi:17777216 /DB_XREF=C0903B02-3 /CLONE=C0903B02 /FEA=EST /CNT=17 /TID=Mm.141984.1 /TIER=Stack /STK=16 /UG=Mm.141984 /UG_TITLE=ESTs	1.195	1.341	1.285	0.44223	0.30662	0.56004	0.65851	0.89475	0.33925	0.049282	0.29207	-0.34702
1435710_at	AI661384	expressed sequence AI661384	---	---	---	---	gb:BB034038 /DB_XREF=gi:16258260 /DB_XREF=BB034038 /CLONE=5830488I19 /FEA=EST /CNT=15 /TID=Mm.30743.1 /TIER=Stack /STK=14 /UG=Mm.30743 /LL=106930 /UG_GENE=AI661384 /UG_TITLE=expressed sequence AI661384	0.027046	-0.12351	-0.43595	0.14662	0.2259	0.11307	0.35935	0.53821	0.42882	0.64996	0.60509	0.63123
1435714_x_at	Il17d /// LOC100046772	interleukin 17D /// similar to IL-17D	0006954 // inflammatory response // inferred from electronic annotation	0005576 // extracellular region // inferred from electronic annotation	0005125 // cytokine activity // inferred from electronic annotation	---	gb:BB809808 /DB_XREF=gi:16982437 /DB_XREF=BB809808 /CLONE=G730001B15 /FEA=EST /CNT=15 /TID=Mm.3409.1 /TIER=Stack /STK=14 /UG=Mm.3409 /LL=105520 /UG_GENE=AI462269 /UG_TITLE=expressed sequence AI462269	-0.10766	0.073766	0.15642	-0.34542	-0.44213	-0.40317	-0.5625	-0.14178	-0.41813	-0.86777	-0.88732	-0.79576
1435785_at	Ehd2	EH-domain containing 2	0006897 // endocytosis // inferred from direct assay /// 0030866 // cortical actin cytoskeleton organization // inferred from direct assay	0005624 // membrane fraction // inferred from direct assay /// 0005768 // endosome // inferred from electronic annotation /// 0005886 // plasma membrane // inferred from direct assay /// 0005886 // plasma membrane // inferred from electronic annotation /// 0016020 // membrane // inferred from direct assay /// 0016020 // membrane // inferred from electronic annotation /// 0019898 // extrinsic to m…	0000166 // nucleotide binding // inferred from electronic annotation /// 0003924 // GTPase activity // inferred from electronic annotation /// 0005509 // calcium ion binding // inferred from electronic annotation /// 0005515 // protein binding // inferred from physical interaction /// 0005524 // ATP binding // inferred from electronic annotation /// 0005525 // GTP binding // inferred from electro…	---	gb:AV245241 /DB_XREF=gi:15405243 /DB_XREF=AV245241 /CLONE=4831437C03 /FEA=EST /CNT=23 /TID=Mm.40638.1 /TIER=Stack /STK=13 /UG=Mm.40638 /UG_TITLE=ESTs	0.017152	0.65457	0.85657	-0.10333	-0.45817	-0.11675	-0.3516	-0.1581	-0.26271	-0.5457	-0.41571	-0.51326
1435985_at	Farp2	FERM, RhoGEF and pleckstrin domain protein 2	0007242 // intracellular signaling cascade // inferred from electronic annotation /// 0016322 // neuron remodeling // not recorded /// 0016322 // neuron remodeling // inferred from electronic annotation /// 0016601 // Rac protein signal transduction // not recorded /// 0016601 // Rac protein signal transduction // inferred from electronic annotation /// 0035023 // regulation of Rho protein signal…	0005622 // intracellular // inferred from electronic annotation /// 0005737 // cytoplasm // not recorded /// 0005737 // cytoplasm // inferred from electronic annotation /// 0005856 // cytoskeleton // inferred from electronic annotation /// 0019898 // extrinsic to membrane // inferred from electronic annotation	0005085 // guanyl-nucleotide exchange factor activity // inferred from electronic annotation /// 0005089 // Rho guanyl-nucleotide exchange factor activity // not recorded /// 0005089 // Rho guanyl-nucleotide exchange factor activity // inferred from electronic annotation /// 0005488 // binding // inferred from electronic annotation /// 0008092 // cytoskeletal protein binding // inferred from elec…	---	gb:BM232304 /DB_XREF=gi:17867574 /DB_XREF=K0321C04-3 /CLONE=K0321C04 /FEA=EST /CNT=13 /TID=Mm.38843.1 /TIER=Stack /STK=12 /UG=Mm.38843 /UG_TITLE=ESTs	-0.11783	0.24227	0.67619	-0.21677	-0.5253	-0.37297	-0.64161	-0.40609	-0.26666	-0.98902	-0.42466	-0.92767
1435990_at	Adamts2	a disintegrin-like and metallopeptidase (reprolysin type) with thrombospondin type 1 motif, 2	0006508 // proteolysis // inferred from electronic annotation /// 0007229 // integrin-mediated signaling pathway // inferred from electronic annotation /// 0007283 // spermatogenesis // inferred from mutant phenotype /// 0030199 // collagen fibril organization // inferred from mutant phenotype /// 0030324 // lung development // inferred from mutant phenotype /// 0030574 // collagen catabolic proc…	0005576 // extracellular region // inferred from electronic annotation /// 0005578 // proteinaceous extracellular matrix // inferred from electronic annotation /// 0031012 // extracellular matrix // inferred from direct assay /// 0031012 // extracellular matrix // inferred from electronic annotation	0004222 // metalloendopeptidase activity // inferred from electronic annotation /// 0008233 // peptidase activity // inferred from direct assay /// 0008233 // peptidase activity // inferred from electronic annotation /// 0008237 // metallopeptidase activity // inferred from electronic annotation /// 0008270 // zinc ion binding // inferred from electronic annotation /// 0016787 // hydrolase activi…	---	gb:BG073461 /DB_XREF=gi:12556030 /DB_XREF=H3122H02-3 /CLONE=H3122H02 /FEA=EST /CNT=17 /TID=Mm.23038.1 /TIER=Stack /STK=12 /UG=Mm.23038 /UG_TITLE=ESTs	0.36703	0.70666	1.0371	0.17991	-0.22945	-0.086128	-0.43421	-0.18685	-0.3657	-0.87294	-0.61014	-0.81762
1436029_at	Bicc1	bicaudal C homolog 1 (Drosophila)	0007275 // multicellular organismal development // inferred from electronic annotation	---	0003723 // RNA binding // not recorded /// 0003723 // RNA binding // inferred from electronic annotation	mRNA_processing_binding_Reactome // GenMAPP	gb:AW551930 /DB_XREF=gi:7197353 /DB_XREF=L0205G09-3 /CLONE=L0205G09 /FEA=EST /CNT=42 /TID=Mm.25695.2 /TIER=Stack /STK=11 /UG=Mm.25695 /LL=75189 /UG_GENE=4930533K18Rik /UG_TITLE=RIKEN cDNA 4930533K18 gene	0.21502	0.80967	0.94858	0.13339	-0.11096	0.19599	-0.37566	-0.041726	-0.24143	-0.63037	-0.4285	-0.35713
1436319_at	Sulf1	sulfatase 1	0006790 // sulfur metabolic process // not recorded /// 0006915 // apoptosis // inferred from electronic annotation /// 0008152 // metabolic process // inferred from electronic annotation	0005615 // extracellular space // not recorded /// 0005783 // endoplasmic reticulum // inferred from electronic annotation /// 0005794 // Golgi apparatus // inferred from electronic annotation /// 0005795 // Golgi stack // inferred from electronic annotation /// 0009986 // cell surface // inferred from electronic annotation /// 0009986 // cell surface // inferred from sequence or structural simil…	0003824 // catalytic activity // inferred from electronic annotation /// 0004065 // arylsulfatase activity // not recorded /// 0004065 // arylsulfatase activity // inferred from sequence or structural similarity /// 0005509 // calcium ion binding // inferred from electronic annotation /// 0008449 // N-acetylglucosamine-6-sulfatase activity // not recorded /// 0008484 // sulfuric ester hydrolase a…	---	gb:BB751459 /DB_XREF=gi:16155695 /DB_XREF=BB751459 /CLONE=G130205M14 /FEA=EST /CNT=32 /TID=Mm.77608.1 /TIER=Stack /STK=9 /UG=Mm.77608 /LL=98378 /UG_GENE=AI467640 /UG_TITLE=expressed sequence AI467640	0.16803	0.78095	0.87453	0.028908	-0.26162	-0.029563	-0.34644	-0.097428	-0.19525	-0.58573	-0.27134	-0.32426
1436326_at	Rora	RAR-related orphan receptor alpha	0006350 // transcription // inferred from electronic annotation /// 0006355 // regulation of transcription, DNA-dependent // inferred from direct assay /// 0006355 // regulation of transcription, DNA-dependent // inferred from electronic annotation /// 0006809 // nitric oxide biosynthetic process // inferred from mutant phenotype /// 0021702 // cerebellar Purkinje cell differentiation // inferred…	0005634 // nucleus // inferred from electronic annotation	0003677 // DNA binding // inferred from direct assay /// 0003677 // DNA binding // inferred from electronic annotation /// 0003700 // transcription factor activity // inferred from direct assay /// 0003700 // transcription factor activity // not recorded /// 0003700 // transcription factor activity // inferred from electronic annotation /// 0003707 // steroid hormone receptor activity // inferred…	Nuclear_Receptors // GenMAPP	gb:BB306272 /DB_XREF=gi:9006977 /DB_XREF=BB306272 /CLONE=B230207H20 /FEA=EST /CNT=34 /TID=Mm.88712.1 /TIER=Stack /STK=9 /UG=Mm.88712 /UG_TITLE=ESTs	0.24077	0.6152	0.82847	-0.055565	-0.01972	0.12873	-0.3416	0.19982	-0.42251	-0.58093	-0.36119	-0.49236
1436346_at	Cd109	CD109 antigen	---	0005576 // extracellular region // inferred from electronic annotation /// 0005615 // extracellular space // inferred from electronic annotation /// 0005886 // plasma membrane // inferred from electronic annotation /// 0016020 // membrane // inferred from electronic annotation /// 0031225 // anchored to membrane // inferred from electronic annotation	0004866 // endopeptidase inhibitor activity // inferred from electronic annotation /// 0004867 // serine-type endopeptidase inhibitor activity // inferred from electronic annotation /// 0005515 // protein binding // inferred from electronic annotation /// 0030414 // peptidase inhibitor activity // inferred from electronic annotation	---	gb:AV246882 /DB_XREF=gi:16387159 /DB_XREF=AV246882 /CLONE=4832419I01 /FEA=EST /CNT=20 /TID=Mm.220956.1 /TIER=Stack /STK=9 /UG=Mm.220956 /LL=102541 /UG_GENE=AI480638 /UG_TITLE=expressed sequence AI480638	-0.21263	0.14493	0.56277	-0.32359	-0.54511	-0.44414	-0.64198	-0.32086	-0.51099	-0.97796	-0.78302	-0.66932
1436413_at	Frk	fyn-related kinase	0006468 // protein amino acid phosphorylation // inferred from electronic annotation /// 0030154 // cell differentiation // inferred from electronic annotation	0005622 // intracellular // inferred from electronic annotation /// 0005737 // cytoplasm // inferred from electronic annotation	0000166 // nucleotide binding // inferred from electronic annotation /// 0004672 // protein kinase activity // inferred from electronic annotation /// 0004713 // protein tyrosine kinase activity // inferred from electronic annotation /// 0004715 // non-membrane spanning protein tyrosine kinase activity // inferred from electronic annotation /// 0005515 // protein binding // inferred from electron…	---	gb:BB831042 /DB_XREF=gi:17009285 /DB_XREF=BB831042 /CLONE=G930014O13 /FEA=EST /CNT=12 /TID=Mm.35407.1 /TIER=Stack /STK=9 /UG=Mm.35407 /UG_TITLE=ESTs, Weakly similar to SINGLE-STRAND RECOGNITION PROTEIN (D.melanogaster)	0.031981	0.4026	0.79774	-0.21541	-0.37751	0.030359	-0.27117	-0.039402	-0.030971	-0.78656	-0.53218	-0.67468
1436568_at	Jam2	junction adhesion molecule 2	---	0005886 // plasma membrane // inferred from electronic annotation /// 0005923 // tight junction // inferred from electronic annotation /// 0016020 // membrane // inferred from electronic annotation /// 0016021 // integral to membrane // inferred from electronic annotation /// 0030054 // cell junction // inferred from electronic annotation	---	---	gb:AU016127 /DB_XREF=gi:3371131 /DB_XREF=AU016127 /CLONE=J0720H11 /FEA=EST /CNT=19 /TID=Mm.25963.1 /TIER=Stack /STK=8 /UG=Mm.25963 /LL=106318 /UG_GENE=AU016127 /UG_TITLE=expressed sequence AU016127	-0.022597	-0.014456	0.53638	-0.39211	-0.63491	-0.37216	-0.31995	-0.12641	-0.15527	-0.94138	-0.45944	-0.7345
1436678_at	Sgcb	sarcoglycan, beta (dystrophin-associated glycoprotein)	0007010 // cytoskeleton organization // inferred from electronic annotation /// 0016044 // membrane organization // traceable author statement	0005737 // cytoplasm // inferred from electronic annotation /// 0005856 // cytoskeleton // inferred from electronic annotation /// 0005886 // plasma membrane // inferred from electronic annotation /// 0005887 // integral to plasma membrane // traceable author statement /// 0016012 // sarcoglycan complex // inferred from electronic annotation /// 0016020 // membrane // inferred from electronic ann…	---	---	gb:AI844814 /DB_XREF=gi:5488760 /DB_XREF=UI-M-AH1-agx-f-12-0-UI.s1 /CLONE=UI-M-AH1-agx-f-12-0-UI /FEA=EST /CNT=8 /TID=Mm.200820.1 /TIER=Stack /STK=8 /UG=Mm.200820 /LL=100745 /UG_GENE=AI844814 /UG_TITLE=expressed sequence AI844814	0.63826	0.7686	0.66091	0.23132	-0.12423	0.30868	0.23792	0.45569	0.19042	-0.44589	-0.0072875	-0.33761
1436736_x_at	D0H4S114	DNA segment, human D4S114	0017015 // regulation of transforming growth factor beta receptor signaling pathway // inferred from direct assay /// 0031103 // axon regeneration // inferred from electronic annotation /// 0045664 // regulation of neuron differentiation // inferred from electronic annotation	0005634 // nucleus // inferred from electronic annotation /// 0005737 // cytoplasm // inferred from electronic annotation	0005515 // protein binding // inferred from physical interaction	---	gb:BB369191 /DB_XREF=gi:9081020 /DB_XREF=BB369191 /CLONE=C130047C13 /FEA=EST /CNT=78 /TID=Mm.4919.2 /TIER=Stack /STK=78 /UG=Mm.4919 /LL=27528 /UG_GENE=D0H4S114 /UG_TITLE=DNA segment, human D4S114	0.17323	0.52923	1.0024	-0.12032	-0.46197	-0.27026	-0.68501	-0.40544	-0.19995	-1.2612	-1.0037	-1.3982
1436915_x_at	Laptm4b	lysosomal-associated protein transmembrane 4B	0006810 // transport // inferred from electronic annotation	0012505 // endomembrane system // inferred from electronic annotation /// 0016020 // membrane // inferred from electronic annotation /// 0016021 // integral to membrane // inferred from electronic annotation	---	---	gb:AU024771 /DB_XREF=gi:3395118 /DB_XREF=AU024771 /CLONE=J0460D05 /FEA=EST /CNT=37 /TID=Mm.197518.2 /TIER=Stack /STK=36 /UG=Mm.197518 /LL=114128 /UG_GENE=Laptm4b /UG_TITLE=lysosomal-associated protein transmembrane 4B	0.086656	0.51087	0.5698	-0.022179	-0.36714	-0.18307	-0.30312	0.079662	0.046447	-0.51126	-0.24136	-0.46325
1436917_s_at	Gpsm1	G-protein signalling modulator 1 (AGS3-like, C. elegans)	0007165 // signal transduction // inferred from electronic annotation /// 0007275 // multicellular organismal development // inferred from electronic annotation /// 0007399 // nervous system development // inferred from electronic annotation /// 0008277 // regulation of G-protein coupled receptor protein signaling pathway // inferred from electronic annotation /// 0030154 // cell differentiation …	0005737 // cytoplasm // inferred from electronic annotation /// 0005783 // endoplasmic reticulum // inferred from electronic annotation /// 0005794 // Golgi apparatus // inferred from electronic annotation /// 0005829 // cytosol // inferred from electronic annotation /// 0005886 // plasma membrane // inferred from electronic annotation /// 0016020 // membrane // inferred from electronic annotation	0005096 // GTPase activator activity // inferred from electronic annotation /// 0005488 // binding // inferred from electronic annotation /// 0005515 // protein binding // inferred from electronic annotation	---	gb:BB491018 /DB_XREF=gi:9449645 /DB_XREF=BB491018 /CLONE=D530019B07 /FEA=EST /CNT=36 /TID=Mm.31239.4 /TIER=Stack /STK=36 /UG=Mm.31239 /UG_TITLE=Mus musculus, clone IMAGE:5363182, mRNA, partial cds	-0.048087	0.27854	0.24261	-0.20404	-0.63823	-0.35287	-0.43468	0.0062673	-0.18311	-0.51999	-0.17064	-0.50294
1437060_at	Olfm4	olfactomedin 4	0007155 // cell adhesion // inferred from electronic annotation	0005576 // extracellular region // inferred from electronic annotation /// 0005615 // extracellular space // inferred from direct assay /// 0005615 // extracellular space // inferred from electronic annotation	0005515 // protein binding // inferred from electronic annotation	---	gb:AV290148 /DB_XREF=gi:16392247 /DB_XREF=AV290148 /CLONE=5131401H15 /FEA=EST /CNT=46 /TID=Mm.26456.1 /TIER=Stack /STK=27 /UG=Mm.26456 /UG_TITLE=ESTs	0.029273	-0.17453	-0.26734	0.52556	0.71066	0.78553	0.98889	0.98541	0.62483	1.5939	1.0273	1.1961
1437065_at	Zbtb20	zinc finger and BTB domain containing 20	0006350 // transcription // inferred from electronic annotation /// 0045449 // regulation of transcription // inferred from electronic annotation	0005622 // intracellular // inferred from electronic annotation /// 0005634 // nucleus // inferred from direct assay /// 0005634 // nucleus // inferred from electronic annotation	0003676 // nucleic acid binding // inferred from electronic annotation /// 0003677 // DNA binding // inferred from direct assay /// 0003677 // DNA binding // inferred from electronic annotation /// 0005515 // protein binding // inferred from electronic annotation /// 0008270 // zinc ion binding // inferred from electronic annotation /// 0046872 // metal ion binding // inferred from electronic ann…	---	gb:BF730713 /DB_XREF=gi:12048577 /DB_XREF=mab68c03.x1 /CLONE=IMAGE:3975532 /FEA=EST /CNT=65 /TID=Mm.31375.1 /TIER=Stack /STK=27 /UG=Mm.31375 /UG_TITLE=ESTs	-0.30672	0.10908	0.4786	-0.48987	-0.58315	-0.14764	-0.45833	-0.017289	-0.24699	-0.64675	-0.48883	-0.56143
1437231_at	Slitrk6	SLIT and NTRK-like family, member 6	0007409 // axonogenesis // inferred from direct assay	0016020 // membrane // inferred from electronic annotation /// 0016021 // integral to membrane // inferred from sequence or structural similarity /// 0016021 // integral to membrane // inferred from electronic annotation	0005515 // protein binding // inferred from electronic annotation	---	gb:AV246497 /DB_XREF=gi:16387108 /DB_XREF=AV246497 /CLONE=4832410J21 /FEA=EST /CNT=22 /TID=Mm.49728.1 /TIER=Stack /STK=22 /UG=Mm.49728 /UG_TITLE=ESTs	-0.324	0.24217	0.43341	-0.47078	-0.19051	-0.2444	-0.47861	-0.32167	-0.14027	-0.82748	-0.56637	-0.59386
1437291_at	2700081O15Rik	RIKEN cDNA 2700081O15 gene	---	0005622 // intracellular // inferred from electronic annotation	0008270 // zinc ion binding // inferred from electronic annotation	---	gb:AV131166 /DB_XREF=gi:16382621 /DB_XREF=AV131166 /CLONE=2700081O15 /FEA=EST /CNT=122 /TID=Mm.29565.1 /TIER=Stack /STK=20 /UG=Mm.29565 /LL=107135 /UG_GENE=AI255177 /UG_TITLE=expressed sequence AI255177	0.064055	0.082175	-0.018386	-0.30236	-0.43996	-0.011253	-0.28816	-0.1938	-0.28562	-0.58022	-0.5728	-0.57039
1437387_at	Susd5	sushi domain containing 5	---	---	---	---	gb:AV226398 /DB_XREF=gi:16385326 /DB_XREF=AV226398 /CLONE=3930402D03 /FEA=EST /CNT=19 /TID=Mm.184472.1 /TIER=Stack /STK=19 /UG=Mm.184472 /UG_TITLE=ESTs	-0.31687	-0.37763	0.15392	-0.67324	-0.73638	-0.55266	-0.67132	-0.34975	-0.40579	-1.5718	-1.1915	-1.1199
1437417_s_at	Gpc6	glypican 6	---	0005576 // extracellular region // inferred from electronic annotation /// 0005578 // proteinaceous extracellular matrix // inferred from electronic annotation /// 0005615 // extracellular space // inferred from electronic annotation /// 0005886 // plasma membrane // inferred from electronic annotation /// 0005887 // integral to plasma membrane // inferred from sequence or structural similarity /…	0043395 // heparan sulfate proteoglycan binding // inferred from electronic annotation	---	gb:BB493031 /DB_XREF=gi:16441751 /DB_XREF=BB493031 /CLONE=D530030P10 /FEA=EST /CNT=20 /TID=Mm.219112.1 /TIER=Stack /STK=18 /UG=Mm.219112 /UG_TITLE=ESTs, Weakly similar to S38170 SRP40 protein - yeast (Saccharomyces cerevisiae) (S.cerevisiae)	-0.26609	-0.051693	0.25075	-0.49659	-0.43475	-0.24691	-0.56132	-0.16831	-0.4549	-0.85677	-0.70288	-0.79091
1437556_at	Zfhx4	zinc finger homeodomain 4	0006350 // transcription // inferred from electronic annotation /// 0006355 // regulation of transcription, DNA-dependent // inferred from electronic annotation /// 0045449 // regulation of transcription // inferred from electronic annotation	0005622 // intracellular // inferred from electronic annotation /// 0005634 // nucleus // inferred from electronic annotation	0003676 // nucleic acid binding // inferred from electronic annotation /// 0003677 // DNA binding // inferred from electronic annotation /// 0003700 // transcription factor activity // inferred from electronic annotation /// 0008270 // zinc ion binding // inferred from electronic annotation /// 0030528 // transcription regulator activity // inferred from electronic annotation /// 0043565 // seque…	---	gb:BF147593 /DB_XREF=gi:11028915 /DB_XREF=us36b10.x1 /CLONE=IMAGE:3169147 /FEA=EST /CNT=30 /TID=Mm.133521.1 /TIER=Stack /STK=16 /UG=Mm.133521 /UG_TITLE=ESTs	-0.14732	0.17073	0.64815	-0.14157	-0.3655	-0.21326	-0.51166	-0.14621	-0.38292	-0.98262	-0.57253	-0.86151
1437687_x_at	Fkbp9	FK506 binding protein 9	0006457 // protein folding // inferred from direct assay /// 0006457 // protein folding // inferred from electronic annotation	0005783 // endoplasmic reticulum // inferred from direct assay /// 0005783 // endoplasmic reticulum // inferred from electronic annotation /// 0005788 // endoplasmic reticulum lumen // inferred from electronic annotation	0003755 // peptidyl-prolyl cis-trans isomerase activity // inferred from electronic annotation /// 0005509 // calcium ion binding // inferred from direct assay /// 0005509 // calcium ion binding // inferred from electronic annotation /// 0016853 // isomerase activity // inferred from electronic annotation	---	gb:BB026630 /DB_XREF=gi:8202989 /DB_XREF=BB026630 /CLONE=5330434F12 /FEA=EST /CNT=16 /TID=Mm.20943.3 /TIER=Stack /STK=15 /UG=Mm.20943 /LL=27055 /UG_GENE=Fkbp9 /UG_TITLE=FK506 binding protein 9	-0.03762	0.40498	0.59835	-0.15342	-0.50256	-0.2436	-0.71493	-0.3519	-0.37958	-1.0011	-0.7393	-0.89023
1437718_x_at	Fmod	fibromodulin	---	0005576 // extracellular region // inferred from electronic annotation /// 0005578 // proteinaceous extracellular matrix // inferred from electronic annotation	0005515 // protein binding // inferred from electronic annotation	---	gb:BB483571 /DB_XREF=gi:9401180 /DB_XREF=BB483571 /CLONE=D430021B16 /FEA=EST /CNT=15 /TID=Mm.41573.9 /TIER=Stack /STK=15 /UG=Mm.41573 /LL=14264 /UG_GENE=Fmod /UG_TITLE=fibromodulin	-0.031826	0.50516	0.31925	-0.59224	-0.93177	-0.2349	-0.92873	-0.99375	-0.73771	-1.9408	-1.5818	-1.3325
1437833_at	Ltbp3	latent transforming growth factor beta binding protein 3	0001501 // skeletal system development // inferred from mutant phenotype /// 0007179 // transforming growth factor beta receptor signaling pathway // inferred from mutant phenotype /// 0007179 // transforming growth factor beta receptor signaling pathway // inferred from physical interaction	0005576 // extracellular region // inferred from direct assay /// 0005576 // extracellular region // inferred from electronic annotation /// 0005578 // proteinaceous extracellular matrix // not recorded	0005488 // binding // inferred from electronic annotation /// 0005509 // calcium ion binding // inferred from electronic annotation /// 0019838 // growth factor binding // inferred from electronic annotation	---	gb:BB173900 /DB_XREF=gi:16269463 /DB_XREF=BB173900 /CLONE=A230048E14 /FEA=EST /CNT=14 /TID=Mm.153604.1 /TIER=Stack /STK=14 /UG=Mm.153604 /UG_TITLE=ESTs, Weakly similar to A57293 latent transforming growth factor beta-binding protein 3 precursor - mouse (M.musculus)	-0.066995	0.2916	0.67123	-0.18525	-0.22909	-0.041438	-0.39271	0.011837	-0.52363	-0.86675	-0.61272	-0.80098
1437853_x_at	Ndn	necdin	0001558 // regulation of cell growth // traceable author statement /// 0001764 // neuron migration // inferred from mutant phenotype /// 0006350 // transcription // inferred from electronic annotation /// 0006355 // regulation of transcription, DNA-dependent // inferred from genetic interaction /// 0006874 // cellular calcium ion homeostasis // traceable author statement /// 0007409 // axonogenes…	0005634 // nucleus // inferred from direct assay /// 0005634 // nucleus // inferred from electronic annotation /// 0005654 // nucleoplasm // inferred from electronic annotation /// 0005737 // cytoplasm // inferred from direct assay /// 0005737 // cytoplasm // inferred from electronic annotation /// 0005813 // centrosome // inferred from direct assay /// 0016363 // nuclear matrix // inferred from …	0003677 // DNA binding // inferred from electronic annotation /// 0005102 // receptor binding // inferred from electronic annotation /// 0005515 // protein binding // inferred from physical interaction /// 0005515 // protein binding // inferred from electronic annotation /// 0008022 // protein C-terminus binding // inferred from electronic annotation /// 0042803 // protein homodimerization activi…	---	gb:BB074430 /DB_XREF=gi:8584428 /DB_XREF=BB074430 /CLONE=9330015G11 /FEA=EST /CNT=14 /TID=Mm.7089.5 /TIER=Stack /STK=14 /UG=Mm.7089 /LL=17984 /UG_GENE=Ndn /UG_TITLE=necdin	-0.0072203	0.30339	0.54866	-0.12329	-0.31252	0.020052	-0.367	-0.20365	-0.2767	-0.5919	-0.54942	-0.58853
1438042_at	Shox2	short stature homeobox 2	0000122 // negative regulation of transcription from RNA polymerase II promoter // inferred from direct assay /// 0001649 // osteoblast differentiation // inferred from mutant phenotype /// 0002053 // positive regulation of mesenchymal cell proliferation // inferred from mutant phenotype /// 0002063 // chondrocyte development // inferred from mutant phenotype /// 0006355 // regulation of transcri…	0005634 // nucleus // inferred from electronic annotation	0003677 // DNA binding // inferred from electronic annotation /// 0003700 // transcription factor activity // inferred from electronic annotation /// 0030528 // transcription regulator activity // inferred from electronic annotation /// 0043565 // sequence-specific DNA binding // inferred from electronic annotation	---	gb:AV332957 /DB_XREF=gi:15406393 /DB_XREF=AV332957 /CLONE=6330543G17 /FEA=EST /CNT=19 /TID=Mm.130271.1 /TIER=Stack /STK=12 /UG=Mm.130271 /UG_TITLE=ESTs	-0.093708	0.118	0.7206	-0.27273	-0.44133	-0.41849	-0.6263	-0.12625	-0.23768	-0.89066	-0.53895	-0.80636
1438081_at	Mcc	mutated in colorectal cancers	---	---	0005509 // calcium ion binding // inferred from electronic annotation	---	gb:BB794635 /DB_XREF=gi:16964254 /DB_XREF=BB794635 /CLONE=G431001D24 /FEA=EST /CNT=15 /TID=Mm.210479.1 /TIER=Stack /STK=12 /UG=Mm.210479 /UG_TITLE=ESTs	-0.0099183	0.29228	0.3038	-0.4011	-0.78311	-0.16862	-0.4884	0.0033092	-0.1405	-0.81702	-0.55864	-0.61203
1438083_at	Hhip	Hedgehog-interacting protein	0007165 // signal transduction // inferred from direct assay /// 0007224 // smoothened signaling pathway // inferred from mutant phenotype /// 0007405 // neuroblast proliferation // inferred from genetic interaction /// 0009887 // organ morphogenesis // inferred from mutant phenotype /// 0009953 // dorsal/ventral pattern formation // inferred from genetic interaction /// 0030324 // lung developme…	0005576 // extracellular region // inferred from electronic annotation /// 0005886 // plasma membrane // inferred from electronic annotation /// 0005887 // integral to plasma membrane // inferred from direct assay /// 0009986 // cell surface // inferred from direct assay /// 0016020 // membrane // inferred from electronic annotation /// 0019898 // extrinsic to membrane // inferred from electronic…	0003824 // catalytic activity // inferred from electronic annotation /// 0005515 // protein binding // inferred from physical interaction	---	gb:BB773386 /DB_XREF=gi:16934066 /DB_XREF=BB773386 /CLONE=G430003C10 /FEA=EST /CNT=15 /TID=Mm.103739.2 /TIER=Stack /STK=12 /UG=Mm.103739 /LL=15245 /UG_GENE=Hhip /UG_TITLE=Hedgehog-interacting protein	-0.30744	-0.2601	-0.20984	-0.2463	-0.12379	-0.21181	-0.57058	-0.20735	-0.25972	-0.82001	-0.79375	-0.5971
1438091_a_at	Gm6722 /// H2afz	predicted gene 6722 /// H2A histone family, member Z	0006334 // nucleosome assembly // inferred from electronic annotation /// 0007275 // multicellular organismal development // inferred from electronic annotation	0000786 // nucleosome // inferred from electronic annotation /// 0001740 // Barr body // not recorded /// 0005634 // nucleus // inferred from direct assay /// 0005634 // nucleus // not recorded /// 0005634 // nucleus // inferred from electronic annotation /// 0005694 // chromosome // inferred from electronic annotation	0003677 // DNA binding // inferred from electronic annotation	---	gb:AV003424 /DB_XREF=gi:4780274 /DB_XREF=AV003424 /CLONE=0610027M19 /FEA=EST /CNT=14 /TID=Mm.916.5 /TIER=Stack /STK=12 /UG=Mm.916 /LL=51788 /UG_GENE=H2afz /UG_TITLE=H2A histone family, member Z	0.066924	-0.12456	-0.19568	0.43037	0.57664	0.50875	0.41958	0.22526	0.45367	0.61607	0.16467	0.36689
1438133_a_at	Cyr61	cysteine rich protein 61	0001558 // regulation of cell growth // inferred from electronic annotation /// 0002041 // intussusceptive angiogenesis // inferred from mutant phenotype /// 0006935 // chemotaxis // inferred from electronic annotation /// 0007155 // cell adhesion // inferred from electronic annotation /// 0010811 // positive regulation of cell-substrate adhesion // inferred from direct assay /// 0030198 // extra…	0005576 // extracellular region // inferred from electronic annotation	0005515 // protein binding // inferred from electronic annotation /// 0005520 // insulin-like growth factor binding // inferred from electronic annotation /// 0008201 // heparin binding // inferred from electronic annotation /// 0019838 // growth factor binding // inferred from electronic annotation /// 0050840 // extracellular matrix binding // inferred from direct assay	---	gb:BM202770 /DB_XREF=gi:17757100 /DB_XREF=C0244E04-3 /CLONE=C0244E04 /FEA=EST /CNT=12 /TID=Mm.1231.2 /TIER=Stack /STK=12 /UG=Mm.1231 /LL=16007 /UG_GENE=Cyr61 /UG_TITLE=cysteine rich protein 61	-0.10239	0.21152	0.13762	-0.15978	-0.64024	-0.22228	-0.50519	-0.31554	-0.59108	-0.68784	-0.62884	-0.84871
1438312_s_at	Ltbp3	latent transforming growth factor beta binding protein 3	0001501 // skeletal system development // inferred from mutant phenotype /// 0007179 // transforming growth factor beta receptor signaling pathway // inferred from mutant phenotype /// 0007179 // transforming growth factor beta receptor signaling pathway // inferred from physical interaction	0005576 // extracellular region // inferred from direct assay /// 0005576 // extracellular region // inferred from electronic annotation /// 0005578 // proteinaceous extracellular matrix // not recorded	0005488 // binding // inferred from electronic annotation /// 0005509 // calcium ion binding // inferred from electronic annotation /// 0019838 // growth factor binding // inferred from electronic annotation	---	gb:BB324823 /DB_XREF=gi:9033137 /DB_XREF=BB324823 /CLONE=B430111O16 /FEA=EST /CNT=12 /TID=Mm.182396.3 /TIER=Stack /STK=11 /UG=Mm.182396 /LL=78891 /UG_GENE=Ntkl /UG_TITLE=N-terminal kinase-like	0.31683	0.6627	0.72243	0.37206	-0.14868	0.032486	-0.1083	-0.023412	-0.44879	-0.51161	-0.44878	-0.44352
1438443_at	Zbtb20	zinc finger and BTB domain containing 20	0006350 // transcription // inferred from electronic annotation /// 0045449 // regulation of transcription // inferred from electronic annotation	0005622 // intracellular // inferred from electronic annotation /// 0005634 // nucleus // inferred from direct assay /// 0005634 // nucleus // inferred from electronic annotation	0003676 // nucleic acid binding // inferred from electronic annotation /// 0003677 // DNA binding // inferred from direct assay /// 0003677 // DNA binding // inferred from electronic annotation /// 0005515 // protein binding // inferred from electronic annotation /// 0008270 // zinc ion binding // inferred from electronic annotation /// 0046872 // metal ion binding // inferred from electronic ann…	---	gb:BB751546 /DB_XREF=gi:16155782 /DB_XREF=BB751546 /CLONE=G270001E19 /FEA=EST /CNT=20 /TID=Mm.16802.1 /TIER=Stack /STK=10 /UG=Mm.16802 /LL=28072 /UG_GENE=D16Wsu73e /UG_TITLE=DNA segment, Chr 16, Wayne State University 73, expressed	-0.016982	0.14752	0.59974	-0.092556	-0.1827	-0.080264	-0.33135	-0.048424	-0.30302	-0.60939	-0.54696	-0.58861
1438482_at	Wwp2	WW domain containing E3 ubiquitin protein ligase 2	0006464 // protein modification process // inferred from electronic annotation /// 0010629 // negative regulation of gene expression // inferred from electronic annotation /// 0016567 // protein ubiquitination // inferred from electronic annotation /// 0019941 // modification-dependent protein catabolic process // inferred from electronic annotation /// 0032410 // negative regulation of transport…	0005622 // intracellular // inferred from electronic annotation	0004842 // ubiquitin-protein ligase activity // inferred from electronic annotation /// 0005515 // protein binding // inferred from electronic annotation /// 0016874 // ligase activity // inferred from electronic annotation /// 0016881 // acid-amino acid ligase activity // inferred from electronic annotation	---	gb:BM244014 /DB_XREF=gi:17879284 /DB_XREF=K0705C11-3 /CLONE=K0705C11 /FEA=EST /CNT=17 /TID=Mm.139177.1 /TIER=Stack /STK=10 /UG=Mm.139177 /UG_TITLE=ESTs	-0.20917	-0.166	0.34092	-0.501	-0.55751	-0.49879	-0.44188	-0.34346	-0.27679	-0.55461	-0.54104	-0.52356
1438636_s_at	Susd5	sushi domain containing 5	---	---	---	---	gb:BB213765 /DB_XREF=gi:8878718 /DB_XREF=BB213765 /CLONE=A530013M15 /FEA=EST /CNT=10 /TID=Mm.49108.1 /TIER=Stack /STK=10 /UG=Mm.49108 /UG_TITLE=ESTs	-0.24831	-0.33712	0.24778	-0.3589	-0.62239	-0.54157	-0.59477	-0.49173	-0.44721	-1.307	-1.0694	-0.88816
1438651_a_at	Aplnr	apelin receptor	0007165 // signal transduction // inferred from electronic annotation /// 0007186 // G-protein coupled receptor protein signaling pathway // inferred from electronic annotation /// 0050878 // regulation of body fluid levels // inferred from electronic annotation	0005634 // nucleus // inferred from electronic annotation /// 0005886 // plasma membrane // inferred from electronic annotation /// 0016020 // membrane // inferred from electronic annotation /// 0016021 // integral to membrane // inferred from electronic annotation /// 0031410 // cytoplasmic vesicle // inferred from electronic annotation	0004871 // signal transducer activity // inferred from electronic annotation /// 0004872 // receptor activity // inferred from electronic annotation /// 0004930 // G-protein coupled receptor activity // inferred from electronic annotation	GPCRDB_Class_A_Rhodopsin-like // GenMAPP	gb:BB483357 /DB_XREF=gi:9400966 /DB_XREF=BB483357 /CLONE=D430019N22 /FEA=EST /CNT=10 /TID=Mm.29368.2 /TIER=Stack /STK=10 /UG=Mm.29368 /LL=23796 /UG_GENE=Agtrl1 /UG_TITLE=angiotensin receptor-like 1	0.20095	0.66283	0.85971	-0.092524	-0.42864	-0.096465	-0.37132	-0.42224	-0.46701	-0.69808	-0.88266	-1.1456
1438658_a_at	S1pr3	sphingosine-1-phosphate receptor 3	0001816 // cytokine production // inferred from mutant phenotype /// 0006954 // inflammatory response // inferred from mutant phenotype /// 0007165 // signal transduction // inferred from electronic annotation /// 0007186 // G-protein coupled receptor protein signaling pathway // inferred from electronic annotation /// 0007193 // inhibition of adenylate cyclase activity by G-protein signaling // …	0005886 // plasma membrane // inferred from electronic annotation /// 0005887 // integral to plasma membrane // traceable author statement /// 0016020 // membrane // inferred from electronic annotation /// 0016021 // integral to membrane // inferred from electronic annotation	0001619 // lysosphingolipid and lysophosphatidic acid receptor activity // inferred from electronic annotation /// 0004871 // signal transducer activity // inferred from electronic annotation /// 0004872 // receptor activity // inferred from electronic annotation /// 0004930 // G-protein coupled receptor activity // traceable author statement /// 0004930 // G-protein coupled receptor activity // …	S1P_Signaling // GenMAPP /// Small_ligand_GPCRs // GenMAPP	gb:AV238324 /DB_XREF=gi:6190835 /DB_XREF=AV238324 /CLONE=4732426N18 /FEA=EST /CNT=10 /TID=Mm.136736.2 /TIER=Stack /STK=10 /UG=Mm.136736 /LL=105115 /UG_GENE=AI132464 /UG_TITLE=expressed sequence AI132464	-0.23307	-0.15137	0.49904	-0.3463	-0.58196	-0.49478	-0.57478	-0.26039	-0.35808	-0.5933	-0.47267	-0.68762
1438702_at	Flrt2	fibronectin leucine rich transmembrane protein 2	---	0016021 // integral to membrane // inferred from electronic annotation	0005515 // protein binding // inferred from electronic annotation	---	gb:BG075699 /DB_XREF=gi:12558268 /DB_XREF=H3150E08-3 /CLONE=H3150E08 /FEA=EST /CNT=19 /TID=Mm.103204.1 /TIER=Stack /STK=9 /UG=Mm.103204 /UG_TITLE=ESTs	0.006718	0.51689	0.91946	0.03108	-0.35626	-0.13844	-0.56397	-0.21438	-0.53031	-0.68221	-0.41659	-0.70157
1438783_at	---	---	---	---	---	---	gb:BB325257 /DB_XREF=gi:16403556 /DB_XREF=BB325257 /CLONE=B430115G18 /FEA=EST /CNT=11 /TID=Mm.139190.1 /TIER=Stack /STK=9 /UG=Mm.139190 /UG_TITLE=ESTs	0.024035	0.522	0.6067	-0.075894	-0.3642	0.06598	-0.28051	-0.14423	-0.38116	-0.53879	-0.35166	-0.21525
1439373_x_at	Wnt5b	wingless-related MMTV integration site 5B	0007165 // signal transduction // traceable author statement /// 0007223 // Wnt receptor signaling pathway, calcium modulating pathway // inferred from electronic annotation /// 0007267 // cell-cell signaling // traceable author statement /// 0007275 // multicellular organismal development // inferred from electronic annotation /// 0009887 // organ morphogenesis // traceable author statement /// …	0005576 // extracellular region // inferred from electronic annotation /// 0005578 // proteinaceous extracellular matrix // inferred from electronic annotation	0004871 // signal transducer activity // inferred from electronic annotation /// 0005102 // receptor binding // traceable author statement /// 0005515 // protein binding // inferred from physical interaction	Wnt_Signaling // GenMAPP	gb:AV303043 /DB_XREF=gi:6335557 /DB_XREF=AV303043 /CLONE=5730508M05 /FEA=EST /CNT=8 /TID=Mm.22622.3 /TIER=Stack /STK=8 /UG=Mm.22622 /LL=22419 /UG_GENE=Wnt5b /UG_TITLE=wingless-related MMTV integration site 5B	-0.28813	-0.08676	0.26391	-0.20016	-0.43767	-0.27754	-0.58688	-0.59082	-0.51812	-0.90571	-0.93537	-0.84378
1439380_x_at	Meg3	maternally expressed 3	---	---	---	---	gb:BB093563 /DB_XREF=gi:8676810 /DB_XREF=BB093563 /CLONE=9430042P15 /FEA=EST /CNT=8 /TID=Mm.154560.3 /TIER=Stack /STK=8 /UG=Mm.154560 /LL=17263 /UG_GENE=Meg3 /UG_TITLE=maternally expressed gene 3	0.52046	1.3586	1.1578	0.27017	-0.096175	0.024579	-0.1761	-0.18577	-0.52099	-0.40199	-0.43934	-0.44658
1439753_x_at	Six4	sine oculis-related homeobox 4 homolog (Drosophila)	0006355 // regulation of transcription, DNA-dependent // inferred from electronic annotation /// 0007275 // multicellular organismal development // inferred from electronic annotation /// 0007519 // skeletal muscle tissue development // inferred from genetic interaction /// 0042472 // inner ear morphogenesis // inferred from genetic interaction /// 0045449 // regulation of transcription // inferr…	0005634 // nucleus // inferred by curator /// 0005634 // nucleus // inferred from direct assay /// 0005634 // nucleus // inferred from electronic annotation /// 0005737 // cytoplasm // inferred from electronic annotation	0003677 // DNA binding // inferred from direct assay /// 0003677 // DNA binding // inferred from electronic annotation /// 0003700 // transcription factor activity // inferred from direct assay /// 0003700 // transcription factor activity // inferred from electronic annotation /// 0030528 // transcription regulator activity // inferred from electronic annotation /// 0043565 // sequence-specific D…	---	gb:AI893638 /DB_XREF=gi:5599540 /DB_XREF=mn04a03.x1 /CLONE=IMAGE:536908 /FEA=EST /CNT=7 /TID=Mm.99555.1 /TIER=ConsEnd /STK=7 /UG=Mm.99555 /UG_TITLE=ESTs	0.5335	0.90444	0.94876	0.065892	0.30358	0.28954	0.27523	0.53638	0.15449	-0.40484	-0.010861	-0.69813
1439794_at	Ntn4	Netrin 4	0016322 // neuron remodeling // inferred from direct assay /// 0060668 // regulation of branching involved in salivary gland morphogenesis by extracellular matrix-epithelial cell signaling // inferred from direct assay	0005576 // extracellular region // inferred from electronic annotation /// 0005578 // proteinaceous extracellular matrix // inferred from electronic annotation /// 0005604 // basement membrane // inferred from direct assay /// 0005604 // basement membrane // inferred from sequence or structural similarity /// 0005604 // basement membrane // inferred from electronic annotation	0005515 // protein binding // inferred from electronic annotation /// 0043237 // laminin-1 binding // inferred from direct assay	---	gb:BQ086474 /DB_XREF=gi:20045678 /DB_XREF=ih89c07.x1 /CLONE=IMAGE:5939317 /FEA=EST /CNT=11 /TID=Mm.59574.1 /TIER=ConsEnd /STK=6 /UG=Mm.59574 /UG_TITLE=ESTs	-0.24321	0.065924	0.42018	-0.64391	-0.9441	-0.27263	-0.48758	0.10806	-0.59603	-0.44122	-0.3829	-0.41834
1439843_at	Camk4	calcium/calmodulin-dependent protein kinase IV	0006468 // protein amino acid phosphorylation // inferred from mutant phenotype /// 0006468 // protein amino acid phosphorylation // inferred from electronic annotation /// 0006913 // nucleocytoplasmic transport // inferred from direct assay /// 0007165 // signal transduction // inferred from direct assay /// 0007270 // nerve-nerve synaptic transmission // inferred from mutant phenotype	0005634 // nucleus // inferred from direct assay /// 0005634 // nucleus // inferred from electronic annotation /// 0005730 // nucleolus // inferred from electronic annotation /// 0005737 // cytoplasm // inferred from direct assay /// 0005737 // cytoplasm // inferred from electronic annotation	0000166 // nucleotide binding // inferred from electronic annotation /// 0004672 // protein kinase activity // inferred from electronic annotation /// 0004674 // protein serine/threonine kinase activity // inferred from electronic annotation /// 0004683 // calmodulin-dependent protein kinase activity // traceable author statement /// 0004683 // calmodulin-dependent protein kinase activity // infe…	Calcium_regulation_in_cardiac_cells // GenMAPP	gb:AI840829 /DB_XREF=gi:5475042 /DB_XREF=UI-M-AH0-adb-d-09-0-UI.s1 /CLONE=UI-M-AH0-adb-d-09-0-UI /FEA=EST /CNT=11 /TID=Mm.45058.1 /TIER=ConsEnd /STK=6 /UG=Mm.45058 /UG_TITLE=ESTs	0.027943	0.61144	0.58032	-0.13367	-0.254	0.07194	-0.32038	-0.10683	-0.39067	-0.60199	-0.72442	-0.54655
1439995_at	Nhedc2	Na+/H+ exchanger domain containing 2	0006810 // transport // inferred from electronic annotation /// 0006811 // ion transport // inferred from electronic annotation /// 0006812 // cation transport // inferred from electronic annotation /// 0006814 // sodium ion transport // inferred from electronic annotation /// 0015992 // proton transport // inferred from electronic annotation /// 0055085 // transmembrane transport // inferred fro…	0005739 // mitochondrion // inferred from electronic annotation /// 0016020 // membrane // inferred from electronic annotation /// 0016021 // integral to membrane // inferred from electronic annotation	0015078 // hydrogen ion transmembrane transporter activity // inferred from electronic annotation /// 0015297 // antiporter activity // inferred from electronic annotation /// 0015299 // solute:hydrogen antiporter activity // inferred from electronic annotation /// 0031402 // sodium ion binding // inferred from electronic annotation	---	gb:AV251613 /DB_XREF=gi:16387654 /DB_XREF=AV251613 /CLONE=4833432F11 /FEA=EST /CNT=7 /TID=Mm.25081.1 /TIER=ConsEnd /STK=6 /UG=Mm.25081 /LL=97086 /UG_GENE=C80638 /UG_TITLE=expressed sequence C80638	-0.37403	-0.11545	0.28106	-0.62935	-0.53744	-0.83421	-0.90725	-0.76579	-0.85773	-0.94079	-1.0457	-1.0145
1440026_at	---	---	---	---	---	---	gb:BM120634 /DB_XREF=gi:17088660 /DB_XREF=L0942B12-3 /CLONE=L0942B12 /FEA=EST /CNT=6 /TID=Mm.214553.1 /TIER=ConsEnd /STK=6 /UG=Mm.214553 /UG_TITLE=ESTs	-0.23361	0.19408	0.23388	-0.53918	-0.80531	-0.35109	-0.5317	-0.09989	-0.39043	-0.65618	-0.50939	-0.57096
1440396_at	---	---	---	---	---	---	gb:BG075893 /DB_XREF=gi:12558462 /DB_XREF=H3153A11-3 /CLONE=H3153A11 /FEA=EST /CNT=6 /TID=Mm.102831.1 /TIER=ConsEnd /STK=5 /UG=Mm.102831 /UG_TITLE=ESTs	0.20864	0.82871	0.76292	0.0094448	-0.033305	0.14504	-0.23595	0.12501	-0.052485	-0.50587	-0.33335	-0.37861
1440650_at	---	---	---	---	---	---	gb:BB503709 /DB_XREF=gi:16442643 /DB_XREF=BB503709 /CLONE=D630044M07 /FEA=EST /CNT=5 /TID=Mm.209871.1 /TIER=ConsEnd /STK=5 /UG=Mm.209871 /UG_TITLE=ESTs	-0.24856	-0.038677	0.15621	-0.33206	-0.36076	-0.21675	-0.41527	-0.28972	-0.63719	-0.56144	-0.5465	-0.68999
1440728_at	---	---	---	---	---	---	gb:BB283560 /DB_XREF=gi:8984009 /DB_XREF=BB283560 /CLONE=A930102K08 /FEA=EST /CNT=5 /TID=Mm.132443.1 /TIER=ConsEnd /STK=5 /UG=Mm.132443 /UG_TITLE=ESTs	-0.092908	0.071644	0.43441	-0.19855	-0.33647	-0.29974	-0.42048	0.059622	-0.29337	-0.57334	-0.53901	-0.6214
1440920_at	Mmp14	Matrix metallopeptidase 14 (membrane-inserted)	0001503 // ossification // inferred from electronic annotation /// 0001525 // angiogenesis // inferred from electronic annotation /// 0001541 // ovarian follicle development // inferred from electronic annotation /// 0001666 // response to hypoxia // inferred from electronic annotation /// 0001935 // endothelial cell proliferation // inferred from electronic annotation /// 0006508 // proteolysis …	0005578 // proteinaceous extracellular matrix // inferred from electronic annotation /// 0005737 // cytoplasm // inferred from electronic annotation /// 0016020 // membrane // inferred from electronic annotation /// 0016021 // integral to membrane // inferred from electronic annotation /// 0042470 // melanosome // inferred from electronic annotation	0004222 // metalloendopeptidase activity // inferred from electronic annotation /// 0005509 // calcium ion binding // inferred from electronic annotation /// 0005515 // protein binding // inferred from electronic annotation /// 0008233 // peptidase activity // inferred from electronic annotation /// 0008237 // metallopeptidase activity // inferred from electronic annotation /// 0008270 // zinc io…	Matrix_Metalloproteinases // GenMAPP	gb:BB535404 /DB_XREF=gi:16446544 /DB_XREF=BB535404 /CLONE=E030043F24 /FEA=EST /CNT=10 /TID=Mm.209850.1 /TIER=ConsEnd /STK=4 /UG=Mm.209850 /UG_TITLE=ESTs	0.12641	0.75913	0.9989	-0.14655	-0.49688	-0.19173	-0.59543	-0.48804	-0.56367	-0.78979	-0.57506	-0.6457
1440962_at	Slc8a3	solute carrier family 8 (sodium/calcium exchanger), member 3	0006816 // calcium ion transport // inferred from electronic annotation /// 0007154 // cell communication // inferred from electronic annotation /// 0030001 // metal ion transport // inferred from direct assay /// 0055085 // transmembrane transport // inferred from electronic annotation	0005887 // integral to plasma membrane // inferred by curator /// 0016020 // membrane // inferred from electronic annotation /// 0016021 // integral to membrane // inferred from electronic annotation	0005432 // calcium:sodium antiporter activity // inferred from electronic annotation /// 0015368 // calcium:cation antiporter activity // inferred from direct assay	Calcium_regulation_in_cardiac_cells // GenMAPP	gb:AV361504 /DB_XREF=gi:16397503 /DB_XREF=AV361504 /CLONE=7530427O07 /FEA=EST /CNT=11 /TID=Mm.150437.1 /TIER=ConsEnd /STK=4 /UG=Mm.150437 /LL=105046 /UG_GENE=AW742262 /UG_TITLE=expressed sequence AW742262	-0.10815	-0.23194	0.56311	-0.46542	-0.68677	-0.51112	-0.62235	-0.2659	-0.21957	-1.1447	-0.84107	-1.1615
1441030_at	Rai14	retinoic acid induced 14	---	0005737 // cytoplasm // inferred from electronic annotation /// 0005739 // mitochondrion // inferred from direct assay /// 0005856 // cytoskeleton // inferred from electronic annotation /// 0005938 // cell cortex // inferred from electronic annotation	0005515 // protein binding // inferred from electronic annotation	---	gb:BB308974 /DB_XREF=gi:16402460 /DB_XREF=BB308974 /CLONE=B230308H11 /FEA=EST /CNT=6 /TID=Mm.166793.1 /TIER=ConsEnd /STK=4 /UG=Mm.166793 /UG_TITLE=ESTs	-0.19358	0.18995	0.69816	-0.37189	-0.53893	-0.16005	-0.411	-0.10441	-0.44098	-0.62781	-0.42126	-0.42572
1441241_at	9630013D21Rik	RIKEN cDNA 9630013D21 gene	---	---	---	---	gb:BB126309 /DB_XREF=gi:16262269 /DB_XREF=BB126309 /CLONE=9630013D21 /FEA=EST /CNT=5 /TID=Mm.119546.1 /TIER=ConsEnd /STK=4 /UG=Mm.119546 /UG_TITLE=ESTs	-0.50323	-0.40134	-0.18581	-0.43031	-0.022551	0.086947	-0.53326	-0.40793	-0.22003	-0.54655	-0.51717	-0.51573
1441870_s_at	Pkd2	polycystic kidney disease 2	0001822 // kidney development // inferred from mutant phenotype /// 0001892 // embryonic placenta development // inferred from mutant phenotype /// 0006810 // transport // inferred from electronic annotation /// 0006811 // ion transport // inferred from electronic annotation /// 0006816 // calcium ion transport // inferred from mutant phenotype /// 0006874 // cellular calcium ion homeostasis // i…	0002133 // polycystin complex // inferred from direct assay /// 0005783 // endoplasmic reticulum // inferred from direct assay /// 0005783 // endoplasmic reticulum // inferred from mutant phenotype /// 0005783 // endoplasmic reticulum // traceable author statement /// 0005886 // plasma membrane // inferred from direct assay /// 0005929 // cilium // inferred from direct assay /// 0005932 // microt…	0005102 // receptor binding // inferred from physical interaction /// 0005216 // ion channel activity // inferred from electronic annotation /// 0005262 // calcium channel activity // inferred from direct assay /// 0005262 // calcium channel activity // traceable author statement /// 0005267 // potassium channel activity // inferred from direct assay /// 0005509 // calcium ion binding // inferred…	---	gb:BB249222 /DB_XREF=gi:8941968 /DB_XREF=BB249222 /CLONE=A730031L01 /FEA=EST /CNT=4 /TID=Mm.208298.1 /TIER=ConsEnd /STK=4 /UG=Mm.208298 /UG_TITLE=ESTs	0.10709	0.74589	0.77806	-0.050503	-0.47633	-0.19541	-0.45439	-0.10982	-0.40219	-0.58462	-0.40687	-0.44249
1442740_at	Prdm5	PR domain containing 5	0000278 // mitotic cell cycle // inferred from electronic annotation /// 0000278 // mitotic cell cycle // inferred from sequence or structural similarity /// 0006350 // transcription // inferred from electronic annotation /// 0016568 // chromatin modification // inferred from electronic annotation /// 0016575 // histone deacetylation // inferred from electronic annotation /// 0016575 // histone d…	0005622 // intracellular // inferred from electronic annotation /// 0005634 // nucleus // inferred from electronic annotation /// 0005634 // nucleus // inferred from sequence or structural similarity	0003676 // nucleic acid binding // inferred from electronic annotation /// 0003677 // DNA binding // inferred from electronic annotation /// 0008270 // zinc ion binding // inferred from electronic annotation /// 0010843 // promoter binding // inferred from electronic annotation /// 0010843 // promoter binding // inferred from sequence or structural similarity /// 0016566 // specific transcription…	---	gb:BM219213 /DB_XREF=gi:17778961 /DB_XREF=C0921G04-3 /CLONE=C0921G04 /FEA=EST /CNT=4 /TID=Mm.218438.1 /TIER=ConsEnd /STK=3 /UG=Mm.218438 /UG_TITLE=ESTs, Moderately similar to RIKEN cDNA 5730493B19 (Mus musculus) (M.musculus)	-0.10103	0.37614	0.79122	-0.21633	-0.62794	-0.29325	-0.40717	-0.044903	0.0017313	-0.58688	-0.33517	-0.52752
1442812_at	Gm10482	predicted gene 10482	---	---	---	---	gb:BB155332 /DB_XREF=gi:15409038 /DB_XREF=BB155332 /CLONE=A130024J23 /FEA=EST /CNT=5 /TID=Mm.115442.1 /TIER=ConsEnd /STK=3 /UG=Mm.115442 /UG_TITLE=ESTs, Weakly similar to S16783 probable RNA-directed DNA polymerase (R.norvegicus)	0.22356	0.46582	0.1012	1.0271	1.4229	0.71062	-0.048198	0.06465	0.44904	-0.019315	0.4171	-0.033449
1442903_at	4732423E21Rik	RIKEN cDNA 4732423E21 gene	---	---	---	---	gb:AV237721 /DB_XREF=gi:16386380 /DB_XREF=AV237721 /CLONE=4732423E21 /FEA=EST /CNT=4 /TID=Mm.208297.1 /TIER=ConsEnd /STK=3 /UG=Mm.208297 /UG_TITLE=ESTs	-0.2025	0.05069	0.30073	-0.55695	-0.77067	-0.25014	-0.40453	-0.12348	-0.42389	-0.56949	-0.37068	-0.56038
1443161_at	---	---	---	---	---	---	gb:BM240648 /DB_XREF=gi:17875918 /DB_XREF=K0605C04-3 /CLONE=K0605C04 /FEA=EST /CNT=3 /TID=Mm.216164.1 /TIER=ConsEnd /STK=3 /UG=Mm.216164 /UG_TITLE=ESTs	-0.069194	0.2909	0.24789	-0.26688	-0.52131	-0.3453	-0.50273	-0.18688	-0.18588	-0.56114	-0.40834	-0.51008
1443471_at	Zbtb20	zinc finger and BTB domain containing 20	0006350 // transcription // inferred from electronic annotation /// 0045449 // regulation of transcription // inferred from electronic annotation	0005622 // intracellular // inferred from electronic annotation /// 0005634 // nucleus // inferred from direct assay /// 0005634 // nucleus // inferred from electronic annotation	0003676 // nucleic acid binding // inferred from electronic annotation /// 0003677 // DNA binding // inferred from direct assay /// 0003677 // DNA binding // inferred from electronic annotation /// 0005515 // protein binding // inferred from electronic annotation /// 0008270 // zinc ion binding // inferred from electronic annotation /// 0046872 // metal ion binding // inferred from electronic ann…	---	gb:BB087247 /DB_XREF=gi:16260932 /DB_XREF=BB087247 /CLONE=9430009A01 /FEA=EST /CNT=3 /TID=Mm.213242.1 /TIER=ConsEnd /STK=3 /UG=Mm.213242 /UG_TITLE=ESTs	-0.22341	0.023571	0.28768	-0.42211	-0.49756	-0.20261	-0.75179	-0.31719	-0.41159	-0.77433	-0.74902	-0.73864
1443687_x_at	H2-DMb2	histocompatibility 2, class II, locus Mb2	0002504 // antigen processing and presentation of peptide or polysaccharide antigen via MHC class II // inferred from electronic annotation /// 0006955 // immune response // inferred from electronic annotation /// 0019882 // antigen processing and presentation // inferred from direct assay /// 0019882 // antigen processing and presentation // not recorded /// 0019882 // antigen processing and pre…	0005764 // lysosome // inferred from direct assay /// 0005765 // lysosomal membrane // inferred from direct assay /// 0005770 // late endosome // inferred from direct assay /// 0005771 // multivesicular body // inferred from direct assay /// 0010008 // endosome membrane // inferred from direct assay /// 0016020 // membrane // inferred from electronic annotation /// 0016021 // integral to membrane…	0005515 // protein binding // inferred from physical interaction	---	gb:BB734586 /DB_XREF=gi:16133736 /DB_XREF=BB734586 /CLONE=F420010L19 /FEA=EST /CNT=3 /TID=Mm.218251.1 /TIER=ConsEnd /STK=3 /UG=Mm.218251 /UG_TITLE=ESTs, Weakly similar to TYROSINE-PROTEIN KINASE JAK3 (M.musculus)	0.22813	0.17981	-0.1311	0.5322	0.61611	0.2741	0.47721	0.29446	-0.0425	0.74895	0.48184	0.52653
1443882_at	---	---	---	---	---	---	gb:BI150812 /DB_XREF=gi:14610813 /DB_XREF=602914710F1 /CLONE=IMAGE:5065274 /FEA=EST /CNT=13 /TID=Mm.215863.1 /TIER=ConsEnd /STK=2 /UG=Mm.215863 /UG_TITLE=ESTs, Weakly similar to TYROSINE-PROTEIN KINASE JAK3 (M.musculus)	-0.41412	-0.34306	0.32452	-0.82232	-1.3068	-0.62668	-0.65056	-0.36035	-0.44834	-0.76786	-0.60152	-0.75966
1444029_at	Parp11	poly (ADP-ribose) polymerase family, member 11	---	0005634 // nucleus // inferred from electronic annotation	0003950 // NAD+ ADP-ribosyltransferase activity // inferred from electronic annotation /// 0016740 // transferase activity // inferred from electronic annotation /// 0016757 // transferase activity, transferring glycosyl groups // inferred from electronic annotation	---	gb:BB028141 /DB_XREF=gi:15403524 /DB_XREF=BB028141 /CLONE=5330440K11 /FEA=EST /CNT=6 /TID=Mm.110818.1 /TIER=ConsEnd /STK=2 /UG=Mm.110818 /UG_TITLE=ESTs	-0.3268	0.086152	0.43099	-0.67117	-0.47999	-0.63633	-0.62228	-0.70368	-0.33387	-0.79558	-0.53463	-0.76499
1444207_at	Alms1	Alstrom syndrome 1 homolog (human)	0001678 // cellular glucose homeostasis // not recorded /// 0006629 // lipid metabolic process // inferred from mutant phenotype /// 0006641 // triglyceride metabolic process // inferred from mutant phenotype /// 0006915 // apoptosis // inferred from mutant phenotype /// 0007286 // spermatid development // inferred from mutant phenotype /// 0007605 // sensory perception of sound // inferred from …	0005737 // cytoplasm // inferred from electronic annotation /// 0005813 // centrosome // not recorded /// 0005813 // centrosome // inferred from electronic annotation /// 0005929 // cilium // inferred from electronic annotation /// 0005932 // microtubule basal body // inferred from electronic annotation /// 0042995 // cell projection // inferred from electronic annotation	---	---	gb:BM070003 /DB_XREF=gi:16910555 /DB_XREF=id79f01.x1 /CLONE=IMAGE:5669497 /FEA=EST /CNT=5 /TID=Mm.186929.1 /TIER=ConsEnd /STK=2 /UG=Mm.186929 /UG_TITLE=ESTs	0.22266	0.41214	-0.096357	0.78692	1.2565	0.6204	0.29678	-0.082623	0.29277	0.31332	0.25286	0.1643
1444302_at	Glt8d4 /// LOC100048436	glycosyltransferase 8 domain containing 4 /// similar to CDNA sequence BC049816	---	0016020 // membrane // inferred from electronic annotation /// 0016021 // integral to membrane // inferred from electronic annotation	0016740 // transferase activity // inferred from electronic annotation /// 0016757 // transferase activity, transferring glycosyl groups // inferred from electronic annotation	---	gb:AV278332 /DB_XREF=gi:16391147 /DB_XREF=AV278332 /CLONE=4933401F19 /FEA=EST /CNT=5 /TID=Mm.61160.1 /TIER=ConsEnd /STK=2 /UG=Mm.61160 /UG_TITLE=ESTs, Weakly similar to PRP2 RAT ACIDIC PROLINE-RICH PROTEIN PRP25 PRECURSOR (R.norvegicus)	0.016854	0.57518	0.84567	-0.11558	-0.25865	-0.072857	-0.36003	-0.088387	-0.42532	-0.68819	-0.48464	-0.69784
1445233_at	Rhbdl2	rhomboid, veinlet-like 2 (Drosophila)	0007165 // signal transduction // inferred from electronic annotation	0016021 // integral to membrane // inferred from electronic annotation	0004252 // serine-type endopeptidase activity // inferred from electronic annotation	---	gb:BM120331 /DB_XREF=gi:17088357 /DB_XREF=L0938B03-3 /CLONE=L0938B03 /FEA=EST /CNT=3 /TID=Mm.218618.1 /TIER=ConsEnd /STK=2 /UG=Mm.218618 /UG_TITLE=ESTs	-0.26101	-0.12769	0.4637	-0.3	-0.38354	-0.36123	-0.51225	-0.31292	-0.19668	-0.63246	-0.55319	-0.64052
1447623_s_at	Prkd1	protein kinase D1	0006468 // protein amino acid phosphorylation // inferred from electronic annotation /// 0007242 // intracellular signaling cascade // inferred from electronic annotation	0005737 // cytoplasm // inferred from electronic annotation /// 0016020 // membrane // inferred from electronic annotation	0000166 // nucleotide binding // inferred from electronic annotation /// 0004672 // protein kinase activity // inferred from electronic annotation /// 0004674 // protein serine/threonine kinase activity // inferred from electronic annotation /// 0004697 // protein kinase C activity // inferred from electronic annotation /// 0005515 // protein binding // inferred from electronic annotation /// 000…	Calcium_regulation_in_cardiac_cells // GenMAPP /// G_Protein_Signaling // GenMAPP /// Smooth_muscle_contraction // GenMAPP /// Wnt_Signaling // GenMAPP	gb:AV297026 /DB_XREF=gi:6329045 /DB_XREF=AV297026 /CLONE=5730446C07 /FEA=EST /CNT=2 /TID=Mm.141983.1 /TIER=ConsEnd /STK=2 /UG=Mm.141983 /UG_TITLE=ESTs	-0.20985	0.29691	0.50788	-0.34024	-0.39367	-0.25514	-0.60808	-0.1934	-0.35864	-1.1469	-0.72441	-0.96294
1447676_x_at	S100a16	S100 calcium binding protein A16	0051592 // response to calcium ion // inferred from direct assay	0005634 // nucleus // inferred from direct assay /// 0005730 // nucleolus // not recorded /// 0005737 // cytoplasm // inferred from direct assay	0005509 // calcium ion binding // inferred from direct assay /// 0005509 // calcium ion binding // inferred from electronic annotation /// 0042803 // protein homodimerization activity // inferred from direct assay	---	gb:AV074236 /DB_XREF=gi:5194064 /DB_XREF=AV074236 /CLONE=2210008G08 /FEA=EST /CNT=2 /TID=Mm.140183.1 /TIER=ConsEnd /STK=2 /UG=Mm.140183 /UG_TITLE=ESTs	-0.00077783	0.52942	0.62732	-0.17919	-0.4252	-0.16445	-0.39381	-0.33441	-0.53275	-0.58473	-0.33884	-0.497
1447693_s_at	Neo1	neogenin	0007155 // cell adhesion // inferred from electronic annotation /// 0007520 // myoblast fusion // inferred from mutant phenotype /// 0045449 // regulation of transcription // inferred from direct assay	0005886 // plasma membrane // inferred from electronic annotation /// 0016020 // membrane // inferred from electronic annotation /// 0016021 // integral to membrane // inferred from electronic annotation	0004872 // receptor activity // inferred from physical interaction /// 0005515 // protein binding // inferred from physical interaction /// 0005515 // protein binding // inferred from electronic annotation /// 0030528 // transcription regulator activity // inferred from direct assay /// 0045296 // cadherin binding // inferred from direct assay	---	gb:BB350308 /DB_XREF=gi:9062136 /DB_XREF=BB350308 /CLONE=B930079E19 /FEA=EST /CNT=2 /TID=Mm.132212.1 /TIER=ConsEnd /STK=2 /UG=Mm.132212 /UG_TITLE=ESTs	0.086387	0.11296	0.43673	-0.11015	-0.44488	-0.24172	-0.31786	-0.095894	-0.42753	-0.90178	-0.75222	-0.7356
1447915_x_at	Tmem204	transmembrane protein 204	---	0005886 // plasma membrane // inferred from electronic annotation /// 0005912 // adherens junction // inferred from electronic annotation /// 0016020 // membrane // inferred from electronic annotation /// 0016021 // integral to membrane // inferred from electronic annotation /// 0030054 // cell junction // inferred from electronic annotation	---	---	gb:AV366661 /DB_XREF=gi:6414308 /DB_XREF=AV366661 /CLONE=8430422K07 /FEA=EST /CNT=2 /TID=Mm.92697.1 /TIER=ConsEnd /STK=2 /UG=Mm.92697 /UG_TITLE=ESTs	-0.11642	0.095433	0.44883	-0.3153	-0.62129	-0.59139	-0.41035	-0.23059	-0.47906	-0.7028	-0.22	-0.63646
1448136_at	Enpp2	ectonucleotide pyrophosphatase/phosphodiesterase 2	0006935 // chemotaxis // inferred from electronic annotation /// 0006955 // immune response // inferred from electronic annotation /// 0008152 // metabolic process // inferred from electronic annotation /// 0016042 // lipid catabolic process // inferred from electronic annotation	0005576 // extracellular region // inferred from electronic annotation /// 0005887 // integral to plasma membrane // inferred from sequence or structural similarity	0003676 // nucleic acid binding // inferred from electronic annotation /// 0003824 // catalytic activity // inferred from electronic annotation /// 0004528 // phosphodiesterase I activity // inferred from sequence or structural similarity /// 0004551 // nucleotide diphosphatase activity // inferred from sequence or structural similarity /// 0005044 // scavenger receptor activity // inferred from …	---	gb:BC003264.1 /DB_XREF=gi:13096936 /FEA=FLmRNA /CNT=373 /TID=Mm.28107.1 /TIER=FL+Stack /STK=178 /UG=Mm.28107 /LL=18606 /UG_GENE=Enpp2 /DEF=Mus musculus, ectonucleotide pyrophosphatasephosphodiesterase 2, clone MGC:6665 IMAGE:3499038, mRNA, complete cds. /PROD=ectonucleotide pyrophosphatasephosphodiesterase2 /FL=gb:BC003264.1 gb:AF123542.1 gb:NM_015744.1	-0.18816	0.12593	0.40867	-0.083777	-0.46265	-0.24779	-0.4789	-0.51686	-0.57688	-0.98486	-0.78215	-0.83851
1448250_at	9030425E11Rik	RIKEN cDNA 9030425E11 gene	---	0005624 // membrane fraction // inferred from electronic annotation /// 0005634 // nucleus // inferred from electronic annotation /// 0005737 // cytoplasm // inferred from electronic annotation /// 0005886 // plasma membrane // inferred from electronic annotation /// 0005923 // tight junction // inferred from electronic annotation /// 0016020 // membrane // inferred from electronic annotation ///…	---	---	gb:NM_133733.1 /DB_XREF=gi:19526927 /GEN=9030425E11Rik /FEA=FLmRNA /CNT=196 /TID=Mm.41765.1 /TIER=FL+Stack /STK=113 /UG=Mm.41765 /LL=71566 /DEF=Mus musculus RIKEN cDNA 9030425E11 gene (9030425E11Rik), mRNA. /PROD=RIKEN cDNA 9030425E11 /FL=gb:BC026447.1 gb:AB040490.1 gb:NM_133733.1	-0.11414	0.46089	0.67067	-0.34308	-0.35623	-0.11707	-0.44531	-0.26657	-0.57027	-0.77064	-0.62532	-0.63203
1448259_at	Fstl1	follistatin-like 1	---	0005576 // extracellular region // inferred from electronic annotation	0005509 // calcium ion binding // inferred from electronic annotation /// 0008201 // heparin binding // inferred from electronic annotation	---	gb:BI452727 /DB_XREF=gi:15243383 /DB_XREF=603169945F1 /CLONE=IMAGE:5249386 /FEA=FLmRNA /CNT=393 /TID=Mm.22763.1 /TIER=Stack /STK=69 /UG=Mm.22763 /LL=14314 /UG_GENE=Fstl /UG_TITLE=follistatin-like /FL=gb:M91380.1 gb:NM_008047.1	0.76124	1.7236	1.423	0.48439	0.074245	0.46712	-0.289	-0.087336	-0.35481	-0.55881	-0.42966	-0.45306
1448288_at	Nfib	nuclear factor I/B	0006260 // DNA replication // inferred from electronic annotation /// 0006350 // transcription // inferred from electronic annotation /// 0006355 // regulation of transcription, DNA-dependent // inferred from electronic annotation /// 0008285 // negative regulation of cell proliferation // inferred from mutant phenotype /// 0030324 // lung development // inferred from mutant phenotype /// 0030900…	0005622 // intracellular // inferred from electronic annotation /// 0005634 // nucleus // inferred from electronic annotation	0003677 // DNA binding // inferred from electronic annotation /// 0003690 // double-stranded DNA binding // inferred from electronic annotation /// 0003700 // transcription factor activity // inferred from electronic annotation /// 0016563 // transcription activator activity // inferred from direct assay	---	gb:BB832504 /DB_XREF=gi:17010747 /DB_XREF=BB832504 /CLONE=G930022H03 /FEA=FLmRNA /CNT=189 /TID=Mm.4025.1 /TIER=Stack /STK=12 /UG=Mm.4025 /LL=18028 /UG_GENE=Nfib /UG_TITLE=nuclear factor IB /FL=gb:U57634.1 gb:NM_008687.1	0.26571	0.53215	0.66365	0.080349	-0.26695	-0.049453	-0.070794	0.016144	-0.24465	-0.56969	-0.3634	-0.57628
1448392_at	Sparc	secreted acidic cysteine rich glycoprotein	0007165 // signal transduction // inferred from electronic annotation /// 0042127 // regulation of cell proliferation // inferred from genetic interaction	0005576 // extracellular region // inferred from electronic annotation /// 0005578 // proteinaceous extracellular matrix // inferred from electronic annotation /// 0005604 // basement membrane // inferred from electronic annotation /// 0031012 // extracellular matrix // inferred from direct assay	0005507 // copper ion binding // inferred from electronic annotation /// 0005509 // calcium ion binding // inferred from electronic annotation /// 0050840 // extracellular matrix binding // inferred from direct assay	---	gb:NM_009242.1 /DB_XREF=gi:6678076 /GEN=Sparc /FEA=FLmRNA /CNT=413 /TID=Mm.35439.1 /TIER=FL+Stack /STK=62 /UG=Mm.35439 /LL=20692 /DEF=Mus musculus secreted acidic cysteine rich glycoprotein (Sparc), mRNA. /PROD=secreted acidic cysteine rich glycoprotein /FL=gb:NM_009242.1 gb:BC004638.1	-0.051931	0.33092	0.64738	-0.10255	-0.17617	-0.029914	-0.41753	-0.33296	-0.20077	-0.80169	-0.64718	-0.71758
1448428_at	Nbl1	neuroblastoma, suppression of tumorigenicity 1	---	0005576 // extracellular region // inferred from electronic annotation	---	---	gb:NM_008675.1 /DB_XREF=gi:6679017 /GEN=Nbl1 /FEA=FLmRNA /CNT=122 /TID=Mm.9404.1 /TIER=FL+Stack /STK=75 /UG=Mm.9404 /LL=17965 /DEF=Mus musculus neuroblastoma, suppression of tumorigenicity 1 (Nbl1), mRNA. /PROD=neuroblastoma, suppression of tumorigenicity 1 /FL=gb:NM_008675.1 gb:D50263.1	0.59728	1.1071	1.2122	0.43402	-0.045479	0.32814	0.056358	0.044903	-0.30703	-0.34351	-0.26034	0.12596
1448460_at	Acvr1	activin A receptor, type 1	0000082 // G1/S transition of mitotic cell cycle // inferred from electronic annotation /// 0001569 // patterning of blood vessels // inferred from mutant phenotype /// 0001655 // urogenital system development // not recorded /// 0001655 // urogenital system development // inferred from electronic annotation /// 0001701 // in utero embryonic development // inferred from mutant phenotype /// 00017…	0005887 // integral to plasma membrane // inferred from direct assay /// 0016020 // membrane // inferred from electronic annotation /// 0016021 // integral to membrane // inferred from electronic annotation /// 0045177 // apical part of cell // inferred from direct assay /// 0048179 // activin receptor complex // inferred from electronic annotation	0000166 // nucleotide binding // inferred from electronic annotation /// 0000287 // magnesium ion binding // inferred from electronic annotation /// 0004672 // protein kinase activity // inferred from electronic annotation /// 0004674 // protein serine/threonine kinase activity // inferred from electronic annotation /// 0004675 // transmembrane receptor protein serine/threonine kinase activity //…	---	gb:NM_007394.1 /DB_XREF=gi:6680627 /GEN=Acvr1 /FEA=FLmRNA /CNT=104 /TID=Mm.689.1 /TIER=FL+Stack /STK=70 /UG=Mm.689 /LL=11477 /DEF=Mus musculus activin A receptor, type 1 (Acvr1), mRNA. /PROD=activin A receptor, type 1 /FL=gb:AF332088.1 gb:AF332087.1 gb:NM_007394.1 gb:L15436.1	0.016904	0.61425	0.74375	-0.12912	-0.37234	-0.1261	-0.41467	-0.028938	-0.09926	-0.7109	-0.38577	-0.55666
1448501_at	Tspan6	tetraspanin 6	0043123 // positive regulation of I-kappaB kinase/NF-kappaB cascade // inferred from electronic annotation	0016020 // membrane // inferred from electronic annotation /// 0016021 // integral to membrane // inferred from electronic annotation	0004871 // signal transducer activity // inferred from electronic annotation	---	gb:NM_019656.1 /DB_XREF=gi:9790264 /GEN=Tm4sf6 /FEA=FLmRNA /CNT=174 /TID=Mm.46701.1 /TIER=FL+Stack /STK=59 /UG=Mm.46701 /LL=56496 /DEF=Mus musculus transmembrane 4 superfamily member 6 (Tm4sf6), mRNA. /PROD=transmembrane 4 superfamily member 6 /FL=gb:BC003733.1 gb:AF053454.1 gb:NM_019656.1	-0.30592	0.25326	0.50201	-0.6202	-0.51248	-0.41137	-0.88671	-0.62691	-0.60612	-1.126	-0.97551	-1.0904
1448592_at	Crtap	cartilage associated protein	0007283 // spermatogenesis // inferred from expression pattern	0005576 // extracellular region // inferred from electronic annotation /// 0005578 // proteinaceous extracellular matrix // inferred from electronic annotation	---	---	gb:NM_019922.1 /DB_XREF=gi:9910169 /GEN=Crtap /FEA=FLmRNA /CNT=102 /TID=Mm.20904.1 /TIER=FL+Stack /STK=56 /UG=Mm.20904 /LL=56693 /DEF=Mus musculus cartilage associated protein (Crtap), mRNA. /PROD=cartilage associated protein /FL=gb:NM_019922.1	-0.10852	0.32151	0.5727	-0.25945	-0.5621	-0.33889	-0.5647	-0.54254	-0.57382	-0.9608	-0.59421	-0.67982
1448593_at	Wisp1	WNT1 inducible signaling pathway protein 1	0001558 // regulation of cell growth // inferred from electronic annotation /// 0007155 // cell adhesion // inferred from electronic annotation /// 0016055 // Wnt receptor signaling pathway // inferred from electronic annotation	0005576 // extracellular region // inferred from electronic annotation	0005515 // protein binding // inferred from electronic annotation /// 0005520 // insulin-like growth factor binding // inferred from electronic annotation	---	gb:AF100777.1 /DB_XREF=gi:4028576 /GEN=Wisp1 /FEA=FLmRNA /CNT=99 /TID=Mm.10222.1 /TIER=FL+Stack /STK=56 /UG=Mm.10222 /LL=22402 /DEF=Mus musculus connective tissue growth factor related protein WISP-1 (Wisp1) mRNA, complete cds. /PROD=connective tissue growth factor related proteinWISP-1 /FL=gb:AF100777.1 gb:NM_018865.1 gb:AB004873.1	-0.1957	0.32293	0.49585	-0.23212	-0.5123	-0.53608	-0.74268	-0.61589	-0.2611	-1.1193	-0.60718	-1.0607
1448594_at	Wisp1	WNT1 inducible signaling pathway protein 1	0001558 // regulation of cell growth // inferred from electronic annotation /// 0007155 // cell adhesion // inferred from electronic annotation /// 0016055 // Wnt receptor signaling pathway // inferred from electronic annotation	0005576 // extracellular region // inferred from electronic annotation	0005515 // protein binding // inferred from electronic annotation /// 0005520 // insulin-like growth factor binding // inferred from electronic annotation	---	gb:NM_018865.1 /DB_XREF=gi:9256532 /GEN=Wisp1 /FEA=FLmRNA /CNT=99 /TID=Mm.10222.1 /TIER=FL+Stack /STK=10 /UG=Mm.10222 /LL=22402 /DEF=Mus musculus WNT1 inducible signaling pathway protein 1 (Wisp1), mRNA. /PROD=WNT1 inducible signaling pathway protein 1 /FL=gb:AF100777.1 gb:NM_018865.1 gb:AB004873.1	-0.20188	0.20958	0.60161	-0.32413	-0.53303	-0.73134	-0.70963	-0.54746	-0.19605	-1.1198	-0.65322	-1.2193
1448601_s_at	Msx1	homeobox, msh-like 1	0000122 // negative regulation of transcription from RNA polymerase II promoter // inferred from direct assay /// 0001701 // in utero embryonic development // inferred from mutant phenotype /// 0003007 // heart morphogenesis // inferred from genetic interaction /// 0006350 // transcription // inferred from electronic annotation /// 0006355 // regulation of transcription, DNA-dependent // inferred…	0005634 // nucleus // inferred from electronic annotation	0003677 // DNA binding // inferred from direct assay /// 0003677 // DNA binding // inferred from electronic annotation /// 0003700 // transcription factor activity // inferred from electronic annotation /// 0005515 // protein binding // inferred from physical interaction /// 0016564 // transcription repressor activity // inferred from direct assay /// 0030528 // transcription regulator activity /…	---	gb:BC016426.1 /DB_XREF=gi:16741154 /FEA=FLmRNA /CNT=112 /TID=Mm.870.1 /TIER=FL+Stack /STK=55 /UG=Mm.870 /LL=17701 /UG_GENE=Msx1 /DEF=Mus musculus, Similar to homeo box, msh-like 1, clone MGC:25404 IMAGE:4923403, mRNA, complete cds. /PROD=Similar to homeo box, msh-like 1 /FL=gb:NM_010835.1 gb:AF308572.1 gb:BC016426.1	-0.18078	0.41543	0.46629	-0.38669	-0.18691	-0.29742	-0.43791	-0.74488	-0.45611	-0.74208	-0.56381	-0.6149
1448613_at	Ecm1	extracellular matrix protein 1	---	0005576 // extracellular region // inferred from electronic annotation /// 0005578 // proteinaceous extracellular matrix // inferred from electronic annotation /// 0005615 // extracellular space // inferred from direct assay	---	---	gb:NM_007899.1 /DB_XREF=gi:6681256 /GEN=Ecm1 /FEA=FLmRNA /CNT=126 /TID=Mm.3433.1 /TIER=FL+Stack /STK=53 /UG=Mm.3433 /LL=13601 /DEF=Mus musculus extracellular matrix protein 1 (Ecm1), mRNA. /PROD=extracellular matrix protein 1 /FL=gb:NM_007899.1 gb:L33416.1	0.1575	0.74613	0.84453	0.10492	-0.32203	0.046588	-0.25095	-0.17556	-0.37082	-0.718	-0.36987	-0.30901
1448648_at	Fam114a1	family with sequence similarity 114, member A1	---	0005737 // cytoplasm // inferred from electronic annotation	---	---	gb:NM_026667.1 /DB_XREF=gi:13386149 /GEN=9130005N14Rik /FEA=FLmRNA /CNT=110 /TID=Mm.87593.1 /TIER=FL /STK=5 /UG=Mm.87593 /LL=68303 /DEF=Mus musculus RIKEN cDNA 9130005N14 gene (9130005N14Rik), mRNA. /PROD=RIKEN cDNA 9130005N14 /FL=gb:NM_026667.1 gb:BC027235.1	-0.13124	0.31856	0.43628	-0.32646	-0.69113	-0.20221	-0.67742	-0.20321	-0.19741	-0.79446	-0.38257	-0.6229
1448655_at	Lrp1	low density lipoprotein receptor-related protein 1	0006897 // endocytosis // inferred from electronic annotation /// 0006898 // receptor-mediated endocytosis // inferred from electronic annotation /// 0007205 // activation of protein kinase C activity by G-protein coupled receptor protein signaling pathway // inferred from electronic annotation /// 0007275 // multicellular organismal development // inferred from electronic annotation /// 0007568 …	0005624 // membrane fraction // inferred from direct assay /// 0005634 // nucleus // inferred from electronic annotation /// 0005737 // cytoplasm // inferred from electronic annotation /// 0005768 // endosome // inferred from electronic annotation /// 0005886 // plasma membrane // inferred from electronic annotation /// 0005905 // coated pit // inferred from electronic annotation /// 0016020 // m…	0002020 // protease binding // inferred from electronic annotation /// 0004872 // receptor activity // inferred from electronic annotation /// 0005509 // calcium ion binding // inferred from electronic annotation /// 0005515 // protein binding // inferred from physical interaction /// 0005515 // protein binding // inferred from electronic annotation /// 0034185 // apolipoprotein binding // inferr…	Statin_Pathway_PharmGKB // GenMAPP /// Wnt_Signaling // GenMAPP	gb:NM_008512.1 /DB_XREF=gi:6678719 /GEN=Lrp1 /FEA=FLmRNA /CNT=182 /TID=Mm.7221.1 /TIER=FL+Stack /STK=49 /UG=Mm.7221 /LL=16971 /DEF=Mus musculus low density lipoprotein receptor-related protein 1 (Lrp1), mRNA. /PROD=low density lipoprotein receptor-related protein1 /FL=gb:AF367720.1 gb:NM_008512.1	0.25247	0.75529	0.62876	0.21747	-0.22627	0.11912	-0.20206	-0.17924	-0.46341	-0.61835	-0.32345	-0.25916
1448696_at	Heph	hephaestin	0006810 // transport // inferred from electronic annotation /// 0006811 // ion transport // inferred from electronic annotation /// 0006825 // copper ion transport // inferred from electronic annotation /// 0006826 // iron ion transport // traceable author statement /// 0006826 // iron ion transport // inferred from electronic annotation /// 0030218 // erythrocyte differentiation // inferred from…	0016020 // membrane // inferred from electronic annotation /// 0016021 // integral to membrane // inferred from electronic annotation	0005506 // iron ion binding // inferred from electronic annotation /// 0005507 // copper ion binding // inferred from electronic annotation /// 0016491 // oxidoreductase activity // inferred from electronic annotation /// 0046872 // metal ion binding // inferred from electronic annotation	---	gb:NM_010417.1 /DB_XREF=gi:6754179 /GEN=Heph /FEA=FLmRNA /CNT=58 /TID=Mm.27494.1 /TIER=FL+Stack /STK=46 /UG=Mm.27494 /LL=15203 /DEF=Mus musculus hephaestin (Heph), mRNA. /PROD=hephaestin /FL=gb:AF082567.1 gb:NM_010417.1	-0.35807	-0.1788	-0.089771	-0.43351	-0.28972	-0.19965	-0.45111	-0.19611	-0.3104	-0.5371	-0.55563	-0.61146
1448792_a_at	Cyp2f2	cytochrome P450, family 2, subfamily f, polypeptide 2	0009636 // response to toxin // inferred from mutant phenotype /// 0018931 // naphthalene metabolic process // inferred from mutant phenotype /// 0055114 // oxidation reduction // inferred from electronic annotation	0005783 // endoplasmic reticulum // inferred from electronic annotation /// 0005792 // microsome // inferred from electronic annotation /// 0016020 // membrane // inferred from electronic annotation /// 0019898 // extrinsic to membrane // inferred from electronic annotation	0004497 // monooxygenase activity // inferred from electronic annotation /// 0005506 // iron ion binding // inferred from electronic annotation /// 0009055 // electron carrier activity // inferred from electronic annotation /// 0016491 // oxidoreductase activity // inferred from electronic annotation /// 0019825 // oxygen binding // inferred from electronic annotation /// 0020037 // heme binding …	---	gb:NM_007817.1 /DB_XREF=gi:6681110 /GEN=Cyp2f2 /FEA=FLmRNA /CNT=168 /TID=Mm.4515.1 /TIER=FL+Stack /STK=39 /UG=Mm.4515 /LL=13107 /DEF=Mus musculus cytochrome P450, 2f2 (Cyp2f2), mRNA. /PROD=cytochrome P450, 2f2 /FL=gb:NM_007817.1 gb:BC011089.1 gb:M77497.1	0.011823	-0.091124	0.67989	0.28637	-0.17837	0.017663	-0.44623	-0.57634	-0.69203	-0.62106	-0.93538	-1.0097
1448933_at	Pcdhb17	protocadherin beta 17	0007155 // cell adhesion // inferred from electronic annotation /// 0007156 // homophilic cell adhesion // inferred from electronic annotation	0016020 // membrane // inferred from electronic annotation /// 0016021 // integral to membrane // inferred from electronic annotation	0005509 // calcium ion binding // inferred from electronic annotation /// 0005515 // protein binding // inferred from electronic annotation	---	gb:NM_053142.1 /DB_XREF=gi:18087794 /GEN=Pcdhb17 /FEA=FLmRNA /CNT=42 /TID=Mm.87553.1 /TIER=FL+Stack /STK=31 /UG=Mm.87553 /LL=93888 /DEF=Mus musculus protocadherin beta 17 (Pcdhb17), mRNA. /PROD=protocadherin beta 17 /FL=gb:AF326310.1 gb:NM_053142.1 gb:BC017149.1 gb:AY013778.1	0.15378	0.73381	0.63728	0.090162	-0.37328	0.1338	-0.35271	0.12056	-0.28185	-0.72512	-0.32026	-0.49958
1449084_s_at	Sh3d19	SH3 domain protein D19	0051044 // positive regulation of membrane protein ectodomain proteolysis // inferred from electronic annotation	0005737 // cytoplasm // inferred from electronic annotation /// 0005794 // Golgi apparatus // inferred from electronic annotation /// 0005886 // plasma membrane // inferred from electronic annotation	0005515 // protein binding // inferred from physical interaction	---	gb:NM_012059.2 /DB_XREF=gi:7657563 /GEN=Sh3d19 /FEA=FLmRNA /CNT=68 /TID=Mm.2454.1 /TIER=FL+Stack /STK=23 /UG=Mm.2454 /LL=27059 /DEF=Mus musculus SH3 domain protein D19 (Sh3d19), mRNA. /PROD=SH3 domain protein D19 /FL=gb:NM_012059.2 gb:D89677.2	0.013565	0.55704	0.60581	-0.20403	-0.42871	-0.10314	-0.50768	-0.097957	-0.28823	-0.79393	-0.52628	-0.5701
1449094_at	Gjc1	gap junction protein, gamma 1	0001570 // vasculogenesis // inferred from mutant phenotype /// 0007154 // cell communication // inferred from electronic annotation /// 0007267 // cell-cell signaling // inferred from mutant phenotype /// 0007268 // synaptic transmission // inferred from mutant phenotype /// 0007507 // heart development // inferred from mutant phenotype /// 0007601 // visual perception // inferred from mutant ph…	0005886 // plasma membrane // inferred from electronic annotation /// 0005921 // gap junction // inferred from direct assay /// 0005921 // gap junction // inferred from electronic annotation /// 0005922 // connexon complex // inferred from electronic annotation /// 0016020 // membrane // inferred from electronic annotation /// 0016021 // integral to membrane // inferred from electronic annotation…	0005515 // protein binding // inferred from physical interaction	Calcium_regulation_in_cardiac_cells // GenMAPP	gb:NM_008122.1 /DB_XREF=gi:6680006 /GEN=Gja7 /FEA=FLmRNA /CNT=41 /TID=Mm.3096.1 /TIER=FL+Stack /STK=23 /UG=Mm.3096 /LL=14615 /DEF=Mus musculus gap junction membrane channel protein alpha 7 (Gja7), mRNA. /PROD=gap junction membrane channel protein alpha 7 /FL=gb:NM_008122.1	0.16048	0.9924	0.84539	-0.14072	-0.27811	0.10339	-0.25458	0.0066825	-0.21029	-0.51241	-0.58955	-0.49533
1449145_a_at	Cav1	caveolin 1, caveolae protein	0000165 // MAPKKK cascade // inferred from mutant phenotype /// 0000188 // inactivation of MAPK activity // inferred from mutant phenotype /// 0001570 // vasculogenesis // inferred from mutant phenotype /// 0001666 // response to hypoxia // inferred from mutant phenotype /// 0001937 // negative regulation of endothelial cell proliferation // inferred from mutant phenotype /// 0001960 // negative …	0000139 // Golgi membrane // inferred from electronic annotation /// 0000139 // Golgi membrane // inferred from sequence or structural similarity /// 0000299 // integral to membrane of membrane fraction // inferred from direct assay /// 0005622 // intracellular // inferred from electronic annotation /// 0005625 // soluble fraction // inferred from electronic annotation /// 0005737 // cytoplasm //…	0005515 // protein binding // inferred from physical interaction /// 0016504 // peptidase activator activity // inferred from mutant phenotype /// 0019900 // kinase binding // inferred from electronic annotation /// 0019905 // syntaxin binding // inferred from electronic annotation /// 0042802 // identical protein binding // inferred from electronic annotation /// 0050998 // nitric-oxide synthase…	Integrin-mediated_cell_adhesion_KEGG // GenMAPP	gb:AB029929.1 /DB_XREF=gi:6705976 /FEA=FLmRNA /CNT=60 /TID=Mm.28278.1 /TIER=FL+Stack /STK=21 /UG=Mm.28278 /LL=12389 /UG_GENE=Cav /DEF=Mus musculus mRNA for caveolin-1 alfa isoform, complete cds. /PROD=caveolin-1 alfa isoform /FL=gb:AB029929.1 gb:NM_007616.1 gb:U07645.1	0.15074	0.44882	0.61686	-0.23412	-0.50442	-0.35792	-0.31008	-0.26296	-0.3963	-0.70979	-0.54935	-0.92834
1449147_at	Chst1	carbohydrate (keratan sulfate Gal-6) sulfotransferase 1	0005975 // carbohydrate metabolic process // inferred from electronic annotation /// 0006012 // galactose metabolic process // inferred from electronic annotation /// 0006954 // inflammatory response // inferred from electronic annotation /// 0042339 // keratan sulfate metabolic process // inferred from electronic annotation	0000139 // Golgi membrane // inferred from electronic annotation /// 0005794 // Golgi apparatus // inferred from electronic annotation /// 0016020 // membrane // inferred from electronic annotation /// 0016021 // integral to membrane // inferred from electronic annotation	0008146 // sulfotransferase activity // inferred from electronic annotation /// 0016740 // transferase activity // inferred from electronic annotation /// 0045130 // keratan sulfotransferase activity // inferred from electronic annotation	---	gb:NM_023850.1 /DB_XREF=gi:12963844 /GEN=Chst1 /FEA=FLmRNA /CNT=40 /TID=Mm.38021.1 /TIER=FL+Stack /STK=21 /UG=Mm.38021 /LL=76969 /DEF=Mus musculus carbohydrate (keratan sulfate Gal-6) sulfotransferase 1 (Chst1), mRNA. /PROD=carbohydrate (keratan sulfate Gal-6)sulfotransferase 1 /FL=gb:AF280087.1 gb:NM_023850.1	-0.22319	-0.35083	0.13879	-0.48281	-0.53718	-0.4579	-0.37209	-0.36392	-0.30789	-0.77939	-0.56161	-0.70102
1449315_at	Odz3	odd Oz/ten-m homolog 3 (Drosophila)	0007165 // signal transduction // inferred from electronic annotation	0005887 // integral to plasma membrane // inferred from sequence or structural similarity /// 0016020 // membrane // inferred from electronic annotation /// 0016021 // integral to membrane // inferred from electronic annotation	---	---	gb:NM_011857.2 /DB_XREF=gi:7657416 /GEN=Odz3 /FEA=FLmRNA /CNT=38 /TID=Mm.42191.1 /TIER=FL+Stack /STK=15 /UG=Mm.42191 /LL=23965 /DEF=Mus musculus odd Ozten-m homolog 3 (Drosophila) (Odz3), mRNA. /PROD=odd Ozten-m homolog 3 (Drosophila) /FL=gb:AB025412.1 gb:NM_011857.2	0.13144	0.85289	0.79482	-0.1333	-0.081601	0.0076243	-0.55454	-0.077493	-0.31728	-0.67932	-0.38783	-0.46945
1449334_at	Timp3	tissue inhibitor of metalloproteinase 3	0007417 // central nervous system development // inferred from electronic annotation /// 0007568 // aging // inferred from electronic annotation /// 0009612 // response to mechanical stimulus // inferred from electronic annotation /// 0009725 // response to hormone stimulus // inferred from electronic annotation /// 0014070 // response to organic cyclic substance // inferred from electronic annot…	0005576 // extracellular region // inferred from electronic annotation /// 0005578 // proteinaceous extracellular matrix // inferred from electronic annotation /// 0005604 // basement membrane // inferred from direct assay /// 0005737 // cytoplasm // inferred from electronic annotation	0004857 // enzyme inhibitor activity // inferred from electronic annotation /// 0005515 // protein binding // inferred from electronic annotation /// 0008191 // metalloendopeptidase inhibitor activity // inferred from electronic annotation	Matrix_Metalloproteinases // GenMAPP	gb:BC014713.1 /DB_XREF=gi:15928469 /FEA=FLmRNA /CNT=399 /TID=Mm.4871.1 /TIER=FL+Stack /STK=13 /UG=Mm.4871 /LL=21859 /UG_GENE=Timp3 /DEF=Mus musculus, Similar to tissue inhibitor of metalloproteinase 3, clone MGC:25359 IMAGE:4239015, mRNA, complete cds. /PROD=Similar to tissue inhibitor of metalloproteinase3 /FL=gb:BC014713.1 gb:L19622.1 gb:L27424.1 gb:NM_011595.1	-0.27049	-0.136	0.37066	-0.67848	-0.78631	-0.5574	-0.42681	-0.033696	-0.52648	-0.4542	-0.21296	-0.32092
1449396_at	Aoc3	amine oxidase, copper containing 3	0007155 // cell adhesion // inferred from electronic annotation /// 0007155 // cell adhesion // inferred from sequence or structural similarity /// 0009308 // amine metabolic process // inferred from electronic annotation /// 0009308 // amine metabolic process // inferred from sequence or structural similarity /// 0055114 // oxidation reduction // inferred from electronic annotation	0005886 // plasma membrane // inferred from electronic annotation /// 0005886 // plasma membrane // inferred from sequence or structural similarity /// 0009986 // cell surface // inferred from electronic annotation /// 0009986 // cell surface // inferred from sequence or structural similarity /// 0016020 // membrane // inferred from electronic annotation /// 0016021 // integral to membrane // inf…	0005507 // copper ion binding // inferred from electronic annotation /// 0005509 // calcium ion binding // inferred from electronic annotation /// 0005515 // protein binding // inferred from electronic annotation /// 0008131 // amine oxidase activity // inferred from electronic annotation /// 0008131 // amine oxidase activity // inferred from sequence or structural similarity /// 0016491 // oxido…	---	gb:NM_009675.1 /DB_XREF=gi:6753065 /GEN=Aoc3 /FEA=FLmRNA /CNT=30 /TID=Mm.10734.1 /TIER=FL+Stack /STK=12 /UG=Mm.10734 /LL=11754 /DEF=Mus musculus amine oxidase, copper containing 3 (Aoc3), mRNA. /PROD=amine oxidase, copper containing 3 /FL=gb:AF115411.1 gb:AF054831.1 gb:NM_009675.1	-0.41561	-0.047523	0.34807	-0.66594	-0.55136	-0.25896	-0.82808	-0.56763	-0.43062	-0.99175	-0.89931	-1.0663
1449466_at	Clec3b	C-type lectin domain family 3, member b	0001501 // skeletal system development // inferred from mutant phenotype	0005576 // extracellular region // inferred from electronic annotation /// 0005578 // proteinaceous extracellular matrix // traceable author statement /// 0005615 // extracellular space // traceable author statement	0005488 // binding // inferred from electronic annotation /// 0005509 // calcium ion binding // traceable author statement /// 0005515 // protein binding // inferred from electronic annotation /// 0005529 // sugar binding // traceable author statement /// 0005529 // sugar binding // inferred from electronic annotation	---	gb:NM_011606.1 /DB_XREF=gi:6755820 /GEN=Tna /FEA=FLmRNA /CNT=18 /TID=Mm.34588.1 /TIER=FL+Stack /STK=10 /UG=Mm.34588 /LL=21922 /DEF=Mus musculus tetranectin (plasminogen binding protein) (Tna), mRNA. /PROD=tetranectin (plasminogen binding protein) /FL=gb:U08595.1 gb:NM_011606.1	0.25815	0.55981	0.95236	-0.26803	-0.76705	-0.05192	-0.4041	-0.38438	-0.44051	-0.96826	-0.73472	-0.68831
1449530_at	Trps1	trichorhinophalangeal syndrome I (human)	0006350 // transcription // inferred from electronic annotation /// 0006355 // regulation of transcription, DNA-dependent // inferred from electronic annotation /// 0045449 // regulation of transcription // inferred from electronic annotation /// 0045892 // negative regulation of transcription, DNA-dependent // inferred from physical interaction	0005622 // intracellular // inferred from electronic annotation /// 0005634 // nucleus // inferred by curator /// 0005634 // nucleus // inferred from electronic annotation	0003677 // DNA binding // inferred from electronic annotation /// 0003700 // transcription factor activity // inferred from electronic annotation /// 0005515 // protein binding // inferred from physical interaction /// 0008270 // zinc ion binding // inferred from electronic annotation /// 0016564 // transcription repressor activity // inferred from physical interaction /// 0043565 // sequence-spe…	---	gb:NM_032000.1 /DB_XREF=gi:14030774 /GEN=Trps1 /FEA=FLmRNA /CNT=33 /TID=Mm.30466.1 /TIER=FL+Stack /STK=8 /UG=Mm.30466 /LL=83925 /DEF=Mus musculus trichorhinophalangeal syndrome I (human) (Trps1), mRNA. /PROD=trichorhinophalangeal syndrome I (human) /FL=gb:AF346836.1 gb:NM_032000.1	-0.24317	0.33664	0.42707	-0.33831	-0.29202	-0.16476	-0.71996	-0.31119	-0.17521	-1.017	-0.67127	-0.64151
1449531_at	Leprel2	leprecan-like 2	0055114 // oxidation reduction // inferred from electronic annotation	0005783 // endoplasmic reticulum // inferred from electronic annotation	0005506 // iron ion binding // inferred from electronic annotation /// 0016491 // oxidoreductase activity // inferred from electronic annotation /// 0016702 // oxidoreductase activity, acting on single donors with incorporation of molecular oxygen, incorporation of two atoms of oxygen // inferred from electronic annotation /// 0016705 // oxidoreductase activity, acting on paired donors, with inco…	---	gb:BC003726.1 /DB_XREF=gi:13277629 /FEA=FLmRNA /CNT=22 /TID=Mm.35708.1 /TIER=FL+Stack /STK=8 /UG=Mm.35708 /LL=14789 /UG_GENE=Grcb /DEF=Mus musculus, gene rich cluster, B gene, clone MGC:5777 IMAGE:3497610, mRNA, complete cds. /PROD=gene rich cluster, B gene /FL=gb:BC016431.1 gb:NM_013534.1 gb:BC003726.1	-0.032442	0.55723	0.65549	-0.21232	-0.4984	-0.02576	-0.4111	-0.19212	-0.31555	-0.89364	-0.49188	-0.57424
1449615_s_at	Hdlbp	high density lipoprotein (HDL) binding protein	0006629 // lipid metabolic process // inferred from electronic annotation /// 0006810 // transport // inferred from electronic annotation /// 0006869 // lipid transport // inferred from electronic annotation /// 0008202 // steroid metabolic process // inferred from electronic annotation /// 0008203 // cholesterol metabolic process // inferred from electronic annotation	0005634 // nucleus // inferred from electronic annotation /// 0005737 // cytoplasm // inferred from electronic annotation /// 0034364 // high-density lipoprotein particle // inferred from electronic annotation	0003723 // RNA binding // inferred from electronic annotation /// 0005515 // protein binding // inferred from electronic annotation	---	gb:C77256 /DB_XREF=gi:2517586 /DB_XREF=C77256 /CLONE=J0028B03 /FEA=EST /CNT=1 /TID=Mm.215181.1 /TIER=ConsEnd /STK=1 /UG=Mm.215181 /LL=52229 /UG_GENE=D1Ertd101e /UG_TITLE=DNA segment, Chr 1, ERATO Doi 101, expressed	-0.22865	0.14826	0.40796	-0.25527	-0.59093	-0.32061	-0.65082	-0.6509	-0.43364	-0.57618	-0.57835	-0.83093
1449827_at	Acan	aggrecan	0001502 // cartilage condensation // inferred from mutant phenotype /// 0002063 // chondrocyte development // inferred from mutant phenotype /// 0007155 // cell adhesion // inferred from electronic annotation /// 0030166 // proteoglycan biosynthetic process // inferred from mutant phenotype /// 0030199 // collagen fibril organization // inferred from mutant phenotype	0005576 // extracellular region // inferred from electronic annotation /// 0005578 // proteinaceous extracellular matrix // inferred from direct assay /// 0005578 // proteinaceous extracellular matrix // inferred from electronic annotation /// 0005604 // basement membrane // inferred from direct assay /// 0031012 // extracellular matrix // inferred from direct assay	0005488 // binding // inferred from electronic annotation /// 0005515 // protein binding // inferred from physical interaction /// 0005529 // sugar binding // inferred from electronic annotation /// 0005540 // hyaluronic acid binding // inferred from electronic annotation	---	gb:NM_007424.1 /DB_XREF=gi:6671522 /GEN=Agc1 /FEA=FLmRNA /CNT=15 /TID=Mm.2759.1 /TIER=FL /STK=6 /UG=Mm.2759 /LL=11595 /DEF=Mus musculus aggrecan 1 (Agc1), mRNA. /PROD=aggrecan 1 /FL=gb:L07049.1 gb:NM_007424.1	-0.42584	-0.24131	0.35796	-0.68285	-0.86946	-0.93192	-1.076	-0.82378	-0.65813	-1.5968	-1.5187	-1.2775
1449863_a_at	Dlx5	distal-less homeobox 5	0006355 // regulation of transcription, DNA-dependent // inferred from mutant phenotype /// 0006355 // regulation of transcription, DNA-dependent // inferred from electronic annotation /// 0007275 // multicellular organismal development // inferred from electronic annotation /// 0007399 // nervous system development // inferred from mutant phenotype /// 0007409 // axonogenesis // inferred from mu…	0005634 // nucleus // inferred from direct assay /// 0005634 // nucleus // inferred from electronic annotation /// 0005737 // cytoplasm // inferred from direct assay	0003677 // DNA binding // inferred from direct assay /// 0003677 // DNA binding // inferred from electronic annotation /// 0003700 // transcription factor activity // inferred from electronic annotation /// 0005515 // protein binding // inferred from physical interaction /// 0030528 // transcription regulator activity // inferred from electronic annotation /// 0043565 // sequence-specific DNA bin…	---	gb:NM_010056.1 /DB_XREF=gi:7106292 /GEN=Dlx5 /FEA=FLmRNA /CNT=10 /TID=Mm.4873.1 /TIER=FL /STK=5 /UG=Mm.4873 /LL=13395 /DEF=Mus musculus distal-less homeobox 5 (Dlx5), mRNA. /PROD=distal-less homeobox 5 /FL=gb:AF022077.1 gb:AF072453.1 gb:NM_010056.1	-0.19087	-0.34899	0.27503	-0.44199	-0.37512	-0.37031	-0.47208	-0.39253	-0.30848	-0.98143	-0.57445	-0.73374
1450065_at	Adcy7	adenylate cyclase 7	0006171 // cAMP biosynthetic process // traceable author statement /// 0006171 // cAMP biosynthetic process // inferred from electronic annotation /// 0007190 // activation of adenylate cyclase activity // traceable author statement /// 0007242 // intracellular signaling cascade // inferred from electronic annotation /// 0009190 // cyclic nucleotide biosynthetic process // inferred from electroni…	0005886 // plasma membrane // traceable author statement /// 0016020 // membrane // inferred from electronic annotation /// 0016021 // integral to membrane // inferred from electronic annotation	0000166 // nucleotide binding // inferred from electronic annotation /// 0000287 // magnesium ion binding // inferred from electronic annotation /// 0004016 // adenylate cyclase activity // traceable author statement /// 0004016 // adenylate cyclase activity // inferred from electronic annotation /// 0005524 // ATP binding // inferred from electronic annotation /// 0016829 // lyase activity // in…	Calcium_regulation_in_cardiac_cells // GenMAPP /// G_Protein_Signaling // GenMAPP /// Smooth_muscle_contraction // GenMAPP	gb:BQ176297 /DB_XREF=gi:20351789 /DB_XREF=UI-M-DJ2-bwg-n-03-0-UI.s1 /CLONE=UI-M-DJ2-bwg-n-03-0-UI /FEA=FLmRNA /CNT=67 /TID=Mm.18658.1 /TIER=Stack /STK=27 /UG=Mm.18658 /LL=11513 /UG_GENE=Adcy7 /UG_TITLE=adenylate cyclase 7 /FL=gb:U12919.1 gb:NM_007406.1	-0.10551	0.32747	0.57772	-0.15904	-0.35941	-0.25763	-0.32771	-0.50887	0.074439	-0.66728	-0.51879	-0.59582
1450079_at	Nrk	Nik related kinase	0006468 // protein amino acid phosphorylation // inferred from electronic annotation /// 0007256 // activation of JNKK activity // inferred from direct assay	---	0000166 // nucleotide binding // inferred from electronic annotation /// 0004672 // protein kinase activity // inferred from direct assay /// 0004672 // protein kinase activity // not recorded /// 0004672 // protein kinase activity // inferred from electronic annotation /// 0004674 // protein serine/threonine kinase activity // inferred from electronic annotation /// 0005083 // small GTPase regul…	---	gb:AK012873.1 /DB_XREF=gi:12849903 /GEN=Nrk /FEA=FLmRNA /CNT=48 /TID=Mm.89850.1 /TIER=Stack /STK=9 /UG=Mm.89850 /LL=27206 /UG_TITLE=Nik related kinase /DEF=Mus musculus 10, 11 days embryo whole body cDNA, RIKEN full-length enriched library, clone:2810037D22:Nik related kinase, full insert sequence. /FL=gb:AB035267.1 gb:AB020741.1 gb:NM_013724.1	-0.60157	-0.13464	-0.050909	-1.0841	-1.1317	-0.87462	-1.255	-0.83742	-0.24346	-1.8045	-1.5127	-1.5762
1450388_s_at	Twsg1	twisted gastrulation homolog 1 (Drosophila)	0001503 // ossification // inferred from mutant phenotype /// 0001707 // mesoderm formation // inferred from genetic interaction /// 0007275 // multicellular organismal development // inferred from electronic annotation /// 0007435 // salivary gland morphogenesis // inferred from mutant phenotype /// 0009790 // embryonic development // inferred from mutant phenotype /// 0009888 // tissue developm…	0005576 // extracellular region // inferred from electronic annotation /// 0005615 // extracellular space // inferred from direct assay	0005515 // protein binding // inferred from physical interaction	---	gb:BB400695 /DB_XREF=gi:16414280 /DB_XREF=BB400695 /CLONE=C330019K20 /FEA=FLmRNA /CNT=161 /TID=Mm.10153.1 /TIER=Stack /STK=11 /UG=Mm.10153 /LL=65960 /UG_GENE=Twg-pending /UG_TITLE=twisted gastrulation protein /FL=gb:BC004850.1 gb:NM_023053.1	-0.034288	0.24909	0.51095	-0.18266	-0.44671	-0.088253	-0.46096	-0.21478	-0.27312	-0.93032	-0.67019	-0.59141
1450429_at	Capn6	calpain 6	0006508 // proteolysis // inferred from electronic annotation	0005622 // intracellular // inferred from electronic annotation	0004197 // cysteine-type endopeptidase activity // inferred from electronic annotation /// 0004198 // calcium-dependent cysteine-type endopeptidase activity // inferred from electronic annotation	Integrin-mediated_cell_adhesion_KEGG // GenMAPP	gb:AI747133 /DB_XREF=gi:5125397 /DB_XREF=ul12a02.x1 /CLONE=IMAGE:2076554 /FEA=FLmRNA /CNT=48 /TID=Mm.30290.1 /TIER=Stack /STK=15 /UG=Mm.30290 /LL=12338 /UG_GENE=Capn6 /UG_TITLE=calpain 6 /FL=gb:NM_007603.1	-0.14478	0.4393	0.39993	-0.41014	-0.57993	-0.44009	-0.58102	-0.59826	-0.35133	-0.63652	-0.48729	-0.59388
1450652_at	Ctsk	cathepsin K	0001957 // intramembranous ossification // inferred from electronic annotation /// 0006508 // proteolysis // inferred from electronic annotation /// 0045453 // bone resorption // inferred from electronic annotation	0005615 // extracellular space // inferred from electronic annotation /// 0005737 // cytoplasm // inferred from electronic annotation /// 0005764 // lysosome // inferred from electronic annotation	0004197 // cysteine-type endopeptidase activity // inferred from electronic annotation /// 0005515 // protein binding // inferred from electronic annotation /// 0008233 // peptidase activity // inferred from electronic annotation /// 0008234 // cysteine-type peptidase activity // inferred from electronic annotation /// 0016787 // hydrolase activity // inferred from electronic annotation	---	gb:NM_007802.1 /DB_XREF=gi:6681084 /GEN=Ctsk /FEA=FLmRNA /CNT=92 /TID=Mm.3109.1 /TIER=FL+Stack /STK=40 /UG=Mm.3109 /LL=13038 /DEF=Mus musculus cathepsin K (Ctsk), mRNA. /PROD=cathepsin K /FL=gb:NM_007802.1	-0.13627	0.41217	0.66372	-0.23272	-0.28202	-0.48678	-0.77892	-0.61254	-0.92081	-0.91957	-0.99241	-0.92832
1450734_at	Sec16b	SEC16 homolog B (S. cerevisiae)	0006810 // transport // inferred from electronic annotation /// 0015031 // protein transport // inferred from electronic annotation /// 0016192 // vesicle-mediated transport // inferred from electronic annotation	0005783 // endoplasmic reticulum // inferred from electronic annotation /// 0005794 // Golgi apparatus // inferred from electronic annotation /// 0016020 // membrane // inferred from electronic annotation /// 0019898 // extrinsic to membrane // inferred from electronic annotation	---	---	gb:NM_033354.1 /DB_XREF=gi:15375333 /GEN=Rgpr-pending /FEA=FLmRNA /CNT=36 /TID=Mm.87114.1 /TIER=FL+Stack /STK=15 /UG=Mm.87114 /LL=89867 /DEF=Mus musculus regucalcin gene promotor region related protein (Rgpr-pending), mRNA. /PROD=regucalcin gene promotor region related protein /FL=gb:NM_033354.1 gb:AB063356.1	-0.039424	0.34823	0.52604	-0.28812	-0.48077	-0.42073	-0.61838	-0.23609	-0.19544	-0.94597	-0.57757	-0.76278
1450757_at	Cdh11	cadherin 11	0007155 // cell adhesion // inferred from electronic annotation /// 0007156 // homophilic cell adhesion // inferred from electronic annotation	0005737 // cytoplasm // inferred from direct assay /// 0005886 // plasma membrane // inferred from direct assay /// 0005886 // plasma membrane // inferred from electronic annotation /// 0016020 // membrane // inferred from electronic annotation /// 0016021 // integral to membrane // inferred from electronic annotation	0005509 // calcium ion binding // inferred from electronic annotation /// 0005515 // protein binding // inferred from electronic annotation	---	gb:NM_009866.1 /DB_XREF=gi:6753371 /GEN=Cdh11 /FEA=FLmRNA /CNT=135 /TID=Mm.4525.1 /TIER=FL+Stack /STK=11 /UG=Mm.4525 /LL=12552 /DEF=Mus musculus cadherin 11 (Cdh11), mRNA. /PROD=cadherin 11 /FL=gb:D31963.1 gb:D21253.1 gb:NM_009866.1	-0.051999	0.42712	0.62635	-0.034209	-0.024637	-0.083279	-0.43528	-0.19457	-0.27689	-0.68065	-0.54393	-0.67471
1450798_at	Tnxb	tenascin XB	0006629 // lipid metabolic process // inferred from mutant phenotype /// 0006631 // fatty acid metabolic process // inferred from mutant phenotype /// 0006641 // triglyceride metabolic process // inferred from mutant phenotype /// 0006644 // phospholipid metabolic process // inferred from mutant phenotype /// 0006810 // transport // inferred from electronic annotation /// 0006811 // ion transport…	0005576 // extracellular region // inferred from direct assay /// 0005578 // proteinaceous extracellular matrix // inferred from direct assay /// 0005583 // fibrillar collagen // inferred from sequence or structural similarity /// 0005615 // extracellular space // inferred from direct assay /// 0005615 // extracellular space // inferred from electronic annotation /// 0005622 // intracellular // i…	0005102 // receptor binding // inferred from electronic annotation /// 0005178 // integrin binding // inferred from sequence or structural similarity /// 0005216 // ion channel activity // inferred from electronic annotation /// 0005244 // voltage-gated ion channel activity // inferred from electronic annotation /// 0005247 // voltage-gated chloride channel activity // inferred from electronic an…	---	gb:NM_031176.1 /DB_XREF=gi:13928671 /GEN=Tnxb /FEA=FLmRNA /CNT=13 /TID=Mm.183266.1 /TIER=FL /STK=2 /UG=Mm.183266 /LL=81877 /DEF=Mus musculus tenascin XB (Tnxb), mRNA. /PROD=tenascin XB /FL=gb:NM_031176.1	0.27166	0.24627	0.8165	0.12131	-0.37238	0.054877	-0.14039	-0.051203	-0.37868	-0.78487	-0.64044	-0.51795
1450839_at	D0H4S114	DNA segment, human D4S114	0017015 // regulation of transforming growth factor beta receptor signaling pathway // inferred from direct assay /// 0031103 // axon regeneration // inferred from electronic annotation /// 0045664 // regulation of neuron differentiation // inferred from electronic annotation	0005634 // nucleus // inferred from electronic annotation /// 0005737 // cytoplasm // inferred from electronic annotation	0005515 // protein binding // inferred from physical interaction	---	gb:D45203.1 /DB_XREF=gi:757508 /FEA=FLmRNA /CNT=377 /TID=Mm.4919.1 /TIER=Stack /STK=198 /UG=Mm.4919 /LL=27528 /UG_GENE=D0H4S114 /UG_TITLE=DNA segment, human D4S114 /DEF=Mouse pentylenetetrazol-related mRNA PTZ-17 (3UTR of E3.1). /FL=gb:NM_053078.1	0.17191	0.43685	1.0439	-0.29082	-0.77154	-0.49746	-0.80877	-0.78753	-0.52072	-1.4872	-1.1828	-1.4698
1450922_a_at	Tgfb2	transforming growth factor, beta 2	0000902 // cell morphogenesis // inferred from sequence or structural similarity /// 0001501 // skeletal system development // inferred from mutant phenotype /// 0001502 // cartilage condensation // inferred from genetic interaction /// 0001568 // blood vessel development // inferred from mutant phenotype /// 0001654 // eye development // inferred from sequence or structural similarity /// 000182…	0005576 // extracellular region // inferred from electronic annotation /// 0005576 // extracellular region // inferred from sequence or structural similarity /// 0005604 // basement membrane // inferred from electronic annotation /// 0005615 // extracellular space // inferred from direct assay /// 0005615 // extracellular space // inferred from electronic annotation /// 0005737 // cytoplasm // in…	0001540 // beta-amyloid binding // inferred from sequence or structural similarity /// 0005102 // receptor binding // inferred from sequence or structural similarity /// 0005160 // transforming growth factor beta receptor binding // inferred from electronic annotation /// 0005160 // transforming growth factor beta receptor binding // inferred from sequence or structural similarity /// 0005515 // …	---	gb:AW049938 /DB_XREF=gi:5910467 /DB_XREF=UI-M-BH1-ant-a-11-0-UI.s1 /CLONE=UI-M-BH1-ant-a-11-0-UI /FEA=FLmRNA /CNT=136 /TID=Mm.18213.1 /TIER=Stack /STK=23 /UG=Mm.18213 /LL=21808 /UG_GENE=Tgfb2 /UG_TITLE=transforming growth factor, beta 2 /FL=gb:BC011170.1 gb:NM_009367.1	0.081618	0.28396	0.77735	-0.23978	-0.54491	-0.28665	-0.329	-0.011595	-0.32501	-0.77163	-0.5443	-0.62587
1450944_at	Cspg4	chondroitin sulfate proteoglycan 4	0000187 // activation of MAPK activity // inferred from mutant phenotype /// 0001525 // angiogenesis // inferred from electronic annotation /// 0007165 // signal transduction // inferred from electronic annotation /// 0007169 // transmembrane receptor protein tyrosine kinase signaling pathway // inferred from mutant phenotype /// 0007275 // multicellular organismal development // inferred from el…	0005886 // plasma membrane // inferred from direct assay /// 0005886 // plasma membrane // inferred from electronic annotation /// 0016020 // membrane // inferred from electronic annotation /// 0016021 // integral to membrane // inferred from electronic annotation /// 0042995 // cell projection // inferred from electronic annotation	0004871 // signal transducer activity // inferred from electronic annotation /// 0005518 // collagen binding // inferred from electronic annotation	---	gb:BB377873 /DB_XREF=gi:16407667 /DB_XREF=BB377873 /CLONE=C130091C15 /FEA=FLmRNA /CNT=59 /TID=Mm.41329.1 /TIER=Stack /STK=8 /UG=Mm.41329 /LL=121021 /UG_GENE=Cspg4 /UG_TITLE=chondroitin sulfate proteoglycan 4 /FL=gb:NM_139001.1 gb:AF352400.1	-0.23133	0.003542	0.4573	-0.36093	-0.31979	-0.38061	-0.64092	-0.50921	-0.48552	-0.94873	-0.82984	-0.71037
1450958_at	Tm4sf1	transmembrane 4 superfamily member 1	---	0016020 // membrane // inferred from electronic annotation /// 0016021 // integral to membrane // inferred from electronic annotation	---	---	gb:BQ177170 /DB_XREF=gi:20352662 /DB_XREF=UI-M-DJ2-bwa-h-02-0-UI.s1 /CLONE=UI-M-DJ2-bwa-h-02-0-UI /FEA=FLmRNA /CNT=157 /TID=Mm.856.1 /TIER=Stack /STK=10 /UG=Mm.856 /LL=17112 /UG_GENE=Tm4sf1 /UG_TITLE=transmembrane 4 superfamily member 1 /FL=gb:L15443.1 gb:L15429.1 gb:NM_008536.1	0.37046	1.2442	0.93172	0.094455	-0.24332	0.06354	-0.26115	-0.17533	-0.48706	-0.52472	-0.39862	-0.5649
1451332_at	Zfp521	zinc finger protein 521	0006350 // transcription // inferred from electronic annotation /// 0007275 // multicellular organismal development // inferred from electronic annotation /// 0030154 // cell differentiation // inferred from electronic annotation /// 0045449 // regulation of transcription // inferred from electronic annotation	0005622 // intracellular // inferred from electronic annotation /// 0005634 // nucleus // not recorded /// 0005634 // nucleus // inferred from electronic annotation	0003676 // nucleic acid binding // inferred from electronic annotation /// 0003677 // DNA binding // inferred from electronic annotation /// 0008270 // zinc ion binding // inferred from electronic annotation /// 0019904 // protein domain specific binding // inferred from electronic annotation /// 0046872 // metal ion binding // inferred from electronic annotation	---	gb:BC021376.1 /DB_XREF=gi:18204059 /FEA=FLmRNA /CNT=50 /TID=Mm.40325.1 /TIER=FL+Stack /STK=36 /UG=Mm.40325 /DEF=Mus musculus, clone MGC:29358 IMAGE:5038671, mRNA, complete cds. /PROD=Unknown (protein for MGC:29358) /FL=gb:BC021376.1	0.20571	0.91228	0.82495	0.050998	-0.18541	0.24064	-0.33623	0.042991	-0.25516	-0.72576	-0.51508	-0.49017
1451406_a_at	Pcsk5	proprotein convertase subtilisin/kexin type 5	0001822 // kidney development // inferred from mutant phenotype /// 0006508 // proteolysis // inferred from electronic annotation /// 0007507 // heart development // inferred from mutant phenotype /// 0007566 // embryo implantation // inferred from mutant phenotype /// 0009952 // anterior/posterior pattern formation // inferred from mutant phenotype /// 0016486 // peptide hormone processing // in…	0005576 // extracellular region // inferred from electronic annotation /// 0005615 // extracellular space // inferred from direct assay /// 0005794 // Golgi apparatus // inferred from direct assay /// 0016020 // membrane // inferred from electronic annotation /// 0016021 // integral to membrane // inferred from electronic annotation /// 0030141 // secretory granule // inferred from direct assay	0004175 // endopeptidase activity // inferred from direct assay /// 0004252 // serine-type endopeptidase activity // inferred from electronic annotation /// 0004252 // serine-type endopeptidase activity // inferred from direct assay /// 0008233 // peptidase activity // inferred from electronic annotation /// 0008236 // serine-type peptidase activity // inferred from electronic annotation /// 0016…	---	gb:BC013068.1 /DB_XREF=gi:15341798 /FEA=FLmRNA /CNT=39 /TID=Mm.3401.1 /TIER=FL+Stack /STK=23 /UG=Mm.3401 /LL=18552 /UG_GENE=Pcsk5 /DEF=Mus musculus, clone MGC:18501 IMAGE:4036159, mRNA, complete cds. /PROD=Unknown (protein for MGC:18501) /FL=gb:L14932.1 gb:BC013068.1	0.1225	0.64026	0.56147	-0.29451	-0.44504	-0.12271	-0.455	-0.36653	-0.20857	-0.58003	-0.14206	-0.60488
1451415_at	1810011O10Rik	RIKEN cDNA 1810011O10 gene	0006915 // apoptosis // inferred from electronic annotation	---	---	---	gb:BC016562.1 /DB_XREF=gi:16741494 /FEA=FLmRNA /CNT=68 /TID=Mm.25775.1 /TIER=FL+Stack /STK=22 /UG=Mm.25775 /LL=69068 /UG_GENE=1810011O10Rik /DEF=Mus musculus, RIKEN cDNA 1810011O10 gene, clone MGC:29008 IMAGE:3154083, mRNA, complete cds. /PROD=RIKEN cDNA 1810011O10 gene /FL=gb:BC016562.1	-0.32519	0.055704	0.39945	-0.51884	-0.64184	-0.46169	-0.57317	-0.6262	-0.32289	-0.81091	-0.7796	-1.0513
1451427_a_at	Egfl7	EGF-like domain 7	0001525 // angiogenesis // inferred from electronic annotation /// 0001568 // blood vessel development // inferred from expression pattern /// 0001570 // vasculogenesis // inferred from expression pattern /// 0007275 // multicellular organismal development // inferred from electronic annotation /// 0030154 // cell differentiation // inferred from electronic annotation /// 0030334 // regulation of…	0005576 // extracellular region // inferred from direct assay /// 0005576 // extracellular region // inferred from electronic annotation /// 0005615 // extracellular space // inferred from direct assay	0005509 // calcium ion binding // non-traceable author statement /// 0005509 // calcium ion binding // inferred from electronic annotation	---	gb:BC024610.1 /DB_XREF=gi:19354311 /FEA=FLmRNA /CNT=39 /TID=Mm.46628.2 /TIER=FL+Stack /STK=21 /UG=Mm.46628 /LL=22344 /UG_GENE=Vezf1 /DEF=Mus musculus, vascular endothelial zinc finger 1, clone MGC:28455 IMAGE:4159675, mRNA, complete cds. /PROD=vascular endothelial zinc finger 1 /FL=gb:BC024610.1	0.092663	0.2732	0.23078	0.041999	-0.33914	-0.10246	-0.46452	-0.48735	-0.36727	-0.71153	-0.53527	-0.66461
1451501_a_at	Ghr	growth hormone receptor	0000187 // activation of MAPK activity // inferred from electronic annotation /// 0000255 // allantoin metabolic process // inferred from mutant phenotype /// 0006101 // citrate metabolic process // inferred from mutant phenotype /// 0006103 // 2-oxoglutarate metabolic process // inferred from mutant phenotype /// 0006105 // succinate metabolic process // inferred from mutant phenotype /// 000610…	0005576 // extracellular region // inferred from electronic annotation /// 0005615 // extracellular space // inferred from electronic annotation /// 0005634 // nucleus // inferred from direct assay /// 0005634 // nucleus // inferred from electronic annotation /// 0005737 // cytoplasm // inferred from electronic annotation /// 0005739 // mitochondrion // inferred from electronic annotation /// 000…	0004872 // receptor activity // inferred from electronic annotation /// 0004896 // cytokine receptor activity // inferred from electronic annotation /// 0004903 // growth hormone receptor activity // inferred from direct assay /// 0004903 // growth hormone receptor activity // inferred from electronic annotation /// 0005515 // protein binding // inferred from physical interaction /// 0017046 // p…	---	gb:BC024375.1 /DB_XREF=gi:19354411 /FEA=FLmRNA /CNT=22 /TID=Mm.3986.2 /TIER=FL+Stack /STK=14 /UG=Mm.3986 /LL=14600 /UG_GENE=Ghr /DEF=Mus musculus, growth hormone receptor, clone MGC:36022 IMAGE:4976030, mRNA, complete cds. /PROD=growth hormone receptor /FL=gb:BC024375.1	-0.48246	-0.28158	0.22766	-0.70777	-0.50739	-0.348	-0.66415	-0.57258	-0.37663	-0.96742	-0.83378	-1.1706
1451538_at	Sox9	SRY-box containing gene 9	0001502 // cartilage condensation // inferred from mutant phenotype /// 0001708 // cell fate specification // inferred from mutant phenotype /// 0001837 // epithelial to mesenchymal transition // inferred from mutant phenotype /// 0001942 // hair follicle development // inferred from mutant phenotype /// 0006350 // transcription // inferred from electronic annotation /// 0006355 // regulation of …	0005634 // nucleus // inferred from direct assay /// 0005634 // nucleus // inferred from electronic annotation	0003677 // DNA binding // inferred from direct assay /// 0003677 // DNA binding // inferred from electronic annotation /// 0003700 // transcription factor activity // inferred from direct assay /// 0005515 // protein binding // inferred from physical interaction /// 0016563 // transcription activator activity // inferred from direct assay /// 0043565 // sequence-specific DNA binding // inferred f…	---	gb:BC024958.1 /DB_XREF=gi:19353855 /FEA=FLmRNA /CNT=138 /TID=Mm.46607.1 /TIER=FL+Stack /STK=10 /UG=Mm.46607 /DEF=Mus musculus, clone MGC:37029 IMAGE:4949782, mRNA, complete cds. /PROD=Unknown (protein for MGC:37029) /FL=gb:BC024958.1 gb:AF421878.1	-0.17835	0.094139	0.49821	-0.25379	-0.43969	-0.46039	-0.45742	-0.18982	-0.23361	-0.83226	-0.78499	-0.59277
1451577_at	Zbtb20	zinc finger and BTB domain containing 20	0006350 // transcription // inferred from electronic annotation /// 0045449 // regulation of transcription // inferred from electronic annotation	0005622 // intracellular // inferred from electronic annotation /// 0005634 // nucleus // inferred from direct assay /// 0005634 // nucleus // inferred from electronic annotation	0003676 // nucleic acid binding // inferred from electronic annotation /// 0003677 // DNA binding // inferred from direct assay /// 0003677 // DNA binding // inferred from electronic annotation /// 0005515 // protein binding // inferred from electronic annotation /// 0008270 // zinc ion binding // inferred from electronic annotation /// 0046872 // metal ion binding // inferred from electronic ann…	---	gb:AW491109 /DB_XREF=gi:7061390 /DB_XREF=UI-M-BH3-atw-g-06-0-UI.s1 /CLONE=UI-M-BH3-atw-g-06-0-UI /FEA=FLmRNA /CNT=26 /TID=Mm.38250.2 /TIER=ConsEnd /STK=4 /UG=Mm.38250 /LL=56490 /UG_GENE=Zfp288 /UG_TITLE=zinc finger protein 288 /FL=gb:AF194030.1	-0.075834	0.20409	0.66687	-0.23396	-0.30209	-0.099146	-0.387	-0.10296	-0.37288	-0.69289	-0.59357	-0.60614
1451804_a_at	Lrrc16a	leucine rich repeat containing 16A	---	0005737 // cytoplasm // inferred from electronic annotation	---	---	gb:BC012229.1 /DB_XREF=gi:15636663 /FEA=FLmRNA /CNT=19 /TID=Mm.29364.1 /TIER=FL /STK=1 /UG=Mm.29364 /LL=68732 /UG_GENE=1110037D04Rik /DEF=Mus musculus, clone MGC:19001 IMAGE:4014128, mRNA, complete cds. /PROD=Unknown (protein for MGC:19001) /FL=gb:BC012229.1	-0.23096	0.20811	0.43114	-0.32286	-0.39224	-0.13658	-0.50149	-0.13596	-0.35174	-0.6558	-0.61838	-0.62099
1451939_a_at	Rpgr /// Srpx	retinitis pigmentosa GTPase regulator /// sushi-repeat-containing protein	0007601 // visual perception // inferred from mutant phenotype /// 0007601 // visual perception // inferred from electronic annotation /// 0007601 // visual perception // inferred from sequence or structural similarity /// 0042462 // eye photoreceptor cell development // inferred from mutant phenotype /// 0050896 // response to stimulus // inferred from electronic annotation	0005737 // cytoplasm // inferred from direct assay /// 0005794 // Golgi apparatus // inferred from direct assay /// 0005794 // Golgi apparatus // inferred from electronic annotation /// 0005929 // cilium // inferred from direct assay	0005085 // guanyl-nucleotide exchange factor activity // inferred from electronic annotation /// 0005515 // protein binding // inferred from physical interaction	---	gb:AB028050.1 /DB_XREF=gi:6475036 /GEN=drs-2 /FEA=FLmRNA /CNT=1 /TID=Mm.1927.2 /TIER=FL /STK=1 /UG=Mm.1927 /LL=51795 /DEF=Mus musculus drs-2 mRNA for sushi-repeat-containing protein, complete cds. /PROD=sushi-repeat-containing protein /FL=gb:AB028050.1	-0.16872	0.25461	0.4917	-0.39698	-0.69475	-0.314	-0.68408	-0.60658	-0.41209	-1.0528	-0.77494	-0.85578
1452183_a_at	Meg3	maternally expressed 3	---	---	---	---	gb:Y13832.1 /DB_XREF=gi:2739299 /FEA=mRNA /CNT=128 /TID=Mm.154560.1 /TIER=Stack /STK=74 /UG=Mm.154560 /LL=17263 /UG_GENE=Meg3 /UG_TITLE=maternally expressed gene 3 /DEF=Mus musculus mRNA for GT12 protein.	0.53075	1.3138	1.0914	-0.026624	-0.37607	-0.055793	-0.3681	-0.2499	-0.56105	-0.64255	-0.58183	-0.53928
1452284_at	Ptprz1	protein tyrosine phosphatase, receptor type Z, polypeptide 1	0006470 // protein amino acid dephosphorylation // inferred from electronic annotation /// 0007409 // axonogenesis // inferred from direct assay /// 0016311 // dephosphorylation // inferred from electronic annotation	0005578 // proteinaceous extracellular matrix // inferred from direct assay	0004725 // protein tyrosine phosphatase activity // inferred from electronic annotation /// 0004872 // receptor activity // inferred from electronic annotation /// 0005515 // protein binding // inferred from physical interaction /// 0005515 // protein binding // inferred from electronic annotation /// 0016787 // hydrolase activity // inferred from electronic annotation /// 0016791 // phosphatase …	---	gb:BC002298.1 /DB_XREF=gi:12805634 /FEA=mRNA /CNT=48 /TID=Mm.41639.1 /TIER=Stack /STK=25 /UG=Mm.41639 /DEF=Mus musculus, clone IMAGE:3590815, mRNA, partial cds. /PROD=Unknown (protein for IMAGE:3590815)	-0.3136	-0.19125	0.21388	-0.18918	-0.11238	-0.28126	-0.36656	-0.24283	-0.42677	-0.78476	-0.64046	-0.72971
1452330_a_at	Mxra8	matrix-remodelling associated 8	---	0016020 // membrane // inferred from electronic annotation /// 0016021 // integral to membrane // inferred from electronic annotation	---	---	gb:BB765827 /DB_XREF=gi:16196779 /DB_XREF=BB765827 /CLONE=G370056N06 /FEA=mRNA /CNT=20 /TID=Mm.28978.2 /TIER=Stack /STK=13 /UG=Mm.28978 /LL=74761 /UG_GENE=1200013A08Rik /UG_TITLE=RIKEN cDNA 1200013A08 gene	0.21593	0.80939	0.85509	0.20734	-0.21318	0.12587	-0.30972	-0.28501	-0.40439	-0.82096	-0.54966	-0.41574
1452381_at	Creb3l2	cAMP responsive element binding protein 3-like 2	0006350 // transcription // inferred from electronic annotation /// 0006355 // regulation of transcription, DNA-dependent // inferred from electronic annotation /// 0006986 // response to unfolded protein // inferred from electronic annotation /// 0045449 // regulation of transcription // inferred from electronic annotation	0005634 // nucleus // inferred from electronic annotation /// 0005783 // endoplasmic reticulum // inferred from electronic annotation /// 0016020 // membrane // inferred from electronic annotation /// 0016021 // integral to membrane // inferred from electronic annotation	0003677 // DNA binding // inferred from electronic annotation /// 0003700 // transcription factor activity // inferred from electronic annotation /// 0043565 // sequence-specific DNA binding // inferred from electronic annotation /// 0046983 // protein dimerization activity // inferred from electronic annotation	---	gb:AV021105 /DB_XREF=gi:16356372 /DB_XREF=AV021105 /CLONE=1190021J06 /FEA=mRNA /CNT=78 /TID=Mm.169929.1 /TIER=Stack /STK=12 /UG=Mm.169929 /UG_TITLE=Mus musculus, clone IMAGE:3586282, mRNA, partial cds	-0.082222	0.33394	0.53638	-0.31434	-0.58721	-0.23338	-0.44111	-0.26293	-0.28401	-0.53581	-0.34398	-0.36881
1452385_at	Usp53	ubiquitin specific peptidase 53	0006511 // ubiquitin-dependent protein catabolic process // inferred from electronic annotation	---	0004221 // ubiquitin thiolesterase activity // inferred from electronic annotation /// 0004221 // ubiquitin thiolesterase activity // inferred from sequence or structural similarity	---	gb:BG076275 /DB_XREF=gi:12558844 /DB_XREF=H3157G05-3 /CLONE=H3157G05 /FEA=mRNA /CNT=69 /TID=Mm.5026.1 /TIER=Stack /STK=11 /UG=Mm.5026 /LL=99526 /UG_GENE=AA939927 /UG_TITLE=expressed sequence AA939927	-0.26816	-0.016207	0.33475	-0.32834	-0.4598	-0.45415	-0.45613	-0.037924	-0.2235	-0.8351	-0.73817	-0.70187
1452412_at	Hoxc8	homeo box C8	0000122 // negative regulation of transcription from RNA polymerase II promoter // inferred from direct assay /// 0006350 // transcription // inferred from electronic annotation /// 0006355 // regulation of transcription, DNA-dependent // inferred from electronic annotation /// 0007275 // multicellular organismal development // inferred from electronic annotation /// 0009952 // anterior/posterior…	0005634 // nucleus // inferred from direct assay /// 0005634 // nucleus // inferred from electronic annotation	0003677 // DNA binding // inferred from direct assay /// 0003677 // DNA binding // inferred from electronic annotation /// 0003700 // transcription factor activity // inferred from electronic annotation /// 0005515 // protein binding // inferred from electronic annotation /// 0005515 // protein binding // inferred from physical interaction /// 0016564 // transcription repressor activity // inferr…	---	gb:BB283726 /DB_XREF=gi:8984175 /DB_XREF=BB283726 /CLONE=A930103C21 /FEA=mRNA /CNT=26 /TID=Mm.6167.1 /TIER=ConsEnd /STK=3 /UG=Mm.6167 /LL=15426 /UG_GENE=Hoxc8 /UG_TITLE=homeo box C8	-0.14219	0.14925	0.60014	-0.43155	-0.40057	-0.2671	-0.52398	0.1239	-0.1501	-0.68958	-0.61461	-0.66616
1452417_x_at	2010205A11Rik /// Gm10883 /// Gm1420 /// Gm7202 /// Igk /// Igk-C /// Igk-V28 /// LOC100047628	RIKEN cDNA 2010205A11 gene /// predicted gene 10883 /// predicted gene 1420 /// predicted gene 7202 /// immunoglobulin kappa chain complex /// immunoglobulin kappa chain, constant region /// immunoglobulin kappa chain variable 28 (V28) /// similar to Chai	---	---	0003823 // antigen binding // inferred from electronic annotation /// 0004872 // receptor activity // inferred from electronic annotation	---	gb:AV057155 /DB_XREF=gi:5156902 /DB_XREF=AV057155 /CLONE=1810044K02 /FEA=mRNA /CNT=13 /TID=Mm.104747.14 /TIER=ConsEnd /STK=2 /UG=Mm.104747 /LL=16114 /UG_GENE=Igk-V28 /UG_TITLE=immunoglobulin kappa chain variable 28 (V28)	0.32911	0.41708	0.011961	0.6783	0.54454	0.57151	0.57703	0.71058	1.1164	0.83836	0.78107	0.92573
1452557_a_at	---	---	---	---	---	---	gb:BF159226 /DB_XREF=gi:11039324 /DB_XREF=601766681F1 /CLONE=IMAGE:3982389 /FEA=mRNA /CNT=2 /TID=Mm.104747.22 /TIER=ConsEnd /STK=0 /UG=Mm.104747 /LL=16114 /UG_GENE=Igk-V28 /UG_TITLE=immunoglobulin kappa chain variable 28 (V28)	0.15816	-0.0020363	-0.064505	0.52446	0.28154	0.29991	0.40312	0.63842	0.85647	1.2529	0.69715	0.85633
1452752_at	Lepre1	leprecan 1	0016049 // cell growth // inferred from direct assay /// 0055114 // oxidation reduction // inferred from electronic annotation	0005576 // extracellular region // inferred from electronic annotation /// 0005578 // proteinaceous extracellular matrix // inferred from electronic annotation /// 0005634 // nucleus // inferred from direct assay /// 0005737 // cytoplasm // inferred from direct assay /// 0005783 // endoplasmic reticulum // inferred from electronic annotation /// 0005886 // plasma membrane // traceable author stat…	0005488 // binding // inferred from electronic annotation /// 0005506 // iron ion binding // inferred from electronic annotation /// 0016491 // oxidoreductase activity // inferred from electronic annotation /// 0016702 // oxidoreductase activity, acting on single donors with incorporation of molecular oxygen, incorporation of two atoms of oxygen // inferred from electronic annotation /// 0016705 …	---	gb:BE283629 /DB_XREF=gi:9160008 /DB_XREF=601102881F1 /CLONE=IMAGE:3495069 /FEA=mRNA /CNT=160 /TID=Mm.27961.3 /TIER=ConsEnd /STK=0 /UG=Mm.27961 /LL=56401 /UG_GENE=Lepre1 /UG_TITLE=leprecan 1	0.022602	0.11792	0.30649	-0.37496	-0.64498	-0.28072	-0.49726	-0.32892	-0.26079	-0.6527	-0.38909	-0.67576
1452770_at	Vkorc1	vitamin K epoxide reductase complex, subunit 1	0010243 // response to organic nitrogen // inferred from electronic annotation /// 0014070 // response to organic cyclic substance // inferred from electronic annotation /// 0030193 // regulation of blood coagulation // inferred from electronic annotation /// 0042371 // vitamin K biosynthetic process // not recorded /// 0042373 // vitamin K metabolic process // inferred from direct assay /// 0046…	0005783 // endoplasmic reticulum // not recorded /// 0005783 // endoplasmic reticulum // inferred from electronic annotation /// 0005792 // microsome // inferred from electronic annotation /// 0016020 // membrane // inferred from electronic annotation /// 0016021 // integral to membrane // inferred from electronic annotation	0016491 // oxidoreductase activity // inferred from electronic annotation /// 0047057 // vitamin-K-epoxide reductase (warfarin-sensitive) activity // inferred from direct assay /// 0047057 // vitamin-K-epoxide reductase (warfarin-sensitive) activity // not recorded /// 0047057 // vitamin-K-epoxide reductase (warfarin-sensitive) activity // inferred from electronic annotation /// 0047058 // vitami…	---	gb:AK003237.1 /DB_XREF=gi:12833779 /GEN=D7Wsu86e /FEA=mRNA /CNT=95 /TID=Mm.29703.1 /TIER=Stack /STK=45 /UG=Mm.29703 /LL=27973 /UG_TITLE=DNA segment, Chr 7, Wayne State University 86, expressed /DEF=Mus musculus 18 days embryo whole body cDNA, RIKEN full-length enriched library, clone:1110001K05:DNA segment, Chr 7, Wayne State University 86, expressed, full insert sequence.	-0.11784	0.16494	0.56332	-0.20764	-0.65231	-0.46638	-0.58309	-0.49029	-0.36419	-0.83783	-0.39967	-0.66037
1452783_at	Fndc3b	fibronectin type III domain containing 3B	0045600 // positive regulation of fat cell differentiation // inferred from physical interaction	0005783 // endoplasmic reticulum // inferred from electronic annotation /// 0016020 // membrane // inferred from electronic annotation /// 0016021 // integral to membrane // inferred from electronic annotation	---	---	gb:AK005500.1 /DB_XREF=gi:12838100 /FEA=mRNA /CNT=91 /TID=Mm.38832.1 /TIER=Stack /STK=41 /UG=Mm.38832 /LL=72007 /UG_GENE=1600019O04Rik /UG_TITLE=RIKEN cDNA 1600019O04 gene /DEF=Mus musculus adult female placenta cDNA, RIKEN full-length enriched library, clone:1600019O04:unclassifiable transcript, full insert sequence.	-0.081202	0.57682	0.71839	-0.19284	-0.26893	-0.11092	-0.62632	-0.28815	-0.27211	-0.64876	-0.56937	-0.50549
1452946_a_at	Rftn2	raftlin family member 2	---	0005886 // plasma membrane // inferred from electronic annotation /// 0016020 // membrane // inferred from electronic annotation /// 0031225 // anchored to membrane // inferred from electronic annotation	---	---	gb:BE225664 /DB_XREF=gi:8930900 /DB_XREF=ia15a11.x1 /CLONE=IMAGE:5638364 /FEA=mRNA /CNT=58 /TID=Mm.40776.2 /TIER=Stack /STK=17 /UG=Mm.40776 /LL=74013 /UG_GENE=3222401M22Rik /UG_TITLE=RIKEN cDNA 3222401M22 gene	-0.20436	0.02824	0.35428	-0.37722	-0.30522	-0.20014	-0.42892	-0.41367	-0.43714	-0.77047	-0.60528	-0.58759
1453070_at	Pcdh17	protocadherin 17	0007155 // cell adhesion // inferred from electronic annotation /// 0007156 // homophilic cell adhesion // inferred from electronic annotation	0005886 // plasma membrane // inferred from electronic annotation /// 0016020 // membrane // inferred from electronic annotation /// 0016021 // integral to membrane // inferred from electronic annotation	0005509 // calcium ion binding // inferred from electronic annotation /// 0005515 // protein binding // inferred from electronic annotation	---	gb:BB305930 /DB_XREF=gi:16402182 /DB_XREF=BB305930 /CLONE=B230206C19 /FEA=mRNA /CNT=35 /TID=Mm.40854.1 /TIER=Stack /STK=8 /UG=Mm.40854 /LL=77386 /UG_GENE=C030033F14Rik /UG_TITLE=RIKEN cDNA C030033F14 gene	-0.040335	0.42074	0.75468	-0.28308	-0.4328	-0.070876	-0.48336	-0.040554	-0.38682	-0.92762	-0.52998	-0.81317
1453089_at	3110079O15Rik	RIKEN cDNA 3110079O15 gene	---	0016020 // membrane // inferred from electronic annotation /// 0016021 // integral to membrane // inferred from electronic annotation	---	---	gb:AA259365 /DB_XREF=gi:1895644 /DB_XREF=va50e01.r1 /CLONE=IMAGE:734808 /FEA=mRNA /CNT=9 /TID=Mm.7310.1 /TIER=Stack /STK=8 /UG=Mm.7310 /LL=73234 /UG_GENE=3110079O15Rik /UG_TITLE=RIKEN cDNA 3110079O15 gene	-0.29442	-0.33793	0.025333	-0.42269	-0.53684	-0.52772	-0.60388	-0.5866	-0.65768	-1.0081	-1.1655	-0.8568
1453191_at	Col27a1	collagen, type XXVII, alpha 1	0007155 // cell adhesion // inferred from electronic annotation	0005576 // extracellular region // inferred from electronic annotation /// 0005578 // proteinaceous extracellular matrix // inferred from electronic annotation /// 0005581 // collagen // inferred from electronic annotation /// 0005583 // fibrillar collagen // inferred from direct assay	0005198 // structural molecule activity // inferred from electronic annotation /// 0005201 // extracellular matrix structural constituent // inferred from electronic annotation	---	gb:BB044654 /DB_XREF=gi:15403932 /DB_XREF=BB044654 /CLONE=6030489L02 /FEA=mRNA /CNT=44 /TID=Mm.31400.1 /TIER=Stack /STK=9 /UG=Mm.31400 /LL=66652 /UG_GENE=5730512J02Rik /UG_TITLE=RIKEN cDNA 5730512J02 gene	-0.36002	-0.074785	0.53242	-0.5593	-0.73704	-0.51876	-0.88126	-0.67385	-0.54342	-1.3431	-1.3346	-1.1144
1453418_at	Col24a1	collagen, type XXIV, alpha 1	0007155 // cell adhesion // inferred from electronic annotation	0005576 // extracellular region // inferred from electronic annotation /// 0005578 // proteinaceous extracellular matrix // inferred from electronic annotation /// 0005581 // collagen // inferred from electronic annotation	0005198 // structural molecule activity // inferred from electronic annotation /// 0005201 // extracellular matrix structural constituent // inferred from electronic annotation	---	gb:AK017266.1 /DB_XREF=gi:12856416 /FEA=mRNA /CNT=10 /TID=Mm.62619.1 /TIER=ConsEnd /STK=3 /UG=Mm.62619 /LL=71355 /UG_GENE=5430404K19Rik /UG_TITLE=RIKEN cDNA 5430404K19 gene /DEF=Mus musculus 6 days neonate head cDNA, RIKEN full-length enriched library, clone:5430404K19:homolog to CDNA FLJ11895 FIS, CLONE HEMBA1007301, WEAKLY SIMILAR TO COLLAGEN ALPHA 1(III) CHAIN, full insert sequence.	-0.25693	-0.035547	0.32142	-0.43115	-0.54949	-0.52848	-0.94938	-0.61839	-0.32726	-1.35	-0.78602	-1.1838
1453724_a_at	Serpinf1	serine (or cysteine) peptidase inhibitor, clade F, member 1	0016525 // negative regulation of angiogenesis // inferred from direct assay /// 0016525 // negative regulation of angiogenesis // inferred from electronic annotation /// 0050728 // negative regulation of inflammatory response // inferred from electronic annotation /// 0050769 // positive regulation of neurogenesis // inferred from electronic annotation /// 0050769 // positive regulation of neuro…	0005576 // extracellular region // inferred from direct assay /// 0005576 // extracellular region // inferred from electronic annotation /// 0005615 // extracellular space // inferred from direct assay /// 0042470 // melanosome // inferred from electronic annotation	0004867 // serine-type endopeptidase inhibitor activity // inferred from electronic annotation	---	gb:AK012411.1 /DB_XREF=gi:12849137 /GEN=Serpinf1 /FEA=mRNA /CNT=30 /TID=Mm.2044.2 /TIER=ConsEnd /STK=0 /UG=Mm.2044 /LL=20317 /UG_TITLE=serine (or cysteine) proteinase inhibitor, clade F (alpha-2 antiplasmin, pigment epithelium derived factor), member 1 /DEF=Mus musculus 11 days embryo whole body cDNA, RIKEN full-length enriched library, clone:2700051P09:serine (or cysteine) proteinase inhibitor, …	-0.030983	0.43014	0.65825	-0.054768	-0.56929	-0.060526	-0.56949	-0.70408	-0.59549	-1.07	-0.74258	-0.82757
1454604_s_at	Tspan12	tetraspanin 12	---	0016020 // membrane // inferred from electronic annotation /// 0016021 // integral to membrane // inferred from electronic annotation	---	---	gb:BB072896 /DB_XREF=gi:15406853 /DB_XREF=BB072896 /CLONE=9030619E17 /FEA=EST /CNT=222 /TID=Mm.21950.1 /TIER=Stack /STK=174 /UG=Mm.21950 /LL=58888 /UG_GENE=AI426782 /UG_TITLE=EST AI426782	-0.31793	-0.19432	0.046531	-0.44499	-0.37918	-0.37234	-0.41816	-0.369	-0.24869	-0.98727	-0.65473	-0.98383
1454613_at	Dpysl3	dihydropyrimidinase-like 3	0007399 // nervous system development // inferred from direct assay	0005737 // cytoplasm // inferred from electronic annotation /// 0030426 // growth cone // inferred from electronic annotation /// 0042995 // cell projection // inferred from electronic annotation	0016787 // hydrolase activity // inferred from electronic annotation /// 0016810 // hydrolase activity, acting on carbon-nitrogen (but not peptide) bonds // inferred from electronic annotation	---	gb:AV162270 /DB_XREF=gi:16383390 /DB_XREF=AV162270 /CLONE=3110001I16 /FEA=EST /CNT=280 /TID=Mm.8180.2 /TIER=Stack /STK=151 /UG=Mm.8180 /LL=110454 /UG_GENE=Ly6a /UG_TITLE=lymphocyte antigen 6 complex, locus A	0.068291	0.4622	0.45535	-0.30821	-0.5559	-0.22587	-0.48795	-0.28029	-0.5162	-1.0163	-0.51144	-0.67924
1454867_at	Mn1	meningioma 1	0001957 // intramembranous ossification // inferred from mutant phenotype	---	---	---	gb:BB234631 /DB_XREF=gi:16354698 /DB_XREF=BB234631 /CLONE=A630050G23 /FEA=EST /CNT=62 /TID=Mm.123973.1 /TIER=Stack /STK=40 /UG=Mm.123973 /UG_TITLE=ESTs, Weakly similar to MN1_HUMAN PROBABLE TUMOR SUPPRESSOR PROTEIN MN1 (H.sapiens)	0.63185	0.95765	0.68529	0.2809	0.056758	0.24709	0.23175	0.065279	0.12242	-0.15901	-0.20273	-0.2273
1454965_at	---	---	---	---	---	---	gb:BE980088 /DB_XREF=gi:10647694 /DB_XREF=UI-M-CG0-bcs-c-12-0-UI.s1 /CLONE=UI-M-CG0-bcs-c-12-0-UI /FEA=EST /CNT=45 /TID=Mm.26101.1 /TIER=Stack /STK=32 /UG=Mm.26101 /UG_TITLE=ESTs	0.25084	0.81444	1.0258	0.16785	-0.11135	0.23459	-0.083805	0.031675	-0.058711	-0.51216	-0.074849	-0.17855
1454984_at	Lifr	leukemia inhibitory factor receptor	0008284 // positive regulation of cell proliferation // inferred from genetic interaction /// 0008284 // positive regulation of cell proliferation // not recorded /// 0008284 // positive regulation of cell proliferation // inferred from electronic annotation /// 0019221 // cytokine-mediated signaling pathway // not recorded /// 0031100 // organ regeneration // inferred from electronic annotation …	0005576 // extracellular region // inferred from electronic annotation /// 0005886 // plasma membrane // inferred from electronic annotation /// 0016020 // membrane // inferred from electronic annotation /// 0016021 // integral to membrane // inferred from electronic annotation	0004872 // receptor activity // inferred from electronic annotation /// 0004896 // cytokine receptor activity // inferred from electronic annotation /// 0004897 // ciliary neurotrophic factor receptor activity // inferred from electronic annotation /// 0004923 // leukemia inhibitory factor receptor activity // not recorded /// 0004923 // leukemia inhibitory factor receptor activity // inferred fr…	---	gb:AV246615 /DB_XREF=gi:16387119 /DB_XREF=AV246615 /CLONE=4832413I12 /FEA=EST /CNT=36 /TID=Mm.24003.1 /TIER=Stack /STK=31 /UG=Mm.24003 /LL=106020 /UG_GENE=AW061234 /UG_TITLE=expressed sequence AW061234	-0.10383	0.02697	0.47968	0.064438	-0.016451	-0.1605	-0.31652	-0.0354	-0.096235	-0.55023	-0.57896	-0.51519
1454997_at	Msrb3	methionine sulfoxide reductase B3	0030091 // protein repair // inferred from sequence or structural similarity /// 0055114 // oxidation reduction // inferred from electronic annotation	0005739 // mitochondrion // inferred from direct assay /// 0005739 // mitochondrion // not recorded /// 0005739 // mitochondrion // inferred from electronic annotation /// 0005783 // endoplasmic reticulum // inferred from sequence or structural similarity	0000318 // protein-methionine-R-oxide reductase activity // inferred from sequence or structural similarity /// 0008113 // peptide-methionine-(S)-S-oxide reductase activity // inferred from electronic annotation /// 0008270 // zinc ion binding // inferred from sequence or structural similarity /// 0008270 // zinc ion binding // inferred from electronic annotation /// 0016491 // oxidoreductase act…	---	gb:AV286522 /DB_XREF=gi:15405795 /DB_XREF=AV286522 /CLONE=5031424K13 /FEA=EST /CNT=41 /TID=Mm.25427.1 /TIER=Stack /STK=30 /UG=Mm.25427 /UG_TITLE=ESTs	0.17203	0.34987	0.64622	-0.42096	-0.6892	-0.16313	-0.071567	0.17449	-0.20558	-0.54024	-0.4128	-0.74088
1455090_at	Angptl2	angiopoietin-like 2	0007165 // signal transduction // inferred from electronic annotation	0005576 // extracellular region // inferred from electronic annotation /// 0005615 // extracellular space // inferred from electronic annotation	0005102 // receptor binding // inferred from electronic annotation	---	gb:BF681826 /DB_XREF=gi:11955721 /DB_XREF=602117651F1 /CLONE=IMAGE:3468684 /FEA=EST /CNT=43 /TID=Mm.19081.1 /TIER=Stack /STK=25 /UG=Mm.19081 /LL=99355 /UG_GENE=AW260363 /UG_TITLE=expressed sequence AW260363	0.47539	1.2017	1.1276	0.23676	-0.21044	0.11904	-0.18831	-0.35248	-0.57942	-0.8015	-0.83083	-0.68973
1455096_at	Flrt2	fibronectin leucine rich transmembrane protein 2	---	0016021 // integral to membrane // inferred from electronic annotation	0005515 // protein binding // inferred from electronic annotation	---	gb:AW555664 /DB_XREF=gi:7201087 /DB_XREF=L0257E09-3 /CLONE=L0257E09 /FEA=EST /CNT=29 /TID=Mm.100844.1 /TIER=Stack /STK=25 /UG=Mm.100844 /UG_TITLE=ESTs	0.060843	0.49894	1.0675	-0.084246	-0.46114	-0.11419	-0.4897	-0.17507	-0.51184	-0.83256	-0.56446	-0.8279
1455106_a_at	Ckb	creatine kinase, brain	0007420 // brain development // inferred from electronic annotation /// 0030644 // cellular chloride ion homeostasis // inferred from electronic annotation	0005737 // cytoplasm // inferred from electronic annotation /// 0005739 // mitochondrion // inferred from direct assay	0000166 // nucleotide binding // inferred from electronic annotation /// 0003824 // catalytic activity // inferred from electronic annotation /// 0004111 // creatine kinase activity // inferred from electronic annotation /// 0005515 // protein binding // inferred from electronic annotation /// 0005524 // ATP binding // inferred from electronic annotation /// 0016301 // kinase activity // inferred…	---	gb:BG967663 /DB_XREF=gi:14355300 /DB_XREF=602833466F1 /CLONE=IMAGE:4987744 /FEA=EST /CNT=35 /TID=Mm.16831.2 /TIER=Stack /STK=24 /UG=Mm.16831 /LL=12709 /UG_GENE=Ckb /UG_TITLE=creatine kinase, brain	-0.17517	0.050021	0.32386	-0.41675	-0.51126	-0.60677	-0.61845	-0.67044	-0.97429	-0.89135	-0.84246	-0.77359
1455160_at	2610203C20Rik	RIKEN cDNA 2610203C20 gene	---	---	---	---	gb:BM220421 /DB_XREF=gi:17780488 /DB_XREF=C0940E03-3 /CLONE=C0940E03 /FEA=EST /CNT=39 /TID=Mm.38166.1 /TIER=Stack /STK=22 /UG=Mm.38166 /LL=99733 /UG_GENE=AI848448 /UG_TITLE=expressed sequence AI848448	-0.040185	0.29667	0.74812	-0.38181	-0.23609	-0.27918	-0.46295	-0.071543	-0.44485	-0.79508	-0.54609	-0.88609
1455161_at	AI504432	expressed sequence AI504432	---	---	---	---	gb:BB202185 /DB_XREF=gi:15409753 /DB_XREF=BB202185 /CLONE=A430045A14 /FEA=EST /CNT=39 /TID=Mm.30640.1 /TIER=Stack /STK=22 /UG=Mm.30640 /LL=99661 /UG_GENE=AI504432 /UG_TITLE=expressed sequence AI504432	0.05218	-0.093649	-0.52242	0.15356	0.33222	0.1734	0.28844	0.40399	0.29709	0.63332	0.51109	0.60835
1455277_at	Hhip	Hedgehog-interacting protein	0007165 // signal transduction // inferred from direct assay /// 0007224 // smoothened signaling pathway // inferred from mutant phenotype /// 0007405 // neuroblast proliferation // inferred from genetic interaction /// 0009887 // organ morphogenesis // inferred from mutant phenotype /// 0009953 // dorsal/ventral pattern formation // inferred from genetic interaction /// 0030324 // lung developme…	0005576 // extracellular region // inferred from electronic annotation /// 0005886 // plasma membrane // inferred from electronic annotation /// 0005887 // integral to plasma membrane // inferred from direct assay /// 0009986 // cell surface // inferred from direct assay /// 0016020 // membrane // inferred from electronic annotation /// 0019898 // extrinsic to membrane // inferred from electronic…	0003824 // catalytic activity // inferred from electronic annotation /// 0005515 // protein binding // inferred from physical interaction	---	gb:BB088162 /DB_XREF=gi:16260966 /DB_XREF=BB088162 /CLONE=9430014J21 /FEA=EST /CNT=22 /TID=Mm.119232.1 /TIER=Stack /STK=18 /UG=Mm.119232 /UG_TITLE=ESTs	-0.326	-0.44679	0.080191	-0.61149	-0.67318	-0.57469	-0.58811	-0.33303	-0.39991	-0.92655	-0.85237	-0.66969
1455792_x_at	Ndn	necdin	0001558 // regulation of cell growth // traceable author statement /// 0001764 // neuron migration // inferred from mutant phenotype /// 0006350 // transcription // inferred from electronic annotation /// 0006355 // regulation of transcription, DNA-dependent // inferred from genetic interaction /// 0006874 // cellular calcium ion homeostasis // traceable author statement /// 0007409 // axonogenes…	0005634 // nucleus // inferred from direct assay /// 0005634 // nucleus // inferred from electronic annotation /// 0005654 // nucleoplasm // inferred from electronic annotation /// 0005737 // cytoplasm // inferred from direct assay /// 0005737 // cytoplasm // inferred from electronic annotation /// 0005813 // centrosome // inferred from direct assay /// 0016363 // nuclear matrix // inferred from …	0003677 // DNA binding // inferred from electronic annotation /// 0005102 // receptor binding // inferred from electronic annotation /// 0005515 // protein binding // inferred from physical interaction /// 0005515 // protein binding // inferred from electronic annotation /// 0008022 // protein C-terminus binding // inferred from electronic annotation /// 0042803 // protein homodimerization activi…	---	gb:AV124445 /DB_XREF=gi:5310679 /DB_XREF=AV124445 /CLONE=2700018J21 /FEA=EST /CNT=104 /TID=Mm.7089.3 /TIER=Stack /STK=102 /UG=Mm.7089 /LL=17984 /UG_GENE=Ndn /UG_TITLE=necdin	0.041557	0.2752	0.55064	-0.31883	-0.7242	-0.12823	-0.48283	-0.32719	-0.49824	-1.1232	-0.76458	-1.2261
1455862_at	Ubtd2	ubiquitin domain containing 2	---	0005737 // cytoplasm // inferred from electronic annotation	---	---	gb:BB131620 /DB_XREF=gi:15408397 /DB_XREF=BB131620 /CLONE=9630054F20 /FEA=EST /CNT=74 /TID=Mm.27457.1 /TIER=Stack /STK=34 /UG=Mm.27457 /LL=103808 /UG_GENE=AI645720 /UG_TITLE=expressed sequence AI645720	0.053111	0.5586	0.86923	-0.057036	-0.27912	-0.13875	-0.38532	-0.10787	-0.033229	-0.58179	-0.41661	-0.52909
1455872_at	Fam167a	family with sequence similarity 167, member A	---	---	---	---	gb:BB151460 /DB_XREF=gi:16267936 /DB_XREF=BB151460 /CLONE=A030013D21 /FEA=EST /CNT=36 /TID=Mm.37882.1 /TIER=Stack /STK=33 /UG=Mm.37882 /UG_TITLE=ESTs	0.092695	0.3725	0.6314	0.051064	-0.52866	-0.11884	-0.40039	-0.34151	-0.43268	-0.71601	-0.31183	-0.56782
1455901_at	Chpt1	choline phosphotransferase 1	0006656 // phosphatidylcholine biosynthetic process // inferred from sequence or structural similarity /// 0006663 // platelet activating factor biosynthetic process // inferred from sequence or structural similarity /// 0008654 // phospholipid biosynthetic process // inferred from electronic annotation	0005794 // Golgi apparatus // inferred from electronic annotation /// 0016020 // membrane // inferred from electronic annotation /// 0016021 // integral to membrane // inferred from electronic annotation	0000287 // magnesium ion binding // inferred from electronic annotation /// 0004142 // diacylglycerol cholinephosphotransferase activity // inferred from electronic annotation /// 0004142 // diacylglycerol cholinephosphotransferase activity // inferred from sequence or structural similarity /// 0016740 // transferase activity // inferred from electronic annotation /// 0016780 // phosphotransferas…	---	gb:AI642069 /DB_XREF=gi:4720544 /DB_XREF=ub75d10.x1 /CLONE=IMAGE:1383571 /FEA=EST /CNT=121 /TID=Mm.21754.4 /TIER=Stack /STK=27 /UG=Mm.21754 /UG_TITLE=Mus musculus 10 day old male pancreas cDNA, RIKEN full-length enriched library, clone:1810073D20:synaptonemal complex protein 3, full insert sequence	-0.41666	-0.30972	-0.028753	-0.84517	-0.87	-0.75759	-0.69115	-0.31129	0.10529	-1.0143	-0.56263	-1.1855
1456073_s_at	Panx3	pannexin 3	0007267 // cell-cell signaling // inferred from electronic annotation	0005886 // plasma membrane // inferred from electronic annotation /// 0005921 // gap junction // inferred from electronic annotation /// 0016020 // membrane // inferred from electronic annotation /// 0016021 // integral to membrane // inferred from electronic annotation /// 0030054 // cell junction // inferred from electronic annotation	---	---	gb:AV220875 /DB_XREF=gi:16384698 /DB_XREF=AV220875 /CLONE=3230401P04 /FEA=EST /CNT=18 /TID=Mm.48983.1 /TIER=Stack /STK=17 /UG=Mm.48983 /UG_TITLE=ESTs	-0.3623	0.019389	0.46916	-0.38577	-0.71915	-0.33247	-0.81312	-0.59715	-0.25309	-1.5487	-1.4325	-1.3504
1456328_at	Bank1	B-cell scaffold protein with ankyrin repeats 1	0006874 // cellular calcium ion homeostasis // not recorded /// 0042113 // B cell activation // inferred from electronic annotation	---	0005102 // receptor binding // not recorded /// 0019901 // protein kinase binding // not recorded	---	gb:AI451642 /DB_XREF=gi:4305427 /DB_XREF=mu55c08.x1 /CLONE=IMAGE:643310 /FEA=EST /CNT=30 /TID=Mm.30832.1 /TIER=Stack /STK=11 /UG=Mm.30832 /LL=99642 /UG_GENE=AI451642 /UG_TITLE=expressed sequence AI451642	0.2534	-0.05521	-0.52471	0.43712	0.50155	0.32597	0.3502	0.31915	-0.27683	0.64772	0.39233	0.50149
1456344_at	Tnc	Tenascin C	0007155 // cell adhesion // inferred from electronic annotation /// 0007165 // signal transduction // inferred from electronic annotation /// 0007528 // neuromuscular junction development // inferred from mutant phenotype /// 0009611 // response to wounding // inferred from electronic annotation /// 0060739 // mesenchymal-epithelial cell signaling involved in prostate gland development // inferre…	0005576 // extracellular region // inferred from direct assay /// 0005576 // extracellular region // inferred from electronic annotation /// 0005578 // proteinaceous extracellular matrix // inferred from electronic annotation /// 0005604 // basement membrane // inferred from direct assay	0001968 // fibronectin binding // not recorded /// 0005102 // receptor binding // inferred from electronic annotation /// 0005515 // protein binding // inferred from electronic annotation	---	gb:BB003393 /DB_XREF=gi:16214791 /DB_XREF=BB003393 /CLONE=4732454O18 /FEA=EST /CNT=13 /TID=Mm.209039.1 /TIER=Stack /STK=11 /UG=Mm.209039 /UG_TITLE=ESTs, Weakly similar to Tenascin (H.sapiens)	-0.41839	-0.084908	0.55436	-0.70439	-0.50765	-0.53449	-0.84541	-0.23324	-0.58863	-0.75113	-0.92501	-1.0572
1456424_s_at	Pltp	phospholipid transfer protein	0006810 // transport // inferred from electronic annotation /// 0006869 // lipid transport // inferred from electronic annotation	0005576 // extracellular region // inferred from electronic annotation	0008289 // lipid binding // inferred from electronic annotation	---	gb:AI591480 /DB_XREF=gi:4600528 /DB_XREF=vt15g11.x1 /CLONE=IMAGE:1163204 /FEA=EST /CNT=13 /TID=Mm.7046.3 /TIER=Stack /STK=10 /UG=Mm.7046 /LL=19025 /UG_GENE=Ppgb /UG_TITLE=protective protein for beta-galactosidase	0.39462	0.91514	1.0219	0.51001	0.047226	0.43537	0.012967	0.19997	0.006476	0.035497	-0.13105	-0.15002
1456437_x_at	C1r /// C1rb	complement component 1, r subcomponent /// complement component 1, r subcomponent B	0006508 // proteolysis // inferred from electronic annotation /// 0006955 // immune response // inferred from electronic annotation /// 0006958 // complement activation, classical pathway // inferred from electronic annotation /// 0045087 // innate immune response // inferred from electronic annotation	---	0003824 // catalytic activity // inferred from electronic annotation /// 0004252 // serine-type endopeptidase activity // inferred from electronic annotation /// 0005509 // calcium ion binding // inferred from electronic annotation /// 0008233 // peptidase activity // inferred from electronic annotation /// 0008236 // serine-type peptidase activity // inferred from electronic annotation /// 00167…	Complement_Activation_Classical // GenMAPP	gb:BB558917 /DB_XREF=gi:9645283 /DB_XREF=BB558917 /CLONE=E330036H09 /FEA=EST /CNT=11 /TID=Mm.24276.3 /TIER=Stack /STK=10 /UG=Mm.24276 /LL=50909 /UG_GENE=C1r /UG_TITLE=complement component 1, r subcomponent	0.70074	1.2948	1.032	0.83955	0.53229	1.0347	0.26208	0.40371	0.092709	-0.18284	-0.06863	-0.10793
1456440_s_at	St8sia6	ST8 alpha-N-acetyl-neuraminide alpha-2,8-sialyltransferase 6	0006486 // protein amino acid glycosylation // inferred from electronic annotation /// 0006493 // protein amino acid O-linked glycosylation // inferred from direct assay /// 0009247 // glycolipid biosynthetic process // inferred from direct assay /// 0016051 // carbohydrate biosynthetic process // inferred from direct assay	0005794 // Golgi apparatus // inferred from electronic annotation /// 0016020 // membrane // inferred from electronic annotation /// 0016021 // integral to membrane // inferred from sequence or structural similarity /// 0016021 // integral to membrane // inferred from electronic annotation /// 0030173 // integral to Golgi membrane // inferred from electronic annotation	0008373 // sialyltransferase activity // inferred from direct assay /// 0008373 // sialyltransferase activity // inferred from electronic annotation /// 0016740 // transferase activity // inferred from electronic annotation /// 0016757 // transferase activity, transferring glycosyl groups // inferred from electronic annotation	---	gb:AV375081 /DB_XREF=gi:15412275 /DB_XREF=AV375081 /CLONE=9130020J17 /FEA=EST /CNT=19 /TID=Mm.24267.2 /TIER=Stack /STK=10 /UG=Mm.24267 /LL=98897 /UG_GENE=AI314453 /UG_TITLE=expressed sequence AI314453	-0.18833	0.026178	0.36671	-0.24961	-0.28868	-0.47377	-0.54397	-0.23451	-0.33911	-0.72626	-0.50663	-0.67645
1456515_s_at	Tcfl5	transcription factor-like 5 (basic helix-loop-helix)	0006355 // regulation of transcription, DNA-dependent // inferred from electronic annotation /// 0007283 // spermatogenesis // inferred from electronic annotation /// 0007283 // spermatogenesis // inferred from sequence or structural similarity /// 0042127 // regulation of cell proliferation // inferred from electronic annotation /// 0042127 // regulation of cell proliferation // inferred from se…	0001673 // male germ cell nucleus // inferred from direct assay /// 0005634 // nucleus // inferred from electronic annotation /// 0005634 // nucleus // inferred from sequence or structural similarity	0003677 // DNA binding // inferred from direct assay /// 0030528 // transcription regulator activity // inferred from electronic annotation	---	gb:AV044715 /DB_XREF=gi:4864380 /DB_XREF=AV044715 /CLONE=1700038G11 /FEA=EST /CNT=12 /TID=Mm.141312.2 /TIER=Stack /STK=9 /UG=Mm.141312 /LL=12841 /UG_GENE=Col9a3 /UG_TITLE=procollagen, type IX, alpha 3	-0.20187	0.58451	0.37571	-0.51257	-0.88307	-0.18505	-0.60937	-0.52441	-0.58906	-0.85735	-0.85871	-0.88195
1456601_x_at	Fxyd2	FXYD domain-containing ion transport regulator 2	0006810 // transport // inferred from electronic annotation /// 0006811 // ion transport // inferred from electronic annotation /// 0006813 // potassium ion transport // inferred from electronic annotation /// 0006814 // sodium ion transport // inferred from electronic annotation	0016020 // membrane // inferred from electronic annotation /// 0016021 // integral to membrane // inferred from electronic annotation	0005216 // ion channel activity // inferred from electronic annotation /// 0030955 // potassium ion binding // inferred from electronic annotation /// 0031402 // sodium ion binding // inferred from electronic annotation	Calcium_regulation_in_cardiac_cells // GenMAPP	gb:AV002675 /DB_XREF=gi:4779525 /DB_XREF=AV002675 /CLONE=0610019I02 /FEA=EST /CNT=45 /TID=Mm.22742.5 /TIER=Stack /STK=8 /UG=Mm.22742 /LL=11936 /UG_GENE=Fxyd2 /UG_TITLE=FXYD domain-containing ion transport regulator 2	-0.45377	-0.36813	0.27564	-0.7913	-0.92382	-0.79261	-0.69088	-0.64489	-0.45204	-1.0897	-1.1262	-0.89069
1456739_x_at	Armcx2	armadillo repeat containing, X-linked 2	---	0016020 // membrane // inferred from electronic annotation /// 0016021 // integral to membrane // inferred from electronic annotation	0005488 // binding // inferred from electronic annotation	---	gb:BB392869 /DB_XREF=gi:9115836 /DB_XREF=BB392869 /CLONE=C230080O14 /FEA=EST /CNT=8 /TID=Mm.27714.7 /TIER=Stack /STK=8 /UG=Mm.27714 /LL=67416 /UG_GENE=3230401N03Rik /UG_TITLE=RIKEN cDNA 3230401N03 gene	-0.06211	0.31739	0.49426	-0.23249	-0.66497	-0.35685	-0.51042	-0.22393	-0.11381	-0.74895	-0.35147	-0.66001
1456787_at	---	---	---	---	---	---	gb:BM220188 /DB_XREF=gi:17780210 /DB_XREF=C0936F08-3 /CLONE=C0936F08 /FEA=EST /CNT=9 /TID=Mm.169436.1 /TIER=ConsEnd /STK=7 /UG=Mm.169436 /UG_TITLE=ESTs	-0.088722	0.36717	0.35061	-0.49421	-0.48591	0.018109	-0.52675	-0.13753	-0.20708	-0.94709	-0.58958	-0.76599
1456789_at	Zfp462	zinc finger protein 462	0043392 // negative regulation of DNA binding // inferred from direct assay /// 0045944 // positive regulation of transcription from RNA polymerase II promoter // inferred from direct assay	0005622 // intracellular // inferred from electronic annotation /// 0005634 // nucleus // inferred from direct assay	0008270 // zinc ion binding // inferred from electronic annotation	---	gb:AW491540 /DB_XREF=gi:7061821 /DB_XREF=UI-M-BH3-atp-e-01-0-UI.s1 /CLONE=UI-M-BH3-atp-e-01-0-UI /FEA=EST /CNT=15 /TID=Mm.101959.1 /TIER=ConsEnd /STK=7 /UG=Mm.101959 /UG_TITLE=ESTs	0.026816	0.22956	0.38232	-0.40966	-0.33742	-0.23415	-0.34583	0.11588	-0.039814	-0.8946	-0.50184	-0.70975
[truncated: 17 more rows]

## Sheet: 406 DAVID Analysis
Annotation Cluster 1	Enrichment Score: 23.539737211684663
[truncated: 347 more rows]

[truncated: 2 more sheets: 25 up-regulated only, 25 up-regulated only DAVID]
