# Supplementary material for: Disease Progression and Phasic Changes in Gene Expression in a Mouse Model of Osteoarthritis
Source: PLoS One. 2013 Jan 28;8(1):e54633. doi: 10.1371/journal.pone.0054633 (PMC3557277; doi:10.1371/journal.pone.0054633)
Supplement: File S2 — Excel file of 427 DMM filtered probe sets and DAVID results. Results are presented as signal log ratio as described for supplemental file 1. (XLSX) [file pone.0054633.s004.xlsx]

## Sheet: 427 Gene Details
Probe Set ID	Consensus Cluster#	Gene Symbol	Gene Title	Gene Ontology Biological Process	Gene Ontology Cellular Component	Gene Ontology Molecular Function	Pathway	Target Description	2wk SLR DMM rep2	2wk SLR DMM rep3	4wk SLR DMM rep1	4wk SLR DMM rep2	4wk SLR DMM rep3	8wk SLR DMM rep1	8wk SLR DMM rep2	8wk SLR DMM rep3	16wk SLR DMM rep1	16wk SLR DMM rep2	16wk SLR DMM rep3
1415870_at	1	Calu	calumenin	---	0005576 // extracellular region // inferred from electronic annotation /// 0005783 // endoplasmic reticulum // inferred from electronic annotation /// 0005788 // endoplasmic reticulum lumen // inferred from electronic annotation /// 0016529 // sarcoplasmic reticulum // inferred from electronic annotation /// 0033018 // sarcoplasmic reticulum lumen // inferred from electronic annotation /// 004247…	0005509 // calcium ion binding // inferred from direct assay /// 0005509 // calcium ion binding // inferred from electronic annotation	---	gb:NM_007594.1 /DB_XREF=gi:6680839 /GEN=Calu /FEA=FLmRNA /CNT=355 /TID=Mm.7515.1 /TIER=FL+Stack /STK=191 /UG=Mm.7515 /LL=12321 /DEF=Mus musculus calumenin (Calu), mRNA. /PROD=calumenin /FL=gb:U81829.1 gb:NM_007594.1	0.49777	0.6799	0.57949	0.95882	0.89213	0.2623	0.27249	0.13628	0.36296	0.25971	0.27624
1417301_at	1	Fzd6	frizzled homolog 6 (Drosophila)	0001736 // establishment of planar polarity // inferred from genetic interaction /// 0001843 // neural tube closure // inferred from genetic interaction /// 0007165 // signal transduction // inferred from electronic annotation /// 0007166 // cell surface receptor linked signal transduction // inferred from electronic annotation /// 0007186 // G-protein coupled receptor protein signaling pathway /…	0016020 // membrane // inferred from electronic annotation /// 0016021 // integral to membrane // inferred from electronic annotation /// 0016327 // apicolateral plasma membrane // inferred from direct assay /// 0045177 // apical part of cell // inferred from direct assay	0004871 // signal transducer activity // inferred from electronic annotation /// 0004872 // receptor activity // inferred from electronic annotation /// 0004888 // transmembrane receptor activity // inferred from electronic annotation /// 0004926 // non-G-protein coupled 7TM receptor activity // inferred from electronic annotation /// 0004930 // G-protein coupled receptor activity // inferred fro…	Wnt_Signaling // GenMAPP	gb:BC026150.1 /DB_XREF=gi:20072156 /FEA=FLmRNA /CNT=68 /TID=Mm.4769.1 /TIER=FL+Stack /STK=49 /UG=Mm.4769 /LL=14368 /UG_GENE=Fzd6 /DEF=Mus musculus, frizzled homolog 6 (Drosophila), clone MGC:14004 IMAGE:3983985, mRNA, complete cds. /PROD=frizzled homolog 6 (Drosophila) /FL=gb:NM_008056.1 gb:BC026150.1 gb:U43319.1	0.5343	0.64364	0.53376	0.60957	0.69582	0.2176	0.28666	0.14983	0.31872	0.20162	0.11377
1417599_at	1	Cd276	CD276 antigen	0030501 // positive regulation of bone mineralization // inferred from mutant phenotype /// 0042102 // positive regulation of T cell proliferation // inferred from electronic annotation /// 0042110 // T cell activation // inferred from electronic annotation /// 0042130 // negative regulation of T cell proliferation // inferred from direct assay /// 0042130 // negative regulation of T cell prolife…	0009897 // external side of plasma membrane // inferred from direct assay /// 0016020 // membrane // inferred from electronic annotation /// 0016021 // integral to membrane // inferred from electronic annotation	0005102 // receptor binding // inferred from direct assay /// 0005102 // receptor binding // inferred from mutant phenotype /// 0005515 // protein binding // inferred from sequence or structural similarity	---	gb:NM_133983.1 /DB_XREF=gi:19527205 /GEN=AU016588 /FEA=FLmRNA /CNT=75 /TID=Mm.5356.1 /TIER=FL+Stack /STK=41 /UG=Mm.5356 /LL=102657 /DEF=Mus musculus expressed sequence AU016588 (AU016588), mRNA. /PROD=expressed sequence AU016588 /FL=gb:BC019436.1 gb:NM_133983.1	0.5798	0.44274	0.57007	0.897	0.94163	0.28442	0.15377	-0.030024	0.37995	0.23831	0.081511
1417654_at	1	Sdc4	syndecan 4	0006937 // regulation of muscle contraction // inferred from electronic annotation /// 0045860 // positive regulation of protein kinase activity // inferred from electronic annotation	0005794 // Golgi apparatus // inferred from electronic annotation /// 0005886 // plasma membrane // inferred from electronic annotation /// 0005925 // focal adhesion // inferred from electronic annotation /// 0009986 // cell surface // inferred from direct assay /// 0016020 // membrane // inferred from electronic annotation /// 0016021 // integral to membrane // inferred from electronic annotatio…	0008092 // cytoskeletal protein binding // inferred from electronic annotation /// 0051018 // protein kinase A binding // inferred from electronic annotation /// 0051393 // alpha-actinin binding // inferred from electronic annotation /// 0070053 // thrombospondin receptor activity // inferred from electronic annotation	---	gb:NM_011521.1 /DB_XREF=gi:6755441 /GEN=Sdc4 /FEA=FLmRNA /CNT=177 /TID=Mm.3815.1 /TIER=FL+Stack /STK=39 /UG=Mm.3815 /LL=20971 /DEF=Mus musculus syndecan 4 (Sdc4), mRNA. /PROD=syndecan 4 /FL=gb:D89571.1 gb:NM_011521.1 gb:BC005679.1	0.50328	0.51499	0.53305	0.96187	0.7903	0.31964	0.39442	0.13268	0.24193	0.19839	0.076283
1418455_at	1	Copz2	coatomer protein complex, subunit zeta 2	0006810 // transport // inferred from electronic annotation /// 0006886 // intracellular protein transport // inferred from electronic annotation /// 0015031 // protein transport // inferred from electronic annotation /// 0016192 // vesicle-mediated transport // inferred from electronic annotation	0005737 // cytoplasm // inferred from electronic annotation /// 0005794 // Golgi apparatus // inferred from electronic annotation /// 0016020 // membrane // inferred from electronic annotation /// 0030117 // membrane coat // inferred from electronic annotation /// 0030126 // COPI vesicle coat // not recorded /// 0030137 // COPI-coated vesicle // inferred from sequence or structural similarity ///…	0005515 // protein binding // inferred from electronic annotation	---	gb:NM_019877.1 /DB_XREF=gi:9845241 /GEN=Copz2 /FEA=FLmRNA /CNT=55 /TID=Mm.22144.1 /TIER=FL+Stack /STK=23 /UG=Mm.22144 /LL=56358 /DEF=Mus musculus coatomer protein complex, subunit zeta 2 (Copz2), mRNA. /PROD=coatomer protein complex, subunit zeta 2 /FL=gb:NM_019877.1 gb:AF237687.1 gb:AB040137.1 gb:BC025122.1 gb:AB047850.1	0.29929	0.54255	0.50039	0.88594	0.90823	-0.1109	0.089633	-0.081168	0.4282	0.33115	0.33921
1418673_at	1	Snai2	snail homolog 2 (Drosophila)	0006350 // transcription // inferred from electronic annotation /// 0007275 // multicellular organismal development // inferred from electronic annotation /// 0009314 // response to radiation // inferred from direct assay /// 0009314 // response to radiation // inferred from mutant phenotype /// 0045449 // regulation of transcription // inferred from electronic annotation /// 0045884 // regulatio…	0005622 // intracellular // inferred from electronic annotation /// 0005634 // nucleus // inferred from direct assay /// 0005634 // nucleus // inferred from electronic annotation	0003676 // nucleic acid binding // inferred from electronic annotation /// 0003677 // DNA binding // inferred from electronic annotation /// 0008270 // zinc ion binding // inferred from electronic annotation /// 0046872 // metal ion binding // inferred from electronic annotation	---	gb:NM_011415.1 /DB_XREF=gi:6755575 /GEN=Snai2 /FEA=FLmRNA /CNT=33 /TID=Mm.4272.1 /TIER=FL+Stack /STK=20 /UG=Mm.4272 /LL=20583 /DEF=Mus musculus snail homolog 2 (Drosophila) (Snai2), mRNA. /PROD=snail homolog 2 (Drosophila) /FL=gb:NM_011415.1 gb:U79550.1 gb:U97059.1	0.36538	0.19412	0.53469	0.93064	1.0562	0.21144	0.16639	-0.01566	0.34441	0.20724	0.026591
1419816_s_at	1	Errfi1	ERBB receptor feedback inhibitor 1	0031098 // stress-activated protein kinase signaling pathway // not recorded	0005737 // cytoplasm // inferred from electronic annotation /// 0005829 // cytosol // not recorded	0004872 // receptor activity // inferred from electronic annotation /// 0005515 // protein binding // inferred from physical interaction	---	gb:AI788755 /DB_XREF=gi:5336471 /DB_XREF=uk53e11.x1 /CLONE=IMAGE:1972748 /FEA=EST /CNT=1 /TID=Mm.200246.2 /TIER=ConsEnd /STK=1 /UG=Mm.200246 /LL=100200 /UG_GENE=AI788755 /UG_TITLE=expressed sequence AI788755	0.059149	0.79259	0.70089	1.0593	0.36368	0.071183	0.271	0.16265	-0.14312	0.063476	-0.15222
1425528_at	1	Prrx1	paired related homeobox 1	0002053 // positive regulation of mesenchymal cell proliferation // inferred from genetic interaction /// 0006355 // regulation of transcription, DNA-dependent // inferred from electronic annotation /// 0007275 // multicellular organismal development // inferred from electronic annotation /// 0030326 // embryonic limb morphogenesis // inferred from genetic interaction /// 0042472 // inner ear mor…	0005634 // nucleus // inferred from direct assay /// 0005634 // nucleus // inferred from electronic annotation	0003677 // DNA binding // inferred from direct assay /// 0003677 // DNA binding // inferred from electronic annotation /// 0003700 // transcription factor activity // inferred from electronic annotation /// 0030528 // transcription regulator activity // inferred from electronic annotation /// 0043565 // sequence-specific DNA binding // inferred from electronic annotation	---	gb:BQ175427 /DB_XREF=gi:20350919 /DB_XREF=UI-M-DJ2-bwc-f-24-0-UI.s1 /CLONE=UI-M-DJ2-bwc-f-24-0-UI /FEA=FLmRNA /CNT=86 /TID=Mm.3869.2 /TIER=Stack /STK=24 /UG=Mm.3869 /LL=18933 /UG_GENE=Prrx1 /UG_TITLE=paired related homeobox 1 /FL=gb:L06502.1 gb:U03873.1	0.44502	0.7844	0.69792	0.84213	1.1799	0.22118	0.26015	0.098287	0.48634	0.34364	0.38782
1426238_at	1	Bmp1	bone morphogenetic protein 1	0001503 // ossification // inferred from electronic annotation /// 0006508 // proteolysis // inferred from electronic annotation /// 0007275 // multicellular organismal development // inferred from electronic annotation /// 0030154 // cell differentiation // inferred from electronic annotation /// 0051216 // cartilage development // inferred from electronic annotation	0005615 // extracellular space // inferred from electronic annotation /// 0031988 // membrane-bounded vesicle // inferred from electronic annotation	0004222 // metalloendopeptidase activity // traceable author statement /// 0004222 // metalloendopeptidase activity // inferred from electronic annotation /// 0005125 // cytokine activity // inferred from electronic annotation /// 0005509 // calcium ion binding // inferred from electronic annotation /// 0008083 // growth factor activity // inferred from electronic annotation /// 0008233 // peptid…	---	gb:L24755.1 /DB_XREF=gi:439606 /GEN=Bmp-1 /FEA=FLmRNA /CNT=91 /TID=Mm.27757.1 /TIER=FL+Stack /STK=29 /UG=Mm.27757 /LL=12153 /DEF=Mus musculus bone morphogenetic protein (Bmp-1) mRNA, complete cds. /PROD=bone morphogenetic protein /FL=gb:L24755.1	0.32964	0.34834	0.51666	0.81715	0.75653	0.14393	0.24093	0.11469	0.40255	0.31973	0.2476
1427048_at	1	Smo	smoothened homolog (Drosophila)	0001570 // vasculogenesis // inferred from mutant phenotype /// 0001649 // osteoblast differentiation // inferred from mutant phenotype /// 0001708 // cell fate specification // inferred from mutant phenotype /// 0001755 // neural crest cell migration // inferred from genetic interaction /// 0002052 // positive regulation of neuroblast proliferation // inferred from genetic interaction /// 000300…	0005929 // cilium // inferred from direct assay /// 0016020 // membrane // inferred from electronic annotation /// 0016021 // integral to membrane // inferred from electronic annotation /// 0043025 // cell soma // inferred from electronic annotation	0004871 // signal transducer activity // inferred from electronic annotation /// 0004872 // receptor activity // inferred from electronic annotation /// 0004888 // transmembrane receptor activity // inferred from electronic annotation /// 0004926 // non-G-protein coupled 7TM receptor activity // inferred from electronic annotation /// 0004930 // G-protein coupled receptor activity // inferred fro…	GPCRDB_Other // GenMAPP	gb:AW555326 /DB_XREF=gi:7200737 /DB_XREF=L0252H03-3 /CLONE=L0252H03 /FEA=mRNA /CNT=61 /TID=Mm.29279.1 /TIER=Stack /STK=21 /UG=Mm.29279 /LL=20596 /UG_GENE=Smoh /UG_TITLE=smoothened homolog (Drosophila)	0.17181	0.30358	0.72556	0.9788	0.8556	0.23644	0.36921	0.13999	0.27019	0.17338	-0.023141
1427049_s_at	1	Smo	smoothened homolog (Drosophila)	0001570 // vasculogenesis // inferred from mutant phenotype /// 0001649 // osteoblast differentiation // inferred from mutant phenotype /// 0001708 // cell fate specification // inferred from mutant phenotype /// 0001755 // neural crest cell migration // inferred from genetic interaction /// 0002052 // positive regulation of neuroblast proliferation // inferred from genetic interaction /// 000300…	0005929 // cilium // inferred from direct assay /// 0016020 // membrane // inferred from electronic annotation /// 0016021 // integral to membrane // inferred from electronic annotation /// 0043025 // cell soma // inferred from electronic annotation	0004871 // signal transducer activity // inferred from electronic annotation /// 0004872 // receptor activity // inferred from electronic annotation /// 0004888 // transmembrane receptor activity // inferred from electronic annotation /// 0004926 // non-G-protein coupled 7TM receptor activity // inferred from electronic annotation /// 0004930 // G-protein coupled receptor activity // inferred fro…	GPCRDB_Other // GenMAPP	gb:AW555326 /DB_XREF=gi:7200737 /DB_XREF=L0252H03-3 /CLONE=L0252H03 /FEA=mRNA /CNT=61 /TID=Mm.29279.1 /TIER=Stack /STK=21 /UG=Mm.29279 /LL=20596 /UG_GENE=Smoh /UG_TITLE=smoothened homolog (Drosophila)	0.36397	0.36113	0.67474	0.98494	0.98726	0.30113	0.29125	0.14896	0.34453	0.27851	0.012827
1428115_a_at	1	Rab2b	RAB2B, member RAS oncogene family	0006810 // transport // inferred from electronic annotation /// 0007264 // small GTPase mediated signal transduction // inferred from electronic annotation /// 0015031 // protein transport // inferred from electronic annotation /// 0016192 // vesicle-mediated transport // inferred from electronic annotation	0000139 // Golgi membrane // inferred from electronic annotation /// 0005783 // endoplasmic reticulum // inferred from electronic annotation /// 0005789 // endoplasmic reticulum membrane // inferred from electronic annotation /// 0005794 // Golgi apparatus // inferred from electronic annotation /// 0005886 // plasma membrane // inferred from electronic annotation /// 0016020 // membrane // inferr…	0000166 // nucleotide binding // inferred from electronic annotation /// 0005525 // GTP binding // inferred from electronic annotation	---	gb:AK005230.1 /DB_XREF=gi:12837641 /FEA=mRNA /CNT=126 /TID=Mm.32870.1 /TIER=Stack /STK=108 /UG=Mm.32870 /LL=76338 /UG_GENE=1500012D09Rik /UG_TITLE=RIKEN cDNA 1500012D09 gene /DEF=Mus musculus adult male cerebellum cDNA, RIKEN full-length enriched library, clone:1500012D09:similar to RAS-RELATED PROTEIN RAB-2, full insert sequence.	0.4413	0.2993	0.7467	0.91571	0.87973	0.16012	0.1721	0.16296	0.39928	0.23932	0.051136
1428808_at	1	Prickle2	prickle-like 2 (Drosophila)	0045197 // establishment or maintenance of epithelial cell apical/basal polarity // inferred from direct assay	0005634 // nucleus // inferred from electronic annotation /// 0005737 // cytoplasm // inferred from electronic annotation /// 0016020 // membrane // inferred from electronic annotation /// 0016327 // apicolateral plasma membrane // inferred from direct assay /// 0016328 // lateral plasma membrane // inferred from direct assay /// 0031965 // nuclear membrane // inferred from electronic annotation	0008270 // zinc ion binding // inferred from electronic annotation /// 0046872 // metal ion binding // inferred from electronic annotation	---	gb:BQ177191 /DB_XREF=gi:20352683 /DB_XREF=UI-M-DJ2-bwa-j-20-0-UI.s1 /CLONE=UI-M-DJ2-bwa-j-20-0-UI /FEA=mRNA /CNT=29 /TID=Mm.45021.1 /TIER=Stack /STK=21 /UG=Mm.45021 /LL=76124 /UG_GENE=6230400G14Rik /UG_TITLE=RIKEN cDNA 6230400G14 gene	0.53704	0.52108	0.50577	0.8218	0.67727	0.29481	0.18137	0.098973	0.38542	0.046687	0.24447
1429679_at	1	Lrrc17	leucine rich repeat containing 17	---	---	0005515 // protein binding // inferred from electronic annotation	---	gb:BB503935 /DB_XREF=gi:16442672 /DB_XREF=BB503935 /CLONE=D630045M24 /FEA=mRNA /CNT=55 /TID=Mm.28012.1 /TIER=Stack /STK=10 /UG=Mm.28012 /LL=74511 /UG_GENE=P37nb-pending /UG_TITLE=37 kDa leucine-rich repeat (LRR) protein	0.63272	0.89014	0.65958	0.79653	0.81462	0.56168	0.58298	0.047235	0.20077	0.2653	0.058366
1430388_a_at	1	Sulf2	sulfatase 2	0006350 // transcription // inferred from electronic annotation /// 0006355 // regulation of transcription, DNA-dependent // inferred from electronic annotation /// 0006790 // sulfur metabolic process // not recorded /// 0007165 // signal transduction // inferred from electronic annotation /// 0008152 // metabolic process // inferred from electronic annotation /// 0033148 // positive regulation o…	0005615 // extracellular space // not recorded /// 0005634 // nucleus // inferred from electronic annotation /// 0005634 // nucleus // inferred from direct assay /// 0005737 // cytoplasm // inferred from electronic annotation /// 0005783 // endoplasmic reticulum // inferred from electronic annotation /// 0005794 // Golgi apparatus // inferred from electronic annotation /// 0005795 // Golgi stack …	0003677 // DNA binding // inferred from electronic annotation /// 0003682 // chromatin binding // inferred from direct assay /// 0003713 // transcription coactivator activity // inferred from electronic annotation /// 0003824 // catalytic activity // inferred from electronic annotation /// 0004065 // arylsulfatase activity // not recorded /// 0004065 // arylsulfatase activity // inferred from ele…	---	gb:AK008108.1 /DB_XREF=gi:12842085 /FEA=mRNA /CNT=6 /TID=Mm.35807.2 /TIER=ConsEnd /STK=2 /UG=Mm.35807 /LL=72043 /UG_GENE=2010004N24Rik /UG_TITLE=RIKEN cDNA 2010004N24 gene /DEF=Mus musculus adult male small intestine cDNA, RIKEN full-length enriched library, clone:2010004N24:homolog to KIAA1247 PROTEIN (FRAGMENT), full insert sequence.	0.45222	1.1703	0.74097	1.0338	1.0898	0.49059	0.47527	0.36491	0.46751	0.21203	0.39545
1431079_at	1	C1qtnf2	C1q and tumor necrosis factor related protein 2	0000187 // activation of MAPK activity // inferred from direct assay /// 0045725 // positive regulation of glycogen biosynthetic process // inferred from direct assay /// 0046321 // positive regulation of fatty acid oxidation // inferred from direct assay /// 0046326 // positive regulation of glucose import // inferred from direct assay /// 0051260 // protein homooligomerization // inferred from …	0005576 // extracellular region // inferred from electronic annotation /// 0005615 // extracellular space // inferred from direct assay	0005102 // receptor binding // inferred from direct assay	---	gb:BF148029 /DB_XREF=gi:11029424 /DB_XREF=uw93d01.x1 /CLONE=IMAGE:3469537 /FEA=mRNA /CNT=15 /TID=Mm.24994.1 /TIER=ConsEnd /STK=0 /UG=Mm.24994 /LL=69183 /UG_GENE=1810033K05Rik /UG_TITLE=RIKEN cDNA 1810033K05 gene	0.27031	0.84476	0.67333	0.72931	1.0332	0.29595	0.45189	0.23571	0.11557	0.28002	0.37816
1433184_at	1	6720477C19Rik	RIKEN cDNA 6720477C19 gene	---	---	---	---	gb:AK020162.1 /DB_XREF=gi:12860663 /FEA=mRNA /CNT=1 /TID=Mm.159982.1 /TIER=ConsEnd /STK=0 /UG=Mm.159982 /LL=77731 /UG_GENE=6720477C19Rik /UG_TITLE=RIKEN cDNA 6720477C19 gene /DEF=Mus musculus 12 days embryo male wolffian duct includes surrounding region cDNA, RIKEN full-length enriched library, clone:6720477C19:unclassifiable, full insert sequence.	0.5858	0.55405	0.52488	1.044	0.93896	-0.10388	0.28623	-0.054455	0.32581	0.12709	0.01913
1433670_at	1	Emp2	epithelial membrane protein 2	---	0016020 // membrane // inferred from electronic annotation /// 0016021 // integral to membrane // inferred from electronic annotation	---	---	gb:BE571790 /DB_XREF=gi:9815510 /DB_XREF=601333779F1 /CLONE=IMAGE:3711186 /FEA=EST /CNT=99 /TID=Mm.4908.2 /TIER=Stack /STK=74 /UG=Mm.4908 /LL=12993 /UG_GENE=Csng /UG_TITLE=casein gamma	0.37455	0.43841	0.54068	0.78017	0.642	0.26746	0.2136	0.069555	0.29187	0.26432	0.22383
1433776_at	1	Lhfp	lipoma HMGIC fusion partner	---	0016020 // membrane // inferred from electronic annotation /// 0016021 // integral to membrane // inferred from electronic annotation	---	---	gb:AV149705 /DB_XREF=gi:16383120 /DB_XREF=AV149705 /CLONE=2810489O06 /FEA=EST /CNT=79 /TID=Mm.29465.1 /TIER=Stack /STK=61 /UG=Mm.29465 /LL=99563 /UG_GENE=AI194968 /UG_TITLE=expressed sequence AI194968	0.40797	0.55108	0.56297	0.81481	0.76792	0.37476	0.28094	0.14109	0.32057	0.30334	0.30198
1433779_at	1	Casc4	cancer susceptibility candidate 4	---	0016020 // membrane // inferred from electronic annotation /// 0016021 // integral to membrane // inferred from electronic annotation	---	---	gb:AV311104 /DB_XREF=gi:16394245 /DB_XREF=AV311104 /CLONE=5730594D13 /FEA=EST /CNT=82 /TID=Mm.31922.1 /TIER=Stack /STK=61 /UG=Mm.31922 /UG_TITLE=ESTs, Moderately similar to S12207 hypothetical protein (M.musculus)	0.62784	0.56357	0.80351	0.97431	1.1111	0.2008	0.18449	-0.030403	0.29821	0.28487	-0.030454
1434423_at	1	Gulp1	GULP, engulfment adaptor PTB domain containing 1	0006810 // transport // inferred from electronic annotation /// 0006869 // lipid transport // inferred from electronic annotation /// 0006909 // phagocytosis // inferred from electronic annotation /// 0006911 // phagocytosis, engulfment // not recorded /// 0006911 // phagocytosis, engulfment // inferred from electronic annotation /// 0006915 // apoptosis // inferred from electronic annotation	0005737 // cytoplasm // inferred from electronic annotation	0005515 // protein binding // not recorded /// 0005515 // protein binding // inferred from electronic annotation	---	gb:BB138485 /DB_XREF=gi:16266973 /DB_XREF=BB138485 /CLONE=9830148A07 /FEA=EST /CNT=36 /TID=Mm.23568.1 /TIER=Stack /STK=33 /UG=Mm.23568 /UG_TITLE=ESTs	0.65454	0.81995	0.60022	0.7194	1.0436	0.1877	0.028728	0.033631	0.071365	0.10396	0.066844
1434436_at	1	Morc4	microrchidia 4	---	---	0005524 // ATP binding // inferred from electronic annotation /// 0008270 // zinc ion binding // inferred from electronic annotation /// 0046872 // metal ion binding // inferred from electronic annotation	---	gb:AV036158 /DB_XREF=gi:16356612 /DB_XREF=AV036158 /CLONE=1600017G11 /FEA=EST /CNT=61 /TID=Mm.2917.1 /TIER=Stack /STK=32 /UG=Mm.2917 /UG_TITLE=ESTs	0.62105	0.6565	0.54632	1.0155	0.77236	0.067815	0.26333	-0.016133	0.39397	0.25555	0.12448
1435468_at	1	B3gnt9	UDP-GlcNAc:betaGal beta-1,3-N-acetylglucosaminyltransferase 9	0006486 // protein amino acid glycosylation // inferred from electronic annotation	0005794 // Golgi apparatus // inferred from electronic annotation /// 0016020 // membrane // inferred from electronic annotation /// 0016021 // integral to membrane // inferred from electronic annotation	0008378 // galactosyltransferase activity // inferred from electronic annotation /// 0016740 // transferase activity // inferred from electronic annotation /// 0016757 // transferase activity, transferring glycosyl groups // inferred from electronic annotation	---	gb:BB547181 /DB_XREF=gi:16447538 /DB_XREF=BB547181 /CLONE=E130315P17 /FEA=EST /CNT=24 /TID=Mm.27186.2 /TIER=Stack /STK=16 /UG=Mm.27186 /UG_TITLE=Mus musculus, Similar to CG7083 gene product, clone MGC:6480 IMAGE:2646515, mRNA, complete cds	0.54569	0.65182	0.5154	0.97765	0.83943	0.17983	0.2789	0.05649	0.39438	0.30514	0.33672
1435514_at	1	Lztfl1	leucine zipper transcription factor-like 1	---	---	---	---	gb:BB700884 /DB_XREF=gi:16049708 /DB_XREF=BB700884 /CLONE=7420424L21 /FEA=EST /CNT=17 /TID=Mm.39928.2 /TIER=Stack /STK=16 /UG=Mm.39928 /LL=74508 /UG_GENE=6130400H19Rik /UG_TITLE=RIKEN cDNA 6130400H19 gene	0.3869	0.36121	0.78659	1.0375	0.78563	-0.21916	0.12065	-0.067912	0.35841	0.085555	0.284
1435644_at	1	Sh3pxd2b	SH3 and PX domains 2B	0007154 // cell communication // inferred from electronic annotation /// 0030154 // cell differentiation // inferred from electronic annotation /// 0045600 // positive regulation of fat cell differentiation // inferred from mutant phenotype	0005737 // cytoplasm // inferred from direct assay /// 0005737 // cytoplasm // inferred from electronic annotation	0005515 // protein binding // inferred from electronic annotation /// 0010314 // phosphatidylinositol-5-phosphate binding // inferred from direct assay /// 0032266 // phosphatidylinositol 3-phosphate binding // inferred from mutant phenotype /// 0035091 // phosphoinositide binding // inferred from electronic annotation /// 0042169 // SH2 domain binding // inferred from direct assay /// 0070273 //…	---	gb:BM234433 /DB_XREF=gi:17869703 /DB_XREF=K0349H11-3 /CLONE=K0349H11 /FEA=EST /CNT=44 /TID=Mm.212573.1 /TIER=Stack /STK=14 /UG=Mm.212573 /UG_TITLE=ESTs, Weakly similar to NCF1 MOUSE NEUTROPHIL CYTOSOL FACTOR 1 (M.musculus)	0.36139	0.49681	0.52915	0.97326	0.8431	0.10772	0.19805	0.1964	0.27994	0.31939	0.19737
1435727_s_at	1	Lima1	LIM domain and actin binding 1	0030835 // negative regulation of actin filament depolymerization // inferred from sequence or structural similarity /// 0031529 // ruffle organization // inferred from sequence or structural similarity /// 0051017 // actin filament bundle formation // inferred from sequence or structural similarity	0001725 // stress fiber // inferred from sequence or structural similarity /// 0005737 // cytoplasm // inferred from electronic annotation /// 0005856 // cytoskeleton // inferred from electronic annotation /// 0005925 // focal adhesion // inferred from sequence or structural similarity /// 0015629 // actin cytoskeleton // inferred from direct assay	0003779 // actin binding // inferred from electronic annotation /// 0003785 // actin monomer binding // inferred from sequence or structural similarity /// 0008270 // zinc ion binding // inferred from electronic annotation /// 0046872 // metal ion binding // inferred from electronic annotation /// 0051015 // actin filament binding // inferred from sequence or structural similarity	---	gb:C81400 /DB_XREF=gi:2521730 /DB_XREF=C81400 /CLONE=J0098G01 /FEA=EST /CNT=14 /TID=Mm.196552.1 /TIER=Stack /STK=14 /UG=Mm.196552 /LL=52571 /UG_GENE=D15Ertd366e /UG_TITLE=DNA segment, Chr 15, ERATO Doi 366, expressed	0.59535	0.67704	0.59137	0.9371	0.81359	0.21046	0.22161	0.034231	0.44814	0.040265	0.29291
1436546_at	1	Lix1l	Lix1-like	---	---	---	---	gb:BM502719 /DB_XREF=gi:18663951 /DB_XREF=ii41g05.x1 /CLONE=IMAGE:5944496 /FEA=EST /CNT=18 /TID=Mm.88628.1 /TIER=Stack /STK=8 /UG=Mm.88628 /UG_TITLE=ESTs, Weakly similar to JAK3 MOUSE TYROSINE-PROTEIN KINASE JAK3 (M.musculus)	0.42432	0.70977	0.62197	1.0409	0.97177	0.34231	0.41985	0.070369	0.34945	0.32397	0.47325
1437065_at	1	Zbtb20	zinc finger and BTB domain containing 20	0006350 // transcription // inferred from electronic annotation /// 0045449 // regulation of transcription // inferred from electronic annotation	0005622 // intracellular // inferred from electronic annotation /// 0005634 // nucleus // inferred from direct assay /// 0005634 // nucleus // inferred from electronic annotation	0003676 // nucleic acid binding // inferred from electronic annotation /// 0003677 // DNA binding // inferred from direct assay /// 0003677 // DNA binding // inferred from electronic annotation /// 0005515 // protein binding // inferred from electronic annotation /// 0008270 // zinc ion binding // inferred from electronic annotation /// 0046872 // metal ion binding // inferred from electronic ann…	---	gb:BF730713 /DB_XREF=gi:12048577 /DB_XREF=mab68c03.x1 /CLONE=IMAGE:3975532 /FEA=EST /CNT=65 /TID=Mm.31375.1 /TIER=Stack /STK=27 /UG=Mm.31375 /UG_TITLE=ESTs	0.46003	0.58166	0.65466	0.86466	1.0797	0.13299	0.42692	0.047919	0.36514	0.09958	0.22992
1437066_at	1	Zbtb20	zinc finger and BTB domain containing 20	0006350 // transcription // inferred from electronic annotation /// 0045449 // regulation of transcription // inferred from electronic annotation	0005622 // intracellular // inferred from electronic annotation /// 0005634 // nucleus // inferred from direct assay /// 0005634 // nucleus // inferred from electronic annotation	0003676 // nucleic acid binding // inferred from electronic annotation /// 0003677 // DNA binding // inferred from direct assay /// 0003677 // DNA binding // inferred from electronic annotation /// 0005515 // protein binding // inferred from electronic annotation /// 0008270 // zinc ion binding // inferred from electronic annotation /// 0046872 // metal ion binding // inferred from electronic ann…	---	gb:BQ174376 /DB_XREF=gi:20349867 /DB_XREF=UI-M-DJ2-bvx-n-02-0-UI.s1 /CLONE=UI-M-DJ2-bvx-n-02-0-UI /FEA=EST /CNT=65 /TID=Mm.31375.1 /TIER=Stack /STK=16 /UG=Mm.31375 /UG_TITLE=ESTs	0.1929	0.40889	0.66153	0.97098	0.93085	0.36318	0.37444	0.34776	0.18985	0.13934	-0.17194
1437598_at	1	Zbtb20	zinc finger and BTB domain containing 20	0006350 // transcription // inferred from electronic annotation /// 0045449 // regulation of transcription // inferred from electronic annotation	0005622 // intracellular // inferred from electronic annotation /// 0005634 // nucleus // inferred from direct assay	0003676 // nucleic acid binding // inferred from electronic annotation /// 0003677 // DNA binding // inferred from direct assay /// 0005515 // protein binding // inferred from electronic annotation /// 0008270 // zinc ion binding // inferred from electronic annotation /// 0046872 // metal ion binding // inferred from electronic annotation	---	gb:BB308952 /DB_XREF=gi:16402457 /DB_XREF=BB308952 /CLONE=B230308F23 /FEA=EST /CNT=17 /TID=Mm.63382.1 /TIER=Stack /STK=16 /UG=Mm.63382 /UG_TITLE=ESTs	0.26244	0.47549	0.93279	1.1584	1.3396	0.19382	0.28596	0.091041	0.22698	0.30013	-0.2007
1441894_s_at	1	Grasp	GRP1 (general receptor for phosphoinositides 1)-associated scaffold protein	0006886 // intracellular protein transport // not recorded /// 0007165 // signal transduction // inferred from physical interaction /// 0008104 // protein localization // inferred from electronic annotation	0005641 // nuclear envelope lumen // not recorded /// 0005737 // cytoplasm // not recorded /// 0005737 // cytoplasm // inferred from electronic annotation /// 0005886 // plasma membrane // inferred from direct assay /// 0005886 // plasma membrane // not recorded /// 0005886 // plasma membrane // inferred from electronic annotation /// 0016020 // membrane // inferred from electronic annotation	0005515 // protein binding // inferred from physical interaction /// 0005515 // protein binding // not recorded /// 0005515 // protein binding // inferred from electronic annotation /// 0030165 // PDZ domain binding // inferred from electronic annotation /// 0030306 // ADP-ribosylation factor binding // inferred from electronic annotation	---	gb:BB071890 /DB_XREF=gi:8581888 /DB_XREF=BB071890 /CLONE=8030499N14 /FEA=EST /CNT=4 /TID=Mm.133295.1 /TIER=ConsEnd /STK=4 /UG=Mm.133295 /UG_TITLE=ESTs	0.48586	0.45593	0.73732	0.77653	0.81414	0.39358	0.4169	0.26476	0.45143	0.17805	-0.029661
1441904_x_at	1	Fam114a1	family with sequence similarity 114, member A1	---	0005737 // cytoplasm // inferred from electronic annotation	---	---	gb:AV364676 /DB_XREF=gi:6412323 /DB_XREF=AV364676 /CLONE=8430401C01 /FEA=EST /CNT=4 /TID=Mm.59466.1 /TIER=ConsEnd /STK=4 /UG=Mm.59466 /UG_TITLE=ESTs	0.31665	0.59885	0.5055	0.86116	0.95406	0.16601	0.11433	0.088141	0.20826	0.13798	0.04508
1442740_at	1	Prdm5	PR domain containing 5	0000278 // mitotic cell cycle // inferred from electronic annotation /// 0000278 // mitotic cell cycle // inferred from sequence or structural similarity /// 0006350 // transcription // inferred from electronic annotation /// 0016568 // chromatin modification // inferred from electronic annotation /// 0016575 // histone deacetylation // inferred from electronic annotation /// 0016575 // histone d…	0005622 // intracellular // inferred from electronic annotation /// 0005634 // nucleus // inferred from electronic annotation /// 0005634 // nucleus // inferred from sequence or structural similarity	0003676 // nucleic acid binding // inferred from electronic annotation /// 0003677 // DNA binding // inferred from electronic annotation /// 0008270 // zinc ion binding // inferred from electronic annotation /// 0010843 // promoter binding // inferred from electronic annotation /// 0010843 // promoter binding // inferred from sequence or structural similarity /// 0016566 // specific transcription…	---	gb:BM219213 /DB_XREF=gi:17778961 /DB_XREF=C0921G04-3 /CLONE=C0921G04 /FEA=EST /CNT=4 /TID=Mm.218438.1 /TIER=ConsEnd /STK=3 /UG=Mm.218438 /UG_TITLE=ESTs, Moderately similar to RIKEN cDNA 5730493B19 (Mus musculus) (M.musculus)	0.49956	0.40777	0.59745	0.90553	0.95563	-0.13246	0.039338	-0.20255	0.18535	0.19638	-0.0092047
1444043_at	1	---	---	---	---	---	---	gb:AI173484 /DB_XREF=gi:3719626 /DB_XREF=ue91f07.x1 /CLONE=IMAGE:1498501 /FEA=EST /CNT=6 /TID=Mm.26631.1 /TIER=ConsEnd /STK=2 /UG=Mm.26631 /UG_TITLE=ESTs	0.60564	0.37099	0.55117	0.68709	0.76517	0.24296	0.18687	0.18276	0.4042	0.041854	0.047062
1444302_at	1	Glt8d4 /// LOC100048436	glycosyltransferase 8 domain containing 4 /// similar to CDNA sequence BC049816	---	0016020 // membrane // inferred from electronic annotation /// 0016021 // integral to membrane // inferred from electronic annotation	0016740 // transferase activity // inferred from electronic annotation /// 0016757 // transferase activity, transferring glycosyl groups // inferred from electronic annotation	---	gb:AV278332 /DB_XREF=gi:16391147 /DB_XREF=AV278332 /CLONE=4933401F19 /FEA=EST /CNT=5 /TID=Mm.61160.1 /TIER=ConsEnd /STK=2 /UG=Mm.61160 /UG_TITLE=ESTs, Weakly similar to PRP2 RAT ACIDIC PROLINE-RICH PROTEIN PRP25 PRECURSOR (R.norvegicus)	0.43299	0.53755	0.55697	0.84588	1.0053	0.074877	0.10837	-0.0038128	0.32912	0.29765	0.20136
1445758_at	1	---	---	---	---	---	---	gb:BG076276 /DB_XREF=gi:12558845 /DB_XREF=H3157G06-3 /CLONE=H3157G06 /FEA=EST /CNT=3 /TID=Mm.197308.1 /TIER=ConsEnd /STK=2 /UG=Mm.197308 /UG_TITLE=ESTs	0.30922	0.39842	0.69096	0.97269	1.05	0.013884	0.19028	0.12598	0.14621	0.11491	0.041593
1447602_x_at	1	Sulf2	sulfatase 2	0006350 // transcription // inferred from electronic annotation /// 0006355 // regulation of transcription, DNA-dependent // inferred from electronic annotation /// 0006790 // sulfur metabolic process // not recorded /// 0007165 // signal transduction // inferred from electronic annotation /// 0008152 // metabolic process // inferred from electronic annotation /// 0033148 // positive regulation o…	0005615 // extracellular space // not recorded /// 0005634 // nucleus // inferred from electronic annotation /// 0005634 // nucleus // inferred from direct assay /// 0005737 // cytoplasm // inferred from electronic annotation /// 0005783 // endoplasmic reticulum // inferred from electronic annotation /// 0005794 // Golgi apparatus // inferred from electronic annotation /// 0005795 // Golgi stack …	0003677 // DNA binding // inferred from electronic annotation /// 0003682 // chromatin binding // inferred from direct assay /// 0003713 // transcription coactivator activity // inferred from electronic annotation /// 0003824 // catalytic activity // inferred from electronic annotation /// 0004065 // arylsulfatase activity // not recorded /// 0004065 // arylsulfatase activity // inferred from ele…	---	gb:AU020235 /DB_XREF=gi:3375819 /DB_XREF=AU020235 /CLONE=J0529E07 /FEA=EST /CNT=2 /TID=Mm.202858.1 /TIER=ConsEnd /STK=2 /UG=Mm.202858 /LL=99203 /UG_GENE=AU020235 /UG_TITLE=expressed sequence AU020235	0.47897	0.94521	0.51003	0.76093	0.96005	0.47114	0.39965	0.29177	0.20202	0.20464	0.25099
1447643_x_at	1	Snai2	snail homolog 2 (Drosophila)	0006350 // transcription // inferred from electronic annotation /// 0007275 // multicellular organismal development // inferred from electronic annotation /// 0009314 // response to radiation // inferred from direct assay /// 0009314 // response to radiation // inferred from mutant phenotype /// 0045449 // regulation of transcription // inferred from electronic annotation /// 0045884 // regulatio…	0005622 // intracellular // inferred from electronic annotation /// 0005634 // nucleus // inferred from direct assay /// 0005634 // nucleus // inferred from electronic annotation	0003676 // nucleic acid binding // inferred from electronic annotation /// 0003677 // DNA binding // inferred from electronic annotation /// 0008270 // zinc ion binding // inferred from electronic annotation /// 0046872 // metal ion binding // inferred from electronic annotation	---	gb:BB040443 /DB_XREF=gi:8446829 /DB_XREF=BB040443 /CLONE=6030449D22 /FEA=EST /CNT=2 /TID=Mm.111780.1 /TIER=ConsEnd /STK=2 /UG=Mm.111780 /UG_TITLE=ESTs	0.443	0.051128	0.57424	1.0829	1.1802	0.41419	0.32312	0.06123	0.54599	0.39479	0.18487
1448648_at	1	Fam114a1	family with sequence similarity 114, member A1	---	0005737 // cytoplasm // inferred from electronic annotation	---	---	gb:NM_026667.1 /DB_XREF=gi:13386149 /GEN=9130005N14Rik /FEA=FLmRNA /CNT=110 /TID=Mm.87593.1 /TIER=FL /STK=5 /UG=Mm.87593 /LL=68303 /DEF=Mus musculus RIKEN cDNA 9130005N14 gene (9130005N14Rik), mRNA. /PROD=RIKEN cDNA 9130005N14 /FL=gb:NM_026667.1 gb:BC027235.1	0.55489	0.62598	0.58906	0.98543	1.0482	-0.095931	0.1495	0.058243	0.38631	0.25966	0.093644
1448901_at	1	Cpxm1	carboxypeptidase X 1 (M14 family)	0006508 // proteolysis // inferred from direct assay /// 0006508 // proteolysis // inferred from electronic annotation /// 0007155 // cell adhesion // inferred from electronic annotation	0005576 // extracellular region // inferred from electronic annotation /// 0005615 // extracellular space // inferred from direct assay	0004180 // carboxypeptidase activity // inferred from direct assay /// 0004180 // carboxypeptidase activity // inferred from electronic annotation /// 0004181 // metallocarboxypeptidase activity // inferred from electronic annotation /// 0008233 // peptidase activity // inferred from electronic annotation /// 0008237 // metallopeptidase activity // inferred from electronic annotation /// 0008270 …	---	gb:NM_019696.1 /DB_XREF=gi:9789916 /GEN=Cpxm1 /FEA=FLmRNA /CNT=58 /TID=Mm.22224.1 /TIER=FL+Stack /STK=33 /UG=Mm.22224 /LL=56264 /DEF=Mus musculus carboxypeptidase X 1 (M14 family) (Cpxm1), mRNA. /PROD=carboxypeptidase X 1 (M14 family) /FL=gb:AF077738.1 gb:NM_019696.1 gb:BC003713.1	0.54812	0.70992	0.80564	0.75777	1.0129	0.38218	0.32083	0.18494	0.37202	0.41836	0.45457
1449037_at	1	Crem	cAMP responsive element modulator	0006006 // glucose metabolic process // inferred from electronic annotation /// 0006350 // transcription // inferred from electronic annotation /// 0006355 // regulation of transcription, DNA-dependent // inferred from electronic annotation /// 0006631 // fatty acid metabolic process // inferred from electronic annotation /// 0006687 // glycosphingolipid metabolic process // inferred from mutant …	0005634 // nucleus // inferred from direct assay /// 0005634 // nucleus // inferred from electronic annotation /// 0005667 // transcription factor complex // inferred from direct assay	0003677 // DNA binding // inferred from direct assay /// 0003677 // DNA binding // inferred from electronic annotation /// 0003700 // transcription factor activity // inferred from electronic annotation /// 0005515 // protein binding // inferred from electronic annotation /// 0043565 // sequence-specific DNA binding // inferred from electronic annotation /// 0046983 // protein dimerization activi…	---	gb:AI467599 /DB_XREF=gi:4320936 /DB_XREF=ve39h10.x1 /CLONE=IMAGE:820579 /FEA=FLmRNA /CNT=101 /TID=Mm.5244.1 /TIER=Stack /STK=31 /UG=Mm.5244 /LL=12916 /UG_GENE=Crem /UG_TITLE=cAMP responsive element modulator /FL=gb:NM_013498.1 gb:M60285.1	0.186	0.48056	0.63297	1.1067	0.67194	-0.042486	0.08148	0.034019	0.25015	0.13522	0.20406
1449350_at	1	Osr1	odd-skipped related 1 (Drosophila)	0001656 // metanephros development // inferred from mutant phenotype /// 0007507 // heart development // inferred from mutant phenotype /// 0008406 // gonad development // inferred from mutant phenotype /// 0048389 // intermediate mesoderm development // inferred from mutant phenotype	0005622 // intracellular // inferred from electronic annotation /// 0005634 // nucleus // inferred from electronic annotation /// 0005730 // nucleolus // inferred from electronic annotation	0003676 // nucleic acid binding // inferred from electronic annotation /// 0008270 // zinc ion binding // inferred from electronic annotation /// 0046872 // metal ion binding // inferred from electronic annotation	---	gb:NM_011859.1 /DB_XREF=gi:6754927 /GEN=Osr1 /FEA=FLmRNA /CNT=37 /TID=Mm.45055.1 /TIER=FL+Stack /STK=13 /UG=Mm.45055 /LL=23967 /DEF=Mus musculus odd-skipped related 1 (Drosophila) (Osr1), mRNA. /PROD=odd-skipped related 1 (Drosophila) /FL=gb:AF117814.1 gb:NM_011859.1	0.48571	0.82926	0.57807	0.95411	0.80588	0.14752	0.13747	0.069253	0.3914	0.15015	0.10278
1450251_a_at	1	Lnx1	ligand of numb-protein X 1	0006511 // ubiquitin-dependent protein catabolic process // inferred from direct assay /// 0019941 // modification-dependent protein catabolic process // inferred from electronic annotation /// 0042787 // protein ubiquitination during ubiquitin-dependent protein catabolic process // inferred from direct assay /// 0051260 // protein homooligomerization // inferred from direct assay	0005737 // cytoplasm // inferred from direct assay /// 0005737 // cytoplasm // inferred from electronic annotation	0004842 // ubiquitin-protein ligase activity // inferred from direct assay /// 0005515 // protein binding // inferred from physical interaction /// 0005515 // protein binding // inferred from electronic annotation /// 0008270 // zinc ion binding // inferred from electronic annotation /// 0016874 // ligase activity // inferred from electronic annotation /// 0030165 // PDZ domain binding // inferre…	---	gb:NM_010727.1 /DB_XREF=gi:6754565 /GEN=Lnx1 /FEA=FLmRNA /CNT=9 /TID=Mm.10179.1 /TIER=FL /STK=2 /UG=Mm.10179 /LL=16924 /DEF=Mus musculus ligand of numb-protein X 1 (Lnx1), mRNA. /PROD=ligand of numb-protein X 1 /FL=gb:AF034746.1 gb:NM_010727.1	0.34926	0.61398	0.53846	0.96424	0.55171	0.12212	0.1298	0.107	0.29725	0.29996	0.27159
1451264_at	1	Frmd6	FERM domain containing 6	---	0005737 // cytoplasm // inferred from electronic annotation /// 0005739 // mitochondrion // inferred from electronic annotation /// 0005856 // cytoskeleton // inferred from electronic annotation /// 0005886 // plasma membrane // inferred from electronic annotation /// 0016020 // membrane // inferred from electronic annotation	0005488 // binding // inferred from electronic annotation	---	gb:BC019939.1 /DB_XREF=gi:18043320 /FEA=FLmRNA /CNT=120 /TID=Mm.2962.1 /TIER=FL+Stack /STK=48 /UG=Mm.2962 /LL=105012 /UG_GENE=2610019M19Rik /DEF=Mus musculus, RIKEN cDNA 2610019M19 gene, clone MGC:28301 IMAGE:4012649, mRNA, complete cds. /PROD=RIKEN cDNA 2610019M19 gene /FL=gb:BC019939.1	0.36509	0.56352	0.78659	0.77283	0.90808	0.38546	0.47186	0.26596	0.36471	0.37579	0.44273
1451270_at	1	Dusp18	dual specificity phosphatase 18	0006470 // protein amino acid dephosphorylation // inferred from electronic annotation /// 0006612 // protein targeting to membrane // inferred from sequence or structural similarity /// 0006626 // protein targeting to mitochondrion // inferred from sequence or structural similarity /// 0016311 // dephosphorylation // inferred from electronic annotation /// 0033365 // protein localization in orga…	0005634 // nucleus // inferred from electronic annotation /// 0005737 // cytoplasm // inferred from sequence or structural similarity /// 0005737 // cytoplasm // inferred from electronic annotation /// 0005739 // mitochondrion // inferred from sequence or structural similarity /// 0005743 // mitochondrial inner membrane // inferred from sequence or structural similarity /// 0005758 // mitochondri…	0004721 // phosphoprotein phosphatase activity // inferred from electronic annotation /// 0004725 // protein tyrosine phosphatase activity // inferred from electronic annotation /// 0008138 // protein tyrosine/serine/threonine phosphatase activity // inferred from electronic annotation /// 0016787 // hydrolase activity // inferred from electronic annotation /// 0016791 // phosphatase activity // …	---	gb:BC020036.1 /DB_XREF=gi:18043292 /FEA=FLmRNA /CNT=73 /TID=Mm.32588.1 /TIER=FL+Stack /STK=47 /UG=Mm.32588 /LL=75219 /UG_GENE=4930527G07Rik /DEF=Mus musculus, clone MGC:28218 IMAGE:3990751, mRNA, complete cds. /PROD=Unknown (protein for MGC:28218) /FL=gb:BC020036.1	0.47946	0.72343	0.5195	0.83165	0.64535	0.25916	0.015499	0.16153	0.31456	0.25069	0.17418
1451716_at	1	Mafb	v-maf musculoaponeurotic fibrosarcoma oncogene family, protein B (avian)	0006350 // transcription // inferred from electronic annotation /// 0006355 // regulation of transcription, DNA-dependent // inferred from electronic annotation /// 0006357 // regulation of transcription from RNA polymerase II promoter // inferred from direct assay /// 0007379 // segment specification // inferred from mutant phenotype /// 0007585 // respiratory gaseous exchange // inferred from m…	0005634 // nucleus // inferred from direct assay /// 0005634 // nucleus // inferred from electronic annotation /// 0005667 // transcription factor complex // inferred from direct assay /// 0005737 // cytoplasm // inferred from electronic annotation	0003677 // DNA binding // inferred from direct assay /// 0003677 // DNA binding // inferred from electronic annotation /// 0003700 // transcription factor activity // inferred from electronic annotation /// 0005515 // protein binding // inferred from physical interaction /// 0008134 // transcription factor binding // inferred from electronic annotation /// 0043565 // sequence-specific DNA binding…	---	gb:AW412521 /DB_XREF=gi:6938339 /DB_XREF=uq41h10.x1 /CLONE=IMAGE:2812003 /FEA=FLmRNA /CNT=162 /TID=Mm.67919.1 /TIER=Stack /STK=11 /UG=Mm.67919 /LL=16658 /UG_GENE=Mafb /UG_TITLE=v-maf musculoaponeurotic fibrosarcoma oncogene family, protein B (avian) /FL=gb:L36435.1 gb:BC016434.1	0.39089	0.61086	0.60148	1.1024	0.94086	0.28573	0.57254	0.29211	0.1188	0.04609	-0.18538
1452752_at	1	Lepre1	leprecan 1	0016049 // cell growth // inferred from direct assay /// 0055114 // oxidation reduction // inferred from electronic annotation	0005576 // extracellular region // inferred from electronic annotation /// 0005578 // proteinaceous extracellular matrix // inferred from electronic annotation /// 0005634 // nucleus // inferred from direct assay /// 0005737 // cytoplasm // inferred from direct assay /// 0005783 // endoplasmic reticulum // inferred from electronic annotation /// 0005886 // plasma membrane // traceable author stat…	0005488 // binding // inferred from electronic annotation /// 0005506 // iron ion binding // inferred from electronic annotation /// 0016491 // oxidoreductase activity // inferred from electronic annotation /// 0016702 // oxidoreductase activity, acting on single donors with incorporation of molecular oxygen, incorporation of two atoms of oxygen // inferred from electronic annotation /// 0016705 …	---	gb:BE283629 /DB_XREF=gi:9160008 /DB_XREF=601102881F1 /CLONE=IMAGE:3495069 /FEA=mRNA /CNT=160 /TID=Mm.27961.3 /TIER=ConsEnd /STK=0 /UG=Mm.27961 /LL=56401 /UG_GENE=Lepre1 /UG_TITLE=leprecan 1	0.34202	0.49846	0.53163	0.91394	0.91517	-0.023038	0.14994	-0.082198	0.13128	0.24208	0.019955
1452762_at	1	8430436O14Rik	RIKEN cDNA 8430436O14 gene	---	---	---	---	gb:AK018466.1 /DB_XREF=gi:12858179 /FEA=mRNA /CNT=65 /TID=Mm.99916.1 /TIER=Stack /STK=48 /UG=Mm.99916 /LL=71506 /UG_GENE=8430436O14Rik /UG_TITLE=RIKEN cDNA 8430436O14 gene /DEF=Mus musculus 16 days embryo lung cDNA, RIKEN full-length enriched library, clone:8430436O14:unclassifiable transcript, full insert sequence.	0.5109	0.40732	0.53892	0.945	0.85816	0.035946	0.19795	-0.061162	0.32089	0.2454	0.19328
1454677_at	1	Timp2	tissue inhibitor of metalloproteinase 2	0008285 // negative regulation of cell proliferation // inferred from direct assay /// 0030814 // regulation of cAMP metabolic process // inferred from direct assay /// 0043408 // regulation of MAPKKK cascade // inferred from direct assay /// 0045664 // regulation of neuron differentiation // inferred from direct assay /// 0045664 // regulation of neuron differentiation // inferred from mutant ph…	0005576 // extracellular region // inferred from electronic annotation /// 0005578 // proteinaceous extracellular matrix // inferred from electronic annotation /// 0005604 // basement membrane // inferred from direct assay /// 0009986 // cell surface // inferred from direct assay	0004857 // enzyme inhibitor activity // inferred from electronic annotation /// 0005178 // integrin binding // inferred from direct assay /// 0005515 // protein binding // inferred from electronic annotation /// 0008047 // enzyme activator activity // inferred from mutant phenotype /// 0008191 // metalloendopeptidase inhibitor activity // inferred from mutant phenotype /// 0008191 // metalloendop…	Matrix_Metalloproteinases // GenMAPP	gb:BF168458 /DB_XREF=gi:11048810 /DB_XREF=601776050F1 /CLONE=IMAGE:4017732 /FEA=EST /CNT=172 /TID=Mm.206505.1 /TIER=Stack /STK=75 /UG=Mm.206505 /LL=52894 /UG_GENE=D11Bwg1104e /UG_TITLE=DNA segment, Chr 11, Brigham & Womens Genetics 1104 expressed	0.56384	0.90979	0.56671	0.92772	1.0132	0.4713	0.41466	0.323	0.55056	0.30907	0.55629
1455096_at	1	Flrt2	fibronectin leucine rich transmembrane protein 2	---	0016021 // integral to membrane // inferred from electronic annotation	0005515 // protein binding // inferred from electronic annotation	---	gb:AW555664 /DB_XREF=gi:7201087 /DB_XREF=L0257E09-3 /CLONE=L0257E09 /FEA=EST /CNT=29 /TID=Mm.100844.1 /TIER=Stack /STK=25 /UG=Mm.100844 /UG_TITLE=ESTs	0.45847	0.38569	0.67514	0.8436	0.85801	0.2088	0.25003	-0.007282	0.42783	0.34673	0.24235
1455180_at	1	Gcom1	GRINL1A complex locus	---	---	---	---	gb:BG063148 /DB_XREF=gi:12545711 /DB_XREF=H3003F04-3 /CLONE=H3003F04 /FEA=EST /CNT=32 /TID=Mm.27585.1 /TIER=Stack /STK=21 /UG=Mm.27585 /LL=102371 /UG_GENE=AA407270 /UG_TITLE=expressed sequence AA407270	0.62601	0.50634	0.55692	0.74339	0.61049	-0.26349	0.21222	-0.018476	0.43347	0.093658	0.2261
1456067_at	1	Gli3	GLI-Kruppel family member GLI3	0001656 // metanephros development // inferred from genetic interaction /// 0001658 // branching involved in ureteric bud morphogenesis // inferred from genetic interaction /// 0001701 // in utero embryonic development // inferred from mutant phenotype /// 0001822 // kidney development // inferred from genetic interaction /// 0006350 // transcription // inferred from electronic annotation /// 000…	0005622 // intracellular // inferred from electronic annotation /// 0005634 // nucleus // inferred from direct assay /// 0005634 // nucleus // not recorded /// 0005634 // nucleus // inferred from electronic annotation /// 0005730 // nucleolus // inferred from electronic annotation /// 0005737 // cytoplasm // inferred from direct assay /// 0005929 // cilium // not recorded /// 0005929 // cilium //…	0003676 // nucleic acid binding // inferred from electronic annotation /// 0003677 // DNA binding // inferred from electronic annotation /// 0003682 // chromatin binding // inferred from genetic interaction /// 0005515 // protein binding // inferred from physical interaction /// 0005515 // protein binding // inferred from electronic annotation /// 0008270 // zinc ion binding // inferred from elec…	---	gb:AW546010 /DB_XREF=gi:7191283 /DB_XREF=L0001A07-3 /CLONE=L0001A07 /FEA=EST /CNT=35 /TID=Mm.36771.1 /TIER=Stack /STK=17 /UG=Mm.36771 /LL=105293 /UG_GENE=AU023367 /UG_TITLE=expressed sequence AU023367	0.46813	0.54839	0.55836	0.90333	0.70195	0.18541	0.31667	0.11122	0.42072	0.09588	0.032528
1458057_at	1	---	---	---	---	---	---	gb:BB343142 /DB_XREF=gi:16404761 /DB_XREF=BB343142 /CLONE=B930042J22 /FEA=EST /CNT=3 /TID=Mm.215794.1 /TIER=ConsEnd /STK=3 /UG=Mm.215794 /UG_TITLE=ESTs	0.43552	0.22007	0.53578	0.85105	0.86434	0.049002	0.084678	0.23785	0.28701	0.3133	0.067201
1460559_at	1	Kank2	KN motif and ankyrin repeat domains 2	0051497 // negative regulation of stress fiber formation // not recorded	0005737 // cytoplasm // not recorded	---	---	gb:BB038765 /DB_XREF=gi:15403765 /DB_XREF=BB038765 /CLONE=6030407H20 /FEA=EST /CNT=48 /TID=Mm.21917.1 /TIER=Stack /STK=41 /UG=Mm.21917 /LL=102548 /UG_GENE=AI504612 /UG_TITLE=expressed sequence AI504612	0.40751	0.39192	0.5915	0.68947	0.72937	0.27157	0.49531	0.12387	0.38716	0.31004	0.20184
1415877_at	2	Dpysl3	dihydropyrimidinase-like 3	0007399 // nervous system development // inferred from direct assay	0005737 // cytoplasm // inferred from electronic annotation /// 0030426 // growth cone // inferred from electronic annotation /// 0042995 // cell projection // inferred from electronic annotation	0016787 // hydrolase activity // inferred from electronic annotation /// 0016810 // hydrolase activity, acting on carbon-nitrogen (but not peptide) bonds // inferred from electronic annotation	---	gb:NM_009468.1 /DB_XREF=gi:6681218 /GEN=Dpysl3 /FEA=FLmRNA /CNT=262 /TID=Mm.180905.1 /TIER=FL+Stack /STK=188 /UG=Mm.180905 /LL=22240 /DEF=Mus musculus dihydropyrimidinase-like 3 (Dpysl3), mRNA. /PROD=dihydropyrimidinase-like 3 /FL=gb:BC023003.1 gb:NM_009468.1	0.61838	0.80281	0.67124	1.1131	1.0607	0.14763	0.44983	0.24184	0.57015	0.32809	0.4093
1415943_at	2	Sdc1	syndecan 1	0001822 // kidney development // inferred from electronic annotation /// 0009636 // response to toxin // inferred from electronic annotation /// 0042060 // wound healing // inferred from electronic annotation /// 0042476 // odontogenesis // inferred from electronic annotation /// 0042542 // response to hydrogen peroxide // inferred from electronic annotation /// 0048627 // myoblast development //…	0001931 // uropod // inferred from electronic annotation /// 0005737 // cytoplasm // inferred from electronic annotation /// 0005925 // focal adhesion // inferred from electronic annotation /// 0009986 // cell surface // inferred from direct assay /// 0016020 // membrane // inferred from electronic annotation /// 0016021 // integral to membrane // inferred from electronic annotation /// 0043234 /…	0008022 // protein C-terminus binding // inferred from electronic annotation /// 0008092 // cytoskeletal protein binding // inferred from electronic annotation	---	gb:BC010560.1 /DB_XREF=gi:14714818 /FEA=FLmRNA /CNT=374 /TID=Mm.2580.1 /TIER=FL+Stack /STK=163 /UG=Mm.2580 /LL=20969 /UG_GENE=Sdc1 /DEF=Mus musculus, syndecan 1, clone MGC:5879 IMAGE:3501359, mRNA, complete cds. /PROD=syndecan 1 /FL=gb:BC010560.1 gb:NM_011519.1	0.73284	0.59427	0.78021	1.4311	1.0597	0.33965	0.48939	0.1229	0.48324	0.32669	0.41541
1416129_at	2	Errfi1	ERBB receptor feedback inhibitor 1	0031098 // stress-activated protein kinase signaling pathway // not recorded	0005737 // cytoplasm // inferred from electronic annotation /// 0005829 // cytosol // not recorded	0004872 // receptor activity // inferred from electronic annotation /// 0005515 // protein binding // inferred from physical interaction	---	gb:NM_133753.1 /DB_XREF=gi:19526961 /GEN=1300002F13Rik /FEA=FLmRNA /CNT=270 /TID=Mm.21679.1 /TIER=FL+Stack /STK=123 /UG=Mm.21679 /LL=74155 /DEF=Mus musculus RIKEN cDNA 1300002F13 gene (1300002F13Rik), mRNA. /PROD=RIKEN cDNA 1300002F13 /FL=gb:BC005546.1 gb:NM_133753.1	0.38316	0.95243	0.95529	1.4122	0.75417	0.35137	0.55576	0.44178	-0.017539	0.18424	0.11104
1416405_at	2	Bgn	biglycan	0001974 // blood vessel remodeling // inferred from electronic annotation /// 0019800 // peptide cross-linking via chondroitin 4-sulfate glycosaminoglycan // inferred from direct assay	0005576 // extracellular region // inferred from electronic annotation /// 0005578 // proteinaceous extracellular matrix // inferred from electronic annotation /// 0009986 // cell surface // inferred from sequence or structural similarity /// 0009986 // cell surface // inferred from direct assay /// 0030133 // transport vesicle // inferred from electronic annotation /// 0031012 // extracellular m…	0005515 // protein binding // inferred from electronic annotation /// 0005539 // glycosaminoglycan binding // inferred from direct assay /// 0050840 // extracellular matrix binding // inferred from direct assay	---	gb:BC019502.1 /DB_XREF=gi:18044514 /FEA=FLmRNA /CNT=224 /TID=Mm.2608.1 /TIER=FL+Stack /STK=91 /UG=Mm.2608 /LL=12111 /UG_GENE=Bgn /DEF=Mus musculus, biglycan, clone MGC:28669 IMAGE:4237268, mRNA, complete cds. /PROD=biglycan /FL=gb:BC005452.1 gb:NM_007542.2 gb:L20276.1 gb:BC019502.1	0.44448	0.61593	0.73233	1.1897	1.1018	0.30673	0.46737	0.21639	0.59291	0.47909	0.33321
1417272_at	2	Fam114a1	family with sequence similarity 114, member A1	---	0005737 // cytoplasm // inferred from electronic annotation	---	---	gb:BC027235.1 /DB_XREF=gi:20072645 /FEA=FLmRNA /CNT=110 /TID=Mm.87593.1 /TIER=FL+Stack /STK=50 /UG=Mm.87593 /LL=68303 /UG_GENE=9130005N14Rik /DEF=Mus musculus, RIKEN cDNA 9130005N14 gene, clone MGC:28011 IMAGE:3603083, mRNA, complete cds. /PROD=RIKEN cDNA 9130005N14 gene /FL=gb:NM_026667.1 gb:BC027235.1	0.55559	0.60529	0.69052	1.0374	1.1363	0.24144	0.37113	0.12027	0.58879	0.34948	0.32106
1418446_at	2	Slc16a2	solute carrier family 16 (monocarboxylic acid transporters), member 2	0006810 // transport // inferred from electronic annotation /// 0009914 // hormone transport // inferred from electronic annotation /// 0055085 // transmembrane transport // inferred from electronic annotation	0005886 // plasma membrane // inferred from electronic annotation /// 0016020 // membrane // inferred from electronic annotation /// 0016021 // integral to membrane // inferred from electronic annotation	0015293 // symporter activity // inferred from electronic annotation /// 0015349 // thyroid hormone transmembrane transporter activity // inferred from electronic annotation	---	gb:AW105741 /DB_XREF=gi:6076477 /DB_XREF=um32a09.x1 /CLONE=IMAGE:2236216 /FEA=FLmRNA /CNT=93 /TID=Mm.5045.1 /TIER=Stack /STK=23 /UG=Mm.5045 /LL=20502 /UG_GENE=Slc16a2 /UG_TITLE=solute carrier family 16 (monocarboxylic acid transporters), member 2 /FL=gb:NM_009197.1 gb:AF045692.1	0.90513	0.971	0.54385	1.4204	1.0352	0.4299	0.48407	0.33895	0.44326	0.30527	0.41906
1420498_a_at	2	Dab2	disabled homolog 2 (Drosophila)	0000904 // cell morphogenesis involved in differentiation // inferred from mutant phenotype /// 0001701 // in utero embryonic development // inferred from mutant phenotype /// 0006898 // receptor-mediated endocytosis // inferred from physical interaction /// 0006907 // pinocytosis // inferred from mutant phenotype /// 0007588 // excretion // inferred from mutant phenotype /// 0030308 // negative …	0005905 // coated pit // inferred from electronic annotation /// 0016020 // membrane // inferred from electronic annotation /// 0030665 // clathrin coated vesicle membrane // inferred from electronic annotation /// 0031410 // cytoplasmic vesicle // inferred from electronic annotation	0005515 // protein binding // inferred from physical interaction /// 0005515 // protein binding // inferred from electronic annotation /// 0008022 // protein C-terminus binding // inferred from electronic annotation	---	gb:NM_023118.1 /DB_XREF=gi:12963488 /GEN=Dab2 /FEA=FLmRNA /CNT=61 /TID=Mm.34248.1 /TIER=FL /STK=4 /UG=Mm.34248 /LL=13132 /DEF=Mus musculus disabled homolog 2 (Drosophila) (Dab2), mRNA. /PROD=disabled homolog 2 (Drosophila) /FL=gb:U18869.1 gb:NM_023118.1	0.76262	0.9436	0.72214	1.0924	1.2447	0.27731	0.37369	0.21764	0.39839	0.3507	0.39596
1420924_at	2	Timp2	tissue inhibitor of metalloproteinase 2	0008285 // negative regulation of cell proliferation // inferred from direct assay /// 0030814 // regulation of cAMP metabolic process // inferred from direct assay /// 0043408 // regulation of MAPKKK cascade // inferred from direct assay /// 0045664 // regulation of neuron differentiation // inferred from direct assay /// 0045664 // regulation of neuron differentiation // inferred from mutant ph…	0005576 // extracellular region // inferred from electronic annotation /// 0005578 // proteinaceous extracellular matrix // inferred from electronic annotation /// 0005604 // basement membrane // inferred from direct assay /// 0009986 // cell surface // inferred from direct assay	0004857 // enzyme inhibitor activity // inferred from electronic annotation /// 0005178 // integrin binding // inferred from direct assay /// 0005515 // protein binding // inferred from electronic annotation /// 0008047 // enzyme activator activity // inferred from mutant phenotype /// 0008191 // metalloendopeptidase inhibitor activity // inferred from mutant phenotype /// 0008191 // metalloendop…	Matrix_Metalloproteinases // GenMAPP	gb:NM_011594.1 /DB_XREF=gi:6755790 /GEN=Timp2 /FEA=FLmRNA /CNT=152 /TID=Mm.181969.1 /TIER=FL /STK=2 /UG=Mm.181969 /LL=21858 /DEF=Mus musculus tissue inhibitor of metalloproteinase 2 (Timp2), mRNA. /PROD=tissue inhibitor of metalloproteinase 2 /FL=gb:NM_011594.1 gb:M93954.1 gb:M82858.1	0.49701	1.2935	1.1479	1.3216	1.2133	0.21801	0.6529	0.43219	0.50425	0.34239	0.4146
1422514_at	2	Aebp1	AE binding protein 1	0006350 // transcription // inferred from electronic annotation /// 0006355 // regulation of transcription, DNA-dependent // inferred from direct assay /// 0006508 // proteolysis // inferred from electronic annotation /// 0007155 // cell adhesion // inferred from electronic annotation /// 0045449 // regulation of transcription // inferred from electronic annotation	0005576 // extracellular region // inferred from electronic annotation /// 0005634 // nucleus // inferred from electronic annotation /// 0005737 // cytoplasm // inferred from electronic annotation	0003677 // DNA binding // inferred from electronic annotation /// 0003714 // transcription corepressor activity // inferred from direct assay /// 0004180 // carboxypeptidase activity // inferred from direct assay /// 0004180 // carboxypeptidase activity // inferred from electronic annotation /// 0004181 // metallocarboxypeptidase activity // inferred from electronic annotation /// 0008270 // zinc…	---	gb:NM_009636.1 /DB_XREF=gi:6752997 /GEN=Aebp1 /FEA=FLmRNA /CNT=120 /TID=Mm.4665.1 /TIER=FL+Stack /STK=57 /UG=Mm.4665 /LL=11568 /DEF=Mus musculus AE binding protein 1 (Aebp1), mRNA. /PROD=AE binding protein 1 /FL=gb:AF053943.1 gb:NM_009636.1	0.6502	1.0094	0.83335	1.5157	1.3502	0.39366	0.54393	0.31636	0.65051	0.52868	0.57678
1423484_at	2	Bicc1	bicaudal C homolog 1 (Drosophila)	0007275 // multicellular organismal development // inferred from electronic annotation	---	0003723 // RNA binding // not recorded /// 0003723 // RNA binding // inferred from electronic annotation	mRNA_processing_binding_Reactome // GenMAPP	gb:BM217996 /DB_XREF=gi:17777386 /DB_XREF=C0905A01-3 /CLONE=C0905A01 /FEA=FLmRNA /CNT=42 /TID=Mm.46051.1 /TIER=Stack /STK=16 /UG=Mm.46051 /LL=83675 /UG_GENE=Bicc1 /UG_TITLE=bicaudal C homolog 1 (Drosophila) /FL=gb:NM_031397.1 gb:AF319464.1	0.65102	0.76096	0.75294	1.0679	1.1261	0.36572	0.45107	0.37253	0.6498	0.40468	0.40391
1423805_at	2	Dab2	disabled homolog 2 (Drosophila)	0000904 // cell morphogenesis involved in differentiation // inferred from mutant phenotype /// 0001701 // in utero embryonic development // inferred from mutant phenotype /// 0006898 // receptor-mediated endocytosis // inferred from physical interaction /// 0006907 // pinocytosis // inferred from mutant phenotype /// 0007588 // excretion // inferred from mutant phenotype /// 0030308 // negative …	0005905 // coated pit // inferred from electronic annotation /// 0016020 // membrane // inferred from electronic annotation /// 0030665 // clathrin coated vesicle membrane // inferred from electronic annotation /// 0031410 // cytoplasmic vesicle // inferred from electronic annotation	0005515 // protein binding // inferred from physical interaction /// 0005515 // protein binding // inferred from electronic annotation /// 0008022 // protein C-terminus binding // inferred from electronic annotation	---	gb:BC016887.1 /DB_XREF=gi:16877247 /FEA=FLmRNA /CNT=210 /TID=Mm.34248.2 /TIER=FL+Stack /STK=54 /UG=Mm.34248 /LL=13132 /UG_GENE=Dab2 /DEF=Mus musculus, clone MGC:18401 IMAGE:4242174, mRNA, complete cds. /PROD=Unknown (protein for MGC:18401) /FL=gb:BC016887.1 gb:BC006588.1	0.656	0.88732	0.8586	1.1158	1.4007	0.49934	0.43487	0.22351	0.50148	0.38754	0.36758
1424762_at	2	C1qtnf5 /// Mfrp	C1q and tumor necrosis factor related protein 5 /// membrane-type frizzled-related protein	0007601 // visual perception // inferred from mutant phenotype /// 0007601 // visual perception // inferred from electronic annotation /// 0050896 // response to stimulus // inferred from electronic annotation	0005576 // extracellular region // inferred from electronic annotation /// 0016020 // membrane // inferred from electronic annotation /// 0016021 // integral to membrane // inferred from electronic annotation	---	---	gb:BC023068.1 /DB_XREF=gi:18605993 /FEA=FLmRNA /CNT=27 /TID=Mm.137121.1 /TIER=FL+Stack /STK=17 /UG=Mm.137121 /DEF=Mus musculus, Similar to DKFZP586B0621 protein, clone MGC:38635 IMAGE:5355789, mRNA, complete cds. /PROD=Similar to DKFZP586B0621 protein /FL=gb:BC023068.1 gb:BC025174.1	0.66027	0.80802	0.79262	1.2538	0.97994	0.38542	0.5049	0.2981	0.60718	0.39095	0.44168
1424932_at	2	Egfr	epidermal growth factor receptor	0000186 // activation of MAPKK activity // inferred from electronic annotation /// 0000902 // cell morphogenesis // inferred from genetic interaction /// 0001892 // embryonic placenta development // inferred from mutant phenotype /// 0001942 // hair follicle development // inferred from mutant phenotype /// 0006412 // translation // inferred from electronic annotation /// 0006468 // protein amino…	0005622 // intracellular // inferred from direct assay /// 0005634 // nucleus // inferred from electronic annotation /// 0005737 // cytoplasm // inferred from electronic annotation /// 0005768 // endosome // inferred from electronic annotation /// 0005886 // plasma membrane // inferred from direct assay /// 0005886 // plasma membrane // inferred from electronic annotation /// 0016020 // membrane …	0000166 // nucleotide binding // inferred from electronic annotation /// 0004672 // protein kinase activity // inferred from electronic annotation /// 0004713 // protein tyrosine kinase activity // inferred from electronic annotation /// 0004714 // transmembrane receptor protein tyrosine kinase activity // inferred from electronic annotation /// 0004716 // receptor signaling protein tyrosine kina…	---	gb:AF275367.1 /DB_XREF=gi:10880775 /GEN=Egfr /FEA=FLmRNA /CNT=41 /TID=Mm.8534.2 /TIER=FL+Stack /STK=11 /UG=Mm.8534 /LL=13649 /DEF=Mus musculus epidermal growth factor receptor (Egfr) mRNA, complete cds. /PROD=epidermal growth factor receptor /FL=gb:U03425.1 gb:AF275367.1	0.59735	0.62008	0.71156	1.1214	1.0762	0.33889	0.42716	0.10421	0.29395	0.13853	0.356
1425458_a_at	2	Grb10	growth factor receptor bound protein 10	0007165 // signal transduction // traceable author statement /// 0007165 // signal transduction // inferred from electronic annotation /// 0046325 // negative regulation of glucose import // inferred from mutant phenotype /// 0046627 // negative regulation of insulin receptor signaling pathway // inferred from mutant phenotype /// 0048009 // insulin-like growth factor receptor signaling pathway /…	0005829 // cytosol // traceable author statement	0004872 // receptor activity // inferred from electronic annotation /// 0005070 // SH3/SH2 adaptor activity // inferred from physical interaction /// 0005158 // insulin receptor binding // inferred from physical interaction /// 0005515 // protein binding // inferred from physical interaction /// 0005515 // protein binding // inferred from electronic annotation	---	gb:AK017862.1 /DB_XREF=gi:12857332 /FEA=FLmRNA /CNT=280 /TID=Mm.24640.2 /TIER=Stack /STK=170 /UG=Mm.24640 /LL=14783 /UG_GENE=Grb10 /UG_TITLE=growth factor receptor bound protein 10 /DEF=Mus musculus 8 days embryo whole body cDNA, RIKEN full-length enriched library, clone:5730571D09:unclassifiable transcript, full insert sequence. /FL=gb:AF022072.1	0.819	0.80554	0.82574	1.0131	1.5206	0.094285	0.28743	0.069208	0.46924	0.45859	0.32363
1426063_a_at	2	Gem	GTP binding protein (gene overexpressed in skeletal muscle)	0007165 // signal transduction // inferred from electronic annotation /// 0007264 // small GTPase mediated signal transduction // inferred from electronic annotation	0005886 // plasma membrane // inferred from electronic annotation /// 0009898 // internal side of plasma membrane // inferred from electronic annotation /// 0016020 // membrane // inferred from electronic annotation	0000166 // nucleotide binding // inferred from electronic annotation /// 0000287 // magnesium ion binding // inferred from electronic annotation /// 0003924 // GTPase activity // inferred from electronic annotation /// 0005525 // GTP binding // inferred from electronic annotation /// 0019003 // GDP binding // inferred from electronic annotation	---	gb:U10551.1 /DB_XREF=gi:511464 /GEN=gem /FEA=FLmRNA /CNT=1 /TID=Mm.4362.2 /TIER=FL /STK=1 /UG=Mm.4362 /LL=14579 /DEF=Mus musculus Gem GTPase (gem) mRNA, complete cds. /PROD=Gem /FL=gb:U10551.1	0.65081	1.2187	1.1065	1.2716	1.4536	0.068093	0.18253	0.14666	0.31758	0.52699	0.30533
1426615_s_at	2	Ndrg4	N-myc downstream regulated gene 4	0007275 // multicellular organismal development // inferred from electronic annotation	---	---	---	gb:AV006122 /DB_XREF=gi:4782972 /DB_XREF=AV006122 /CLONE=1020006I03 /FEA=FLmRNA /CNT=133 /TID=Mm.29846.1 /TIER=Stack /STK=9 /UG=Mm.29846 /UG_TITLE=Mus musculus, Similar to NDRG family, member 4, clone MGC:7067 IMAGE:3156802, mRNA, complete cds /FL=gb:BC006595.1	0.51762	1.0064	0.66225	1.1245	1.1528	0.20312	0.35581	0.11788	0.66932	0.44646	0.41433
1427182_s_at	2	D18Ertd653e	DNA segment, Chr 18, ERATO Doi 653, expressed	---	0005886 // plasma membrane // inferred from electronic annotation /// 0016020 // membrane // inferred from electronic annotation /// 0016021 // integral to membrane // inferred from electronic annotation	---	---	gb:BG070238 /DB_XREF=gi:12552807 /DB_XREF=H3085B09-3 /CLONE=H3085B09 /FEA=mRNA /CNT=30 /TID=Mm.22131.1 /TIER=ConsEnd /STK=4 /UG=Mm.22131 /UG_TITLE=Mus musculus, Similar to chromosome 18 open reading frame 1, clone IMAGE:4488884, mRNA, partial cds	0.65206	0.62447	0.78043	1.2491	1.0195	0.19127	0.49144	0.1915	0.86788	0.41124	0.49548
1427986_a_at	2	Col16a1	collagen, type XVI, alpha 1	0007155 // cell adhesion // inferred from electronic annotation /// 0007155 // cell adhesion // inferred from sequence or structural similarity	0005576 // extracellular region // inferred from electronic annotation /// 0005578 // proteinaceous extracellular matrix // inferred from electronic annotation	0005178 // integrin binding // inferred from electronic annotation /// 0005178 // integrin binding // inferred from sequence or structural similarity /// 0005198 // structural molecule activity // inferred from electronic annotation /// 0005515 // protein binding // inferred from electronic annotation /// 0005515 // protein binding // inferred from sequence or structural similarity	---	gb:BB766878 /DB_XREF=gi:16194279 /DB_XREF=BB766878 /CLONE=G370068E15 /FEA=mRNA /CNT=124 /TID=Mm.41860.1 /TIER=Stack /STK=15 /UG=Mm.41860 /LL=107581 /UG_GENE=Col16a1 /UG_TITLE=procollagen, type XVI, alpha 1	0.62216	0.89851	0.7222	1.0705	1.1654	0.21137	0.19489	0.20705	0.48213	0.4549	0.24177
1429693_at	2	Dab2	disabled homolog 2 (Drosophila)	0000904 // cell morphogenesis involved in differentiation // inferred from mutant phenotype /// 0001701 // in utero embryonic development // inferred from mutant phenotype /// 0006898 // receptor-mediated endocytosis // inferred from physical interaction /// 0006907 // pinocytosis // inferred from mutant phenotype /// 0007588 // excretion // inferred from mutant phenotype /// 0030308 // negative …	0005905 // coated pit // inferred from electronic annotation /// 0016020 // membrane // inferred from electronic annotation /// 0030665 // clathrin coated vesicle membrane // inferred from electronic annotation /// 0031410 // cytoplasmic vesicle // inferred from electronic annotation	0005515 // protein binding // inferred from physical interaction /// 0005515 // protein binding // inferred from electronic annotation /// 0008022 // protein C-terminus binding // inferred from electronic annotation	---	gb:AK017619.1 /DB_XREF=gi:12856954 /FEA=mRNA /CNT=15 /TID=Mm.42174.1 /TIER=Stack /STK=10 /UG=Mm.42174 /LL=70555 /UG_GENE=5730435J12Rik /UG_TITLE=RIKEN cDNA 5730435J12 gene /DEF=Mus musculus 8 days embryo whole body cDNA, RIKEN full-length enriched library, clone:5730435J12:unclassifiable transcript, full insert sequence.	0.52516	0.50952	0.77098	1.1801	1.0318	0.3872	0.44695	0.20606	0.46784	0.33445	0.33775
1431375_s_at	2	Parva	parvin, alpha	0007155 // cell adhesion // inferred from direct assay /// 0007155 // cell adhesion // inferred from electronic annotation /// 0030036 // actin cytoskeleton organization // inferred from electronic annotation /// 0051291 // protein heterooligomerization // inferred from electronic annotation	0005634 // nucleus // inferred from direct assay /// 0005737 // cytoplasm // inferred from direct assay /// 0005737 // cytoplasm // inferred from electronic annotation /// 0005856 // cytoskeleton // inferred from electronic annotation /// 0005886 // plasma membrane // inferred from electronic annotation /// 0005925 // focal adhesion // inferred from direct assay /// 0005925 // focal adhesion // i…	0003779 // actin binding // inferred from direct assay /// 0003779 // actin binding // inferred from electronic annotation /// 0005515 // protein binding // inferred from physical interaction /// 0005515 // protein binding // inferred from electronic annotation	---	gb:BI690209 /DB_XREF=gi:15652838 /DB_XREF=603310412F1 /CLONE=IMAGE:5346458 /FEA=mRNA /CNT=4 /TID=Mm.195762.1 /TIER=ConsEnd /STK=0 /UG=Mm.195762 /LL=76528 /UG_GENE=2010012A22Rik /UG_TITLE=RIKEN cDNA 2010012A22 gene	0.62662	0.61983	0.6537	1.1083	1.0774	0.22358	0.42913	0.1119	0.64055	0.39396	0.46585
1432331_a_at	2	Prrx2	paired related homeobox 2	0002053 // positive regulation of mesenchymal cell proliferation // inferred from genetic interaction /// 0006355 // regulation of transcription, DNA-dependent // inferred from electronic annotation /// 0007275 // multicellular organismal development // inferred from electronic annotation /// 0030326 // embryonic limb morphogenesis // inferred from genetic interaction /// 0042472 // inner ear mor…	0005634 // nucleus // inferred from electronic annotation	0003677 // DNA binding // inferred from electronic annotation /// 0003700 // transcription factor activity // inferred from electronic annotation /// 0030528 // transcription regulator activity // inferred from electronic annotation /// 0043565 // sequence-specific DNA binding // inferred from electronic annotation	---	gb:AK019971.1 /DB_XREF=gi:12860397 /GEN=Prrx2 /FEA=mRNA /CNT=1 /TID=Mm.1802.2 /TIER=ConsEnd /STK=0 /UG=Mm.1802 /LL=20204 /UG_TITLE=paired related homeobox 2 /DEF=Mus musculus 8 days embryo whole body cDNA, RIKEN full-length enriched library, clone:5730524N22:paired related homeobox 2, full insert sequence.	1.0471	1.063	0.94074	1.4129	1.3198	0.4208	0.52062	0.29214	0.76421	0.62087	0.68801
1434089_at	2	Synpo	synaptopodin	0030865 // cortical cytoskeleton organization // non-traceable author statement	0005737 // cytoplasm // inferred from electronic annotation /// 0005856 // cytoskeleton // inferred from electronic annotation /// 0005886 // plasma membrane // inferred from electronic annotation /// 0005923 // tight junction // inferred from electronic annotation /// 0014069 // postsynaptic density // inferred from electronic annotation /// 0015629 // actin cytoskeleton // inferred from direct …	0003779 // actin binding // inferred from direct assay /// 0003779 // actin binding // inferred from electronic annotation	---	gb:BB426294 /DB_XREF=gi:16423669 /DB_XREF=BB426294 /CLONE=C630001F01 /FEA=EST /CNT=72 /TID=Mm.27313.1 /TIER=Stack /STK=43 /UG=Mm.27313 /LL=107019 /UG_GENE=AW046661 /UG_TITLE=expressed sequence AW046661	0.60172	0.56004	0.85597	1.1785	0.961	0.25858	0.59506	0.16782	0.80817	0.40222	0.49776
1434264_at	2	Ank2	ankyrin 2, brain	0006915 // apoptosis // inferred from reviewed computational analysis /// 0007165 // signal transduction // inferred from electronic annotation /// 0008104 // protein localization // inferred from mutant phenotype /// 0034394 // protein localization at cell surface // inferred from mutant phenotype /// 0042981 // regulation of apoptosis // inferred from reviewed computational analysis /// 0060048…	0005737 // cytoplasm // inferred from direct assay /// 0005737 // cytoplasm // inferred from electronic annotation /// 0005856 // cytoskeleton // inferred from electronic annotation /// 0005886 // plasma membrane // inferred from electronic annotation /// 0005887 // integral to plasma membrane // inferred from direct assay /// 0016020 // membrane // inferred from electronic annotation /// 0016324…	0005515 // protein binding // inferred from physical interaction /// 0005515 // protein binding // inferred from electronic annotation	---	gb:BQ174638 /DB_XREF=gi:20350129 /DB_XREF=UI-M-DJ2-bwb-c-17-0-UI.s1 /CLONE=UI-M-DJ2-bwb-c-17-0-UI /FEA=EST /CNT=59 /TID=Mm.41182.1 /TIER=Stack /STK=37 /UG=Mm.41182 /LL=99718 /UG_GENE=AI835472 /UG_TITLE=expressed sequence AI835472	0.35752	0.72496	0.93275	1.1348	1.1557	0.38422	0.5892	0.20221	0.64514	0.53378	0.2485
1434479_at	2	Col5a1	collagen, type V, alpha 1	0001568 // blood vessel development // inferred from mutant phenotype /// 0003007 // heart morphogenesis // inferred from genetic interaction /// 0007155 // cell adhesion // inferred from electronic annotation /// 0030199 // collagen fibril organization // inferred from genetic interaction /// 0030199 // collagen fibril organization // inferred from mutant phenotype /// 0030199 // collagen fibril…	0005576 // extracellular region // inferred from electronic annotation /// 0005578 // proteinaceous extracellular matrix // inferred from electronic annotation /// 0005581 // collagen // inferred from direct assay /// 0005581 // collagen // inferred from mutant phenotype /// 0005581 // collagen // inferred from electronic annotation /// 0005588 // collagen type V // inferred from electronic annot…	0005198 // structural molecule activity // inferred from electronic annotation /// 0005201 // extracellular matrix structural constituent // inferred from direct assay /// 0005201 // extracellular matrix structural constituent // inferred from electronic annotation /// 0005515 // protein binding // inferred from physical interaction /// 0008201 // heparin binding // inferred from electronic annot…	---	gb:AV246911 /DB_XREF=gi:16387161 /DB_XREF=AV246911 /CLONE=4832419L24 /FEA=EST /CNT=61 /TID=Mm.7049.1 /TIER=Stack /STK=31 /UG=Mm.7049 /LL=98940 /UG_GENE=AI413331 /UG_TITLE=expressed sequence AI413331	0.71704	1.1096	1.0099	1.4437	1.6434	0.30141	0.48515	0.23103	0.88244	0.59618	0.3428
1434957_at	2	Cdon	cell adhesion molecule-related/down-regulated by oncogenes	0001708 // cell fate specification // inferred from genetic interaction /// 0007224 // smoothened signaling pathway // inferred from genetic interaction /// 0007224 // smoothened signaling pathway // not recorded /// 0007224 // smoothened signaling pathway // inferred from electronic annotation /// 0007520 // myoblast fusion // inferred from mutant phenotype /// 0010172 // embryonic body morphoge…	0005887 // integral to plasma membrane // not recorded /// 0009986 // cell surface // traceable author statement /// 0009986 // cell surface // inferred from electronic annotation /// 0016020 // membrane // inferred from electronic annotation /// 0016021 // integral to membrane // inferred from electronic annotation	0005515 // protein binding // inferred from physical interaction /// 0005515 // protein binding // inferred from electronic annotation	---	gb:AW557006 /DB_XREF=gi:7202435 /DB_XREF=L0276B05-3 /CLONE=L0276B05 /FEA=EST /CNT=30 /TID=Mm.80509.1 /TIER=Stack /STK=22 /UG=Mm.80509 /UG_TITLE=ESTs	0.45797	0.63823	0.78634	1.2186	0.84994	0.28075	0.40234	0.19139	0.66769	0.59552	0.73974
1435584_at	2	A630033H20Rik	RIKEN cDNA A630033H20 gene	0007165 // signal transduction // inferred from electronic annotation /// 0007186 // G-protein coupled receptor protein signaling pathway // inferred from electronic annotation	0005886 // plasma membrane // inferred from electronic annotation /// 0016020 // membrane // inferred from electronic annotation /// 0016021 // integral to membrane // inferred from electronic annotation	0004871 // signal transducer activity // inferred from electronic annotation /// 0004872 // receptor activity // inferred from electronic annotation /// 0004930 // G-protein coupled receptor activity // inferred from electronic annotation /// 0045028 // purinergic nucleotide receptor activity, G-protein coupled // inferred from electronic annotation	---	gb:BB034567 /DB_XREF=gi:15403646 /DB_XREF=BB034567 /CLONE=5830499F16 /FEA=EST /CNT=18 /TID=Mm.37986.1 /TIER=Stack /STK=15 /UG=Mm.37986 /LL=102932 /UG_GENE=AI662791 /UG_TITLE=expressed sequence AI662791	0.79247	0.94275	0.62601	1.1191	1.1442	0.30691	0.17985	0.10431	0.3233	0.25396	0.259
1435888_at	2	Egfr	epidermal growth factor receptor	0000902 // cell morphogenesis // inferred from genetic interaction /// 0001892 // embryonic placenta development // inferred from mutant phenotype /// 0001942 // hair follicle development // inferred from mutant phenotype /// 0006468 // protein amino acid phosphorylation // inferred from electronic annotation /// 0007165 // signal transduction // inferred from direct assay /// 0007166 // cell sur…	0005622 // intracellular // inferred from direct assay /// 0005886 // plasma membrane // inferred from direct assay /// 0016020 // membrane // inferred from electronic annotation /// 0016021 // integral to membrane // inferred from electronic annotation /// 0016323 // basolateral plasma membrane // inferred from direct assay /// 0030139 // endocytic vesicle // inferred from direct assay	0000166 // nucleotide binding // inferred from electronic annotation /// 0004672 // protein kinase activity // inferred from electronic annotation /// 0004713 // protein tyrosine kinase activity // inferred from electronic annotation /// 0004714 // transmembrane receptor protein tyrosine kinase activity // inferred from electronic annotation /// 0004871 // signal transducer activity // inferred f…	---	gb:AV369812 /DB_XREF=gi:15406776 /DB_XREF=AV369812 /CLONE=9030024J15 /FEA=EST /CNT=31 /TID=Mm.27299.1 /TIER=Stack /STK=12 /UG=Mm.27299 /LL=103781 /UG_GENE=AI552599 /UG_TITLE=expressed sequence AI552599	0.53779	0.73208	0.77997	1.2587	1.3387	0.21889	0.38431	0.11291	0.26377	0.19898	0.13534
1436029_at	2	Bicc1	bicaudal C homolog 1 (Drosophila)	0007275 // multicellular organismal development // inferred from electronic annotation	---	0003723 // RNA binding // not recorded /// 0003723 // RNA binding // inferred from electronic annotation	mRNA_processing_binding_Reactome // GenMAPP	gb:AW551930 /DB_XREF=gi:7197353 /DB_XREF=L0205G09-3 /CLONE=L0205G09 /FEA=EST /CNT=42 /TID=Mm.25695.2 /TIER=Stack /STK=11 /UG=Mm.25695 /LL=75189 /UG_GENE=4930533K18Rik /UG_TITLE=RIKEN cDNA 4930533K18 gene	0.62563	0.7569	0.63654	1.0005	1.1132	0.37185	0.33018	0.20402	0.54104	0.39084	0.31686
1436188_a_at	2	Ndrg4	N-myc downstream regulated gene 4	0007275 // multicellular organismal development // inferred from electronic annotation	---	---	---	gb:AI837704 /DB_XREF=gi:5471917 /DB_XREF=UI-M-AK0-adj-e-01-0-UI.s1 /CLONE=UI-M-AK0-adj-e-01-0-UI /FEA=EST /CNT=16 /TID=Mm.29846.2 /TIER=Stack /STK=10 /UG=Mm.29846 /UG_TITLE=Mus musculus, Similar to NDRG family, member 4, clone MGC:7067 IMAGE:3156802, mRNA, complete cds	0.67201	0.92381	0.88186	1.237	1.2347	0.16648	0.32723	0.11032	0.75495	0.58168	0.25649
1436759_x_at	2	Cnn3 /// LOC100047856	calponin 3, acidic /// similar to calponin 3, acidic	0031032 // actomyosin structure organization // inferred from electronic annotation	0014069 // postsynaptic density // inferred from electronic annotation /// 0043025 // cell soma // inferred from electronic annotation /// 0043197 // dendritic spine // inferred from electronic annotation	0003779 // actin binding // inferred from electronic annotation /// 0005515 // protein binding // inferred from physical interaction /// 0005516 // calmodulin binding // inferred from electronic annotation /// 0008017 // microtubule binding // inferred from electronic annotation	---	gb:AV172168 /DB_XREF=gi:5378606 /DB_XREF=AV172168 /CLONE=3300004C24 /FEA=EST /CNT=60 /TID=Mm.22171.3 /TIER=Stack /STK=60 /UG=Mm.22171 /LL=71994 /UG_GENE=Cnn3 /UG_TITLE=calponin 3, acidic	0.95179	0.82651	0.79428	0.95624	0.96109	0.28312	0.38217	0.083059	0.44255	0.38692	0.3204
1437165_a_at	2	Pcolce	procollagen C-endopeptidase enhancer protein	0006508 // proteolysis // inferred from direct assay	0005576 // extracellular region // inferred from electronic annotation	0005515 // protein binding // inferred from electronic annotation	mRNA_processing_binding_Reactome // GenMAPP	gb:BB250811 /DB_XREF=gi:8943557 /DB_XREF=BB250811 /CLONE=A730043A14 /FEA=EST /CNT=25 /TID=Mm.18808.3 /TIER=Stack /STK=24 /UG=Mm.18808 /LL=18542 /UG_GENE=Pcolce /UG_TITLE=procollagen C-proteinase enhancer protein	0.76544	0.6891	0.82905	1.3852	1.2558	0.20812	0.36572	0.15474	0.85211	0.71335	0.46009
1437279_x_at	2	Sdc1	syndecan 1	0001822 // kidney development // inferred from electronic annotation /// 0009636 // response to toxin // inferred from electronic annotation /// 0042060 // wound healing // inferred from electronic annotation /// 0042476 // odontogenesis // inferred from electronic annotation /// 0042542 // response to hydrogen peroxide // inferred from electronic annotation /// 0048627 // myoblast development //…	0001931 // uropod // inferred from electronic annotation /// 0005737 // cytoplasm // inferred from electronic annotation /// 0005925 // focal adhesion // inferred from electronic annotation /// 0009986 // cell surface // inferred from direct assay /// 0016020 // membrane // inferred from electronic annotation /// 0016021 // integral to membrane // inferred from electronic annotation /// 0043234 /…	0008022 // protein C-terminus binding // inferred from electronic annotation /// 0008092 // cytoskeletal protein binding // inferred from electronic annotation	---	gb:BB533095 /DB_XREF=gi:9585024 /DB_XREF=BB533095 /CLONE=E030028F02 /FEA=EST /CNT=21 /TID=Mm.2580.2 /TIER=Stack /STK=21 /UG=Mm.2580 /LL=20969 /UG_GENE=Sdc1 /UG_TITLE=syndecan 1	0.89268	0.66207	0.68084	1.4582	1.0528	0.12692	0.172	0.056258	0.75386	0.47664	0.47434
1438354_x_at	2	Cnn3	Calponin 3, acidic	0031032 // actomyosin structure organization // inferred from electronic annotation	0014069 // postsynaptic density // inferred from electronic annotation /// 0043025 // cell soma // inferred from electronic annotation /// 0043197 // dendritic spine // inferred from electronic annotation	0003779 // actin binding // inferred from electronic annotation /// 0005515 // protein binding // inferred from physical interaction /// 0005516 // calmodulin binding // inferred from electronic annotation /// 0008017 // microtubule binding // inferred from electronic annotation	---	gb:BB705075 /DB_XREF=gi:16053910 /DB_XREF=BB705075 /CLONE=7420473B13 /FEA=EST /CNT=11 /TID=Mm.22171.7 /TIER=Stack /STK=11 /UG=Mm.22171 /LL=71994 /UG_GENE=Cnn3 /UG_TITLE=calponin 3, acidic	0.90651	0.85505	0.68103	1.0387	1.0072	0.16406	0.21156	0.046136	0.46356	0.42447	0.26098
1439191_at	2	---	---	---	---	---	---	gb:BB540658 /DB_XREF=gi:16447143 /DB_XREF=BB540658 /CLONE=E130107G13 /FEA=EST /CNT=13 /TID=Mm.22763.2 /TIER=Stack /STK=8 /UG=Mm.22763 /LL=14314 /UG_GENE=Fstl /UG_TITLE=follistatin-like	0.68418	0.57248	1.0327	1.507	1.508	0.25745	0.28571	0.25336	0.42537	0.43722	0.10874
1440920_at	2	Mmp14	Matrix metallopeptidase 14 (membrane-inserted)	0001503 // ossification // inferred from electronic annotation /// 0001525 // angiogenesis // inferred from electronic annotation /// 0001541 // ovarian follicle development // inferred from electronic annotation /// 0001666 // response to hypoxia // inferred from electronic annotation /// 0001935 // endothelial cell proliferation // inferred from electronic annotation /// 0006508 // proteolysis …	0005578 // proteinaceous extracellular matrix // inferred from electronic annotation /// 0005737 // cytoplasm // inferred from electronic annotation /// 0016020 // membrane // inferred from electronic annotation /// 0016021 // integral to membrane // inferred from electronic annotation /// 0042470 // melanosome // inferred from electronic annotation	0004222 // metalloendopeptidase activity // inferred from electronic annotation /// 0005509 // calcium ion binding // inferred from electronic annotation /// 0005515 // protein binding // inferred from electronic annotation /// 0008233 // peptidase activity // inferred from electronic annotation /// 0008237 // metallopeptidase activity // inferred from electronic annotation /// 0008270 // zinc io…	Matrix_Metalloproteinases // GenMAPP	gb:BB535404 /DB_XREF=gi:16446544 /DB_XREF=BB535404 /CLONE=E030043F24 /FEA=EST /CNT=10 /TID=Mm.209850.1 /TIER=ConsEnd /STK=4 /UG=Mm.209850 /UG_TITLE=ESTs	0.53969	0.8748	0.86142	1.1115	1.2594	0.20509	0.24593	0.30819	0.44332	0.42951	0.20293
1440975_at	2	Mxra7	matrix-remodelling associated 7	---	0016020 // membrane // inferred from electronic annotation /// 0016021 // integral to membrane // inferred from electronic annotation	---	---	gb:BB275943 /DB_XREF=gi:16400865 /DB_XREF=BB275943 /CLONE=A830095F23 /FEA=EST /CNT=9 /TID=Mm.44857.1 /TIER=ConsEnd /STK=4 /UG=Mm.44857 /UG_TITLE=ESTs	0.69197	0.6749	0.99385	1.362	1.212	0.44176	0.41611	0.24927	0.68306	0.26055	0.084321
1441137_at	2	Bicc1	bicaudal C homolog 1 (Drosophila)	0007275 // multicellular organismal development // inferred from electronic annotation	---	0003723 // RNA binding // not recorded /// 0003723 // RNA binding // inferred from electronic annotation	mRNA_processing_binding_Reactome // GenMAPP	gb:AV260198 /DB_XREF=gi:16388721 /DB_XREF=AV260198 /CLONE=4930412D03 /FEA=EST /CNT=6 /TID=Mm.179033.1 /TIER=ConsEnd /STK=4 /UG=Mm.179033 /UG_TITLE=ESTs	0.86422	0.76682	0.84394	1.1927	1.2671	0.2707	0.3572	0.30906	0.70192	0.43182	0.50177
1448433_a_at	2	Pcolce	procollagen C-endopeptidase enhancer protein	0006508 // proteolysis // inferred from direct assay	0005576 // extracellular region // inferred from electronic annotation	0005515 // protein binding // inferred from electronic annotation	mRNA_processing_binding_Reactome // GenMAPP	gb:NM_008788.1 /DB_XREF=gi:6679220 /GEN=Pcolce /FEA=FLmRNA /CNT=152 /TID=Mm.18808.1 /TIER=FL+Stack /STK=74 /UG=Mm.18808 /LL=18542 /DEF=Mus musculus procollagen C-proteinase enhancer protein (Pcolce), mRNA. /PROD=procollagen C-proteinase enhancer protein /FL=gb:NM_008788.1	0.61058	0.74757	0.82401	1.3517	1.1916	0.36464	0.61763	0.34235	0.7414	0.64591	0.54831
1449531_at	2	Leprel2	leprecan-like 2	0055114 // oxidation reduction // inferred from electronic annotation	0005783 // endoplasmic reticulum // inferred from electronic annotation	0005506 // iron ion binding // inferred from electronic annotation /// 0016491 // oxidoreductase activity // inferred from electronic annotation /// 0016702 // oxidoreductase activity, acting on single donors with incorporation of molecular oxygen, incorporation of two atoms of oxygen // inferred from electronic annotation /// 0016705 // oxidoreductase activity, acting on paired donors, with inco…	---	gb:BC003726.1 /DB_XREF=gi:13277629 /FEA=FLmRNA /CNT=22 /TID=Mm.35708.1 /TIER=FL+Stack /STK=8 /UG=Mm.35708 /LL=14789 /UG_GENE=Grcb /DEF=Mus musculus, gene rich cluster, B gene, clone MGC:5777 IMAGE:3497610, mRNA, complete cds. /PROD=gene rich cluster, B gene /FL=gb:BC016431.1 gb:NM_013534.1 gb:BC003726.1	0.7035	0.78757	0.68004	1.2441	0.9836	0.012333	0.28605	0.019328	0.58778	0.41802	0.37096
1450040_at	2	Timp2	tissue inhibitor of metalloproteinase 2	0008285 // negative regulation of cell proliferation // inferred from direct assay /// 0030814 // regulation of cAMP metabolic process // inferred from direct assay /// 0043408 // regulation of MAPKKK cascade // inferred from direct assay /// 0045664 // regulation of neuron differentiation // inferred from direct assay /// 0045664 // regulation of neuron differentiation // inferred from mutant ph…	0005576 // extracellular region // inferred from electronic annotation /// 0005578 // proteinaceous extracellular matrix // inferred from electronic annotation /// 0005604 // basement membrane // inferred from direct assay /// 0009986 // cell surface // inferred from direct assay	0004857 // enzyme inhibitor activity // inferred from electronic annotation /// 0005178 // integrin binding // inferred from direct assay /// 0005515 // protein binding // inferred from electronic annotation /// 0008047 // enzyme activator activity // inferred from mutant phenotype /// 0008191 // metalloendopeptidase inhibitor activity // inferred from mutant phenotype /// 0008191 // metalloendop…	Matrix_Metalloproteinases // GenMAPP	gb:BE986727 /DB_XREF=gi:10661349 /DB_XREF=UI-M-CG0p-bey-a-11-0-UI.s1 /CLONE=UI-M-CG0p-bey-a-11-0-UI /FEA=FLmRNA /CNT=152 /TID=Mm.181969.1 /TIER=ConsEnd /STK=1 /UG=Mm.181969 /LL=21858 /UG_GENE=Timp2 /UG_TITLE=tissue inhibitor of metalloproteinase 2 /FL=gb:NM_011594.1 gb:M93954.1 gb:M82858.1	0.67065	1.111	0.64269	1.1411	1.1857	0.23012	0.41455	0.316	0.54845	0.33265	0.38017
1450637_a_at	2	Aebp1	AE binding protein 1	0006350 // transcription // inferred from electronic annotation /// 0006355 // regulation of transcription, DNA-dependent // inferred from direct assay /// 0006508 // proteolysis // inferred from electronic annotation /// 0007155 // cell adhesion // inferred from electronic annotation /// 0045449 // regulation of transcription // inferred from electronic annotation	0005576 // extracellular region // inferred from electronic annotation /// 0005634 // nucleus // inferred from electronic annotation /// 0005737 // cytoplasm // inferred from electronic annotation	0003677 // DNA binding // inferred from electronic annotation /// 0003714 // transcription corepressor activity // inferred from direct assay /// 0004180 // carboxypeptidase activity // inferred from direct assay /// 0004180 // carboxypeptidase activity // inferred from electronic annotation /// 0004181 // metallocarboxypeptidase activity // inferred from electronic annotation /// 0008270 // zinc…	---	gb:NM_009636.1 /DB_XREF=gi:6752997 /GEN=Aebp1 /FEA=FLmRNA /CNT=120 /TID=Mm.4665.1 /TIER=FL+Stack /STK=57 /UG=Mm.4665 /LL=11568 /DEF=Mus musculus AE binding protein 1 (Aebp1), mRNA. /PROD=AE binding protein 1 /FL=gb:AF053943.1 gb:NM_009636.1	0.76059	0.87032	0.7934	1.268	1.1622	0.36875	0.537	0.28527	0.6321	0.51063	0.50173
1451031_at	2	Sfrp4	secreted frizzled-related protein 4	0007275 // multicellular organismal development // inferred from electronic annotation /// 0016055 // Wnt receptor signaling pathway // inferred from electronic annotation /// 0030154 // cell differentiation // inferred from electronic annotation	0005576 // extracellular region // inferred from electronic annotation	0005515 // protein binding // inferred from electronic annotation	---	gb:BB221995 /DB_XREF=gi:8890607 /DB_XREF=BB221995 /CLONE=A530072N11 /FEA=FLmRNA /CNT=51 /TID=Mm.42095.1 /TIER=Stack /STK=10 /UG=Mm.42095 /LL=20379 /UG_GENE=Sfrp4 /UG_TITLE=secreted frizzled-related sequence protein 4 /FL=gb:AF117709.1 gb:NM_016687.1	0.64246	0.78125	0.74626	0.80993	0.83496	0.49936	0.57493	0.31915	0.74989	0.52095	0.50036
1451332_at	2	Zfp521	zinc finger protein 521	0006350 // transcription // inferred from electronic annotation /// 0007275 // multicellular organismal development // inferred from electronic annotation /// 0030154 // cell differentiation // inferred from electronic annotation /// 0045449 // regulation of transcription // inferred from electronic annotation	0005622 // intracellular // inferred from electronic annotation /// 0005634 // nucleus // not recorded /// 0005634 // nucleus // inferred from electronic annotation	0003676 // nucleic acid binding // inferred from electronic annotation /// 0003677 // DNA binding // inferred from electronic annotation /// 0008270 // zinc ion binding // inferred from electronic annotation /// 0019904 // protein domain specific binding // inferred from electronic annotation /// 0046872 // metal ion binding // inferred from electronic annotation	---	gb:BC021376.1 /DB_XREF=gi:18204059 /FEA=FLmRNA /CNT=50 /TID=Mm.40325.1 /TIER=FL+Stack /STK=36 /UG=Mm.40325 /DEF=Mus musculus, clone MGC:29358 IMAGE:5038671, mRNA, complete cds. /PROD=Unknown (protein for MGC:29358) /FL=gb:BC021376.1	0.64439	1.1268	0.7791	1.2728	1.3385	0.30137	0.4609	0.21211	0.80693	0.56596	0.63081
1452014_a_at	2	Igf1	insulin-like growth factor 1	0001649 // osteoblast differentiation // inferred from expression pattern /// 0006916 // anti-apoptosis // inferred from direct assay /// 0007399 // nervous system development // inferred from mutant phenotype /// 0010001 // glial cell differentiation // inferred from mutant phenotype /// 0014068 // positive regulation of phosphoinositide 3-kinase cascade // inferred from electronic annotation //…	0005576 // extracellular region // inferred from electronic annotation /// 0005615 // extracellular space // inferred from direct assay	0005158 // insulin receptor binding // inferred from electronic annotation /// 0005159 // insulin-like growth factor receptor binding // inferred from physical interaction /// 0005179 // hormone activity // inferred from electronic annotation /// 0005515 // protein binding // inferred from physical interaction /// 0008083 // growth factor activity // inferred from electronic annotation	---	gb:AF440694.1 /DB_XREF=gi:17046474 /FEA=FLmRNA /CNT=37 /TID=Mm.2770.2 /TIER=FL+Stack /STK=8 /UG=Mm.2770 /LL=16000 /UG_GENE=Igf1 /DEF=Mus musculus insulin-like growth factor 1 mRNA, complete cds. /PROD=insulin-like growth factor 1 /FL=gb:AF440694.1	1.0045	0.96144	0.62826	1.4536	1.1525	0.24585	0.54886	0.49765	0.36653	0.27347	0.42057
1454613_at	2	Dpysl3	dihydropyrimidinase-like 3	0007399 // nervous system development // inferred from direct assay	0005737 // cytoplasm // inferred from electronic annotation /// 0030426 // growth cone // inferred from electronic annotation /// 0042995 // cell projection // inferred from electronic annotation	0016787 // hydrolase activity // inferred from electronic annotation /// 0016810 // hydrolase activity, acting on carbon-nitrogen (but not peptide) bonds // inferred from electronic annotation	---	gb:AV162270 /DB_XREF=gi:16383390 /DB_XREF=AV162270 /CLONE=3110001I16 /FEA=EST /CNT=280 /TID=Mm.8180.2 /TIER=Stack /STK=151 /UG=Mm.8180 /LL=110454 /UG_GENE=Ly6a /UG_TITLE=lymphocyte antigen 6 complex, locus A	0.49656	0.83571	0.87472	1.1953	1.2087	0.21921	0.51626	0.31714	0.73738	0.47472	0.39862
1455570_x_at	2	Cnn3 /// LOC100047856	calponin 3, acidic /// similar to calponin 3, acidic	0031032 // actomyosin structure organization // inferred from electronic annotation	0014069 // postsynaptic density // inferred from electronic annotation /// 0043025 // cell soma // inferred from electronic annotation /// 0043197 // dendritic spine // inferred from electronic annotation	0003779 // actin binding // inferred from electronic annotation /// 0005515 // protein binding // inferred from physical interaction /// 0005516 // calmodulin binding // inferred from electronic annotation /// 0008017 // microtubule binding // inferred from electronic annotation	---	gb:BB833102 /DB_XREF=gi:17011345 /DB_XREF=BB833102 /CLONE=G930025A10 /FEA=EST /CNT=11 /TID=Mm.22171.2 /TIER=Stack /STK=11 /UG=Mm.22171 /LL=71994 /UG_GENE=Cnn3 /UG_TITLE=calponin 3, acidic	0.85852	0.7749	0.64115	0.90447	1.0052	0.42443	0.45424	0.20139	0.44311	0.34286	0.41777
1455582_at	2	---	---	---	---	---	---	gb:BI156044 /DB_XREF=gi:14616045 /DB_XREF=602903593F1 /CLONE=IMAGE:5033207 /FEA=EST /CNT=37 /TID=Mm.9653.3 /TIER=Stack /STK=10 /UG=Mm.9653 /LL=23882 /UG_GENE=Gadd45g /UG_TITLE=growth arrest and DNA-damage-inducible 45 gamma	0.5921	1.0564	0.84056	1.1789	1.4778	0.32386	0.45552	0.29576	0.68718	0.33358	0.45256
1457042_at	2	AI256396	EST AI256396	---	---	---	---	gb:BB328287 /DB_XREF=gi:16403831 /DB_XREF=BB328287 /CLONE=B430312A05 /FEA=EST /CNT=9 /TID=Mm.103052.1 /TIER=ConsEnd /STK=5 /UG=Mm.103052 /UG_TITLE=ESTs	0.46893	0.66821	0.90463	1.4366	1.6105	-0.026371	0.17209	0.014295	0.45309	0.46208	0.14081
1457139_at	2	Auts2	Autism susceptibility candidate 2	---	---	---	---	gb:AV021813 /DB_XREF=gi:4798805 /DB_XREF=AV021813 /CLONE=1190024F24 /FEA=EST /CNT=6 /TID=Mm.213243.1 /TIER=ConsEnd /STK=5 /UG=Mm.213243 /UG_TITLE=ESTs	0.79371	0.84282	0.72956	1.4005	1.211	0.26579	0.34982	0.24638	0.5186	0.29956	0.2342
1458947_at	2	---	---	---	---	---	---	gb:AV341977 /DB_XREF=gi:16396962 /DB_XREF=AV341977 /CLONE=6430525L24 /FEA=EST /CNT=3 /TID=Mm.63549.1 /TIER=ConsEnd /STK=2 /UG=Mm.63549 /UG_TITLE=ESTs	0.5787	1.0658	1.038	1.4158	1.4799	0.36751	0.44002	0.34101	0.63255	0.37526	0.29347
1459749_s_at	2	Fat4	FAT tumor suppressor homolog 4 (Drosophila)	0007155 // cell adhesion // inferred from electronic annotation /// 0007156 // homophilic cell adhesion // inferred from electronic annotation	0016020 // membrane // inferred from electronic annotation /// 0016021 // integral to membrane // inferred from electronic annotation	0005509 // calcium ion binding // inferred from electronic annotation /// 0005515 // protein binding // inferred from electronic annotation	---	gb:BB536078 /DB_XREF=gi:9591578 /DB_XREF=BB536078 /CLONE=E030047K14 /FEA=EST /CNT=2 /TID=Mm.149973.1 /TIER=ConsEnd /STK=2 /UG=Mm.149973 /UG_TITLE=ESTs	1.0081	1.3359	0.99586	1.4462	1.6835	0.19588	0.29533	0.022355	0.68968	0.6761	0.62267
1460574_at	2	Fat4	FAT tumor suppressor homolog 4 (Drosophila)	0007155 // cell adhesion // inferred from electronic annotation /// 0007156 // homophilic cell adhesion // inferred from electronic annotation	0016020 // membrane // inferred from electronic annotation /// 0016021 // integral to membrane // inferred from electronic annotation	0005509 // calcium ion binding // inferred from electronic annotation /// 0005515 // protein binding // inferred from electronic annotation	---	gb:BB038914 /DB_XREF=gi:16258518 /DB_XREF=BB038914 /CLONE=6030410K14 /FEA=EST /CNT=28 /TID=Mm.112333.1 /TIER=Stack /STK=23 /UG=Mm.112333 /UG_TITLE=ESTs	0.85116	1.2809	0.85265	1.1421	1.2508	0.2004	0.27528	0.25253	0.38882	0.45738	0.45601
1417624_at	3	Nab1	Ngfi-A binding protein 1	0001958 // endochondral ossification // inferred from genetic interaction /// 0006350 // transcription // inferred from electronic annotation /// 0014037 // Schwann cell differentiation // inferred from genetic interaction /// 0016481 // negative regulation of transcription // inferred from electronic annotation /// 0042552 // myelination // inferred from genetic interaction /// 0045449 // regula…	0005634 // nucleus // inferred from electronic annotation /// 0005794 // Golgi apparatus // inferred from electronic annotation /// 0005886 // plasma membrane // inferred from electronic annotation	0016564 // transcription repressor activity // inferred from electronic annotation /// 0030528 // transcription regulator activity // inferred from genetic interaction	---	gb:BC016886.1 /DB_XREF=gi:16877244 /FEA=FLmRNA /CNT=130 /TID=Mm.25903.1 /TIER=FL+Stack /STK=40 /UG=Mm.25903 /LL=17936 /UG_GENE=Nab1 /DEF=Mus musculus, Ngfi-A binding protein 1, clone MGC:18399 IMAGE:4236565, mRNA, complete cds. /PROD=Ngfi-A binding protein 1 /FL=gb:BC005627.1 gb:NM_008667.1 gb:U47008.1 gb:BC016886.1	0.31831	0.19995	0.5979	0.83227	0.60035	0.063649	0.076956	0.072027	0.080302	0.082764	-0.48268
1419181_at	3	Zfp326	zinc finger protein 326	0006350 // transcription // inferred from electronic annotation /// 0045449 // regulation of transcription // inferred from electronic annotation /// 0045941 // positive regulation of transcription // inferred from direct assay	0005622 // intracellular // inferred from electronic annotation /// 0005626 // insoluble fraction // inferred from direct assay /// 0005634 // nucleus // inferred from direct assay /// 0005634 // nucleus // inferred from electronic annotation /// 0016363 // nuclear matrix // inferred from direct assay /// 0016363 // nuclear matrix // inferred from electronic annotation	0003677 // DNA binding // inferred from direct assay /// 0003677 // DNA binding // inferred from electronic annotation /// 0008270 // zinc ion binding // inferred from direct assay /// 0008270 // zinc ion binding // inferred from electronic annotation /// 0016563 // transcription activator activity // inferred from direct assay /// 0046872 // metal ion binding // inferred from electronic annotati…	---	gb:NM_018759.1 /DB_XREF=gi:9055385 /GEN=Zfp326 /FEA=FLmRNA /CNT=42 /TID=Mm.12891.1 /TIER=FL+Stack /STK=12 /UG=Mm.12891 /LL=54367 /DEF=Mus musculus zinc finger protein 326 (Zfp326), mRNA. /PROD=zinc finger protein 326 /FL=gb:NM_018759.1 gb:AB012725.1	0.31163	0.13039	0.55658	0.70762	0.56342	-0.16229	-0.12286	-0.097403	0.20673	0.19397	-0.14311
1419295_at	3	Creb3l1	cAMP responsive element binding protein 3-like 1	0006350 // transcription // inferred from electronic annotation /// 0006355 // regulation of transcription, DNA-dependent // inferred from electronic annotation /// 0006986 // response to unfolded protein // inferred from electronic annotation /// 0045449 // regulation of transcription // inferred from electronic annotation	0005634 // nucleus // inferred from electronic annotation /// 0005783 // endoplasmic reticulum // inferred from electronic annotation /// 0016020 // membrane // inferred from electronic annotation /// 0016021 // integral to membrane // inferred from electronic annotation	0003677 // DNA binding // inferred from electronic annotation /// 0003700 // transcription factor activity // inferred from sequence or structural similarity /// 0003700 // transcription factor activity // inferred from electronic annotation /// 0043565 // sequence-specific DNA binding // inferred from electronic annotation /// 0046983 // protein dimerization activity // inferred from electronic …	G1_to_S_cell_cycle_Reactome // GenMAPP	gb:BC016447.1 /DB_XREF=gi:16741209 /FEA=FLmRNA /CNT=45 /TID=Mm.10353.1 /TIER=FL+Stack /STK=11 /UG=Mm.10353 /LL=26427 /UG_GENE=Oasis-pending /DEF=Mus musculus, old astrocyte specifically induced substance, clone MGC:25246 IMAGE:4921584, mRNA, complete cds. /PROD=old astrocyte specifically induced substance /FL=gb:NM_011957.1 gb:AB017614.1 gb:BC016447.1	0.35979	0.10334	0.51975	0.63453	0.891	-0.15965	-0.18643	-0.17818	0.074718	0.26524	0.034823
1419381_at	3	Terf2ip	telomeric repeat binding factor 2, interacting protein	0031848 // protection from non-homologous end joining at telomere // inferred from electronic annotation /// 0032205 // negative regulation of telomere maintenance // inferred from electronic annotation /// 0045449 // regulation of transcription // inferred from electronic annotation /// 0070198 // protein localization to telomere // inferred from electronic annotation	0000781 // chromosome, telomeric region // inferred from electronic annotation /// 0000783 // nuclear telomere cap complex // inferred from electronic annotation /// 0000784 // nuclear chromosome, telomeric region // inferred from direct assay /// 0005634 // nucleus // inferred from electronic annotation /// 0005694 // chromosome // inferred from electronic annotation /// 0005737 // cytoplasm // …	0003677 // DNA binding // inferred from electronic annotation /// 0005515 // protein binding // inferred from electronic annotation	---	gb:NM_020584.1 /DB_XREF=gi:15618998 /GEN=Terf2ip /FEA=FLmRNA /CNT=34 /TID=Mm.213064.1 /TIER=FL+Stack /STK=10 /UG=Mm.213064 /LL=57321 /DEF=Mus musculus telomeric repeat binding factor 2, interacting protein (Terf2ip), mRNA. /PROD=telomeric repeat binding factor 2, interactingprotein /FL=gb:NM_020584.1	0.29036	-0.053614	0.52916	0.81764	0.76164	0.10381	0.075358	0.055096	0.36494	0.14631	-0.093952
1421871_at	3	Sh3bgrl	SH3-binding domain glutamic acid-rich protein like	---	---	0017124 // SH3 domain binding // inferred from electronic annotation	---	gb:NM_019989.1 /DB_XREF=gi:9910547 /GEN=Sh3bgrl /FEA=FLmRNA /CNT=74 /TID=Mm.196451.1 /TIER=FL /STK=1 /UG=Mm.196451 /LL=56726 /DEF=Mus musculus SH3-binding domain glutamic acid-rich protein like (Sh3bgrl), mRNA. /PROD=SH3-binding domain glutamic acid-rich proteinlike /FL=gb:NM_019989.1	0.29968	0.16089	0.64226	0.76395	0.77529	-0.03835	0.027332	0.015169	-0.0031683	0.062575	-0.28019
1422135_at	3	Zfp146	zinc finger protein 146	---	0005622 // intracellular // inferred from electronic annotation /// 0005634 // nucleus // inferred from electronic annotation /// 0005730 // nucleolus // inferred from electronic annotation /// 0005737 // cytoplasm // inferred from electronic annotation	0003676 // nucleic acid binding // inferred from electronic annotation /// 0003677 // DNA binding // inferred from electronic annotation /// 0008270 // zinc ion binding // inferred from electronic annotation /// 0046872 // metal ion binding // inferred from electronic annotation	---	gb:NM_011980.1 /DB_XREF=gi:6756046 /GEN=Zfp146 /FEA=FLmRNA /CNT=9 /TID=Mm.42054.1 /TIER=FL /STK=1 /UG=Mm.42054 /LL=26465 /DEF=Mus musculus zinc finger protein 146 (Zfp146), mRNA. /PROD=zinc finger protein 146 /FL=gb:NM_011980.1	0.17614	0.15285	0.73869	0.65905	0.699	-0.15193	0.1984	-0.0072452	0.24022	0.25835	0.035176
1422555_s_at	3	Gna13	guanine nucleotide binding protein, alpha 13	0001525 // angiogenesis // inferred from mutant phenotype /// 0001569 // patterning of blood vessels // inferred from mutant phenotype /// 0001701 // in utero embryonic development // inferred from genetic interaction /// 0007165 // signal transduction // inferred from electronic annotation /// 0007186 // G-protein coupled receptor protein signaling pathway // not recorded /// 0007186 // G-protei…	0005834 // heterotrimeric G-protein complex // not recorded /// 0005834 // heterotrimeric G-protein complex // traceable author statement /// 0005834 // heterotrimeric G-protein complex // inferred from electronic annotation /// 0016020 // membrane // inferred from electronic annotation /// 0031225 // anchored to membrane // inferred from electronic annotation /// 0031526 // brush border membrane…	0000166 // nucleotide binding // inferred from electronic annotation /// 0001664 // G-protein-coupled receptor binding // inferred from electronic annotation /// 0003924 // GTPase activity // not recorded /// 0003924 // GTPase activity // traceable author statement /// 0004871 // signal transducer activity // inferred from electronic annotation /// 0005515 // protein binding // inferred from elec…	G13_Signaling_Pathway // GenMAPP /// G_Protein_Signaling // GenMAPP	gb:NM_010303.1 /DB_XREF=gi:6754007 /GEN=Gna13 /FEA=FLmRNA /CNT=125 /TID=Mm.202311.1 /TIER=FL+Stack /STK=37 /UG=Mm.202311 /LL=14674 /DEF=Mus musculus guanine nucleotide binding protein, alpha 13 (Gna13), mRNA. /PROD=guanine nucleotide binding protein, alpha 13 /FL=gb:M63660.1 gb:NM_010303.1	0.16846	-0.016395	0.53094	0.58084	0.64628	0.16498	0.17094	0.16511	0.057246	-0.06325	-0.26134
1422868_s_at	3	Gda	guanine deaminase	---	---	0005515 // protein binding // inferred from physical interaction /// 0008270 // zinc ion binding // inferred from electronic annotation /// 0008892 // guanine deaminase activity // inferred from electronic annotation /// 0016787 // hydrolase activity // inferred from electronic annotation /// 0046872 // metal ion binding // inferred from electronic annotation	---	gb:NM_010266.1 /DB_XREF=gi:6753959 /GEN=Gda /FEA=FLmRNA /CNT=51 /TID=Mm.45054.1 /TIER=FL+Stack /STK=9 /UG=Mm.45054 /LL=14544 /DEF=Mus musculus guanine deaminase (Gda), mRNA. /PROD=guanine deaminase /FL=gb:AF174583.1 gb:NM_010266.1	-0.030644	0.075791	0.72325	0.98581	0.59977	-0.1175	0.032722	0.097018	0.044002	-0.1915	-0.60757
1423161_s_at	3	Spred1	sprouty protein with EVH-1 domain 1, related sequence	0000188 // inactivation of MAPK activity // inferred from mutant phenotype /// 0007275 // multicellular organismal development // inferred from electronic annotation /// 0009966 // regulation of signal transduction // inferred from electronic annotation	0005634 // nucleus // inferred from electronic annotation /// 0005886 // plasma membrane // inferred from electronic annotation /// 0016020 // membrane // inferred from electronic annotation /// 0019898 // extrinsic to membrane // inferred from electronic annotation	0005173 // stem cell factor receptor binding // inferred from physical interaction /// 0005515 // protein binding // inferred from physical interaction	---	gb:AV295157 /DB_XREF=gi:16392675 /DB_XREF=AV295157 /CLONE=5730432I02 /FEA=FLmRNA /CNT=111 /TID=Mm.39505.1 /TIER=Stack /STK=36 /UG=Mm.39505 /LL=114715 /UG_GENE=Spred1-pending /UG_TITLE=sprouty protein with EVH-1 domain 1, related sequence /FL=gb:NM_033524.1 gb:AB063495.1	0.32033	0.28072	0.51013	0.61515	0.53452	0.44263	0.28115	0.13914	0.2283	-0.0083485	0.029825
1426583_at	3	Atf2	activating transcription factor 2	0006350 // transcription // inferred from electronic annotation /// 0006355 // regulation of transcription, DNA-dependent // inferred from electronic annotation /// 0045449 // regulation of transcription // inferred from electronic annotation	0005622 // intracellular // inferred from electronic annotation /// 0005624 // membrane fraction // inferred from direct assay /// 0005634 // nucleus // not recorded /// 0005634 // nucleus // inferred from electronic annotation	0003677 // DNA binding // inferred from direct assay /// 0003677 // DNA binding // inferred from electronic annotation /// 0003700 // transcription factor activity // not recorded /// 0003700 // transcription factor activity // inferred from electronic annotation /// 0005515 // protein binding // inferred from physical interaction /// 0008270 // zinc ion binding // inferred from electronic annota…	Smooth_muscle_contraction // GenMAPP	gb:BM119623 /DB_XREF=gi:17087649 /DB_XREF=L0928D01-3 /CLONE=L0928D01 /FEA=FLmRNA /CNT=69 /TID=Mm.3466.1 /TIER=ConsEnd /STK=7 /UG=Mm.3466 /LL=11909 /UG_GENE=Atf2 /UG_TITLE=activating transcription factor 2 /FL=gb:AF483483.1 gb:AF483482.1	0.045227	0.2278	0.64297	0.58202	0.57023	-0.007854	-0.12298	-0.051321	0.063425	0.1365	-0.33532
1426597_s_at	3	Iffo2	intermediate filament family orphan 2	---	---	---	---	gb:BG066466 /DB_XREF=gi:12549035 /DB_XREF=H3043C12-3 /CLONE=H3043C12 /FEA=FLmRNA /CNT=28 /TID=Mm.31342.1 /TIER=Stack /STK=11 /UG=Mm.31342 /UG_TITLE=Mus musculus, similar to FLJ00074 protein, clone MGC:36549 IMAGE:4952810, mRNA, complete cds /FL=gb:BC027170.1	0.23761	0.26909	0.51817	0.61189	0.62024	0.21903	0.22547	0.044484	0.15266	0.073524	-0.060377
1426992_at	3	Xpr1	xenotropic and polytropic retrovirus receptor 1	0002553 // histamine secretion by mast cell // inferred from electronic annotation /// 0006605 // protein targeting // inferred from direct assay /// 0006626 // protein targeting to mitochondrion // inferred from electronic annotation /// 0009615 // response to virus // inferred from direct assay /// 0009615 // response to virus // not recorded /// 0042493 // response to drug // inferred from ele…	0005625 // soluble fraction // inferred from electronic annotation /// 0005634 // nucleus // inferred from direct assay /// 0005737 // cytoplasm // inferred from electronic annotation /// 0005739 // mitochondrion // inferred from direct assay /// 0005886 // plasma membrane // inferred from electronic annotation /// 0014069 // postsynaptic density // inferred from electronic annotation /// 0016020…	0004872 // receptor activity // inferred from direct assay /// 0004872 // receptor activity // inferred from electronic annotation /// 0005515 // protein binding // inferred from physical interaction /// 0008134 // transcription factor binding // inferred from electronic annotation /// 0019904 // protein domain specific binding // inferred from direct assay /// 0019904 // protein domain specific …	Calcium_regulation_in_cardiac_cells // GenMAPP /// Smooth_muscle_contraction // GenMAPP	gb:BB667480 /DB_XREF=gi:16398929 /DB_XREF=BB667480 /CLONE=C730016M01 /FEA=mRNA /CNT=136 /TID=Mm.220954.1 /TIER=Stack /STK=28 /UG=Mm.220954 /UG_TITLE=Mus musculus, clone IMAGE:4506466, mRNA	0.013729	-0.057007	0.68336	0.70498	0.68049	0.10117	0.057086	0.057493	0.21746	0.08566	-0.23622
1427195_at	3	---	---	---	---	---	---	gb:W91587 /DB_XREF=gi:1407860 /DB_XREF=MTA.C08.092.A /CLONE=MTA.C08.092 /FEA=mRNA /CNT=20 /TID=Mm.100628.1 /TIER=Stack /STK=10 /UG=Mm.100628 /UG_TITLE=Mus musculus, clone IMAGE:3983419, mRNA	0.31093	0.05811	0.74512	0.65191	0.86782	-0.053626	0.086483	-0.025878	0.40012	0.31794	-0.12273
1427450_x_at	3	Myo1b	myosin IB	---	0016459 // myosin complex // inferred from electronic annotation	0000166 // nucleotide binding // inferred from electronic annotation /// 0003774 // motor activity // inferred from electronic annotation /// 0003779 // actin binding // inferred from electronic annotation /// 0005516 // calmodulin binding // inferred from electronic annotation /// 0005524 // ATP binding // inferred from electronic annotation	---	gb:BI080370 /DB_XREF=gi:14498700 /DB_XREF=602876822F1 /CLONE=IMAGE:5008637 /FEA=mRNA /CNT=46 /TID=Mm.3390.2 /TIER=ConsEnd /STK=0 /UG=Mm.3390 /LL=17912 /UG_GENE=Myo1b /UG_TITLE=myosin Ib	0.20694	0.14279	0.54597	0.67162	0.77542	0.094913	0.014953	0.0092427	0.29216	0.18834	0.13672
1427482_a_at	3	Car8	carbonic anhydrase 8	0006730 // one-carbon metabolic process // inferred from electronic annotation /// 0048015 // phosphoinositide-mediated signaling // inferred from direct assay	0005737 // cytoplasm // inferred from direct assay	0004089 // carbonate dehydratase activity // inferred from electronic annotation /// 0005515 // protein binding // inferred from physical interaction /// 0008270 // zinc ion binding // inferred from electronic annotation /// 0046872 // metal ion binding // inferred from electronic annotation	---	gb:X61397.1 /DB_XREF=gi:50286 /FEA=mRNA /CNT=10 /TID=Mm.156583.2 /TIER=ConsEnd /STK=0 /UG=Mm.156583 /LL=12319 /UG_GENE=Cals1 /DEF=Mouse mRNA for carbonic anhydrase-related polypeptide. /PROD=carbonic anhydrase-related polypeptide	0.23868	0.22772	0.57836	0.51874	0.573	-0.38762	-0.227	-0.338	0.21585	0.60588	0.41689
1428097_at	3	2510009E07Rik	RIKEN cDNA 2510009E07 gene	---	---	---	---	gb:AK010940.1 /DB_XREF=gi:12846727 /FEA=mRNA /CNT=170 /TID=Mm.29294.1 /TIER=Stack /STK=116 /UG=Mm.29294 /LL=72190 /UG_GENE=2510009E07Rik /UG_TITLE=RIKEN cDNA 2510009E07 gene /DEF=Mus musculus 13 days embryo liver cDNA, RIKEN full-length enriched library, clone:2510009E07:hypothetical protein, full insert sequence.	0.26271	0.22835	0.50891	0.76295	0.56171	-0.049699	-0.021915	-0.17548	0.35471	0.24995	0.16957
1428107_at	3	Sh3bgrl	SH3-binding domain glutamic acid-rich protein like	---	---	0017124 // SH3 domain binding // inferred from electronic annotation	---	gb:AK004519.1 /DB_XREF=gi:12835741 /FEA=mRNA /CNT=152 /TID=Mm.21446.1 /TIER=Stack /STK=112 /UG=Mm.21446 /LL=68890 /UG_GENE=1190008F14Rik /UG_TITLE=RIKEN cDNA 1190008F14 gene /DEF=Mus musculus 18 days embryo whole body cDNA, RIKEN full-length enriched library, clone:1190008F14:unclassifiable transcript, full insert sequence.	0.15215	0.10993	0.574	0.66697	0.69379	0.020111	-0.065849	-0.034608	0.009953	0.032723	-0.37809
1428644_at	3	Mgat5	mannoside acetylglucosaminyltransferase 5	0006487 // protein amino acid N-linked glycosylation // inferred from direct assay	0005794 // Golgi apparatus // inferred from electronic annotation /// 0016020 // membrane // inferred from electronic annotation /// 0016021 // integral to membrane // inferred from electronic annotation	0008375 // acetylglucosaminyltransferase activity // inferred from mutant phenotype /// 0016740 // transferase activity // inferred from electronic annotation /// 0016757 // transferase activity, transferring glycosyl groups // inferred from electronic annotation /// 0030144 // alpha-1,6-mannosyl-glycoprotein 6-beta-N-acetylglucosaminyltransferase activity // inferred from electronic annotation	---	gb:AK015544.1 /DB_XREF=gi:12853930 /FEA=mRNA /CNT=79 /TID=Mm.38399.1 /TIER=Stack /STK=22 /UG=Mm.38399 /LL=75810 /UG_GENE=4930471A21Rik /UG_TITLE=RIKEN cDNA 4930471A21 gene /DEF=Mus musculus adult male testis cDNA, RIKEN full-length enriched library, clone:4930471A21:hypothetical protein, full insert sequence.	0.33126	0.10444	0.52964	0.8788	0.66132	-0.012462	-0.10325	-0.0043727	0.20531	-0.011804	-0.14233
1429637_at	3	1110032E23Rik	RIKEN cDNA 1110032E23 gene	---	0005794 // Golgi apparatus // inferred from electronic annotation /// 0016020 // membrane // inferred from electronic annotation /// 0016021 // integral to membrane // inferred from electronic annotation	---	---	gb:AK008987.1 /DB_XREF=gi:12843507 /FEA=mRNA /CNT=17 /TID=Mm.83701.1 /TIER=Stack /STK=12 /UG=Mm.83701 /LL=73663 /UG_GENE=2210419I08Rik /UG_TITLE=RIKEN cDNA 2210419I08 gene /DEF=Mus musculus adult male stomach cDNA, RIKEN full-length enriched library, clone:2210419I08:unclassifiable transcript, full insert sequence.	-0.053118	0.17919	0.67056	0.62228	0.88784	-0.21982	-0.32189	-0.19953	0.47386	0.31559	0.34002
1430526_a_at	3	Smarca2	SWI/SNF related, matrix associated, actin dependent regulator of chromatin, subfamily a, member 2	0006325 // chromatin organization // traceable author statement /// 0006334 // nucleosome assembly // traceable author statement /// 0008285 // negative regulation of cell proliferation // inferred from mutant phenotype /// 0045449 // regulation of transcription // inferred from electronic annotation	0005634 // nucleus // inferred from direct assay /// 0005634 // nucleus // inferred from electronic annotation /// 0016514 // SWI/SNF complex // traceable author statement /// 0016514 // SWI/SNF complex // inferred from electronic annotation	0003676 // nucleic acid binding // inferred from electronic annotation /// 0003677 // DNA binding // inferred from electronic annotation /// 0004386 // helicase activity // inferred from electronic annotation /// 0005515 // protein binding // inferred from physical interaction /// 0005515 // protein binding // inferred from electronic annotation /// 0005524 // ATP binding // inferred from electro…	---	gb:AK011935.1 /DB_XREF=gi:12848364 /FEA=mRNA /CNT=4 /TID=Mm.12184.3 /TIER=ConsEnd /STK=2 /UG=Mm.12184 /LL=67155 /UG_GENE=2610209L14Rik /UG_TITLE=RIKEN cDNA 2610209L14 gene /DEF=Mus musculus 10 days embryo whole body cDNA, RIKEN full-length enriched library, clone:2610209L14:homolog to POSSIBLE GLOBAL TRANSCRIPTION ACTIVATOR SNF2L2 (SNF2-ALPHA), full insert sequence.	0.26137	0.27375	0.73182	0.88215	0.80855	-0.020023	0.12275	-0.00017267	0.23273	0.065247	-0.19719
1434510_at	3	Papss2	3'-phosphoadenosine 5'-phosphosulfate synthase 2	0000103 // sulfate assimilation // inferred from direct assay /// 0000103 // sulfate assimilation // inferred from electronic annotation /// 0007596 // blood coagulation // inferred from mutant phenotype /// 0060348 // bone development // inferred from mutant phenotype	---	0000166 // nucleotide binding // inferred from electronic annotation /// 0003824 // catalytic activity // inferred from electronic annotation /// 0004020 // adenylylsulfate kinase activity // inferred from direct assay /// 0004020 // adenylylsulfate kinase activity // inferred from electronic annotation /// 0004781 // sulfate adenylyltransferase (ATP) activity // inferred from direct assay /// 00…	---	gb:BF780807 /DB_XREF=gi:12085840 /DB_XREF=602103086F1 /CLONE=IMAGE:4221452 /FEA=EST /CNT=63 /TID=Mm.203916.1 /TIER=Stack /STK=30 /UG=Mm.203916 /LL=107125 /UG_GENE=AI159688 /UG_TITLE=expressed sequence AI159688	0.12887	0.1362	0.54554	0.71989	1.0018	-0.17485	-0.07625	-0.13757	0.16068	0.17648	-0.19418
1435046_at	3	---	---	---	---	---	---	gb:BM240223 /DB_XREF=gi:17875493 /DB_XREF=K0548G01-3 /CLONE=K0548G01 /FEA=EST /CNT=25 /TID=Mm.151948.1 /TIER=Stack /STK=21 /UG=Mm.151948 /LL=97753 /UG_GENE=C86807 /UG_TITLE=expressed sequence C86807	0.13448	0.14137	0.53731	0.54501	0.60792	0.41457	0.24054	0.044273	0.082614	0.11209	-0.139
1435662_at	3	Nkap	NFKB activating protein	---	0005634 // nucleus // inferred from electronic annotation /// 0005737 // cytoplasm // inferred from electronic annotation	---	---	gb:BB168118 /DB_XREF=gi:16269154 /DB_XREF=BB168118 /CLONE=A130096L18 /FEA=EST /CNT=21 /TID=Mm.24089.1 /TIER=Stack /STK=14 /UG=Mm.24089 /LL=102860 /UG_GENE=AA987160 /UG_TITLE=expressed sequence AA987160	0.22366	0.11415	0.57532	0.63952	0.5713	0.062578	0.008674	-0.057884	0.11015	0.1036	-0.27391
1435985_at	3	Farp2	FERM, RhoGEF and pleckstrin domain protein 2	0007242 // intracellular signaling cascade // inferred from electronic annotation /// 0016322 // neuron remodeling // not recorded /// 0016322 // neuron remodeling // inferred from electronic annotation /// 0016601 // Rac protein signal transduction // not recorded /// 0016601 // Rac protein signal transduction // inferred from electronic annotation /// 0035023 // regulation of Rho protein signal…	0005622 // intracellular // inferred from electronic annotation /// 0005737 // cytoplasm // not recorded /// 0005737 // cytoplasm // inferred from electronic annotation /// 0005856 // cytoskeleton // inferred from electronic annotation /// 0019898 // extrinsic to membrane // inferred from electronic annotation	0005085 // guanyl-nucleotide exchange factor activity // inferred from electronic annotation /// 0005089 // Rho guanyl-nucleotide exchange factor activity // not recorded /// 0005089 // Rho guanyl-nucleotide exchange factor activity // inferred from electronic annotation /// 0005488 // binding // inferred from electronic annotation /// 0008092 // cytoskeletal protein binding // inferred from elec…	---	gb:BM232304 /DB_XREF=gi:17867574 /DB_XREF=K0321C04-3 /CLONE=K0321C04 /FEA=EST /CNT=13 /TID=Mm.38843.1 /TIER=Stack /STK=12 /UG=Mm.38843 /UG_TITLE=ESTs	0.36484	0.25075	0.51083	0.63938	0.80158	-0.059864	-0.037387	-0.084181	0.3962	0.37057	0.16208
1436431_at	3	1700025G04Rik	RIKEN cDNA 1700025G04 gene	---	---	---	---	gb:AW557527 /DB_XREF=gi:7202956 /DB_XREF=L0283A03-3 /CLONE=L0283A03 /FEA=EST /CNT=14 /TID=Mm.45796.1 /TIER=Stack /STK=9 /UG=Mm.45796 /UG_TITLE=ESTs	0.31592	0.12791	0.73687	0.69913	0.67605	0.032357	0.064827	-0.15176	0.38117	0.24157	0.009439
1436917_s_at	3	Gpsm1	G-protein signalling modulator 1 (AGS3-like, C. elegans)	0007165 // signal transduction // inferred from electronic annotation /// 0007275 // multicellular organismal development // inferred from electronic annotation /// 0007399 // nervous system development // inferred from electronic annotation /// 0008277 // regulation of G-protein coupled receptor protein signaling pathway // inferred from electronic annotation /// 0030154 // cell differentiation …	0005737 // cytoplasm // inferred from electronic annotation /// 0005783 // endoplasmic reticulum // inferred from electronic annotation /// 0005794 // Golgi apparatus // inferred from electronic annotation /// 0005829 // cytosol // inferred from electronic annotation /// 0005886 // plasma membrane // inferred from electronic annotation /// 0016020 // membrane // inferred from electronic annotation	0005096 // GTPase activator activity // inferred from electronic annotation /// 0005488 // binding // inferred from electronic annotation /// 0005515 // protein binding // inferred from electronic annotation	---	gb:BB491018 /DB_XREF=gi:9449645 /DB_XREF=BB491018 /CLONE=D530019B07 /FEA=EST /CNT=36 /TID=Mm.31239.4 /TIER=Stack /STK=36 /UG=Mm.31239 /UG_TITLE=Mus musculus, clone IMAGE:5363182, mRNA, partial cds	0.27368	0.091064	0.6016	0.66407	0.69846	-0.24754	0.032339	-0.014072	0.17105	0.15585	-0.045116
1436997_x_at	3	Sh3bgrl	SH3-binding domain glutamic acid-rich protein like	---	---	0017124 // SH3 domain binding // inferred from electronic annotation	---	gb:BB248904 /DB_XREF=gi:8941650 /DB_XREF=BB248904 /CLONE=A730028P12 /FEA=EST /CNT=31 /TID=Mm.21446.3 /TIER=Stack /STK=31 /UG=Mm.21446 /LL=68890 /UG_GENE=1190008F14Rik /UG_TITLE=RIKEN cDNA 1190008F14 gene	0.18712	0.14296	0.52544	0.63725	0.66042	-0.031105	-0.16325	-0.18855	0.057232	0.020835	-0.33196
1438230_at	3	Pggt1b	protein geranylgeranyltransferase type I, beta subunit	0008284 // positive regulation of cell proliferation // inferred from electronic annotation /// 0034097 // response to cytokine stimulus // inferred from electronic annotation /// 0045787 // positive regulation of cell cycle // inferred from electronic annotation /// 0051774 // negative regulation of nitric-oxide synthase 2 biosynthetic process // inferred from electronic annotation /// 0051789 /…	0005953 // CAAX-protein geranylgeranyltransferase complex // inferred from electronic annotation	0003824 // catalytic activity // inferred from electronic annotation /// 0004659 // prenyltransferase activity // inferred from electronic annotation /// 0004662 // CAAX-protein geranylgeranyltransferase activity // inferred from electronic annotation /// 0005515 // protein binding // inferred from electronic annotation /// 0008144 // drug binding // inferred from electronic annotation /// 000827…	---	gb:BM240147 /DB_XREF=gi:17875417 /DB_XREF=K0547A09-3 /CLONE=K0547A09 /FEA=EST /CNT=54 /TID=Mm.30613.1 /TIER=Stack /STK=9 /UG=Mm.30613 /LL=106919 /UG_GENE=AI551093 /UG_TITLE=expressed sequence AI551093	0.21083	0.052005	0.61546	0.80355	0.58973	0.047459	0.12002	0.021747	0.38724	0.16239	-0.13064
1438349_at	3	Zfp229	zinc finger protein	0006350 // transcription // inferred from electronic annotation /// 0006355 // regulation of transcription, DNA-dependent // inferred from electronic annotation	0005622 // intracellular // inferred from electronic annotation /// 0005634 // nucleus // inferred from electronic annotation	0003676 // nucleic acid binding // inferred from electronic annotation /// 0008270 // zinc ion binding // inferred from electronic annotation /// 0046872 // metal ion binding // inferred from electronic annotation	---	gb:BG069331 /DB_XREF=gi:12551988 /DB_XREF=H3076B09-3 /CLONE=H3076B09 /FEA=EST /CNT=11 /TID=Mm.28736.1 /TIER=Stack /STK=11 /UG=Mm.28736 /UG_TITLE=ESTs	0.27403	0.18557	0.50649	0.66215	0.6841	-0.21091	-0.11964	-0.24772	0.21739	0.13781	-0.019255
1438442_at	3	Sike1	suppressor of IKBKE 1	---	0005737 // cytoplasm // inferred from electronic annotation	---	---	gb:AI450236 /DB_XREF=gi:4295591 /DB_XREF=mt92e09.x1 /CLONE=IMAGE:637384 /FEA=EST /CNT=21 /TID=Mm.33937.1 /TIER=Stack /STK=10 /UG=Mm.33937 /LL=99634 /UG_GENE=AI450236 /UG_TITLE=expressed sequence AI450236	0.31794	0.16026	0.55557	0.79256	0.65794	0.00086583	0.1617	0.067333	0.33613	0.088278	0.046569
1439561_at	3	2010012O05Rik	RIKEN cDNA 2010012O05 gene	---	---	---	---	gb:BB322051 /DB_XREF=gi:15411412 /DB_XREF=BB322051 /CLONE=B330007D01 /FEA=EST /CNT=17 /TID=Mm.23769.1 /TIER=ConsEnd /STK=7 /UG=Mm.23769 /LL=107162 /UG_GENE=AI413851 /UG_TITLE=expressed sequence AI413851	0.20957	0.14919	0.52059	0.93243	0.64767	-0.25951	-0.083216	-0.062821	0.26934	0.13918	-0.12199
1439945_at	3	Zfp449	zinc finger protein 449	0006350 // transcription // inferred from electronic annotation /// 0006355 // regulation of transcription, DNA-dependent // inferred from electronic annotation /// 0045449 // regulation of transcription // inferred from electronic annotation	0005622 // intracellular // inferred from electronic annotation /// 0005634 // nucleus // inferred from electronic annotation	0003676 // nucleic acid binding // inferred from electronic annotation /// 0003700 // transcription factor activity // inferred from electronic annotation /// 0005515 // protein binding // inferred from electronic annotation /// 0008270 // zinc ion binding // inferred from electronic annotation /// 0046872 // metal ion binding // inferred from electronic annotation	---	gb:BE993413 /DB_XREF=gi:10675568 /DB_XREF=UI-M-BZ1-bjs-b-06-0-UI.s1 /CLONE=UI-M-BZ1-bjs-b-06-0-UI /FEA=EST /CNT=7 /TID=Mm.87175.1 /TIER=ConsEnd /STK=6 /UG=Mm.87175 /UG_TITLE=ESTs	0.3833	0.17987	0.52157	0.79622	0.64198	-0.080581	-0.082013	-0.070895	0.28591	0.16479	-0.086983
1439965_at	3	---	---	---	---	---	---	gb:BM933678 /DB_XREF=gi:19392830 /DB_XREF=UI-M-BZ1-bjn-e-07-0-UI.r2 /CLONE=UI-M-BZ1-bjn-e-07-0-UI /FEA=EST /CNT=7 /TID=Mm.22950.1 /TIER=ConsEnd /STK=6 /UG=Mm.22950 /UG_TITLE=ESTs	0.11205	0.14816	0.52053	0.66832	0.60636	0.32669	0.28261	0.20418	-0.019438	-0.071209	-0.25376
1440244_at	3	Erg	avian erythroblastosis virus E-26 (v-ets) oncogene related	0006350 // transcription // inferred from electronic annotation /// 0006355 // regulation of transcription, DNA-dependent // inferred from electronic annotation /// 0045449 // regulation of transcription // inferred from electronic annotation	0005634 // nucleus // inferred from electronic annotation /// 0030529 // ribonucleoprotein complex // inferred from sequence or structural similarity	0003677 // DNA binding // inferred from electronic annotation /// 0003700 // transcription factor activity // inferred from electronic annotation /// 0005515 // protein binding // inferred from physical interaction /// 0005515 // protein binding // inferred from electronic annotation /// 0043565 // sequence-specific DNA binding // inferred from electronic annotation	---	gb:AV329219 /DB_XREF=gi:16396042 /DB_XREF=AV329219 /CLONE=6330501C04 /FEA=EST /CNT=8 /TID=Mm.184118.1 /TIER=ConsEnd /STK=5 /UG=Mm.184118 /UG_TITLE=ESTs	0.21681	0.10448	0.61362	0.76146	0.63834	-0.10968	-0.08539	-0.22799	0.41657	0.15522	-0.067704
1440381_at	3	2410085M17Rik	RIKEN cDNA 2410085M17 gene	---	---	---	---	gb:AI553565 /DB_XREF=gi:4485928 /DB_XREF=vw41f07.x1 /CLONE=IMAGE:1246405 /FEA=EST /CNT=7 /TID=Mm.35117.1 /TIER=ConsEnd /STK=5 /UG=Mm.35117 /UG_TITLE=ESTs	0.34379	0.1114	0.57437	0.74167	0.55017	-0.028586	0.11609	0.025178	0.25246	0.1037	-0.15117
1441930_x_at	3	Vat1	Vesicle amine transport protein 1 homolog (T californica)	0008152 // metabolic process // inferred from electronic annotation /// 0055114 // oxidation reduction // inferred from electronic annotation	---	0003824 // catalytic activity // inferred from electronic annotation /// 0005488 // binding // inferred from electronic annotation /// 0008270 // zinc ion binding // inferred from electronic annotation /// 0016491 // oxidoreductase activity // inferred from electronic annotation	---	gb:BB089991 /DB_XREF=gi:8673238 /DB_XREF=BB089991 /CLONE=9430024J06 /FEA=EST /CNT=4 /TID=Mm.166455.1 /TIER=ConsEnd /STK=4 /UG=Mm.166455 /UG_TITLE=ESTs	0.28641	0.46634	0.61814	0.58078	0.51811	0.19044	0.14096	0.056001	0.14983	-0.10906	-0.20487
1442006_at	3	---	---	---	---	---	---	gb:AW987547 /DB_XREF=gi:8182470 /DB_XREF=uf25h10.x1 /CLONE=IMAGE:1512451 /FEA=EST /CNT=12 /TID=Mm.27091.1 /TIER=ConsEnd /STK=3 /UG=Mm.27091 /UG_TITLE=ESTs	0.35776	0.084599	0.58667	0.56685	0.70718	0.061245	0.18985	-1.63e-05	0.20515	0.076953	-0.11003
1443486_at	3	Cog7	Component of oligomeric golgi complex 7	0006486 // protein amino acid glycosylation // inferred from electronic annotation /// 0006810 // transport // inferred from electronic annotation /// 0006886 // intracellular protein transport // inferred from electronic annotation /// 0006890 // retrograde vesicle-mediated transport, Golgi to ER // inferred from electronic annotation /// 0015031 // protein transport // inferred from electronic …	0005794 // Golgi apparatus // not recorded /// 0005794 // Golgi apparatus // inferred from electronic annotation /// 0016020 // membrane // inferred from electronic annotation /// 0017119 // Golgi transport complex // inferred from electronic annotation /// 0019898 // extrinsic to membrane // inferred from electronic annotation	0005515 // protein binding // inferred from electronic annotation	---	gb:AV294603 /DB_XREF=gi:15405845 /DB_XREF=AV294603 /CLONE=5630400E24 /FEA=EST /CNT=3 /TID=Mm.73775.1 /TIER=ConsEnd /STK=3 /UG=Mm.73775 /UG_TITLE=ESTs, Moderately similar to POL2 MOUSE RETROVIRUS-RELATED POL POLYPROTEIN (M.musculus)	0.26328	0.03769	0.9344	0.97833	0.9231	0.20846	-0.071811	-0.057067	0.23011	0.046301	-0.30249
1444343_at	3	A130064L14Rik	RIKEN cDNA A130064L14 gene	---	---	---	---	gb:BB475564 /DB_XREF=gi:16440038 /DB_XREF=BB475564 /CLONE=D330013M23 /FEA=EST /CNT=4 /TID=Mm.209434.1 /TIER=ConsEnd /STK=2 /UG=Mm.209434 /UG_TITLE=ESTs	0.042845	-0.041964	0.53559	0.80127	0.74038	0.0027717	0.061413	0.1272	0.10044	0.016362	-0.42573
1446669_at	3	---	---	---	---	---	---	gb:BB038386 /DB_XREF=gi:16258485 /DB_XREF=BB038386 /CLONE=5930437D19 /FEA=EST /CNT=2 /TID=Mm.209696.1 /TIER=ConsEnd /STK=2 /UG=Mm.209696 /UG_TITLE=ESTs	0.13424	0.11247	0.16973	0.28289	0.37211	0.59524	0.71084	0.56343	-0.027772	0.047027	-0.041029
1449118_at	3	Dbt	dihydrolipoamide branched chain transacylase E2	0008152 // metabolic process // inferred from electronic annotation /// 0046949 // acyl-CoA biosynthetic process // inferred from electronic annotation	0005739 // mitochondrion // inferred from direct assay /// 0005739 // mitochondrion // inferred from electronic annotation /// 0005759 // mitochondrial matrix // inferred from electronic annotation /// 0042645 // mitochondrial nucleoid // inferred from electronic annotation	0005515 // protein binding // inferred from electronic annotation /// 0008415 // acyltransferase activity // inferred from electronic annotation /// 0016740 // transferase activity // inferred from electronic annotation /// 0031405 // lipoic acid binding // inferred from electronic annotation /// 0043754 // dihydrolipoyllysine-residue (2-methylpropanoyl)transferase activity // inferred from elect…	---	gb:NM_010022.1 /DB_XREF=gi:6753609 /GEN=Dbt /FEA=FLmRNA /CNT=101 /TID=Mm.3636.1 /TIER=FL+Stack /STK=22 /UG=Mm.3636 /LL=13171 /DEF=Mus musculus dihydrolipoamide branched chain transacylase E2 (Dbt), mRNA. /PROD=dihydrolipoamide branched chain transacylase E2 /FL=gb:NM_010022.1 gb:L42996.1	0.19705	0.1337	0.61111	0.88638	0.65012	-0.17214	-0.14516	-0.031704	0.39857	0.1025	-0.33653
1449670_x_at	3	Gpr137b /// LOC100044979	G protein-coupled receptor 137B /// similar to Gpr137b protein	---	0016020 // membrane // inferred from electronic annotation /// 0016021 // integral to membrane // inferred from electronic annotation	---	---	gb:AW546472 /DB_XREF=gi:7191881 /DB_XREF=L0008F12-3 /CLONE=L0008F12 /FEA=EST /CNT=1 /TID=Mm.201472.1 /TIER=ConsEnd /STK=1 /UG=Mm.201472 /LL=105380 /UG_GENE=AW546472 /UG_TITLE=expressed sequence AW546472	0.17056	-0.22081	0.61423	0.51451	0.59356	-0.22114	-0.097973	-0.1699	0.15295	0.1065	0.22271
1450656_at	3	Gna13	guanine nucleotide binding protein, alpha 13	0001525 // angiogenesis // inferred from mutant phenotype /// 0001569 // patterning of blood vessels // inferred from mutant phenotype /// 0001701 // in utero embryonic development // inferred from genetic interaction /// 0007165 // signal transduction // inferred from electronic annotation /// 0007186 // G-protein coupled receptor protein signaling pathway // not recorded /// 0007186 // G-protei…	0005834 // heterotrimeric G-protein complex // not recorded /// 0005834 // heterotrimeric G-protein complex // traceable author statement /// 0005834 // heterotrimeric G-protein complex // inferred from electronic annotation /// 0016020 // membrane // inferred from electronic annotation /// 0031225 // anchored to membrane // inferred from electronic annotation /// 0031526 // brush border membrane…	0000166 // nucleotide binding // inferred from electronic annotation /// 0001664 // G-protein-coupled receptor binding // inferred from electronic annotation /// 0003924 // GTPase activity // not recorded /// 0003924 // GTPase activity // traceable author statement /// 0004871 // signal transducer activity // inferred from electronic annotation /// 0005515 // protein binding // inferred from elec…	G13_Signaling_Pathway // GenMAPP /// G_Protein_Signaling // GenMAPP	gb:NM_010303.1 /DB_XREF=gi:6754007 /GEN=Gna13 /FEA=FLmRNA /CNT=125 /TID=Mm.202311.1 /TIER=FL+Stack /STK=37 /UG=Mm.202311 /LL=14674 /DEF=Mus musculus guanine nucleotide binding protein, alpha 13 (Gna13), mRNA. /PROD=guanine nucleotide binding protein, alpha 13 /FL=gb:M63660.1 gb:NM_010303.1	0.067903	-0.086916	0.87159	0.77506	0.66435	-0.003233	0.27546	0.033096	0.16078	-0.003742	-0.27235
1451236_at	3	Rerg	RAS-like, estrogen-regulated, growth-inhibitor	0007165 // signal transduction // inferred from electronic annotation /// 0007264 // small GTPase mediated signal transduction // inferred from electronic annotation /// 0008285 // negative regulation of cell proliferation // inferred from electronic annotation /// 0009725 // response to hormone stimulus // inferred from electronic annotation /// 0030308 // negative regulation of cell growth // i…	0005622 // intracellular // inferred from electronic annotation /// 0005634 // nucleus // inferred from electronic annotation /// 0005737 // cytoplasm // inferred from electronic annotation /// 0005829 // cytosol // inferred from electronic annotation /// 0016020 // membrane // inferred from electronic annotation	0000166 // nucleotide binding // inferred from electronic annotation /// 0003924 // GTPase activity // inferred from electronic annotation /// 0005525 // GTP binding // inferred from electronic annotation	---	gb:BC026463.1 /DB_XREF=gi:20072307 /FEA=FLmRNA /CNT=68 /TID=Mm.46233.1 /TIER=FL+Stack /STK=54 /UG=Mm.46233 /DEF=Mus musculus, Similar to RAS-like, estrogen-regulated, growth-inhibitor, clone MGC:31467 IMAGE:4483442, mRNA, complete cds. /PROD=Similar to RAS-like, estrogen-regulated,growth-inhibitor /FL=gb:BC026463.1	-0.14549	0.099081	0.64271	0.58265	0.76443	-0.10867	-0.076752	-0.28554	0.24698	0.53288	0.26212
1453230_at	3	Zfp74	zinc finger protein 74	0006350 // transcription // inferred from electronic annotation /// 0006355 // regulation of transcription, DNA-dependent // inferred from electronic annotation /// 0045449 // regulation of transcription // inferred from electronic annotation	0005622 // intracellular // inferred from electronic annotation /// 0005634 // nucleus // inferred from electronic annotation	0003676 // nucleic acid binding // inferred from electronic annotation /// 0003677 // DNA binding // inferred from electronic annotation /// 0008270 // zinc ion binding // inferred from electronic annotation /// 0046872 // metal ion binding // inferred from electronic annotation	---	gb:AK012947.1 /DB_XREF=gi:12850017 /FEA=mRNA /CNT=30 /TID=Mm.132543.1 /TIER=Stack /STK=11 /UG=Mm.132543 /LL=72723 /UG_GENE=2810054M15Rik /UG_TITLE=RIKEN cDNA 2810054M15 gene /DEF=Mus musculus 10, 11 days embryo whole body cDNA, RIKEN full-length enriched library, clone:2810054M15:unclassifiable transcript, full insert sequence.	0.31548	0.26786	0.51287	0.78364	0.68049	-0.011347	-0.028587	-0.014056	0.21436	0.090227	-0.054751
1455425_at	3	Tet1	tet oncogene 1	0055114 // oxidation reduction // inferred from electronic annotation	0005634 // nucleus // inferred from electronic annotation	0003677 // DNA binding // inferred from electronic annotation /// 0005506 // iron ion binding // inferred from electronic annotation /// 0005506 // iron ion binding // inferred from sequence or structural similarity /// 0008270 // zinc ion binding // inferred from electronic annotation /// 0016491 // oxidoreductase activity // inferred from electronic annotation /// 0016702 // oxidoreductase acti…	---	gb:BG071655 /DB_XREF=gi:12554224 /DB_XREF=H3101F07-3 /CLONE=H3101F07 /FEA=EST /CNT=20 /TID=Mm.17774.1 /TIER=Stack /STK=14 /UG=Mm.17774 /UG_TITLE=ESTs	0.23337	0.13075	0.51379	0.51731	0.63632	-0.0018289	-0.012811	-0.093667	0.31842	0.37093	0.044081
1457246_at	3	Fam160b2	family with sequence similarity 160, member B2	---	---	---	---	gb:AU040322 /DB_XREF=gi:3954142 /DB_XREF=AU040322 /CLONE=J0804A09 /FEA=EST /CNT=5 /TID=Mm.17536.1 /TIER=ConsEnd /STK=5 /UG=Mm.17536 /UG_TITLE=ESTs	0.16036	-0.04783	0.59672	0.63864	0.56886	0.044941	-0.058685	0.061952	0.16062	0.10082	-0.23328
1457392_at	3	---	---	---	---	---	---	gb:BB055966 /DB_XREF=gi:15404179 /DB_XREF=BB055966 /CLONE=6720485M11 /FEA=EST /CNT=5 /TID=Mm.204690.1 /TIER=ConsEnd /STK=4 /UG=Mm.204690 /UG_TITLE=ESTs	0.3035	0.1524	0.52078	0.62763	0.66094	-0.031747	0.067098	-0.0062047	0.11546	0.13744	-0.085604
1416473_a_at	4	Igdcc4	immunoglobulin superfamily, DCC subclass, member 4	---	0005886 // plasma membrane // inferred from electronic annotation /// 0005887 // integral to plasma membrane // not recorded /// 0016020 // membrane // inferred from electronic annotation /// 0016021 // integral to membrane // inferred from electronic annotation	---	---	gb:NM_020043.1 /DB_XREF=gi:9910463 /GEN=Nope /FEA=FLmRNA /CNT=107 /TID=Mm.143741.1 /TIER=FL+Stack /STK=87 /UG=Mm.143741 /LL=56741 /DEF=Mus musculus neighbor of Punc E11 (Nope), mRNA. /PROD=neighbor of Punc e11 protein /FL=gb:AF176694.1 gb:AB052621.1 gb:AB052620.1 gb:NM_020043.1	0.79058	0.5351	0.67875	0.83022	1.1831	-0.050973	0.0263	-0.17358	0.70473	0.39428	0.26998
1417818_at	4	Wwtr1	WW domain containing transcription regulator 1	0000122 // negative regulation of transcription from RNA polymerase II promoter // inferred from genetic interaction /// 0001649 // osteoblast differentiation // inferred from genetic interaction /// 0001649 // osteoblast differentiation // inferred from mutant phenotype /// 0006350 // transcription // inferred from electronic annotation /// 0032835 // glomerulus development // inferred from muta…	0005634 // nucleus // inferred from direct assay /// 0005634 // nucleus // inferred from sequence or structural similarity /// 0005634 // nucleus // inferred from electronic annotation /// 0005667 // transcription factor complex // inferred from direct assay /// 0005737 // cytoplasm // inferred from direct assay /// 0005737 // cytoplasm // inferred from electronic annotation	0003713 // transcription coactivator activity // inferred from direct assay /// 0003714 // transcription corepressor activity // inferred from genetic interaction /// 0005515 // protein binding // inferred from physical interaction /// 0005515 // protein binding // inferred from electronic annotation /// 0030528 // transcription regulator activity // inferred from direct assay /// 0042802 // iden…	---	gb:BB535786 /DB_XREF=gi:16446589 /DB_XREF=BB535786 /CLONE=E030045N14 /FEA=FLmRNA /CNT=274 /TID=Mm.28060.1 /TIER=Stack /STK=43 /UG=Mm.28060 /LL=97064 /UG_GENE=2310058J06Rik /UG_TITLE=RIKEN cDNA 2310058J06 gene /FL=gb:BC014727.1 gb:BC004640.1 gb:NM_133784.1	0.62004	0.76546	0.69988	1.1679	1.1545	0.11758	0.011545	0.022007	0.71806	0.5562	0.31603
1417836_at	4	Gpx7	glutathione peroxidase 7	0006979 // response to oxidative stress // inferred from electronic annotation /// 0055114 // oxidation reduction // inferred from electronic annotation	0005576 // extracellular region // inferred from electronic annotation	0004601 // peroxidase activity // inferred from electronic annotation /// 0004602 // glutathione peroxidase activity // inferred from electronic annotation /// 0016491 // oxidoreductase activity // inferred from electronic annotation	---	gb:NM_024198.1 /DB_XREF=gi:13195625 /GEN=3110050F08Rik /FEA=FLmRNA /CNT=60 /TID=Mm.20164.1 /TIER=FL+Stack /STK=35 /UG=Mm.20164 /LL=67305 /DEF=Mus musculus RIKEN cDNA 3110050F08 gene (3110050F08Rik), mRNA. /PROD=RIKEN cDNA 3110050F08 /FL=gb:BC003228.1 gb:NM_024198.1	0.55476	0.74097	0.62664	1.2803	1.0716	-0.15206	0.070425	-0.046545	0.51298	0.42712	0.39657
1418538_at	4	Kdelr3	KDEL (Lys-Asp-Glu-Leu) endoplasmic reticulum protein retention receptor 3	0006621 // protein retention in ER lumen // inferred from electronic annotation /// 0006810 // transport // inferred from electronic annotation /// 0015031 // protein transport // inferred from electronic annotation /// 0016192 // vesicle-mediated transport // inferred from electronic annotation	0005783 // endoplasmic reticulum // inferred from electronic annotation /// 0016020 // membrane // inferred from electronic annotation /// 0016021 // integral to membrane // inferred from electronic annotation	0004872 // receptor activity // inferred from electronic annotation /// 0046923 // ER retention sequence binding // inferred from electronic annotation	---	gb:NM_134090.1 /DB_XREF=gi:19527315 /GEN=AI173274 /FEA=FLmRNA /CNT=45 /TID=Mm.29644.1 /TIER=FL+Stack /STK=22 /UG=Mm.29644 /LL=105785 /DEF=Mus musculus expressed sequence AI173274 (AI173274), mRNA. /PROD=expressed sequence AI173274 /FL=gb:BC011472.1 gb:BC024420.1 gb:NM_134090.1	0.54004	0.55769	0.68624	1.0507	1.2491	0.014895	0.022292	-0.084399	0.59577	0.40391	0.337
1419693_at	4	Colec12	collectin sub-family member 12	0006910 // phagocytosis, recognition // inferred from sequence or structural similarity /// 0006910 // phagocytosis, recognition // inferred from electronic annotation /// 0006955 // immune response // inferred from direct assay	0016020 // membrane // inferred from electronic annotation /// 0016021 // integral to membrane // inferred from sequence or structural similarity /// 0016021 // integral to membrane // inferred from electronic annotation	0004872 // receptor activity // inferred from electronic annotation /// 0005488 // binding // inferred from electronic annotation /// 0005509 // calcium ion binding // inferred from electronic annotation /// 0005529 // sugar binding // inferred from sequence or structural similarity /// 0005529 // sugar binding // inferred from electronic annotation /// 0008329 // pattern recognition receptor act…	---	gb:NM_130449.1 /DB_XREF=gi:18485493 /GEN=Colec12 /FEA=FLmRNA /CNT=33 /TID=Mm.218571.1 /TIER=FL /STK=7 /UG=Mm.218571 /LL=140792 /DEF=Mus musculus collectin sub-family member 12 (Colec12), mRNA. /PROD=collectin sub-family member 12 /FL=gb:NM_130449.1 gb:AB038519.1	0.64214	0.54385	0.44663	0.89767	0.54679	0.12305	-0.007519	-0.15863	0.51119	0.33623	0.30893
1420514_at	4	---	---	---	---	---	---	gb:AI505784 /DB_XREF=gi:4403635 /DB_XREF=vi40g05.x1 /CLONE=IMAGE:906296 /FEA=FLmRNA /CNT=77 /TID=Mm.154610.1 /TIER=Stack /STK=12 /UG=Mm.154610 /LL=192216 /UG_GENE=Tm4sf10 /UG_TITLE=transmembrane 4 superfamily member 10 /FL=gb:BC019751.1 gb:NM_138751.1	0.6138	0.52082	0.50163	0.83327	1.1032	0.020098	-0.043312	-0.11188	0.41723	0.35594	0.18544
1422587_at	4	Tmem45a	transmembrane protein 45a	---	0005887 // integral to plasma membrane // inferred from sequence or structural similarity /// 0016020 // membrane // inferred from electronic annotation /// 0016021 // integral to membrane // inferred from electronic annotation	---	---	gb:NM_019631.1 /DB_XREF=gi:9790138 /GEN=M32486 /FEA=FLmRNA /CNT=43 /TID=Mm.4992.1 /TIER=FL+Stack /STK=31 /UG=Mm.4992 /LL=56277 /DEF=Mus musculus Mouse 19.5 mRNA (M32486), mRNA. /PROD=Mouse 19.5 mRNA /FL=gb:NM_019631.1 gb:M32486.1	0.48298	0.79797	0.6957	1.1619	1.1925	0.075743	0.13801	0.12063	0.60506	0.60227	0.39832
1423771_at	4	Prkcdbp	protein kinase C, delta binding protein	---	---	0005080 // protein kinase C binding // inferred from electronic annotation /// 0005080 // protein kinase C binding // inferred from physical interaction	---	gb:BC009660.1 /DB_XREF=gi:16307145 /FEA=FLmRNA /CNT=159 /TID=Mm.3124.1 /TIER=FL+Stack /STK=117 /UG=Mm.3124 /LL=73128 /UG_GENE=3110015B12Rik /DEF=Mus musculus, clone MGC:6598 IMAGE:3486461, mRNA, complete cds. /PROD=Unknown (protein for MGC:6598) /FL=gb:BC009660.1	0.65543	0.77415	0.50137	0.91724	0.67575	0.088292	0.16294	0.0086873	0.51884	0.42835	0.50257
1424099_at	4	Gpx8	glutathione peroxidase 8 (putative)	0006979 // response to oxidative stress // inferred from electronic annotation /// 0055114 // oxidation reduction // inferred from electronic annotation	0016020 // membrane // inferred from electronic annotation /// 0016021 // integral to membrane // inferred from electronic annotation	0004601 // peroxidase activity // inferred from electronic annotation /// 0004602 // glutathione peroxidase activity // inferred from electronic annotation /// 0016491 // oxidoreductase activity // inferred from electronic annotation	---	gb:BC019664.1 /DB_XREF=gi:18044309 /FEA=FLmRNA /CNT=67 /TID=Mm.12715.1 /TIER=FL+Stack /STK=54 /UG=Mm.12715 /LL=69590 /UG_GENE=2310016C16Rik /DEF=Mus musculus, RIKEN cDNA 2310016C16 gene, clone MGC:30772 IMAGE:3988837, mRNA, complete cds. /PROD=RIKEN cDNA 2310016C16 gene /FL=gb:BC019664.1	0.55168	0.64601	0.41242	0.89275	0.91488	-0.032521	-0.12647	-0.006161	0.62234	0.42983	0.44278
1426782_at	4	Gpr125	G protein-coupled receptor 125	0007165 // signal transduction // inferred from electronic annotation /// 0007166 // cell surface receptor linked signal transduction // inferred from electronic annotation /// 0007186 // G-protein coupled receptor protein signaling pathway // inferred from electronic annotation /// 0007218 // neuropeptide signaling pathway // inferred from electronic annotation	0005886 // plasma membrane // inferred from electronic annotation /// 0009897 // external side of plasma membrane // inferred from direct assay /// 0016020 // membrane // inferred from electronic annotation /// 0016021 // integral to membrane // inferred from electronic annotation	0004871 // signal transducer activity // inferred from electronic annotation /// 0004872 // receptor activity // inferred from electronic annotation /// 0004888 // transmembrane receptor activity // inferred from electronic annotation /// 0004930 // G-protein coupled receptor activity // inferred from electronic annotation /// 0005515 // protein binding // inferred from electronic annotation	---	gb:BC019649.1 /DB_XREF=gi:18044315 /FEA=mRNA /CNT=100 /TID=Mm.18062.1 /TIER=Stack /STK=68 /UG=Mm.18062 /LL=100857 /UG_GENE=AU044632 /DEF=Mus musculus, clone IMAGE:3994416, mRNA, partial cds. /PROD=Unknown (protein for IMAGE:3994416)	0.48559	0.53088	0.54149	1.0753	0.8707	-0.22128	0.0824	-0.05559	0.63168	0.44041	0.42665
1427277_at	4	Six1	sine oculis-related homeobox 1 homolog (Drosophila)	0001657 // ureteric bud development // inferred from genetic interaction /// 0001657 // ureteric bud development // inferred from mutant phenotype /// 0001658 // branching involved in ureteric bud morphogenesis // inferred from genetic interaction /// 0001759 // induction of an organ // inferred from mutant phenotype /// 0006350 // transcription // inferred from electronic annotation /// 0006355 …	0005634 // nucleus // inferred from direct assay /// 0005634 // nucleus // inferred from electronic annotation /// 0005667 // transcription factor complex // inferred from direct assay /// 0005730 // nucleolus // inferred from electronic annotation /// 0005737 // cytoplasm // inferred from electronic annotation	0003677 // DNA binding // inferred from electronic annotation /// 0003700 // transcription factor activity // inferred from direct assay /// 0003700 // transcription factor activity // inferred from electronic annotation /// 0005515 // protein binding // inferred from physical interaction /// 0005515 // protein binding // inferred from electronic annotation /// 0030528 // transcription regulator …	---	gb:BB137929 /DB_XREF=gi:8792866 /DB_XREF=BB137929 /CLONE=9830145A18 /FEA=mRNA /CNT=76 /TID=Mm.4645.1 /TIER=Stack /STK=15 /UG=Mm.4645 /LL=20471 /UG_GENE=Six1 /UG_TITLE=sine oculis-related homeobox 1 homolog (Drosophila)	0.57131	0.42724	0.45089	0.85809	0.69339	-0.43463	0.034653	-0.25244	0.63152	0.27862	0.39479
1431424_at	4	2810055G20Rik	RIKEN cDNA 2810055G20 gene	---	---	---	---	gb:AK021336.1 /DB_XREF=gi:12862196 /FEA=mRNA /CNT=3 /TID=Mm.169686.1 /TIER=ConsEnd /STK=0 /UG=Mm.169686 /LL=77994 /UG_GENE=D730043B02Rik /UG_TITLE=RIKEN cDNA D730043B02 gene /DEF=Mus musculus 10 days lactation, adult female mammary gland cDNA, RIKEN full-length enriched library, clone:D730043B02:unclassifiable, full insert sequence.	0.56759	0.41726	0.63645	1.1238	1.0591	0.11265	0.11518	0.2108	0.58029	0.4855	0.23401
1434286_at	4	Trps1	trichorhinophalangeal syndrome I (human)	0006350 // transcription // inferred from electronic annotation /// 0006355 // regulation of transcription, DNA-dependent // inferred from electronic annotation /// 0045449 // regulation of transcription // inferred from electronic annotation /// 0045892 // negative regulation of transcription, DNA-dependent // inferred from physical interaction	0005622 // intracellular // inferred from electronic annotation /// 0005634 // nucleus // inferred by curator /// 0005634 // nucleus // inferred from electronic annotation	0003677 // DNA binding // inferred from electronic annotation /// 0003700 // transcription factor activity // inferred from electronic annotation /// 0005515 // protein binding // inferred from physical interaction /// 0008270 // zinc ion binding // inferred from electronic annotation /// 0016564 // transcription repressor activity // inferred from physical interaction /// 0043565 // sequence-spe…	---	gb:BQ176054 /DB_XREF=gi:20351546 /DB_XREF=UI-M-DJ2-bwf-o-12-0-UI.s1 /CLONE=UI-M-DJ2-bwf-o-12-0-UI /FEA=EST /CNT=72 /TID=Mm.22380.1 /TIER=Stack /STK=36 /UG=Mm.22380 /LL=105778 /UG_GENE=AI115454 /UG_TITLE=expressed sequence AI115454	0.609	0.74788	0.68655	1.0251	1.0779	0.03311	0.1142	0.066137	0.5665	0.49595	0.44679
1436413_at	4	Frk	fyn-related kinase	0006468 // protein amino acid phosphorylation // inferred from electronic annotation /// 0030154 // cell differentiation // inferred from electronic annotation	0005622 // intracellular // inferred from electronic annotation /// 0005737 // cytoplasm // inferred from electronic annotation	0000166 // nucleotide binding // inferred from electronic annotation /// 0004672 // protein kinase activity // inferred from electronic annotation /// 0004713 // protein tyrosine kinase activity // inferred from electronic annotation /// 0004715 // non-membrane spanning protein tyrosine kinase activity // inferred from electronic annotation /// 0005515 // protein binding // inferred from electron…	---	gb:BB831042 /DB_XREF=gi:17009285 /DB_XREF=BB831042 /CLONE=G930014O13 /FEA=EST /CNT=12 /TID=Mm.35407.1 /TIER=Stack /STK=9 /UG=Mm.35407 /UG_TITLE=ESTs, Weakly similar to SINGLE-STRAND RECOGNITION PROTEIN (D.melanogaster)	0.64318	0.43241	0.61447	1.1584	1.0725	-0.092868	0.084401	-0.29979	0.80972	0.36624	0.57116
1436420_a_at	4	Ipo4	importin 4	0000059 // protein import into nucleus, docking // inferred from electronic annotation /// 0006610 // ribosomal protein import into nucleus // not recorded /// 0006810 // transport // inferred from electronic annotation /// 0006886 // intracellular protein transport // inferred from electronic annotation /// 0015031 // protein transport // inferred from electronic annotation /// 0042254 // riboso…	0005634 // nucleus // inferred from electronic annotation /// 0005643 // nuclear pore // inferred from electronic annotation /// 0005737 // cytoplasm // inferred from electronic annotation	0005488 // binding // inferred from electronic annotation /// 0005515 // protein binding // inferred from physical interaction /// 0008565 // protein transporter activity // inferred from electronic annotation	---	gb:BB390936 /DB_XREF=gi:9113881 /DB_XREF=BB390936 /CLONE=C230071O04 /FEA=EST /CNT=11 /TID=Mm.27546.5 /TIER=Stack /STK=9 /UG=Mm.27546 /LL=75751 /UG_GENE=8430408O15Rik /UG_TITLE=RIKEN cDNA 8430408O15 gene	0.7712	0.31856	0.36016	0.86275	0.65963	-0.22171	-0.16022	-0.38262	0.53337	0.29018	0.21348
1436566_at	4	Rab40b	Rab40b, member RAS oncogene family	0007242 // intracellular signaling cascade // inferred from electronic annotation /// 0007264 // small GTPase mediated signal transduction // inferred from electronic annotation /// 0015031 // protein transport // inferred from electronic annotation /// 0019941 // modification-dependent protein catabolic process // inferred from electronic annotation	0005886 // plasma membrane // inferred from electronic annotation /// 0016020 // membrane // inferred from electronic annotation	0000166 // nucleotide binding // inferred from electronic annotation /// 0005525 // GTP binding // inferred from electronic annotation	---	gb:AV364488 /DB_XREF=gi:16397612 /DB_XREF=AV364488 /CLONE=8230402D24 /FEA=EST /CNT=12 /TID=Mm.24511.2 /TIER=Stack /STK=8 /UG=Mm.24511 /LL=217371 /UG_GENE=RAB40B /UG_TITLE=RAR SOCS box containing protein	0.81361	0.16758	0.35574	0.56211	0.53428	-0.25845	-0.38593	-0.53163	0.61598	0.43464	0.3481
1436678_at	4	Sgcb	sarcoglycan, beta (dystrophin-associated glycoprotein)	0007010 // cytoskeleton organization // inferred from electronic annotation /// 0016044 // membrane organization // traceable author statement	0005737 // cytoplasm // inferred from electronic annotation /// 0005856 // cytoskeleton // inferred from electronic annotation /// 0005886 // plasma membrane // inferred from electronic annotation /// 0005887 // integral to plasma membrane // traceable author statement /// 0016012 // sarcoglycan complex // inferred from electronic annotation /// 0016020 // membrane // inferred from electronic ann…	---	---	gb:AI844814 /DB_XREF=gi:5488760 /DB_XREF=UI-M-AH1-agx-f-12-0-UI.s1 /CLONE=UI-M-AH1-agx-f-12-0-UI /FEA=EST /CNT=8 /TID=Mm.200820.1 /TIER=Stack /STK=8 /UG=Mm.200820 /LL=100745 /UG_GENE=AI844814 /UG_TITLE=expressed sequence AI844814	0.83822	0.46818	0.67297	1.0736	0.80525	-0.31735	-0.12435	-0.32754	0.98456	0.52176	0.51335
1437671_x_at	4	Prss23	protease, serine, 23	0006508 // proteolysis // inferred from electronic annotation	0005576 // extracellular region // inferred from electronic annotation /// 0005634 // nucleus // inferred from electronic annotation	0003824 // catalytic activity // inferred from electronic annotation /// 0004252 // serine-type endopeptidase activity // inferred from electronic annotation /// 0008233 // peptidase activity // inferred from electronic annotation /// 0008236 // serine-type peptidase activity // inferred from electronic annotation /// 0016787 // hydrolase activity // inferred from electronic annotation	---	gb:BB378796 /DB_XREF=gi:9091674 /DB_XREF=BB378796 /CLONE=C130095M22 /FEA=EST /CNT=17 /TID=Mm.22345.5 /TIER=Stack /STK=15 /UG=Mm.22345 /LL=76453 /UG_GENE=2310046G15Rik /UG_TITLE=RIKEN cDNA 2310046G15 gene	0.63801	0.57666	0.73291	1.2501	1.4543	-0.041416	-0.069243	0.13005	0.72997	0.48276	0.11987
1438081_at	4	Mcc	mutated in colorectal cancers	---	---	0005509 // calcium ion binding // inferred from electronic annotation	---	gb:BB794635 /DB_XREF=gi:16964254 /DB_XREF=BB794635 /CLONE=G431001D24 /FEA=EST /CNT=15 /TID=Mm.210479.1 /TIER=Stack /STK=12 /UG=Mm.210479 /UG_TITLE=ESTs	0.72554	0.49163	0.54371	1.0274	0.79398	-0.16322	0.0004125	-0.10884	0.58484	0.42811	0.29608
1439078_at	4	Klhl4	kelch-like 4 (Drosophila)	---	---	0005515 // protein binding // inferred from electronic annotation	---	gb:BB037068 /DB_XREF=gi:15403720 /DB_XREF=BB037068 /CLONE=5930422O20 /FEA=EST /CNT=19 /TID=Mm.132583.1 /TIER=Stack /STK=8 /UG=Mm.132583 /UG_TITLE=ESTs, Moderately similar to KHL1_MOUSE Kelch-like protein 1 (M.musculus)	0.61058	0.4711	0.70543	0.94773	1.2383	-0.041907	-0.052442	0.11299	0.57113	0.093324	0.23381
1439827_at	4	Adamts12	a disintegrin-like and metallopeptidase (reprolysin type) with thrombospondin type 1 motif, 12	0006508 // proteolysis // inferred from electronic annotation	0005576 // extracellular region // inferred from electronic annotation /// 0005578 // proteinaceous extracellular matrix // inferred from electronic annotation /// 0031012 // extracellular matrix // inferred from electronic annotation	0004222 // metalloendopeptidase activity // inferred from electronic annotation /// 0008233 // peptidase activity // inferred from electronic annotation /// 0008237 // metallopeptidase activity // inferred from electronic annotation /// 0008270 // zinc ion binding // inferred from electronic annotation /// 0016787 // hydrolase activity // inferred from electronic annotation /// 0046872 // metal i…	---	gb:BB004039 /DB_XREF=gi:15389655 /DB_XREF=BB004039 /CLONE=4732458B12 /FEA=EST /CNT=9 /TID=Mm.37798.1 /TIER=ConsEnd /STK=6 /UG=Mm.37798 /LL=105878 /UG_GENE=AI605170 /UG_TITLE=expressed sequence AI605170	0.62972	0.48424	0.85459	1.151	1.2925	0.073557	0.091189	-0.034895	0.47768	0.41165	0.16711
1440884_s_at	4	A530047J11Rik	RIKEN cDNA A530047J11 gene	---	---	---	---	gb:BB218047 /DB_XREF=gi:16353255 /DB_XREF=BB218047 /CLONE=A530047J11 /FEA=EST /CNT=12 /TID=Mm.34175.1 /TIER=ConsEnd /STK=4 /UG=Mm.34175 /LL=103767 /UG_GENE=AI504364 /UG_TITLE=expressed sequence AI504364	0.69266	0.53092	0.15556	0.68981	0.62044	-0.31729	-0.13258	-0.37505	0.76658	0.51564	0.47406
1443770_x_at	4	---	---	---	---	---	---	gb:BB026407 /DB_XREF=gi:8202475 /DB_XREF=BB026407 /CLONE=5330432O04 /FEA=EST /CNT=3 /TID=Mm.127920.1 /TIER=ConsEnd /STK=3 /UG=Mm.127920 /UG_TITLE=ESTs	0.67161	0.6214	0.6889	1.0568	1.0557	-0.089561	0.066537	-0.16153	0.64503	0.52831	0.40819
1448383_at	4	Mmp14	matrix metallopeptidase 14 (membrane-inserted)	0001503 // ossification // inferred from electronic annotation /// 0001525 // angiogenesis // inferred from electronic annotation /// 0001541 // ovarian follicle development // inferred from electronic annotation /// 0001666 // response to hypoxia // inferred from electronic annotation /// 0001935 // endothelial cell proliferation // inferred from electronic annotation /// 0006508 // proteolysis …	0005578 // proteinaceous extracellular matrix // inferred from electronic annotation /// 0005737 // cytoplasm // inferred from electronic annotation /// 0016020 // membrane // inferred from electronic annotation /// 0016021 // integral to membrane // inferred from electronic annotation /// 0042470 // melanosome // inferred from electronic annotation	0004222 // metalloendopeptidase activity // inferred from electronic annotation /// 0005509 // calcium ion binding // inferred from electronic annotation /// 0005515 // protein binding // inferred from electronic annotation /// 0008233 // peptidase activity // inferred from electronic annotation /// 0008237 // metallopeptidase activity // inferred from electronic annotation /// 0008270 // zinc io…	Matrix_Metalloproteinases // GenMAPP	gb:NM_008608.1 /DB_XREF=gi:6678897 /GEN=Mmp14 /FEA=FLmRNA /CNT=233 /TID=Mm.19945.1 /TIER=FL+Stack /STK=81 /UG=Mm.19945 /LL=17387 /DEF=Mus musculus matrix metalloproteinase 14 (membrane-inserted) (Mmp14), mRNA. /PROD=matrix metalloproteinase 14 (membrane-inserted) /FL=gb:U54984.1 gb:NM_008608.1	0.46892	0.78808	0.69599	1.1989	1.2779	0.14374	0.027192	0.01546	0.60539	0.47325	0.40055
1448557_at	4	Fam13c	family with sequence similarity 13, member C	---	---	---	---	gb:NM_024244.1 /DB_XREF=gi:13195661 /GEN=1200015N20Rik /FEA=FLmRNA /CNT=90 /TID=Mm.19825.1 /TIER=FL+Stack /STK=59 /UG=Mm.19825 /LL=71721 /DEF=Mus musculus RIKEN cDNA 1200015N20 gene (1200015N20Rik), mRNA. /PROD=RIKEN cDNA 1200015N20 /FL=gb:BC003231.1 gb:NM_024244.1	0.72287	0.69387	0.62335	0.7972	1.0439	-0.09488	0.051421	-0.24277	0.58438	0.30655	-0.071015
1448665_at	4	Dmd	dystrophin, muscular dystrophy	0007517 // muscle organ development // inferred from mutant phenotype /// 0007519 // skeletal muscle tissue development // inferred from genetic interaction /// 0007519 // skeletal muscle tissue development // inferred from mutant phenotype /// 0043043 // peptide biosynthetic process // inferred from electronic annotation /// 0045213 // neurotransmitter receptor metabolic process // inferred from…	0005626 // insoluble fraction // inferred from direct assay /// 0005634 // nucleus // inferred from electronic annotation /// 0005737 // cytoplasm // inferred from electronic annotation /// 0005792 // microsome // inferred from direct assay /// 0005856 // cytoskeleton // inferred from electronic annotation /// 0005886 // plasma membrane // inferred from direct assay /// 0005886 // plasma membrane…	0003779 // actin binding // inferred from electronic annotation /// 0005509 // calcium ion binding // inferred from electronic annotation /// 0005515 // protein binding // inferred from physical interaction /// 0005515 // protein binding // inferred from electronic annotation /// 0008270 // zinc ion binding // inferred from electronic annotation /// 0030165 // PDZ domain binding // inferred from …	Striated_muscle_contraction // GenMAPP	gb:NM_007868.1 /DB_XREF=gi:6681202 /GEN=Dmd /FEA=FLmRNA /CNT=84 /TID=Mm.742.1 /TIER=FL+Stack /STK=49 /UG=Mm.742 /LL=13405 /DEF=Mus musculus dystrophin, muscular dystrophy (Dmd), mRNA. /PROD=dystrophin, muscular dystrophy /FL=gb:NM_007868.1 gb:M68859.1	0.56709	0.34711	0.73558	0.95507	0.72502	-0.14472	-0.018113	-0.19098	0.98265	0.61031	0.26166
1448933_at	4	Pcdhb17	protocadherin beta 17	0007155 // cell adhesion // inferred from electronic annotation /// 0007156 // homophilic cell adhesion // inferred from electronic annotation	0016020 // membrane // inferred from electronic annotation /// 0016021 // integral to membrane // inferred from electronic annotation	0005509 // calcium ion binding // inferred from electronic annotation /// 0005515 // protein binding // inferred from electronic annotation	---	gb:NM_053142.1 /DB_XREF=gi:18087794 /GEN=Pcdhb17 /FEA=FLmRNA /CNT=42 /TID=Mm.87553.1 /TIER=FL+Stack /STK=31 /UG=Mm.87553 /LL=93888 /DEF=Mus musculus protocadherin beta 17 (Pcdhb17), mRNA. /PROD=protocadherin beta 17 /FL=gb:AF326310.1 gb:NM_053142.1 gb:BC017149.1 gb:AY013778.1	0.63088	0.58717	0.65305	1.1473	0.93862	0.022673	0.062442	0.057995	0.66265	0.45204	0.5472
1449632_s_at	4	Fkbp10	FK506 binding protein 10	0006457 // protein folding // inferred from electronic annotation	0005783 // endoplasmic reticulum // inferred from electronic annotation /// 0005788 // endoplasmic reticulum lumen // inferred from electronic annotation	0003755 // peptidyl-prolyl cis-trans isomerase activity // inferred from electronic annotation /// 0005509 // calcium ion binding // inferred from electronic annotation /// 0005515 // protein binding // inferred from physical interaction /// 0016853 // isomerase activity // inferred from electronic annotation	---	gb:AI325255 /DB_XREF=gi:4059684 /DB_XREF=ms40a11.x1 /CLONE=IMAGE:614012 /FEA=EST /CNT=1 /TID=Mm.200045.1 /TIER=ConsEnd /STK=1 /UG=Mm.200045 /LL=103691 /UG_GENE=AI325255 /UG_TITLE=expressed sequence AI325255	0.47569	0.54336	0.62023	1.0169	1.0099	-0.13278	0.045966	-0.18131	0.5625	0.29982	0.17786
1450734_at	4	Sec16b	SEC16 homolog B (S. cerevisiae)	0006810 // transport // inferred from electronic annotation /// 0015031 // protein transport // inferred from electronic annotation /// 0016192 // vesicle-mediated transport // inferred from electronic annotation	0005783 // endoplasmic reticulum // inferred from electronic annotation /// 0005794 // Golgi apparatus // inferred from electronic annotation /// 0016020 // membrane // inferred from electronic annotation /// 0019898 // extrinsic to membrane // inferred from electronic annotation	---	---	gb:NM_033354.1 /DB_XREF=gi:15375333 /GEN=Rgpr-pending /FEA=FLmRNA /CNT=36 /TID=Mm.87114.1 /TIER=FL+Stack /STK=15 /UG=Mm.87114 /LL=89867 /DEF=Mus musculus regucalcin gene promotor region related protein (Rgpr-pending), mRNA. /PROD=regucalcin gene promotor region related protein /FL=gb:NM_033354.1 gb:AB063356.1	0.43822	0.50364	0.62421	0.91918	0.92229	0.055363	0.0072077	-0.0054553	0.56509	0.36121	0.26453
1454997_at	4	Msrb3	methionine sulfoxide reductase B3	0030091 // protein repair // inferred from sequence or structural similarity /// 0055114 // oxidation reduction // inferred from electronic annotation	0005739 // mitochondrion // inferred from direct assay /// 0005739 // mitochondrion // not recorded /// 0005739 // mitochondrion // inferred from electronic annotation /// 0005783 // endoplasmic reticulum // inferred from sequence or structural similarity	0000318 // protein-methionine-R-oxide reductase activity // inferred from sequence or structural similarity /// 0008113 // peptide-methionine-(S)-S-oxide reductase activity // inferred from electronic annotation /// 0008270 // zinc ion binding // inferred from sequence or structural similarity /// 0008270 // zinc ion binding // inferred from electronic annotation /// 0016491 // oxidoreductase act…	---	gb:AV286522 /DB_XREF=gi:15405795 /DB_XREF=AV286522 /CLONE=5031424K13 /FEA=EST /CNT=41 /TID=Mm.25427.1 /TIER=Stack /STK=30 /UG=Mm.25427 /UG_TITLE=ESTs	0.61989	0.49175	0.87044	1.0786	1.0985	-0.19528	0.011057	-0.27349	0.77986	0.45308	0.16604
1455160_at	4	2610203C20Rik	RIKEN cDNA 2610203C20 gene	---	---	---	---	gb:BM220421 /DB_XREF=gi:17780488 /DB_XREF=C0940E03-3 /CLONE=C0940E03 /FEA=EST /CNT=39 /TID=Mm.38166.1 /TIER=Stack /STK=22 /UG=Mm.38166 /LL=99733 /UG_GENE=AI848448 /UG_TITLE=expressed sequence AI848448	0.50959	0.61224	0.44056	1.0798	0.76993	0.20773	0.073699	-0.013689	0.64305	0.4406	0.55661
1456787_at	4	---	---	---	---	---	---	gb:BM220188 /DB_XREF=gi:17780210 /DB_XREF=C0936F08-3 /CLONE=C0936F08 /FEA=EST /CNT=9 /TID=Mm.169436.1 /TIER=ConsEnd /STK=7 /UG=Mm.169436 /UG_TITLE=ESTs	0.80204	0.44226	0.44608	1.2082	0.85098	-0.029016	-0.10229	0.052755	0.64611	0.49158	0.4842
1456789_at	4	Zfp462	zinc finger protein 462	0043392 // negative regulation of DNA binding // inferred from direct assay /// 0045944 // positive regulation of transcription from RNA polymerase II promoter // inferred from direct assay	0005622 // intracellular // inferred from electronic annotation /// 0005634 // nucleus // inferred from direct assay	0008270 // zinc ion binding // inferred from electronic annotation	---	gb:AW491540 /DB_XREF=gi:7061821 /DB_XREF=UI-M-BH3-atp-e-01-0-UI.s1 /CLONE=UI-M-BH3-atp-e-01-0-UI /FEA=EST /CNT=15 /TID=Mm.101959.1 /TIER=ConsEnd /STK=7 /UG=Mm.101959 /UG_TITLE=ESTs	0.51133	0.27073	0.65063	0.95254	0.9838	-0.13252	-0.16916	-0.2115	0.59299	0.66809	0.52985
1417023_a_at	5	Fabp4	fatty acid binding protein 4, adipocyte	0001816 // cytokine production // inferred from mutant phenotype /// 0006469 // negative regulation of protein kinase activity // inferred from mutant phenotype /// 0006631 // fatty acid metabolic process // inferred from electronic annotation /// 0006810 // transport // inferred from electronic annotation /// 0008284 // positive regulation of cell proliferation // inferred from electronic annota…	0005634 // nucleus // inferred from electronic annotation /// 0005737 // cytoplasm // inferred from electronic annotation /// 0005829 // cytosol // inferred from electronic annotation	0005215 // transporter activity // inferred from electronic annotation /// 0005488 // binding // inferred from electronic annotation /// 0005515 // protein binding // inferred from electronic annotation /// 0008289 // lipid binding // inferred from electronic annotation /// 0016564 // transcription repressor activity // inferred from mutant phenotype	---	gb:NM_024406.1 /DB_XREF=gi:14149634 /GEN=Fabp4 /FEA=FLmRNA /CNT=222 /TID=Mm.582.1 /TIER=FL+Stack /STK=59 /UG=Mm.582 /LL=11770 /DEF=Mus musculus fatty acid binding protein 4, adipocyte (Fabp4), mRNA. /PROD=fatty acid binding protein 4, adipocyte /FL=gb:K02109.1 gb:NM_024406.1	-0.45235	-0.51969	-0.60966	-0.93989	-0.70107	-0.26871	-0.2915	-0.29168	-0.25723	-0.17969	0.32142
1418595_at	5	Plin4	perilipin 4	---	0005737 // cytoplasm // inferred from electronic annotation /// 0005811 // lipid particle // inferred from electronic annotation /// 0005886 // plasma membrane // inferred from direct assay /// 0005886 // plasma membrane // inferred from electronic annotation /// 0012511 // monolayer-surrounded lipid storage body // inferred from electronic annotation /// 0016020 // membrane // inferred from elec…	---	---	gb:NM_020568.1 /DB_XREF=gi:10181203 /GEN=S3-12-pending /FEA=FLmRNA /CNT=45 /TID=Mm.12966.1 /TIER=FL+Stack /STK=21 /UG=Mm.12966 /LL=57435 /DEF=Mus musculus plasma membrane associated protein, S3-12 (S3-12-pending), mRNA. /PROD=plasma membrane associated protein, S3-12 /FL=gb:AF064748.1 gb:NM_020568.1	-0.45305	-0.57426	-0.54238	-0.84437	-0.91162	-0.33093	-0.24212	-0.33703	-0.18354	-0.11897	0.089211
1420399_at	5	Gfi1b	growth factor independent 1B	0006350 // transcription // inferred from electronic annotation /// 0007275 // multicellular organismal development // inferred from electronic annotation /// 0045449 // regulation of transcription // inferred from electronic annotation	0005622 // intracellular // inferred from electronic annotation /// 0005634 // nucleus // inferred from electronic annotation	0003676 // nucleic acid binding // inferred from electronic annotation /// 0003677 // DNA binding // inferred from electronic annotation /// 0005515 // protein binding // inferred from electronic annotation /// 0008270 // zinc ion binding // inferred from electronic annotation /// 0046872 // metal ion binding // inferred from electronic annotation	---	gb:NM_008114.1 /DB_XREF=gi:6679990 /GEN=Gfi1b /FEA=FLmRNA /CNT=19 /TID=Mm.10804.1 /TIER=FL /STK=5 /UG=Mm.10804 /LL=14582 /DEF=Mus musculus growth factor independent 1B (Gfi1b), mRNA. /PROD=growth factor independent 1B /FL=gb:NM_008114.1 gb:AF017275.1	-0.40059	-0.54431	-0.30865	-0.81209	-0.53728	0.5889	0.47547	0.015597	-0.26359	-0.01283	0.21426
1422905_s_at	5	Fmo2	flavin containing monooxygenase 2	0006800 // oxygen and reactive oxygen species metabolic process // inferred from direct assay /// 0055114 // oxidation reduction // inferred from electronic annotation	0005783 // endoplasmic reticulum // inferred from electronic annotation /// 0005789 // endoplasmic reticulum membrane // inferred from electronic annotation /// 0005792 // microsome // inferred from electronic annotation /// 0016020 // membrane // inferred from electronic annotation /// 0016021 // integral to membrane // inferred from electronic annotation /// 0031227 // intrinsic to endoplasmic …	0000287 // magnesium ion binding // inferred from electronic annotation /// 0004497 // monooxygenase activity // inferred from direct assay /// 0004497 // monooxygenase activity // inferred from electronic annotation /// 0004499 // flavin-containing monooxygenase activity // inferred from electronic annotation /// 0016491 // oxidoreductase activity // inferred from electronic annotation /// 00506…	---	gb:NM_018881.1 /DB_XREF=gi:9256538 /GEN=Fmo2 /FEA=FLmRNA /CNT=43 /TID=Mm.10929.1 /TIER=FL+Stack /STK=8 /UG=Mm.10929 /LL=55990 /DEF=Mus musculus flavin containing monooxygenase 2 (Fmo2), mRNA. /PROD=flavin-containing monooxygenase 2 /FL=gb:NM_018881.1 gb:AF184981.1	-0.21751	-0.32691	-0.55163	-0.56483	-0.55164	-0.054608	0.49353	-0.049494	0.13513	-0.284	-0.12896
1422973_a_at	5	Thrsp	thyroid hormone responsive SPOT14 homolog (Rattus)	---	0005634 // nucleus // inferred from electronic annotation	0005515 // protein binding // inferred from electronic annotation	---	gb:NM_009381.1 /DB_XREF=gi:6678344 /GEN=Thrsp /FEA=FLmRNA /CNT=16 /TID=Mm.28585.1 /TIER=FL /STK=0 /UG=Mm.28585 /LL=21835 /DEF=Mus musculus thyroid hormone responsive SPOT14 homolog (Rattus) (Thrsp), mRNA. /PROD=thyroid hormone responsive SPOT14 homolog(Rattus) /FL=gb:NM_009381.1	-0.82329	-0.73103	-0.59932	-0.88959	-0.83385	-0.51975	-0.41366	-0.54647	-0.5417	-0.14517	-0.007489
1424155_at	5	Fabp4	fatty acid binding protein 4, adipocyte	0001816 // cytokine production // inferred from mutant phenotype /// 0006469 // negative regulation of protein kinase activity // inferred from mutant phenotype /// 0006631 // fatty acid metabolic process // inferred from electronic annotation /// 0006810 // transport // inferred from electronic annotation /// 0008284 // positive regulation of cell proliferation // inferred from electronic annota…	0005634 // nucleus // inferred from electronic annotation /// 0005737 // cytoplasm // inferred from electronic annotation /// 0005829 // cytosol // inferred from electronic annotation	0005215 // transporter activity // inferred from electronic annotation /// 0005488 // binding // inferred from electronic annotation /// 0005515 // protein binding // inferred from electronic annotation /// 0008289 // lipid binding // inferred from electronic annotation /// 0016564 // transcription repressor activity // inferred from mutant phenotype	---	gb:BC002148.1 /DB_XREF=gi:12805356 /FEA=FLmRNA /CNT=59 /TID=Mm.582.2 /TIER=FL+Stack /STK=49 /UG=Mm.582 /LL=11770 /UG_GENE=Fabp4 /DEF=Mus musculus, clone MGC:7265 IMAGE:3484864, mRNA, complete cds. /PROD=Unknown (protein for MGC:7265) /FL=gb:BC002148.1	-0.34081	-0.62668	-0.58836	-0.89968	-0.49602	-0.41284	-0.49846	-0.25986	-0.33439	0.018875	0.11184
1424393_s_at	5	Adhfe1	alcohol dehydrogenase, iron containing, 1	0015993 // molecular hydrogen transport // inferred from electronic annotation /// 0015993 // molecular hydrogen transport // inferred from sequence or structural similarity /// 0055114 // oxidation reduction // inferred from electronic annotation	0005739 // mitochondrion // inferred from direct assay /// 0005739 // mitochondrion // inferred from electronic annotation	0016491 // oxidoreductase activity // inferred from electronic annotation /// 0046872 // metal ion binding // inferred from electronic annotation /// 0047988 // hydroxyacid-oxoacid transhydrogenase activity // inferred from electronic annotation /// 0047988 // hydroxyacid-oxoacid transhydrogenase activity // inferred from sequence or structural similarity	---	gb:BC026584.1 /DB_XREF=gi:20072015 /FEA=FLmRNA /CNT=93 /TID=Mm.28514.1 /TIER=FL+Stack /STK=34 /UG=Mm.28514 /LL=76187 /UG_GENE=6330565B14Rik /DEF=Mus musculus, clone MGC:37234 IMAGE:4972323, mRNA, complete cds. /PROD=Unknown (protein for MGC:37234) /FL=gb:BC026584.1	-0.51467	-0.51961	-0.40527	-0.42651	-0.59878	-0.53176	-0.47651	-0.26637	-0.052364	-0.01716	-0.053719
1425809_at	5	Fabp4	fatty acid binding protein 4, adipocyte	0001816 // cytokine production // inferred from mutant phenotype /// 0006469 // negative regulation of protein kinase activity // inferred from mutant phenotype /// 0006631 // fatty acid metabolic process // inferred from electronic annotation /// 0006810 // transport // inferred from electronic annotation /// 0008284 // positive regulation of cell proliferation // inferred from electronic annota…	0005634 // nucleus // inferred from electronic annotation /// 0005737 // cytoplasm // inferred from electronic annotation /// 0005829 // cytosol // inferred from electronic annotation	0005215 // transporter activity // inferred from electronic annotation /// 0005488 // binding // inferred from electronic annotation /// 0005515 // protein binding // inferred from electronic annotation /// 0008289 // lipid binding // inferred from electronic annotation /// 0016564 // transcription repressor activity // inferred from mutant phenotype	---	gb:BC018558.1 /DB_XREF=gi:17391328 /FEA=FLmRNA /CNT=6 /TID=Mm.214644.1 /TIER=FL /STK=1 /UG=Mm.214644 /DEF=Mus musculus, Similar to fatty acid binding protein 4, adipocyte, clone MGC:18548 IMAGE:3670866, mRNA, complete cds. /PROD=Similar to fatty acid binding protein 4,adipocyte /FL=gb:BC018558.1	-0.35684	-0.66999	-0.53966	-0.79053	-0.4696	-0.69225	-0.57795	-0.37676	-0.26842	0.030377	0.051974
1428021_at	5	Mccc2	methylcrotonoyl-Coenzyme A carboxylase 2 (beta)	---	0005739 // mitochondrion // inferred from direct assay /// 0005739 // mitochondrion // inferred from electronic annotation /// 0005759 // mitochondrial matrix // inferred from electronic annotation	0000166 // nucleotide binding // inferred from electronic annotation /// 0004485 // methylcrotonoyl-CoA carboxylase activity // inferred from electronic annotation /// 0005524 // ATP binding // inferred from electronic annotation /// 0016874 // ligase activity // inferred from electronic annotation	---	gb:BI155184 /DB_XREF=gi:14615185 /DB_XREF=602903163F1 /CLONE=IMAGE:5032911 /FEA=mRNA /CNT=5 /TID=Mm.221067.1 /TIER=ConsEnd /STK=0 /UG=Mm.221067 /UG_TITLE=Mus musculus, Similar to methylcrotonoyl-Coenzyme A carboxylase 2 (beta), clone MGC:41339 IMAGE:1244820, mRNA, complete cds	-0.35102	-0.16403	-0.71922	-0.90279	-0.74517	-0.12227	-0.11465	-0.29768	0.24849	0.12244	0.57477
1430584_s_at	5	Car3	carbonic anhydrase 3	0006730 // one-carbon metabolic process // inferred from electronic annotation /// 0006979 // response to oxidative stress // inferred from electronic annotation	0005737 // cytoplasm // inferred from electronic annotation	0004089 // carbonate dehydratase activity // inferred from electronic annotation /// 0008270 // zinc ion binding // inferred from electronic annotation /// 0016151 // nickel ion binding // inferred from direct assay /// 0016829 // lyase activity // inferred from electronic annotation /// 0046872 // metal ion binding // inferred from electronic annotation	---	gb:BB213876 /DB_XREF=gi:16352913 /DB_XREF=BB213876 /CLONE=A530014M23 /FEA=mRNA /CNT=13 /TID=Mm.160284.1 /TIER=ConsEnd /STK=1 /UG=Mm.160284 /UG_TITLE=Mus musculus adult male xiphoid cartilage cDNA, RIKEN full-length enriched library, clone:5230400J22:carbonic anhydrase 3, full insert sequence	-0.5008	-1.3662	-0.67217	-0.67471	-0.47638	-0.81979	-1.0304	-0.72475	-0.16948	-0.062916	0.13461
1432050_at	5	4930571B16Rik	RIKEN cDNA 4930571B16 gene	---	---	---	---	gb:AK016268.1 /DB_XREF=gi:12854931 /GEN=Samsn1 /FEA=mRNA /CNT=1 /TID=Mm.131406.5 /TIER=ConsEnd /STK=0 /UG=Mm.131406 /LL=67742 /UG_TITLE=SAM domain, SH3 domain and nuclear localisation signals, 1 /DEF=Mus musculus adult male testis cDNA, RIKEN full-length enriched library, clone:4930571B16:SAM domain, SH3 domain and nuclear localisation signals, 1, full insert sequence.	-0.25418	-0.23922	-0.87287	-0.98974	-1.0188	0.016153	-0.16742	-0.32489	0.18501	-0.14463	0.4881
1434280_at	5	---	---	---	---	---	---	gb:BG976607 /DB_XREF=gi:14364244 /DB_XREF=602846904F1 /CLONE=IMAGE:4977457 /FEA=EST /CNT=386 /TID=Mm.30502.2 /TIER=Stack /STK=39 /UG=Mm.30502 /LL=13803 /UG_GENE=Enc1 /UG_TITLE=ectodermal-neural cortex 1	-0.44556	-0.37518	-0.66464	-1.0376	-0.7315	0.017025	-0.067863	-0.082512	-0.2403	-0.067437	0.31755
1438091_a_at	5	Gm6722 /// H2afz	predicted gene 6722 /// H2A histone family, member Z	0006334 // nucleosome assembly // inferred from electronic annotation /// 0007275 // multicellular organismal development // inferred from electronic annotation	0000786 // nucleosome // inferred from electronic annotation /// 0001740 // Barr body // not recorded /// 0005634 // nucleus // inferred from direct assay /// 0005634 // nucleus // not recorded /// 0005634 // nucleus // inferred from electronic annotation /// 0005694 // chromosome // inferred from electronic annotation	0003677 // DNA binding // inferred from electronic annotation	---	gb:AV003424 /DB_XREF=gi:4780274 /DB_XREF=AV003424 /CLONE=0610027M19 /FEA=EST /CNT=14 /TID=Mm.916.5 /TIER=Stack /STK=12 /UG=Mm.916 /LL=51788 /UG_GENE=H2afz /UG_TITLE=H2A histone family, member Z	-0.20219	-0.30194	-0.51261	-0.59022	-0.76746	0.014856	-0.24924	-0.21443	0.0065373	-0.16925	0.097501
1440807_at	5	---	---	---	---	---	---	gb:BB337886 /DB_XREF=gi:9046649 /DB_XREF=BB337886 /CLONE=B930010F20 /FEA=EST /CNT=5 /TID=Mm.132480.1 /TIER=ConsEnd /STK=5 /UG=Mm.132480 /UG_TITLE=ESTs	-0.4022	-0.32826	-0.79544	-0.40197	-0.26428	-0.082346	-0.10516	-0.59864	0.53171	0.50161	0.72558
1442120_at	5	G730007D18Rik	RIKEN cDNA G730007D18 gene	---	---	---	---	gb:AA153229 /DB_XREF=gi:1724878 /DB_XREF=mr17d02.r1 /CLONE=IMAGE:597699 /FEA=EST /CNT=6 /TID=Mm.20227.1 /TIER=ConsEnd /STK=3 /UG=Mm.20227 /UG_TITLE=ESTs, Weakly similar to open reading frame (M.musculus)	-0.38921	0.012572	-0.73573	-0.67205	-0.71839	-0.014768	-0.14561	0.0054523	-0.2674	-0.19077	0.26506
1444207_at	5	Alms1	Alstrom syndrome 1 homolog (human)	0001678 // cellular glucose homeostasis // not recorded /// 0006629 // lipid metabolic process // inferred from mutant phenotype /// 0006641 // triglyceride metabolic process // inferred from mutant phenotype /// 0006915 // apoptosis // inferred from mutant phenotype /// 0007286 // spermatid development // inferred from mutant phenotype /// 0007605 // sensory perception of sound // inferred from …	0005737 // cytoplasm // inferred from electronic annotation /// 0005813 // centrosome // not recorded /// 0005813 // centrosome // inferred from electronic annotation /// 0005929 // cilium // inferred from electronic annotation /// 0005932 // microtubule basal body // inferred from electronic annotation /// 0042995 // cell projection // inferred from electronic annotation	---	---	gb:BM070003 /DB_XREF=gi:16910555 /DB_XREF=id79f01.x1 /CLONE=IMAGE:5669497 /FEA=EST /CNT=5 /TID=Mm.186929.1 /TIER=ConsEnd /STK=2 /UG=Mm.186929 /UG_TITLE=ESTs	-0.47024	-0.51499	-0.85644	-1.0238	-0.87495	-0.018094	-0.12528	-0.12477	0.14661	-0.19066	0.73387
1444717_at	5	---	---	---	---	---	---	gb:AV356898 /DB_XREF=gi:16397395 /DB_XREF=AV356898 /CLONE=7330443G11 /FEA=EST /CNT=4 /TID=Mm.127888.1 /TIER=ConsEnd /STK=2 /UG=Mm.127888 /UG_TITLE=ESTs	-0.27028	-0.023166	-0.69263	-0.59654	-0.832	0.17142	-0.040102	0.098998	-0.27737	-0.17444	-0.24031
1445193_x_at	5	D8Ertd575e	DNA segment, Chr 8, ERATO Doi 575, expressed	---	---	---	---	gb:BG068436 /DB_XREF=gi:12551005 /DB_XREF=H3065E02-3 /CLONE=H3065E02 /FEA=EST /CNT=3 /TID=Mm.171934.1 /TIER=ConsEnd /STK=2 /UG=Mm.171934 /LL=52367 /UG_GENE=D8Ertd575e /UG_TITLE=DNA segment, Chr 8, ERATO Doi 575, expressed	-0.69823	-0.44197	-0.5757	-0.69298	-0.86944	-0.074172	-0.072849	-0.46868	0.2988	0.29439	0.53305
1445321_at	5	---	---	---	---	---	---	gb:BG063377 /DB_XREF=gi:12545940 /DB_XREF=H3006E10-3 /CLONE=H3006E10 /FEA=EST /CNT=3 /TID=Mm.218665.1 /TIER=ConsEnd /STK=2 /UG=Mm.218665 /UG_TITLE=ESTs, Weakly similar to T14155 zinc finger protein Peg3 - mouse (M.musculus)	-0.75012	-0.26783	-0.56706	-0.47919	-0.57472	0.046401	0.17448	-0.37406	0.12075	0.22923	0.50584
1446447_at	5	---	---	---	---	---	---	gb:BB081671 /DB_XREF=gi:16260664 /DB_XREF=BB081671 /CLONE=9330170H13 /FEA=EST /CNT=2 /TID=Mm.118938.1 /TIER=ConsEnd /STK=2 /UG=Mm.118938 /UG_TITLE=ESTs	-0.04809	-0.19588	-0.60445	-0.61173	-0.57773	0.003649	0.055103	0.1115	0.30441	0.026759	0.031223
1446530_at	5	---	---	---	---	---	---	gb:BG069648 /DB_XREF=gi:12552217 /DB_XREF=H3078F03-3 /CLONE=H3078F03 /FEA=EST /CNT=2 /TID=Mm.172165.1 /TIER=ConsEnd /STK=2 /UG=Mm.172165 /UG_TITLE=ESTs	-0.052284	0.033653	-0.61061	-0.62186	-0.43109	-0.48289	-0.11632	-0.24995	0.12051	0.055747	0.56817
1447749_at	5	Smyd5	SET and MYND domain containing 5	---	---	0008270 // zinc ion binding // inferred from electronic annotation /// 0046872 // metal ion binding // inferred from electronic annotation	---	gb:BB419334 /DB_XREF=gi:9240689 /DB_XREF=BB419334 /CLONE=C530015L21 /FEA=EST /CNT=2 /TID=Mm.170170.1 /TIER=ConsEnd /STK=2 /UG=Mm.170170 /UG_TITLE=ESTs, Weakly similar to G02453 NN8-4AG (H.sapiens)	-0.17326	0.033317	-0.514	-0.5686	-0.58852	-0.1741	-0.35658	-0.20272	-0.054356	-0.2094	0.31284
1448010_at	5	A430104N18Rik	RIKEN cDNA A430104N18 gene	---	---	---	---	gb:AA254104 /DB_XREF=gi:1888688 /DB_XREF=va08f05.r1 /CLONE=IMAGE:722337 /FEA=EST /CNT=15 /TID=Mm.1891.1 /TIER=ConsEnd /STK=0 /UG=Mm.1891 /LL=104686 /UG_GENE=AW909330 /UG_TITLE=expressed sequence AW909330	-0.4015	-0.18668	-0.63271	-0.64815	-0.55938	-0.046152	-0.09237	-0.041481	-0.059128	-0.1092	0.30406
1449434_at	5	Car3	carbonic anhydrase 3	0006730 // one-carbon metabolic process // inferred from electronic annotation /// 0006979 // response to oxidative stress // inferred from electronic annotation	0005737 // cytoplasm // inferred from electronic annotation	0004089 // carbonate dehydratase activity // inferred from electronic annotation /// 0008270 // zinc ion binding // inferred from electronic annotation /// 0016151 // nickel ion binding // inferred from direct assay /// 0016829 // lyase activity // inferred from electronic annotation /// 0046872 // metal ion binding // inferred from electronic annotation	---	gb:AK003671.1 /DB_XREF=gi:12834480 /GEN=Car3 /FEA=FLmRNA /CNT=422 /TID=Mm.300.1 /TIER=Stack /STK=91 /UG=Mm.300 /LL=12350 /UG_TITLE=carbonic anhydrase 3 /DEF=Mus musculus 18 days embryo whole body cDNA, RIKEN full-length enriched library, clone:1110013P06:carbonic anhydrase 3, full insert sequence. /FL=gb:BC011129.1 gb:NM_007606.1 gb:M27796.1	-0.19519	-0.56796	-0.53999	-0.89074	-0.55477	-0.51835	-0.56962	-0.41797	-0.40373	0.065221	0.29453
1451263_a_at	5	Fabp4	fatty acid binding protein 4, adipocyte	0001816 // cytokine production // inferred from mutant phenotype /// 0006469 // negative regulation of protein kinase activity // inferred from mutant phenotype /// 0006631 // fatty acid metabolic process // inferred from electronic annotation /// 0006810 // transport // inferred from electronic annotation /// 0008284 // positive regulation of cell proliferation // inferred from electronic annota…	0005634 // nucleus // inferred from electronic annotation /// 0005737 // cytoplasm // inferred from electronic annotation /// 0005829 // cytosol // inferred from electronic annotation	0005215 // transporter activity // inferred from electronic annotation /// 0005488 // binding // inferred from electronic annotation /// 0005515 // protein binding // inferred from electronic annotation /// 0008289 // lipid binding // inferred from electronic annotation /// 0016564 // transcription repressor activity // inferred from mutant phenotype	---	gb:BC002148.1 /DB_XREF=gi:12805356 /FEA=FLmRNA /CNT=59 /TID=Mm.582.2 /TIER=FL+Stack /STK=49 /UG=Mm.582 /LL=11770 /UG_GENE=Fabp4 /DEF=Mus musculus, clone MGC:7265 IMAGE:3484864, mRNA, complete cds. /PROD=Unknown (protein for MGC:7265) /FL=gb:BC002148.1	-0.28568	-0.46578	-0.59067	-0.96526	-0.62119	-0.31706	-0.27596	-0.36762	-0.30187	-0.15472	0.25354
1452433_at	5	---	---	---	---	---	---	gb:BB662083 /DB_XREF=gi:16495838 /DB_XREF=BB662083 /CLONE=D830021I19 /FEA=mRNA /CNT=22 /TID=Mm.218310.1 /TIER=ConsEnd /STK=0 /UG=Mm.218310 /UG_TITLE=Murine (DBA2) mRNA fragment for gag related peptide	-0.2597	-0.16995	-0.77381	-0.79366	-0.78828	-0.17816	0.039678	-0.10123	-0.40224	-0.25218	0.29605
1453588_at	5	Car3	carbonic anhydrase 3	0006730 // one-carbon metabolic process // inferred from electronic annotation /// 0006979 // response to oxidative stress // inferred from electronic annotation	0005737 // cytoplasm // inferred from electronic annotation	0004089 // carbonate dehydratase activity // inferred from electronic annotation /// 0008270 // zinc ion binding // inferred from electronic annotation /// 0016151 // nickel ion binding // inferred from direct assay /// 0016829 // lyase activity // inferred from electronic annotation /// 0046872 // metal ion binding // inferred from electronic annotation	---	gb:BB213876 /DB_XREF=gi:16352913 /DB_XREF=BB213876 /CLONE=A530014M23 /FEA=mRNA /CNT=13 /TID=Mm.160284.1 /TIER=ConsEnd /STK=1 /UG=Mm.160284 /UG_TITLE=Mus musculus adult male xiphoid cartilage cDNA, RIKEN full-length enriched library, clone:5230400J22:carbonic anhydrase 3, full insert sequence	-0.57562	-1.3323	-0.82222	-0.47915	-0.51872	-0.88389	-1.1555	-1.0079	0.028084	0.0076957	0.35328
1453985_at	5	0610007P08Rik	RIKEN cDNA 0610007P08 gene	0006281 // DNA repair // inferred from electronic annotation /// 0006974 // response to DNA damage stimulus // inferred from electronic annotation	0005634 // nucleus // inferred from electronic annotation	0000166 // nucleotide binding // inferred from electronic annotation /// 0003676 // nucleic acid binding // inferred from electronic annotation /// 0003677 // DNA binding // inferred from electronic annotation /// 0004386 // helicase activity // inferred from electronic annotation /// 0005524 // ATP binding // inferred from electronic annotation /// 0008026 // ATP-dependent helicase activity // i…	---	gb:AK002307.1 /DB_XREF=gi:12832192 /FEA=mRNA /CNT=2 /TID=Mm.101095.2 /TIER=ConsEnd /STK=0 /UG=Mm.101095 /LL=76251 /UG_GENE=0610007P08Rik /UG_TITLE=RIKEN cDNA 0610007P08 gene /DEF=Mus musculus adult male kidney cDNA, RIKEN full-length enriched library, clone:0610007P08:similar to PUTATIVE REPAIR AND RECOMBINATION HELICASE RAD26L (FRAGMENT), full insert sequence.	-0.097668	0.0085699	-0.64884	-0.73401	-0.65827	-0.2674	-0.30175	-0.37075	-0.034795	-0.035851	0.38049
1454781_x_at	5	Commd9	COMM domain containing 9	---	---	---	---	gb:BB506415 /DB_XREF=gi:9515377 /DB_XREF=BB506415 /CLONE=D730008A18 /FEA=EST /CNT=53 /TID=Mm.22353.2 /TIER=Stack /STK=50 /UG=Mm.22353 /LL=76501 /UG_GENE=1810029F08Rik /UG_TITLE=RIKEN cDNA 1810029F08 gene	-0.58746	-0.20729	-0.63986	-0.61131	-0.66631	0.16994	0.10869	-0.22285	0.026544	0.034742	0.29063
1456793_at	5	Cytl1	cytokine-like 1	0002062 // chondrocyte differentiation // inferred from direct assay /// 0045944 // positive regulation of transcription from RNA polymerase II promoter // inferred from direct assay /// 0050650 // chondroitin sulfate proteoglycan biosynthetic process // inferred from direct assay /// 0051091 // positive regulation of transcription factor activity // inferred from direct assay	---	0016563 // transcription activator activity // inferred from direct assay	---	gb:AV264055 /DB_XREF=gi:16389173 /DB_XREF=AV264055 /CLONE=4930443F05 /FEA=EST /CNT=11 /TID=Mm.76407.1 /TIER=ConsEnd /STK=7 /UG=Mm.76407 /UG_TITLE=ESTs	-1.1571	-1.083	-1.03	-1.2314	-1.3522	-0.2067	-0.30586	-0.6944	-0.66132	-0.44959	-0.3546
1457129_at	5	Zfp458	Zinc finger protein 458	0006350 // transcription // inferred from electronic annotation /// 0006355 // regulation of transcription, DNA-dependent // inferred from electronic annotation	0005622 // intracellular // inferred from electronic annotation /// 0005634 // nucleus // inferred from electronic annotation	0003676 // nucleic acid binding // inferred from electronic annotation /// 0008270 // zinc ion binding // inferred from electronic annotation /// 0046872 // metal ion binding // inferred from electronic annotation	---	gb:BI076816 /DB_XREF=gi:14515473 /DB_XREF=L0274H09-3 /CLONE=L0274H09 /FEA=EST /CNT=6 /TID=Mm.134621.1 /TIER=ConsEnd /STK=5 /UG=Mm.134621 /UG_TITLE=ESTs, Weakly similar to GNMSLL retrovirus-related reverse transcriptase homolog - mouse retrotransposon (M.musculus)	-0.48915	-0.14735	-0.8056	-0.89516	-0.74727	-0.65793	-0.54132	-0.16151	-0.0029546	-0.50847	0.30387
1457841_at	5	---	---	---	---	---	---	gb:BG067993 /DB_XREF=gi:12550562 /DB_XREF=H3060E10-3 /CLONE=H3060E10 /FEA=EST /CNT=5 /TID=Mm.148701.1 /TIER=ConsEnd /STK=3 /UG=Mm.148701 /UG_TITLE=ESTs, Weakly similar to env polyprotein, retrovirus-related (M.musculus)	-0.11687	-0.21117	-0.89965	-0.76678	-0.88502	-0.021867	-0.32915	-0.12834	0.17623	-0.21774	0.7539
1416289_at	6	Plod1	procollagen-lysine, 2-oxoglutarate 5-dioxygenase 1	0055114 // oxidation reduction // inferred from electronic annotation	0005783 // endoplasmic reticulum // inferred from electronic annotation /// 0016020 // membrane // inferred from electronic annotation	0005506 // iron ion binding // inferred from electronic annotation /// 0008475 // procollagen-lysine 5-dioxygenase activity // inferred from electronic annotation /// 0016491 // oxidoreductase activity // inferred from electronic annotation /// 0016702 // oxidoreductase activity, acting on single donors with incorporation of molecular oxygen, incorporation of two atoms of oxygen // inferred from …	---	gb:NM_011122.1 /DB_XREF=gi:6755105 /GEN=Plod1 /FEA=FLmRNA /CNT=198 /TID=Mm.37371.1 /TIER=FL+Stack /STK=101 /UG=Mm.37371 /LL=18822 /DEF=Mus musculus procollagen-lysine, 2-oxoglutarate 5-dioxygenase 1 (Plod1), mRNA. /PROD=procollagen-lysine, 2-oxoglutarate 5-dioxygenase1 /FL=gb:BC010268.1 gb:BC006599.1 gb:AF046782.1 gb:NM_011122.1	0.47249	0.69319	0.6024	0.81403	0.85312	0.084114	0.29454	0.078567	0.47435	0.26293	0.35414
1416590_a_at	6	Rab34	RAB34, member of RAS oncogene family	0006810 // transport // inferred from electronic annotation /// 0006897 // endocytosis // inferred from direct assay /// 0007264 // small GTPase mediated signal transduction // inferred from electronic annotation /// 0015031 // protein transport // inferred from electronic annotation	0001726 // ruffle // inferred from direct assay /// 0005737 // cytoplasm // inferred from electronic annotation /// 0005769 // early endosome // inferred from direct assay /// 0005794 // Golgi apparatus // inferred from electronic annotation	0000166 // nucleotide binding // inferred from electronic annotation /// 0003924 // GTPase activity // inferred from direct assay /// 0005525 // GTP binding // inferred from electronic annotation /// 0019001 // guanyl nucleotide binding // inferred from direct assay	---	gb:AF327929.1 /DB_XREF=gi:12963386 /FEA=FLmRNA /CNT=193 /TID=Mm.28941.1 /TIER=FL+Stack /STK=79 /UG=Mm.28941 /LL=19376 /UG_GENE=Rab34 /DEF=Mus musculus small GTPase Rah mRNA, complete cds. /PROD=small GTPase Rah /FL=gb:AF322068.1 gb:NM_033475.1 gb:AF327929.1	0.56145	0.51537	0.53664	0.78412	0.66621	0.30517	0.30861	0.09916	0.60838	0.32819	0.41211
1416591_at	6	Rab34	RAB34, member of RAS oncogene family	0006810 // transport // inferred from electronic annotation /// 0006897 // endocytosis // inferred from direct assay /// 0007264 // small GTPase mediated signal transduction // inferred from electronic annotation /// 0015031 // protein transport // inferred from electronic annotation	0001726 // ruffle // inferred from direct assay /// 0005737 // cytoplasm // inferred from electronic annotation /// 0005769 // early endosome // inferred from direct assay /// 0005794 // Golgi apparatus // inferred from electronic annotation	0000166 // nucleotide binding // inferred from electronic annotation /// 0003924 // GTPase activity // inferred from direct assay /// 0005525 // GTP binding // inferred from electronic annotation /// 0019001 // guanyl nucleotide binding // inferred from direct assay	---	gb:AF327929.1 /DB_XREF=gi:12963386 /FEA=FLmRNA /CNT=193 /TID=Mm.28941.1 /TIER=FL+Stack /STK=79 /UG=Mm.28941 /LL=19376 /UG_GENE=Rab34 /DEF=Mus musculus small GTPase Rah mRNA, complete cds. /PROD=small GTPase Rah /FL=gb:AF322068.1 gb:NM_033475.1 gb:AF327929.1	0.4614	0.59705	0.57877	0.89205	0.71768	0.20192	0.18929	0.025559	0.61805	0.36564	0.45369
1416600_a_at	6	Rcan1	regulator of calcineurin 1	0019722 // calcium-mediated signaling // inferred from electronic annotation /// 0043666 // regulation of phosphoprotein phosphatase activity // inferred from direct assay /// 0048741 // skeletal muscle fiber development // inferred from direct assay	0005634 // nucleus // inferred from direct assay /// 0005737 // cytoplasm // inferred from direct assay	0005515 // protein binding // inferred from electronic annotation	---	gb:AF260717.1 /DB_XREF=gi:7839596 /GEN=Dscr1 /FEA=FLmRNA /CNT=119 /TID=Mm.56.1 /TIER=FL+Stack /STK=79 /UG=Mm.56 /LL=54720 /DEF=Mus musculus Down syndrome candiate region 1 (Dscr1) mRNA, complete cds. /PROD=Down syndrome candiate region 1 /FL=gb:AF260717.1 gb:AF282255.1 gb:AF237789.1 gb:NM_019466.1	0.31008	0.58484	0.57498	1.2222	0.9703	0.071595	0.29802	0.1373	0.46395	0.23282	0.26606
1417455_at	6	Tgfb3	transforming growth factor, beta 3	0000187 // activation of MAPK activity // inferred from electronic annotation /// 0001666 // response to hypoxia // inferred from electronic annotation /// 0001701 // in utero embryonic development // inferred from mutant phenotype /// 0006917 // induction of apoptosis // inferred from mutant phenotype /// 0007184 // SMAD protein nuclear translocation // inferred from electronic annotation /// 00…	0005576 // extracellular region // inferred from electronic annotation /// 0005615 // extracellular space // inferred from electronic annotation /// 0005634 // nucleus // inferred from electronic annotation /// 0005737 // cytoplasm // inferred from electronic annotation /// 0009986 // cell surface // inferred from electronic annotation /// 0030141 // secretory granule // inferred from electronic …	0005114 // type II transforming growth factor beta receptor binding // inferred from electronic annotation /// 0005160 // transforming growth factor beta receptor binding // inferred from electronic annotation /// 0008083 // growth factor activity // inferred from electronic annotation /// 0034713 // type I transforming growth factor beta receptor binding // inferred from electronic annotation //…	---	gb:BC014690.1 /DB_XREF=gi:15928416 /FEA=FLmRNA /CNT=145 /TID=Mm.1291.1 /TIER=FL+Stack /STK=44 /UG=Mm.1291 /LL=21809 /UG_GENE=Tgfb3 /DEF=Mus musculus, Transforming growth factor, beta 3, clone MGC:18512 IMAGE:3663150, mRNA, complete cds. /PROD=Transforming growth factor, beta 3 /FL=gb:NM_009368.1 gb:M32745.1 gb:BC014690.1	0.2782	0.61628	0.72591	0.8301	1.0608	-0.018275	0.16613	0.15049	0.5676	0.36901	0.41791
1417644_at	6	Sspn	sarcospan	---	0005886 // plasma membrane // inferred from electronic annotation /// 0016020 // membrane // inferred from electronic annotation /// 0016021 // integral to membrane // inferred from electronic annotation /// 0030054 // cell junction // inferred from electronic annotation /// 0030133 // transport vesicle // inferred from electronic annotation /// 0042383 // sarcolemma // inferred from direct assay…	---	---	gb:NM_010656.1 /DB_XREF=gi:6754475 /GEN=Sspn /FEA=FLmRNA /CNT=118 /TID=Mm.1209.1 /TIER=FL+Stack /STK=40 /UG=Mm.1209 /LL=16651 /DEF=Mus musculus sarcospan (Sspn), mRNA. /PROD=sarcospan /FL=gb:NM_010656.1 gb:BC021484.1 gb:U02487.1	0.44093	0.46718	0.5798	0.69832	0.74534	0.21767	0.39857	-0.059613	0.83736	0.46565	0.51139
1418796_at	6	Clec11a	C-type lectin domain family 11, member a	0008284 // positive regulation of cell proliferation // inferred from electronic annotation /// 0008284 // positive regulation of cell proliferation // inferred from sequence or structural similarity	0005576 // extracellular region // inferred from electronic annotation /// 0005576 // extracellular region // inferred from sequence or structural similarity /// 0005737 // cytoplasm // inferred from electronic annotation	0005488 // binding // inferred from electronic annotation /// 0005529 // sugar binding // non-traceable author statement /// 0005529 // sugar binding // inferred from electronic annotation /// 0008083 // growth factor activity // inferred from electronic annotation /// 0008083 // growth factor activity // inferred from sequence or structural similarity	---	gb:NM_009131.1 /DB_XREF=gi:6677868 /GEN=Scgf /FEA=FLmRNA /CNT=39 /TID=Mm.20428.1 /TIER=FL+Stack /STK=18 /UG=Mm.20428 /LL=20256 /DEF=Mus musculus stem cell growth factor (Scgf), mRNA. /PROD=stem cell growth factor /FL=gb:NM_009131.1 gb:BC002001.1 gb:AB009245.1	0.59914	0.74025	0.51407	0.81832	0.95631	0.054832	0.13618	0.11403	0.57149	0.42635	0.49049
1418942_at	6	Ift74	intraflagellar transport 74 homolog (Chlamydomonas)	---	0016023 // cytoplasmic membrane-bounded vesicle // inferred from electronic annotation /// 0019861 // flagellum // inferred from electronic annotation /// 0031410 // cytoplasmic vesicle // inferred from electronic annotation	---	---	gb:NM_026319.1 /DB_XREF=gi:13385815 /GEN=1700029H06Rik /FEA=FLmRNA /CNT=41 /TID=Mm.24494.1 /TIER=FL+Stack /STK=16 /UG=Mm.24494 /LL=67694 /DEF=Mus musculus RIKEN cDNA 1700029H06 gene (1700029H06Rik), mRNA. /PROD=RIKEN cDNA 1700029H06 /FL=gb:NM_026319.1	0.50287	0.37696	0.36375	0.94168	0.69379	0.028389	0.15083	-0.06589	0.66056	0.31799	0.46254
1420842_at	6	Ptprf	protein tyrosine phosphatase, receptor type, F	0001960 // negative regulation of cytokine-mediated signaling pathway // inferred from electronic annotation /// 0006470 // protein amino acid dephosphorylation // inferred from electronic annotation /// 0007155 // cell adhesion // inferred from electronic annotation /// 0007156 // homophilic cell adhesion // inferred from electronic annotation /// 0007399 // nervous system development // inferre…	0005624 // membrane fraction // inferred from electronic annotation /// 0005768 // endosome // inferred from electronic annotation /// 0005792 // microsome // inferred from electronic annotation /// 0005886 // plasma membrane // inferred from electronic annotation /// 0016020 // membrane // inferred from electronic annotation /// 0016021 // integral to membrane // inferred from electronic annotat…	0004721 // phosphoprotein phosphatase activity // inferred from electronic annotation /// 0004725 // protein tyrosine phosphatase activity // inferred from electronic annotation /// 0004872 // receptor activity // inferred from electronic annotation /// 0005001 // transmembrane receptor protein tyrosine phosphatase activity // inferred from electronic annotation /// 0005158 // insulin receptor bi…	---	gb:BB794653 /DB_XREF=gi:16964272 /DB_XREF=BB794653 /CLONE=G431001E24 /FEA=FLmRNA /CNT=288 /TID=Mm.29855.1 /TIER=Stack /STK=57 /UG=Mm.29855 /LL=19268 /UG_GENE=Ptprf /UG_TITLE=protein tyrosine phosphatase, receptor-type, F /FL=gb:AF300943.1 gb:NM_011213.1	0.36774	0.30539	0.35243	0.75972	0.54136	0.058288	0.16196	0.05984	0.52549	0.29853	0.37591
1423310_at	6	Tpbg	trophoblast glycoprotein	---	0005737 // cytoplasm // inferred from direct assay /// 0005783 // endoplasmic reticulum // inferred from direct assay /// 0016020 // membrane // inferred from electronic annotation /// 0016021 // integral to membrane // inferred from electronic annotation	0005515 // protein binding // inferred from electronic annotation	---	gb:BI685137 /DB_XREF=gi:15647765 /DB_XREF=603310134F1 /CLONE=IMAGE:5345985 /FEA=FLmRNA /CNT=56 /TID=Mm.20864.1 /TIER=Stack /STK=17 /UG=Mm.20864 /LL=21983 /UG_GENE=Tpbg /UG_TITLE=trophoblast glycoprotein /FL=gb:NM_011627.1	0.60799	0.29705	0.33751	0.61551	0.64434	0.078803	0.25378	-0.10876	0.77031	0.56406	0.6292
1423513_at	6	Uhrf1bp1l	UHRF1 (ICBP90) binding protein 1-like	0007155 // cell adhesion // inferred from electronic annotation /// 0007520 // myoblast fusion // inferred from mutant phenotype /// 0045449 // regulation of transcription // inferred from direct assay	0005886 // plasma membrane // inferred from electronic annotation /// 0016020 // membrane // inferred from electronic annotation /// 0016021 // integral to membrane // inferred from electronic annotation	0004872 // receptor activity // inferred from physical interaction /// 0005515 // protein binding // inferred from electronic annotation /// 0005515 // protein binding // inferred from physical interaction /// 0030528 // transcription regulator activity // inferred from direct assay /// 0045296 // cadherin binding // inferred from direct assay	mRNA_processing_binding_Reactome // GenMAPP	gb:BG141609 /DB_XREF=gi:12645004 /DB_XREF=ia91f09.x1 /CLONE=IMAGE:5645728 /FEA=FLmRNA /CNT=54 /TID=Mm.42249.1 /TIER=Stack /STK=14 /UG=Mm.42249 /LL=18007 /UG_GENE=Neo1 /UG_TITLE=neogenin /FL=gb:NM_008684.1	0.38258	0.28866	0.55237	0.6776	0.75227	0.19559	0.25454	0.06075	0.48854	0.18429	0.32612
1423677_at	6	Fkbp9	FK506 binding protein 9	0006457 // protein folding // inferred from direct assay /// 0006457 // protein folding // inferred from electronic annotation	0005783 // endoplasmic reticulum // inferred from direct assay /// 0005783 // endoplasmic reticulum // inferred from electronic annotation /// 0005788 // endoplasmic reticulum lumen // inferred from electronic annotation	0003755 // peptidyl-prolyl cis-trans isomerase activity // inferred from electronic annotation /// 0005509 // calcium ion binding // inferred from direct assay /// 0005509 // calcium ion binding // inferred from electronic annotation /// 0016853 // isomerase activity // inferred from electronic annotation	---	gb:AF279263.1 /DB_XREF=gi:8778201 /FEA=FLmRNA /CNT=261 /TID=Mm.20943.1 /TIER=FL+Stack /STK=167 /UG=Mm.20943 /LL=27055 /UG_GENE=Fkbp9 /DEF=Mus musculus FKBP65RS mRNA, complete cds. /PROD=FKBP65RS /FL=gb:AF279263.1 gb:BC026133.1 gb:AF090334.1	0.27985	0.61027	0.55502	0.8333	0.94054	0.054217	0.26589	0.0035747	0.43411	0.46941	0.35209
1424034_at	6	Rora	RAR-related orphan receptor alpha	0006350 // transcription // inferred from electronic annotation /// 0006355 // regulation of transcription, DNA-dependent // inferred from direct assay /// 0006355 // regulation of transcription, DNA-dependent // inferred from electronic annotation /// 0006809 // nitric oxide biosynthetic process // inferred from mutant phenotype /// 0021702 // cerebellar Purkinje cell differentiation // inferred…	0005634 // nucleus // inferred from electronic annotation	0003677 // DNA binding // inferred from direct assay /// 0003677 // DNA binding // inferred from electronic annotation /// 0003700 // transcription factor activity // inferred from direct assay /// 0003700 // transcription factor activity // not recorded /// 0003700 // transcription factor activity // inferred from electronic annotation /// 0003707 // steroid hormone receptor activity // inferred…	Nuclear_Receptors // GenMAPP	gb:BC003757.1 /DB_XREF=gi:13277716 /FEA=FLmRNA /CNT=81 /TID=Mm.8858.2 /TIER=FL+Stack /STK=60 /UG=Mm.8858 /LL=19883 /UG_GENE=Rora /DEF=Mus musculus, RAR-related orphan receptor alpha, clone MGC:5892 IMAGE:3592667, mRNA, complete cds. /PROD=RAR-related orphan receptor alpha /FL=gb:BC003757.1	0.47027	0.50276	0.54317	0.95532	0.79255	0.16062	0.41359	0.10824	0.66153	0.37548	0.48435
1433944_at	6	Hectd2	HECT domain containing 2	0006464 // protein modification process // inferred from electronic annotation /// 0019941 // modification-dependent protein catabolic process // inferred from electronic annotation	0005622 // intracellular // inferred from electronic annotation	0016874 // ligase activity // inferred from electronic annotation /// 0016881 // acid-amino acid ligase activity // inferred from electronic annotation	---	gb:AV256030 /DB_XREF=gi:15405334 /DB_XREF=AV256030 /CLONE=4921524L07 /FEA=EST /CNT=58 /TID=Mm.61107.1 /TIER=Stack /STK=50 /UG=Mm.61107 /LL=107362 /UG_GENE=AW212605 /UG_TITLE=expressed sequence AW212605	0.55494	0.60356	0.52179	0.63965	0.70534	-0.042288	0.17695	-0.25865	0.62547	0.1014	0.26694
1434360_s_at	6	LOC632664 /// Ptprg	similar to protein tyrosine phosphatase, receptor type, G /// protein tyrosine phosphatase, receptor type, G	0006470 // protein amino acid dephosphorylation // inferred from electronic annotation /// 0016311 // dephosphorylation // inferred from electronic annotation	0016020 // membrane // inferred from electronic annotation /// 0016021 // integral to membrane // inferred from electronic annotation	0004721 // phosphoprotein phosphatase activity // inferred from electronic annotation /// 0004725 // protein tyrosine phosphatase activity // inferred from electronic annotation /// 0016787 // hydrolase activity // inferred from electronic annotation /// 0016791 // phosphatase activity // inferred from electronic annotation /// 0042802 // identical protein binding // inferred from electronic anno…	---	gb:AI596632 /DB_XREF=gi:4605680 /DB_XREF=ml66e01.y1 /CLONE=IMAGE:516984 /FEA=EST /CNT=37 /TID=Mm.202333.1 /TIER=Stack /STK=34 /UG=Mm.202333 /LL=105646 /UG_GENE=AW046354 /UG_TITLE=expressed sequence AW046354	0.50645	0.32647	0.521	0.93664	0.56578	0.086125	0.19149	0.024601	0.74615	0.47847	0.49036
1435143_at	6	Elk3	ELK3, member of ETS oncogene family	0001525 // angiogenesis // inferred from mutant phenotype /// 0006350 // transcription // inferred from electronic annotation /// 0006355 // regulation of transcription, DNA-dependent // inferred from direct assay /// 0006355 // regulation of transcription, DNA-dependent // inferred from electronic annotation /// 0016481 // negative regulation of transcription // inferred from electronic annotati…	0005634 // nucleus // inferred from direct assay /// 0005634 // nucleus // inferred from electronic annotation /// 0005739 // mitochondrion // inferred from electronic annotation	0003677 // DNA binding // inferred from direct assay /// 0003677 // DNA binding // inferred from electronic annotation /// 0003700 // transcription factor activity // inferred from direct assay /// 0003700 // transcription factor activity // inferred from electronic annotation /// 0003714 // transcription corepressor activity // inferred from electronic annotation /// 0005515 // protein binding /…	---	gb:BB825801 /DB_XREF=gi:17004044 /DB_XREF=BB825801 /CLONE=G830039L12 /FEA=EST /CNT=34 /TID=Mm.220962.2 /TIER=Stack /STK=19 /UG=Mm.220962 /LL=20324 /UG_GENE=Sdpr /UG_TITLE=serum deprivation response	0.44936	0.31794	0.33604	0.7416	0.57852	0.035908	0.20461	0.0026443	0.54019	0.36321	0.38892
1438312_s_at	6	Ltbp3	latent transforming growth factor beta binding protein 3	0001501 // skeletal system development // inferred from mutant phenotype /// 0007179 // transforming growth factor beta receptor signaling pathway // inferred from mutant phenotype /// 0007179 // transforming growth factor beta receptor signaling pathway // inferred from physical interaction	0005576 // extracellular region // inferred from direct assay /// 0005576 // extracellular region // inferred from electronic annotation /// 0005578 // proteinaceous extracellular matrix // not recorded	0005488 // binding // inferred from electronic annotation /// 0005509 // calcium ion binding // inferred from electronic annotation /// 0019838 // growth factor binding // inferred from electronic annotation	---	gb:BB324823 /DB_XREF=gi:9033137 /DB_XREF=BB324823 /CLONE=B430111O16 /FEA=EST /CNT=12 /TID=Mm.182396.3 /TIER=Stack /STK=11 /UG=Mm.182396 /LL=78891 /UG_GENE=Ntkl /UG_TITLE=N-terminal kinase-like	0.65939	0.52131	0.58061	0.80503	0.64046	0.36067	0.39379	0.05282	0.63547	0.42381	0.4996
1447693_s_at	6	Neo1	neogenin	0007155 // cell adhesion // inferred from electronic annotation /// 0007520 // myoblast fusion // inferred from mutant phenotype /// 0045449 // regulation of transcription // inferred from direct assay	0005886 // plasma membrane // inferred from electronic annotation /// 0016020 // membrane // inferred from electronic annotation /// 0016021 // integral to membrane // inferred from electronic annotation	0004872 // receptor activity // inferred from physical interaction /// 0005515 // protein binding // inferred from physical interaction /// 0005515 // protein binding // inferred from electronic annotation /// 0030528 // transcription regulator activity // inferred from direct assay /// 0045296 // cadherin binding // inferred from direct assay	---	gb:BB350308 /DB_XREF=gi:9062136 /DB_XREF=BB350308 /CLONE=B930079E19 /FEA=EST /CNT=2 /TID=Mm.132212.1 /TIER=ConsEnd /STK=2 /UG=Mm.132212 /UG_TITLE=ESTs	0.4898	0.20884	0.66514	0.74957	0.83403	0.088632	0.26238	-0.13536	0.778	0.55494	0.39728
1450922_a_at	6	Tgfb2	transforming growth factor, beta 2	0000902 // cell morphogenesis // inferred from sequence or structural similarity /// 0001501 // skeletal system development // inferred from mutant phenotype /// 0001502 // cartilage condensation // inferred from genetic interaction /// 0001568 // blood vessel development // inferred from mutant phenotype /// 0001654 // eye development // inferred from sequence or structural similarity /// 000182…	0005576 // extracellular region // inferred from electronic annotation /// 0005576 // extracellular region // inferred from sequence or structural similarity /// 0005604 // basement membrane // inferred from electronic annotation /// 0005615 // extracellular space // inferred from direct assay /// 0005615 // extracellular space // inferred from electronic annotation /// 0005737 // cytoplasm // in…	0001540 // beta-amyloid binding // inferred from sequence or structural similarity /// 0005102 // receptor binding // inferred from sequence or structural similarity /// 0005160 // transforming growth factor beta receptor binding // inferred from electronic annotation /// 0005160 // transforming growth factor beta receptor binding // inferred from sequence or structural similarity /// 0005515 // …	---	gb:AW049938 /DB_XREF=gi:5910467 /DB_XREF=UI-M-BH1-ant-a-11-0-UI.s1 /CLONE=UI-M-BH1-ant-a-11-0-UI /FEA=FLmRNA /CNT=136 /TID=Mm.18213.1 /TIER=Stack /STK=23 /UG=Mm.18213 /LL=21808 /UG_GENE=Tgfb2 /UG_TITLE=transforming growth factor, beta 2 /FL=gb:BC011170.1 gb:NM_009367.1	0.40486	0.62407	0.60195	0.67429	0.92098	0.10286	0.2805	-0.24001	0.55166	0.24315	0.26916
1451789_a_at	6	Ryk	receptor-like tyrosine kinase	0006468 // protein amino acid phosphorylation // inferred from electronic annotation /// 0007409 // axonogenesis // inferred from genetic interaction /// 0016055 // Wnt receptor signaling pathway // inferred from electronic annotation /// 0048705 // skeletal system morphogenesis // inferred from mutant phenotype	0005624 // membrane fraction // inferred from direct assay /// 0005886 // plasma membrane // inferred from direct assay /// 0005887 // integral to plasma membrane // inferred from electronic annotation /// 0016020 // membrane // inferred from direct assay /// 0016020 // membrane // inferred from electronic annotation /// 0016021 // integral to membrane // inferred from electronic annotation	0000166 // nucleotide binding // inferred from electronic annotation /// 0004672 // protein kinase activity // inferred from electronic annotation /// 0004713 // protein tyrosine kinase activity // inferred from direct assay /// 0004713 // protein tyrosine kinase activity // inferred from electronic annotation /// 0004714 // transmembrane receptor protein tyrosine kinase activity // inferred from…	---	gb:M98547.1 /DB_XREF=gi:200875 /GEN=RYK /FEA=FLmRNA /CNT=11 /TID=Mm.3860.1 /TIER=FL /STK=1 /UG=Mm.3860 /LL=20187 /DEF=Mouse growth factor receptor (RYK) mRNA, complete cds. /PROD=growth factor receptor /FL=gb:M98547.1 gb:L02210.1	0.63571	0.42294	0.53215	0.8168	0.59877	0.13363	0.22687	0.11305	0.54449	0.26631	0.35289
1452398_at	6	Plce1	phospholipase C, epsilon 1	0000187 // activation of MAPK activity // inferred from electronic annotation /// 0000187 // activation of MAPK activity // inferred from sequence or structural similarity /// 0006629 // lipid metabolic process // inferred from electronic annotation /// 0007165 // signal transduction // inferred from electronic annotation /// 0007200 // activation of phospholipase C activity by G-protein coupled …	0000139 // Golgi membrane // inferred from electronic annotation /// 0005622 // intracellular // inferred from electronic annotation /// 0005624 // membrane fraction // inferred from electronic annotation /// 0005624 // membrane fraction // inferred from sequence or structural similarity /// 0005737 // cytoplasm // inferred from electronic annotation /// 0005794 // Golgi apparatus // inferred fro…	0004435 // phosphoinositide phospholipase C activity // inferred from electronic annotation /// 0004435 // phosphoinositide phospholipase C activity // inferred from sequence or structural similarity /// 0004629 // phospholipase C activity // inferred from electronic annotation /// 0004629 // phospholipase C activity // inferred from sequence or structural similarity /// 0004871 // signal transdu…	---	gb:AV306884 /DB_XREF=gi:15405975 /DB_XREF=AV306884 /CLONE=5730547K05 /FEA=mRNA /CNT=36 /TID=Mm.34031.1 /TIER=Stack /STK=8 /UG=Mm.34031 /LL=74055 /UG_GENE=Plce1 /UG_TITLE=phospholipase C, epsilon 1	0.55066	0.78811	0.5508	0.75265	0.82908	0.10195	0.25036	0.041101	0.59561	0.33132	0.37188
1453084_s_at	6	Col22a1	collagen, type XXII, alpha 1	---	---	---	---	gb:AK010095.1 /DB_XREF=gi:12845301 /FEA=mRNA /CNT=15 /TID=Mm.24301.1 /TIER=Stack /STK=8 /UG=Mm.24301 /LL=69700 /UG_GENE=2310067L16Rik /UG_TITLE=RIKEN cDNA 2310067L16 gene /DEF=Mus musculus adult male tongue cDNA, RIKEN full-length enriched library, clone:2310067L16:related to COLLAGEN ALPHA 1(IX) CHAIN PRECURSOR (FRAGMENT), full insert sequence.	0.15218	0.0038663	0.68161	1.0229	0.57671	0.12292	0.094644	-0.060907	0.61849	0.55819	0.3449
1455688_at	6	Ddr2	discoidin domain receptor family, member 2	0001558 // regulation of cell growth // inferred from electronic annotation /// 0006468 // protein amino acid phosphorylation // inferred from electronic annotation /// 0007155 // cell adhesion // inferred from electronic annotation /// 0007169 // transmembrane receptor protein tyrosine kinase signaling pathway // inferred from direct assay /// 0007169 // transmembrane receptor protein tyrosine k…	0005887 // integral to plasma membrane // inferred from electronic annotation /// 0016020 // membrane // inferred from electronic annotation /// 0016021 // integral to membrane // inferred from electronic annotation	0000166 // nucleotide binding // inferred from electronic annotation /// 0004672 // protein kinase activity // inferred from electronic annotation /// 0004713 // protein tyrosine kinase activity // inferred from electronic annotation /// 0004714 // transmembrane receptor protein tyrosine kinase activity // inferred from electronic annotation /// 0004872 // receptor activity // inferred from elect…	---	gb:BB795075 /DB_XREF=gi:16964694 /DB_XREF=BB795075 /CLONE=G431003D19 /FEA=EST /CNT=12 /TID=Mm.200798.1 /TIER=Stack /STK=9 /UG=Mm.200798 /LL=98434 /UG_GENE=AI838577 /UG_TITLE=expressed sequence AI838577	0.41048	0.52049	0.57002	0.95833	0.87979	0.10221	0.29694	-0.046789	0.57126	0.31603	0.30657
1455812_x_at	6	Vasn	vasorin	---	0016020 // membrane // inferred from electronic annotation /// 0016021 // integral to membrane // inferred from electronic annotation	0005515 // protein binding // inferred from electronic annotation	---	gb:BB530515 /DB_XREF=gi:9582444 /DB_XREF=BB530515 /CLONE=E030010H10 /FEA=EST /CNT=59 /TID=Mm.23090.3 /TIER=Stack /STK=56 /UG=Mm.23090 /LL=74207 /UG_GENE=2610528G05Rik /UG_TITLE=RIKEN cDNA 2610528G05 gene	0.38393	0.69777	0.6066	0.94986	0.97362	0.077277	0.038759	-0.086574	0.48406	0.30649	0.40647
1418066_at	7	Cfl2	cofilin 2, muscle	---	0005622 // intracellular // inferred from electronic annotation /// 0005634 // nucleus // inferred from electronic annotation /// 0005737 // cytoplasm // inferred from electronic annotation /// 0005856 // cytoskeleton // inferred from electronic annotation /// 0016363 // nuclear matrix // inferred from electronic annotation	0003779 // actin binding // inferred from electronic annotation /// 0005515 // protein binding // inferred from electronic annotation	G13_Signaling_Pathway // GenMAPP	gb:NM_007688.1 /DB_XREF=gi:6671745 /GEN=Cfl2 /FEA=FLmRNA /CNT=159 /TID=Mm.3373.1 /TIER=FL+Stack /STK=30 /UG=Mm.3373 /LL=12632 /DEF=Mus musculus cofilin 2, muscle (Cfl2), mRNA. /PROD=cofilin 2, muscle /FL=gb:L29468.1 gb:BC007138.1 gb:NM_007688.1	0.40476	-0.11321	0.093056	0.069698	0.092689	-0.66582	-0.50614	-0.59006	0.39317	0.20678	0.19176
1418209_a_at	7	Pfn2	profilin 2	0007010 // cytoskeleton organization // inferred from electronic annotation /// 0030036 // actin cytoskeleton organization // inferred from electronic annotation	0005737 // cytoplasm // inferred from electronic annotation /// 0005856 // cytoskeleton // inferred from electronic annotation /// 0015629 // actin cytoskeleton // inferred from electronic annotation	0003779 // actin binding // inferred from electronic annotation /// 0005515 // protein binding // inferred from physical interaction	---	gb:NM_019410.1 /DB_XREF=gi:9506970 /GEN=Pfn2 /FEA=FLmRNA /CNT=73 /TID=Mm.20399.1 /TIER=FL+Stack /STK=28 /UG=Mm.20399 /LL=18645 /DEF=Mus musculus profilin 2 (Pfn2), mRNA. /PROD=profilin 2 /FL=gb:BC024363.1 gb:NM_019410.1	0.50443	0.016819	0.12328	0.25385	0.28438	-0.54028	-0.40718	-0.55876	1.155	0.5484	0.59757
1418210_at	7	Pfn2	profilin 2	0007010 // cytoskeleton organization // inferred from electronic annotation /// 0030036 // actin cytoskeleton organization // inferred from electronic annotation	0005737 // cytoplasm // inferred from electronic annotation /// 0005856 // cytoskeleton // inferred from electronic annotation /// 0015629 // actin cytoskeleton // inferred from electronic annotation	0003779 // actin binding // inferred from electronic annotation /// 0005515 // protein binding // inferred from physical interaction	---	gb:NM_019410.1 /DB_XREF=gi:9506970 /GEN=Pfn2 /FEA=FLmRNA /CNT=73 /TID=Mm.20399.1 /TIER=FL+Stack /STK=28 /UG=Mm.20399 /LL=18645 /DEF=Mus musculus profilin 2 (Pfn2), mRNA. /PROD=profilin 2 /FL=gb:BC024363.1 gb:NM_019410.1	0.42992	0.035745	0.13446	0.24792	0.32553	-0.47264	-0.39015	-0.5423	1.0507	0.5316	0.53338
1419383_at	7	S100b	S100 protein, beta polypeptide, neural	0006112 // energy reserve metabolic process // non-traceable author statement /// 0006874 // cellular calcium ion homeostasis // non-traceable author statement /// 0006917 // induction of apoptosis // non-traceable author statement /// 0007611 // learning or memory // inferred from mutant phenotype /// 0007613 // memory // inferred from mutant phenotype /// 0042035 // regulation of cytokine biosy…	0005576 // extracellular region // non-traceable author statement /// 0005634 // nucleus // inferred from direct assay /// 0005634 // nucleus // inferred from electronic annotation /// 0005737 // cytoplasm // non-traceable author statement /// 0005737 // cytoplasm // inferred from electronic annotation /// 0043025 // cell soma // inferred from direct assay	0005509 // calcium ion binding // non-traceable author statement /// 0005509 // calcium ion binding // inferred from electronic annotation /// 0008270 // zinc ion binding // inferred from electronic annotation /// 0008270 // zinc ion binding // inferred from sequence or structural similarity /// 0042803 // protein homodimerization activity // inferred from sequence or structural similarity /// 00…	---	gb:NM_009115.1 /DB_XREF=gi:6677838 /GEN=S100b /FEA=FLmRNA /CNT=23 /TID=Mm.212672.1 /TIER=FL+Stack /STK=10 /UG=Mm.212672 /LL=20203 /DEF=Mus musculus S100 protein, beta polypeptide, neural (S100b), mRNA. /PROD=S100 protein, beta polypeptide, neural /FL=gb:NM_009115.1	-0.11355	-0.037305	-0.2624	-0.033552	-0.30508	-0.55894	-0.64839	-0.51828	0.097315	-0.20517	-0.19608
1420827_a_at	7	Ccng1	cyclin G1	0007049 // cell cycle // inferred from electronic annotation /// 0007067 // mitosis // inferred from electronic annotation /// 0016049 // cell growth // inferred from electronic annotation /// 0051301 // cell division // inferred from electronic annotation	0005634 // nucleus // inferred from electronic annotation	---	---	gb:BG085921 /DB_XREF=gi:12568485 /DB_XREF=H3119F08-5 /CLONE=H3119F08 /FEA=FLmRNA /CNT=268 /TID=Mm.2103.1 /TIER=ConsEnd /STK=0 /UG=Mm.2103 /LL=12450 /UG_GENE=Ccng /UG_TITLE=cyclin G /FL=gb:BC005534.1 gb:L49507.1 gb:NM_009831.1	0.40612	-0.23976	-0.16766	-0.021286	0.007078	-0.77634	-0.70728	-0.5138	0.37486	0.092466	0.077626
1423025_a_at	7	Schip1	schwannomin interacting protein 1	0001822 // kidney development // inferred from mutant phenotype /// 0006807 // nitrogen compound metabolic process // inferred from mutant phenotype /// 0009791 // post-embryonic development // inferred from mutant phenotype /// 0010761 // fibroblast migration // inferred from mutant phenotype /// 0048008 // platelet-derived growth factor receptor signaling pathway // inferred from mutant phenoty…	0005737 // cytoplasm // not recorded /// 0005737 // cytoplasm // inferred from electronic annotation	0005515 // protein binding // inferred from physical interaction /// 0042803 // protein homodimerization activity // not recorded	---	gb:NM_013928.1 /DB_XREF=gi:18250281 /GEN=Schip1 /FEA=FLmRNA /CNT=2 /TID=Mm.24059.1 /TIER=FL /STK=0 /UG=Mm.24059 /LL=30953 /DEF=Mus musculus schwannomin interacting protein 1 (Schip1), mRNA. /PROD=schwannomin interacting protein 1 /FL=gb:NM_013928.1	0.22347	-0.15197	0.16492	0.13412	0.17089	-0.61018	-0.64385	-0.57906	0.61168	0.20062	0.11154
1423142_a_at	7	Gtpbp4	GTP binding protein 4	0000079 // regulation of cyclin-dependent protein kinase activity // inferred from electronic annotation /// 0000079 // regulation of cyclin-dependent protein kinase activity // inferred from sequence or structural similarity /// 0008156 // negative regulation of DNA replication // inferred from electronic annotation /// 0008156 // negative regulation of DNA replication // inferred from sequence …	0005634 // nucleus // inferred from electronic annotation /// 0005634 // nucleus // inferred from sequence or structural similarity /// 0005730 // nucleolus // inferred from electronic annotation /// 0005737 // cytoplasm // inferred from electronic annotation /// 0005737 // cytoplasm // inferred from sequence or structural similarity /// 0048471 // perinuclear region of cytoplasm // inferred from…	0000166 // nucleotide binding // inferred from electronic annotation /// 0003924 // GTPase activity // inferred from electronic annotation /// 0003924 // GTPase activity // inferred from sequence or structural similarity /// 0005515 // protein binding // inferred from electronic annotation /// 0005525 // GTP binding // inferred from electronic annotation /// 0005525 // GTP binding // inferred fro…	---	gb:AI987834 /DB_XREF=gi:5819628 /DB_XREF=um07f06.x1 /CLONE=IMAGE:2182403 /FEA=FLmRNA /CNT=127 /TID=Mm.41800.1 /TIER=Stack /STK=40 /UG=Mm.41800 /LL=69237 /UG_GENE=Gtpbp3-pending /UG_TITLE=GTP binding protein 3 /FL=gb:NM_027000.1 gb:AF325354.1 gb:BC025431.1 gb:AF348208.1	0.41742	-0.079636	0.36133	0.23245	0.10987	-0.73368	-0.5375	-0.50074	0.34867	-0.010198	-0.14959
1436993_x_at	7	Pfn2	profilin 2	0007010 // cytoskeleton organization // inferred from electronic annotation /// 0030036 // actin cytoskeleton organization // inferred from electronic annotation	0005737 // cytoplasm // inferred from electronic annotation /// 0005856 // cytoskeleton // inferred from electronic annotation /// 0015629 // actin cytoskeleton // inferred from electronic annotation	0003779 // actin binding // inferred from electronic annotation /// 0005515 // protein binding // inferred from physical interaction	---	gb:BB560492 /DB_XREF=gi:9646858 /DB_XREF=BB560492 /CLONE=E530111B09 /FEA=EST /CNT=33 /TID=Mm.20399.2 /TIER=Stack /STK=31 /UG=Mm.20399 /LL=18645 /UG_GENE=Pfn2 /UG_TITLE=profilin 2	0.38176	0.052724	0.2278	0.16765	0.26843	-0.51068	-0.53813	-0.64942	0.79531	0.3302	0.28952
1437250_at	7	Mreg	melanoregulin	0030318 // melanocyte differentiation // inferred from mutant phenotype /// 0042640 // anagen // inferred from mutant phenotype /// 0043473 // pigmentation // inferred from mutant phenotype /// 0048066 // pigmentation during development // inferred from mutant phenotype	0005886 // plasma membrane // inferred from electronic annotation /// 0016020 // membrane // inferred from electronic annotation /// 0019898 // extrinsic to membrane // inferred from electronic annotation	---	---	gb:AV298358 /DB_XREF=gi:16393041 /DB_XREF=AV298358 /CLONE=5730456N15 /FEA=EST /CNT=31 /TID=Mm.45760.1 /TIER=Stack /STK=21 /UG=Mm.45760 /LL=116971 /UG_GENE=Wdt2-pending /UG_TITLE=whn-dependent transcript 2	0.1676	-0.4871	-0.031222	-0.082621	-0.12002	-0.78145	-0.69788	-0.54081	0.42096	0.033276	0.05219
1437848_x_at	7	Adpgk	ADP-dependent glucokinase	0005975 // carbohydrate metabolic process // inferred from electronic annotation /// 0006096 // glycolysis // inferred from electronic annotation	0005576 // extracellular region // inferred from electronic annotation	0000287 // magnesium ion binding // inferred from electronic annotation /// 0016301 // kinase activity // inferred from electronic annotation /// 0016740 // transferase activity // inferred from electronic annotation /// 0016773 // phosphotransferase activity, alcohol group as acceptor // inferred from electronic annotation /// 0043843 // ADP-specific glucokinase activity // inferred from electro…	---	gb:BB490673 /DB_XREF=gi:9449300 /DB_XREF=BB490673 /CLONE=D530017A09 /FEA=EST /CNT=14 /TID=Mm.22456.2 /TIER=Stack /STK=14 /UG=Mm.22456 /LL=72141 /UG_GENE=2610017G09Rik /UG_TITLE=RIKEN cDNA 2610017G09 gene	-0.15748	-0.2573	-0.10771	-0.060387	-0.15397	-0.64358	-0.71605	-0.51991	0.055439	-0.1794	-0.34055
1437870_at	7	Slco4c1	solute carrier organic anion transporter family, member 4C1	0006810 // transport // inferred from electronic annotation /// 0006811 // ion transport // inferred from electronic annotation /// 0007275 // multicellular organismal development // inferred from electronic annotation /// 0007283 // spermatogenesis // inferred from electronic annotation /// 0015711 // organic anion transport // not recorded /// 0030154 // cell differentiation // inferred from el…	0005886 // plasma membrane // inferred from electronic annotation /// 0016020 // membrane // inferred from electronic annotation /// 0016021 // integral to membrane // inferred from electronic annotation /// 0016323 // basolateral plasma membrane // not recorded	0005215 // transporter activity // inferred from electronic annotation /// 0008514 // organic anion transmembrane transporter activity // not recorded	---	gb:AV024403 /DB_XREF=gi:16356406 /DB_XREF=AV024403 /CLONE=1200003B07 /FEA=EST /CNT=24 /TID=Mm.11662.2 /TIER=Stack /STK=13 /UG=Mm.11662 /UG_TITLE=ESTs, Weakly similar to JC7286 liver-specific organic anion transporter-1 - mouse (M.musculus)	-0.39318	-0.50144	-0.16032	0.088439	-0.2306	-0.69442	-0.67348	-0.45479	-0.043258	-0.13698	-0.36266
1437877_at	7	Ttc14	tetratricopeptide repeat domain 14	---	---	0003723 // RNA binding // inferred from electronic annotation /// 0005488 // binding // inferred from electronic annotation	mRNA_processing_binding_Reactome // GenMAPP	gb:BB711506 /DB_XREF=gi:16064675 /DB_XREF=BB711506 /CLONE=B020024M07 /FEA=EST /CNT=26 /TID=Mm.26219.3 /TIER=Stack /STK=13 /UG=Mm.26219 /LL=67535 /UG_GENE=4921507O14Rik /UG_TITLE=RIKEN cDNA 4921507O14 gene	0.30588	-0.18032	0.003947	0.22063	0.1995	-0.78394	-0.57087	-0.56468	0.42308	0.12521	0.32329
1438676_at	7	Mpa2l	macrophage activation 2 like	---	---	0003924 // GTPase activity // inferred from electronic annotation /// 0005525 // GTP binding // inferred from electronic annotation	---	gb:BM241485 /DB_XREF=gi:17876755 /DB_XREF=K0617E08-3 /CLONE=K0617E08 /FEA=EST /CNT=70 /TID=Mm.5057.2 /TIER=Stack /STK=9 /UG=Mm.5057 /LL=17472 /UG_GENE=Mpa2 /UG_TITLE=macrophage activation 2	-0.057266	-0.27644	-0.18252	0.044851	0.20957	-0.75039	-0.75122	-0.58383	-0.21023	0.16425	-0.088514
1439442_x_at	7	Yars2	tyrosyl-tRNA synthetase 2 (mitochondrial)	0006412 // translation // inferred from electronic annotation /// 0006418 // tRNA aminoacylation for protein translation // inferred from electronic annotation /// 0006437 // tyrosyl-tRNA aminoacylation // inferred from electronic annotation	0005737 // cytoplasm // inferred from electronic annotation /// 0005739 // mitochondrion // inferred from electronic annotation /// 0005739 // mitochondrion // inferred from direct assay /// 0005759 // mitochondrial matrix // inferred from electronic annotation	0000166 // nucleotide binding // inferred from electronic annotation /// 0004812 // aminoacyl-tRNA ligase activity // inferred from electronic annotation /// 0004831 // tyrosine-tRNA ligase activity // inferred from electronic annotation /// 0005515 // protein binding // inferred from electronic annotation /// 0005524 // ATP binding // inferred from electronic annotation /// 0016874 // ligase act…	---	gb:BB204225 /DB_XREF=gi:8869178 /DB_XREF=BB204225 /CLONE=A430056P07 /FEA=EST /CNT=8 /TID=Mm.37486.3 /TIER=Stack /STK=8 /UG=Mm.37486 /LL=70120 /UG_GENE=2210023C10Rik /UG_TITLE=RIKEN cDNA 2210023C10 gene	0.35334	-0.017801	0.15819	0.21072	0.058885	-0.5692	-0.61799	-0.52927	0.18335	0.11039	-0.11922
1449534_at	7	Sycp3	synaptonemal complex protein 3	0000705 // achiasmate meiosis I // inferred from direct assay /// 0007049 // cell cycle // inferred from electronic annotation /// 0007066 // female meiosis sister chromatid cohesion // inferred from direct assay /// 0007067 // mitosis // inferred from direct assay /// 0007126 // meiosis // inferred from direct assay /// 0007126 // meiosis // inferred from electronic annotation /// 0007129 // syn…	0000793 // condensed chromosome // inferred from direct assay /// 0000794 // condensed nuclear chromosome // inferred from direct assay /// 0000795 // synaptonemal complex // inferred from direct assay /// 0000800 // lateral element // inferred from direct assay /// 0000802 // transverse filament // inferred from direct assay /// 0001673 // male germ cell nucleus // inferred from direct assay ///…	0003677 // DNA binding // inferred from electronic annotation /// 0005515 // protein binding // inferred from physical interaction /// 0046982 // protein heterodimerization activity // inferred from physical interaction	---	gb:NM_011517.1 /DB_XREF=gi:6755703 /GEN=Sycp3 /FEA=FLmRNA /CNT=16 /TID=Mm.148209.1 /TIER=FL+Stack /STK=8 /UG=Mm.148209 /LL=20962 /DEF=Mus musculus synaptonemal complex protein 3 (Sycp3), mRNA. /PROD=synaptonemal complex protein 3 /FL=gb:NM_011517.1	-0.20082	-0.24471	-0.26537	0.34714	0.10151	-0.93234	-0.50848	-0.67203	0.2036	-0.24932	0.072947
1451511_at	7	Hibch	3-hydroxyisobutyryl-Coenzyme A hydrolase	0008152 // metabolic process // inferred from electronic annotation /// 0009083 // branched chain family amino acid catabolic process // inferred from electronic annotation	0005739 // mitochondrion // inferred from electronic annotation /// 0005739 // mitochondrion // inferred from direct assay	0003824 // catalytic activity // inferred from electronic annotation /// 0003860 // 3-hydroxyisobutyryl-CoA hydrolase activity // inferred from electronic annotation /// 0005515 // protein binding // inferred from electronic annotation /// 0016787 // hydrolase activity // inferred from electronic annotation	---	gb:BC026437.1 /DB_XREF=gi:20071740 /FEA=FLmRNA /CNT=39 /TID=Mm.25250.1 /TIER=FL+Stack /STK=13 /UG=Mm.25250 /DEF=Mus musculus, Similar to 3-hydroxyisobutyryl-Coenzyme A hydrolase, clone MGC:31364 IMAGE:4238681, mRNA, complete cds. /PROD=Similar to 3-hydroxyisobutyryl-Coenzyme Ahydrolase /FL=gb:BC026437.1	-0.073778	-0.14663	0.20262	0.50121	0.11359	-0.86529	-0.68158	-0.61212	0.307	0.14763	-0.07628
1455091_at	7	Ppp2r3a	protein phosphatase 2, regulatory subunit B'', alpha	---	---	0005509 // calcium ion binding // inferred from electronic annotation /// 0005515 // protein binding // not recorded /// 0005515 // protein binding // inferred from electronic annotation	---	gb:AI642021 /DB_XREF=gi:4720496 /DB_XREF=ub74g08.x1 /CLONE=IMAGE:1383518 /FEA=EST /CNT=51 /TID=Mm.28416.1 /TIER=Stack /STK=25 /UG=Mm.28416 /UG_TITLE=ESTs, Weakly similar to protein phosphatase 2 (formerly 2A), regulatory subunit B (PR72), alpha isoform and (PR 130), beta isoform; protein phosphatase 2, regulatory subunit (59 kDa) (Mus musculus) (M.musculus)	0.74341	0.27266	0.2766	0.46151	0.55511	-0.76848	-0.60874	-0.51124	0.81043	0.33981	0.34668
1455182_at	7	Kif1b	kinesin family member 1B	0007018 // microtubule-based movement // inferred from direct assay /// 0007018 // microtubule-based movement // inferred from electronic annotation /// 0007270 // nerve-nerve synaptic transmission // inferred from mutant phenotype /// 0007274 // neuromuscular synaptic transmission // inferred from mutant phenotype /// 0008089 // anterograde axon cargo transport // inferred from mutant phenotype …	0005737 // cytoplasm // inferred from electronic annotation /// 0005739 // mitochondrion // inferred from direct assay /// 0005739 // mitochondrion // inferred from electronic annotation /// 0005856 // cytoskeleton // inferred from electronic annotation /// 0005874 // microtubule // inferred from electronic annotation /// 0005875 // microtubule associated complex // inferred from direct assay ///…	0000166 // nucleotide binding // inferred from electronic annotation /// 0003774 // motor activity // inferred from electronic annotation /// 0003777 // microtubule motor activity // inferred from direct assay /// 0003777 // microtubule motor activity // inferred from electronic annotation /// 0005515 // protein binding // inferred from direct assay /// 0005524 // ATP binding // inferred from ele…	---	gb:AV104668 /DB_XREF=gi:16381875 /DB_XREF=AV104668 /CLONE=2510008K08 /FEA=EST /CNT=39 /TID=Mm.164568.1 /TIER=Stack /STK=21 /UG=Mm.164568 /LL=100123 /UG_GENE=AI448212 /UG_TITLE=expressed sequence AI448212	0.30772	-0.062942	0.12001	0.15953	0.40821	-0.64885	-0.59628	-0.5278	0.63478	0.11558	0.10998
1455938_x_at	7	Rad21	RAD21 homolog (S. pombe)	0006281 // DNA repair // inferred from electronic annotation /// 0006915 // apoptosis // inferred from electronic annotation /// 0006974 // response to DNA damage stimulus // inferred from electronic annotation /// 0007049 // cell cycle // inferred from electronic annotation /// 0007059 // chromosome segregation // inferred from electronic annotation /// 0007067 // mitosis // inferred from electr…	0000228 // nuclear chromosome // inferred from electronic annotation /// 0005634 // nucleus // inferred from electronic annotation	0005509 // calcium ion binding // inferred from electronic annotation /// 0005515 // protein binding // inferred from electronic annotation	mRNA_processing_binding_Reactome // GenMAPP	gb:AV025454 /DB_XREF=gi:4802446 /DB_XREF=AV025454 /CLONE=1200013J24 /FEA=EST /CNT=25 /TID=Mm.182628.3 /TIER=Stack /STK=24 /UG=Mm.182628 /LL=19357 /UG_GENE=Rad21 /UG_TITLE=RAD21 homolog (S. pombe)	0.061135	-0.0049883	0.12553	-0.18642	-0.084623	-0.60972	-0.50388	-0.57786	-0.068024	-0.02646	-0.24084
1457275_at	7	Synm	synemin, intermediate filament protein	---	0005624 // membrane fraction // inferred from direct assay /// 0005737 // cytoplasm // inferred from electronic annotation /// 0005856 // cytoskeleton // inferred from electronic annotation /// 0005882 // intermediate filament // not recorded /// 0005882 // intermediate filament // inferred from electronic annotation /// 0005882 // intermediate filament // inferred from sequence or structural sim…	0005198 // structural molecule activity // inferred from electronic annotation /// 0005200 // structural constituent of cytoskeleton // inferred from electronic annotation /// 0005200 // structural constituent of cytoskeleton // inferred from sequence or structural similarity /// 0005515 // protein binding // inferred from physical interaction /// 0005515 // protein binding // inferred from elect…	---	gb:AI594683 /DB_XREF=gi:4603731 /DB_XREF=vt55h01.x1 /CLONE=IMAGE:1167025 /FEA=EST /CNT=10 /TID=Mm.83561.1 /TIER=ConsEnd /STK=4 /UG=Mm.83561 /UG_TITLE=ESTs	0.53913	0.39822	0.1319	0.47372	0.42615	-0.59221	-0.45802	-0.37865	0.99388	0.72996	0.56846
1460258_at	7	Lect1	leukocyte cell derived chemotaxin 1	0007275 // multicellular organismal development // inferred from electronic annotation /// 0016525 // negative regulation of angiogenesis // inferred from mutant phenotype /// 0016525 // negative regulation of angiogenesis // not recorded /// 0030154 // cell differentiation // inferred from electronic annotation /// 0030948 // negative regulation of vascular endothelial growth factor receptor sig…	0005576 // extracellular region // not recorded /// 0005576 // extracellular region // inferred from electronic annotation /// 0016020 // membrane // inferred from electronic annotation /// 0016021 // integral to membrane // inferred from electronic annotation	---	---	gb:NM_010701.1 /DB_XREF=gi:6754527 /GEN=Lect1 /FEA=FLmRNA /CNT=18 /TID=Mm.46561.1 /TIER=FL+Stack /STK=10 /UG=Mm.46561 /LL=16840 /DEF=Mus musculus leukocyte cell derived chemotaxin 1 (Lect1), mRNA. /PROD=leukocyte cell derived chemotaxin 1 /FL=gb:NM_010701.1 gb:U43509.1	-0.059099	0.080632	0.076767	-0.088655	0.51439	-0.60695	-0.41372	-0.5046	0.53918	0.55969	0.31215
1416805_at	8	1110032E23Rik	RIKEN cDNA 1110032E23 gene	---	0005794 // Golgi apparatus // inferred from electronic annotation /// 0016020 // membrane // inferred from electronic annotation /// 0016021 // integral to membrane // inferred from electronic annotation	---	---	gb:NM_133187.1 /DB_XREF=gi:18875327 /GEN=1110032E23Rik /FEA=FLmRNA /CNT=89 /TID=Mm.33946.1 /TIER=FL+Stack /STK=69 /UG=Mm.33946 /LL=68659 /DEF=Mus musculus RIKEN cDNA 1110032E23 gene (1110032E23Rik), mRNA. /PROD=hypothetical basic protein I-19 /FL=gb:AF285091.1 gb:NM_133187.1	0.14347	0.34824	0.52644	0.61685	0.89626	-0.064008	0.079006	0.071634	0.67229	0.32654	0.37557
1417256_at	8	Mmp13	matrix metallopeptidase 13	0001666 // response to hypoxia // inferred from electronic annotation /// 0006508 // proteolysis // inferred from electronic annotation /// 0008152 // metabolic process // inferred from electronic annotation /// 0009612 // response to mechanical stimulus // inferred from electronic annotation /// 0030282 // bone mineralization // inferred from mutant phenotype /// 0030574 // collagen catabolic pr…	0005576 // extracellular region // inferred from electronic annotation /// 0005578 // proteinaceous extracellular matrix // inferred from electronic annotation /// 0005583 // fibrillar collagen // inferred from electronic annotation /// 0005615 // extracellular space // inferred from electronic annotation /// 0005764 // lysosome // inferred from electronic annotation /// 0005794 // Golgi apparatu…	0001968 // fibronectin binding // inferred from electronic annotation /// 0004222 // metalloendopeptidase activity // inferred from direct assay /// 0004222 // metalloendopeptidase activity // inferred from electronic annotation /// 0005509 // calcium ion binding // inferred from electronic annotation /// 0008233 // peptidase activity // inferred from direct assay /// 0008233 // peptidase activit…	Matrix_Metalloproteinases // GenMAPP	gb:NM_008607.1 /DB_XREF=gi:6678895 /GEN=Mmp13 /FEA=FLmRNA /CNT=65 /TID=Mm.5022.1 /TIER=FL+Stack /STK=51 /UG=Mm.5022 /LL=17386 /DEF=Mus musculus matrix metalloproteinase 13 (Mmp13), mRNA. /PROD=matrix metalloproteinase 13 /FL=gb:NM_008607.1	0.19413	0.3216	0.50549	0.85784	0.93255	-0.11674	-0.1866	0.113	0.67953	0.44129	0.30579
1419527_at	8	Comp	cartilage oligomeric matrix protein	0007155 // cell adhesion // inferred from electronic annotation	0005576 // extracellular region // inferred from electronic annotation /// 0005578 // proteinaceous extracellular matrix // inferred from electronic annotation	0005509 // calcium ion binding // inferred from electronic annotation /// 0005515 // protein binding // inferred from electronic annotation	---	gb:NM_016685.1 /DB_XREF=gi:7710009 /GEN=Comp /FEA=FLmRNA /CNT=25 /TID=Mm.45071.1 /TIER=FL+Stack /STK=9 /UG=Mm.45071 /LL=12845 /DEF=Mus musculus cartilage oligomeric matrix protein (Comp), mRNA. /PROD=cartilage oligomeric matrix protein /FL=gb:AF033530.1 gb:NM_016685.1	0.2353	0.64156	0.24585	0.34902	0.39237	0.30258	0.50666	0.26055	0.61758	0.55963	0.9931
1422640_at	8	Pcdhb9	protocadherin beta 9	0007155 // cell adhesion // inferred from electronic annotation /// 0007156 // homophilic cell adhesion // inferred from electronic annotation	0016020 // membrane // inferred from electronic annotation /// 0016021 // integral to membrane // inferred from electronic annotation	0005509 // calcium ion binding // inferred from electronic annotation /// 0005515 // protein binding // inferred from electronic annotation	---	gb:NM_053134.1 /DB_XREF=gi:16716434 /GEN=Pcdhb9 /FEA=FLmRNA /CNT=35 /TID=Mm.125898.1 /TIER=FL+Stack /STK=23 /UG=Mm.125898 /LL=93880 /DEF=Mus musculus protocadherin beta 9 (Pcdhb9), mRNA. /PROD=protocadherin beta 9 /FL=gb:NM_053134.1 gb:AY013791.1	0.30598	-0.025145	0.43019	0.6969	0.57477	0.10762	0.20367	0.025568	0.64349	0.3699	0.47486
1433658_x_at	8	Pcbp4	poly(rC) binding protein 4	---	0005737 // cytoplasm // inferred from electronic annotation /// 0030529 // ribonucleoprotein complex // inferred from electronic annotation	0003677 // DNA binding // inferred from electronic annotation /// 0003723 // RNA binding // inferred from electronic annotation	mRNA_processing_binding_Reactome // GenMAPP	gb:AV300794 /DB_XREF=gi:16393353 /DB_XREF=AV300794 /CLONE=5730488K16 /FEA=EST /CNT=82 /TID=Mm.29707.3 /TIER=Stack /STK=76 /UG=Mm.29707 /LL=59092 /UG_GENE=Pcbp4 /UG_TITLE=poly(rC) binding protein 4	0.39228	0.21661	0.33399	0.56756	0.62137	-0.21765	-0.083156	-0.31669	0.56106	0.25002	0.2856
1433782_at	8	Cldn12	claudin 12	0016338 // calcium-independent cell-cell adhesion // inferred from sequence or structural similarity	0005886 // plasma membrane // inferred from electronic annotation /// 0005923 // tight junction // inferred from electronic annotation /// 0005923 // tight junction // inferred from sequence or structural similarity /// 0016020 // membrane // inferred from electronic annotation /// 0016021 // integral to membrane // inferred from electronic annotation /// 0030054 // cell junction // inferred from…	0005198 // structural molecule activity // inferred from electronic annotation /// 0042802 // identical protein binding // inferred from sequence or structural similarity	---	gb:AW554231 /DB_XREF=gi:7199654 /DB_XREF=L0237F04-3 /CLONE=L0237F04 /FEA=EST /CNT=90 /TID=Mm.40132.1 /TIER=Stack /STK=61 /UG=Mm.40132 /UG_TITLE=ESTs, Highly similar to CLDC_HUMAN CLAUDIN-12 (H.sapiens)	0.37791	0.044543	0.40341	0.67705	0.57845	-0.099518	-0.27577	-0.25282	0.58205	0.31699	0.21833
1434931_at	8	Neo1	neogenin	0007155 // cell adhesion // inferred from electronic annotation /// 0007520 // myoblast fusion // inferred from mutant phenotype /// 0045449 // regulation of transcription // inferred from direct assay	0005886 // plasma membrane // inferred from electronic annotation /// 0016020 // membrane // inferred from electronic annotation /// 0016021 // integral to membrane // inferred from electronic annotation	0004872 // receptor activity // inferred from physical interaction /// 0005515 // protein binding // inferred from physical interaction /// 0005515 // protein binding // inferred from electronic annotation /// 0030528 // transcription regulator activity // inferred from direct assay /// 0045296 // cadherin binding // inferred from direct assay	---	gb:BB667778 /DB_XREF=gi:16399227 /DB_XREF=BB667778 /CLONE=C730040J06 /FEA=EST /CNT=51 /TID=Mm.45976.1 /TIER=Stack /STK=22 /UG=Mm.45976 /UG_TITLE=ESTs	0.25788	0.27	0.52957	0.68643	0.75687	0.17052	0.30042	0.0083008	0.58537	0.2821	0.34828
1436569_at	8	Prex2	phosphatidylinositol-3,4,5-trisphosphate-dependent Rac exchange factor 2	0007186 // G-protein coupled receptor protein signaling pathway // not recorded /// 0007186 // G-protein coupled receptor protein signaling pathway // inferred from electronic annotation /// 0007242 // intracellular signaling cascade // inferred from electronic annotation /// 0035023 // regulation of Rho protein signal transduction // inferred from electronic annotation	0005622 // intracellular // inferred from electronic annotation	0005085 // guanyl-nucleotide exchange factor activity // inferred from electronic annotation /// 0005089 // Rho guanyl-nucleotide exchange factor activity // inferred from electronic annotation /// 0005515 // protein binding // inferred from electronic annotation /// 0030675 // Rac GTPase activator activity // not recorded /// 0030675 // Rac GTPase activator activity // inferred from electronic a…	---	gb:BB360125 /DB_XREF=gi:16405856 /DB_XREF=BB360125 /CLONE=C030045D06 /FEA=EST /CNT=19 /TID=Mm.123247.1 /TIER=Stack /STK=8 /UG=Mm.123247 /LL=98308 /UG_GENE=AI316880 /UG_TITLE=expressed sequence AI316880	0.5039	0.060675	0.61901	0.74017	0.71205	-0.37405	-0.067328	-0.2292	0.5372	0.22316	0.1555
1436698_x_at	8	Tmem204	transmembrane protein 204	---	0005886 // plasma membrane // inferred from electronic annotation /// 0005912 // adherens junction // inferred from electronic annotation /// 0016020 // membrane // inferred from electronic annotation /// 0016021 // integral to membrane // inferred from electronic annotation /// 0030054 // cell junction // inferred from electronic annotation	---	---	gb:AV167328 /DB_XREF=gi:5373765 /DB_XREF=AV167328 /CLONE=3110053I18 /FEA=EST /CNT=8 /TID=Mm.34379.2 /TIER=Stack /STK=8 /UG=Mm.34379 /UG_TITLE=ESTs, Moderately similar to hypothetical protein FLJ20898 (Homo sapiens) (H.sapiens)	0.13289	-0.22452	0.55375	0.63859	0.74375	-0.0031667	0.040789	-0.2185	0.47358	0.10357	0.30407
1437387_at	8	Susd5	sushi domain containing 5	---	---	---	---	gb:AV226398 /DB_XREF=gi:16385326 /DB_XREF=AV226398 /CLONE=3930402D03 /FEA=EST /CNT=19 /TID=Mm.184472.1 /TIER=Stack /STK=19 /UG=Mm.184472 /UG_TITLE=ESTs	0.17945	0.17101	0.40722	0.37724	0.60421	-0.21673	0.078896	-0.42065	0.77668	0.5969	0.56029
1443219_at	8	---	---	---	---	---	---	gb:BM232535 /DB_XREF=gi:17867805 /DB_XREF=K0324F08-3 /CLONE=K0324F08 /FEA=EST /CNT=3 /TID=Mm.217158.1 /TIER=ConsEnd /STK=3 /UG=Mm.217158 /UG_TITLE=ESTs	0.49341	0.42305	0.13076	0.52998	0.50884	-0.18849	-0.004732	-0.09314	0.63739	0.46824	0.51647
1448548_at	8	Tulp4	tubby like protein 4	0007242 // intracellular signaling cascade // inferred from electronic annotation /// 0019941 // modification-dependent protein catabolic process // inferred from electronic annotation	0005737 // cytoplasm // not recorded /// 0005737 // cytoplasm // inferred from electronic annotation	0005515 // protein binding // inferred from electronic annotation	---	gb:NM_054040.1 /DB_XREF=gi:16905076 /GEN=Tulp4 /FEA=FLmRNA /CNT=128 /TID=Mm.28251.1 /TIER=FL+Stack /STK=60 /UG=Mm.28251 /LL=68842 /DEF=Mus musculus tubby like protein 4 (Tulp4), mRNA. /PROD=tubby like protein 4 /FL=gb:NM_054040.1 gb:AF219945.1	0.42535	0.40869	0.4387	0.60037	0.70137	-0.13458	0.15957	-0.066682	0.66795	0.29369	0.36675
1450932_s_at	8	Dock9	dedicator of cytokinesis 9	---	0012505 // endomembrane system // inferred from electronic annotation /// 0016020 // membrane // inferred from electronic annotation	0005085 // guanyl-nucleotide exchange factor activity // inferred from electronic annotation /// 0005089 // Rho guanyl-nucleotide exchange factor activity // inferred from direct assay /// 0005525 // GTP binding // inferred from electronic annotation /// 0017048 // Rho GTPase binding // inferred from physical interaction /// 0051020 // GTPase binding // inferred from electronic annotation	---	gb:BB795072 /DB_XREF=gi:16964691 /DB_XREF=BB795072 /CLONE=G431003D15 /FEA=FLmRNA /CNT=82 /TID=Mm.24477.1 /TIER=Stack /STK=20 /UG=Mm.24477 /LL=105445 /UG_GENE=AA959601 /UG_TITLE=expressed sequence AA959601 /FL=gb:BC009134.1 gb:NM_134074.1	0.39372	0.3809	0.29689	0.61665	0.55964	-0.12643	-0.19777	-0.19654	0.52925	0.21568	0.25377
1451344_at	8	Tmem119	transmembrane protein 119	---	0016020 // membrane // inferred from electronic annotation /// 0016021 // integral to membrane // inferred from electronic annotation	---	---	gb:BC025600.1 /DB_XREF=gi:19343895 /FEA=FLmRNA /CNT=83 /TID=Mm.41681.1 /TIER=FL+Stack /STK=33 /UG=Mm.41681 /DEF=Mus musculus, clone MGC:38046 IMAGE:5250899, mRNA, complete cds. /PROD=Unknown (protein for MGC:38046) /FL=gb:BC025600.1	0.32041	0.48781	0.60626	0.65955	0.89094	0.059646	0.16093	-0.023764	0.48341	0.3399	0.26423
1452985_at	8	Uaca	uveal autoantigen with coiled-coil domains and ankyrin repeats	0008630 // DNA damage response, signal transduction resulting in induction of apoptosis // inferred from mutant phenotype /// 0008631 // induction of apoptosis by oxidative stress // inferred from mutant phenotype /// 0009411 // response to UV // inferred from mutant phenotype /// 0042307 // positive regulation of protein import into nucleus // inferred from mutant phenotype /// 0042347 // negati…	0005624 // membrane fraction // inferred from direct assay /// 0005625 // soluble fraction // inferred from direct assay /// 0005634 // nucleus // inferred from direct assay /// 0005634 // nucleus // inferred from electronic annotation /// 0005635 // nuclear envelope // inferred from direct assay /// 0005737 // cytoplasm // inferred from direct assay /// 0005737 // cytoplasm // inferred from elec…	0005515 // protein binding // inferred from physical interaction	---	gb:BF466442 /DB_XREF=gi:11535625 /DB_XREF=UI-M-CG0p-bqy-e-08-0-UI.s1 /CLONE=UI-M-CG0p-bqy-e-08-0-UI /FEA=mRNA /CNT=46 /TID=Mm.68819.1 /TIER=Stack /STK=15 /UG=Mm.68819 /LL=72565 /UG_GENE=2700059D02Rik /UG_TITLE=RIKEN cDNA 2700059D02 gene	0.3214	0.20524	0.39443	0.48006	0.50344	-0.025738	0.20937	-0.15848	0.89712	0.5924	0.62543
1455516_at	8	---	---	---	---	---	---	gb:BG065199 /DB_XREF=gi:12547762 /DB_XREF=H3028D07-3 /CLONE=H3028D07 /FEA=EST /CNT=15 /TID=Mm.102025.1 /TIER=Stack /STK=12 /UG=Mm.102025 /UG_TITLE=ESTs	0.16073	0.22759	0.38819	0.56305	0.68955	0.033573	-0.12785	-0.18163	0.56138	0.26793	0.11547
1455521_at	8	Klf12	Kruppel-like factor 12	0000122 // negative regulation of transcription from RNA polymerase II promoter // not recorded /// 0000122 // negative regulation of transcription from RNA polymerase II promoter // inferred from electronic annotation /// 0006350 // transcription // inferred from electronic annotation /// 0006355 // regulation of transcription, DNA-dependent // inferred from direct assay /// 0045449 // regulatio…	0005622 // intracellular // inferred from electronic annotation /// 0005634 // nucleus // inferred from electronic annotation	0003676 // nucleic acid binding // inferred from electronic annotation /// 0003677 // DNA binding // inferred from direct assay /// 0003677 // DNA binding // not recorded /// 0003677 // DNA binding // inferred from sequence or structural similarity /// 0003677 // DNA binding // inferred from electronic annotation /// 0003700 // transcription factor activity // inferred from direct assay /// 00037…	---	gb:BB753447 /DB_XREF=gi:16183945 /DB_XREF=BB753447 /CLONE=G270031A01 /FEA=EST /CNT=13 /TID=Mm.25852.1 /TIER=Stack /STK=12 /UG=Mm.25852 /UG_TITLE=ESTs	0.072987	0.2537	0.50451	0.78503	0.77227	-0.09028	0.033301	-0.21424	0.53762	0.13466	0.30902
1455554_at	8	A830039N20Rik	RIKEN cDNA A830039N20 gene	---	---	---	---	gb:BB269387 /DB_XREF=gi:16400545 /DB_XREF=BB269387 /CLONE=A830039N20 /FEA=EST /CNT=23 /TID=Mm.39513.1 /TIER=Stack /STK=11 /UG=Mm.39513 /UG_TITLE=ESTs	0.34194	0.57132	0.27111	0.70991	0.64398	-0.10464	0.016316	-0.13017	0.54378	0.22938	0.37042
1459971_at	8	Kcnt2	potassium channel, subfamily T, member 2	0006813 // potassium ion transport // not recorded /// 0006813 // potassium ion transport // inferred from electronic annotation	0005886 // plasma membrane // not recorded /// 0016020 // membrane // inferred from electronic annotation	0005267 // potassium channel activity // not recorded /// 0015269 // calcium-activated potassium channel activity // inferred from electronic annotation	---	gb:AV133559 /DB_XREF=gi:5319289 /DB_XREF=AV133559 /CLONE=2810001B17 /FEA=EST /CNT=2 /TID=Mm.53643.1 /TIER=ConsEnd /STK=2 /UG=Mm.53643 /UG_TITLE=ESTs	0.090888	-0.13151	0.25262	0.59983	0.60572	-0.27895	0.02545	-0.24782	0.5514	0.15324	0.3194
1416035_at	9	Hif1a	hypoxia inducible factor 1, alpha subunit	0001525 // angiogenesis // inferred from mutant phenotype /// 0001666 // response to hypoxia // inferred from direct assay /// 0001666 // response to hypoxia // not recorded /// 0001666 // response to hypoxia // inferred from sequence or structural similarity /// 0001755 // neural crest cell migration // inferred from mutant phenotype /// 0001837 // epithelial to mesenchymal transition // inferre…	0005634 // nucleus // inferred from direct assay /// 0005634 // nucleus // inferred from electronic annotation /// 0005634 // nucleus // inferred from sequence or structural similarity /// 0005667 // transcription factor complex // not recorded /// 0005737 // cytoplasm // inferred from electronic annotation /// 0009434 // microtubule-based flagellum // inferred from direct assay	0003677 // DNA binding // inferred from direct assay /// 0003677 // DNA binding // inferred from genetic interaction /// 0003677 // DNA binding // inferred from electronic annotation /// 0003700 // transcription factor activity // inferred from direct assay /// 0003700 // transcription factor activity // not recorded /// 0003700 // transcription factor activity // inferred from electronic annotat…	---	gb:AV370372 /DB_XREF=gi:15406791 /DB_XREF=AV370372 /CLONE=9030216D13 /FEA=FLmRNA /CNT=281 /TID=Mm.3879.1 /TIER=Stack /STK=19 /UG=Mm.3879 /LL=15251 /UG_GENE=Hif1a /UG_TITLE=hypoxia inducible factor 1, alpha subunit /FL=gb:BC026139.1 gb:NM_010431.1 gb:AF003695.1	1.0602	0.63372	0.65209	1.3449	1.1091	0.0012043	-0.024354	-0.11846	0.40121	0.22361	0.10937
1418941_at	9	Pcdhb22	protocadherin beta 22	0007155 // cell adhesion // inferred from electronic annotation /// 0007156 // homophilic cell adhesion // inferred from electronic annotation	0016020 // membrane // inferred from electronic annotation /// 0016021 // integral to membrane // inferred from electronic annotation	0005509 // calcium ion binding // inferred from electronic annotation /// 0005515 // protein binding // inferred from electronic annotation	---	gb:NM_053147.1 /DB_XREF=gi:16716438 /GEN=Pcdhb22 /FEA=FLmRNA /CNT=24 /TID=Mm.17404.1 /TIER=FL+Stack /STK=16 /UG=Mm.17404 /LL=93893 /DEF=Mus musculus protocadherin beta 22 (Pcdhb22), mRNA. /PROD=protocadherin beta 22 /FL=gb:NM_053147.1 gb:AF326315.1 gb:AY013784.1	0.5959	0.53689	0.51197	1.3476	0.96797	0.16106	0.055992	-0.040388	0.29768	0.35057	0.1721
1420725_at	9	Tmlhe	trimethyllysine hydroxylase, epsilon	0045329 // carnitine biosynthetic process // inferred from direct assay /// 0045329 // carnitine biosynthetic process // inferred from electronic annotation /// 0055114 // oxidation reduction // inferred from electronic annotation	0005739 // mitochondrion // inferred from direct assay /// 0005739 // mitochondrion // inferred from electronic annotation /// 0005759 // mitochondrial matrix // inferred from electronic annotation	0005506 // iron ion binding // inferred from electronic annotation /// 0009055 // electron carrier activity // inferred from electronic annotation /// 0016491 // oxidoreductase activity // inferred from electronic annotation /// 0016702 // oxidoreductase activity, acting on single donors with incorporation of molecular oxygen, incorporation of two atoms of oxygen // inferred from direct assay ///…	---	gb:NM_138758.1 /DB_XREF=gi:20270296 /GEN=Tmlh /FEA=FLmRNA /CNT=8 /TID=Mm.139078.1 /TIER=FL /STK=3 /UG=Mm.139078 /LL=192289 /DEF=Mus musculus epsilon-trimethyllysine 2-oxoglutarate dioxygenase (Tmlh), mRNA. /PROD=epsilon-trimethyllysine 2-oxoglutaratedioxygenase /FL=gb:NM_138758.1 gb:AY033513.1 gb:BC010495.1	0.49216	0.36338	1.0338	1.3822	1.2634	-0.22141	-0.1604	-0.010342	0.26169	0.30483	-0.19431
1420726_x_at	9	Tmlhe	trimethyllysine hydroxylase, epsilon	0045329 // carnitine biosynthetic process // inferred from direct assay /// 0045329 // carnitine biosynthetic process // inferred from electronic annotation /// 0055114 // oxidation reduction // inferred from electronic annotation	0005739 // mitochondrion // inferred from direct assay /// 0005739 // mitochondrion // inferred from electronic annotation /// 0005759 // mitochondrial matrix // inferred from electronic annotation	0005506 // iron ion binding // inferred from electronic annotation /// 0009055 // electron carrier activity // inferred from electronic annotation /// 0016491 // oxidoreductase activity // inferred from electronic annotation /// 0016702 // oxidoreductase activity, acting on single donors with incorporation of molecular oxygen, incorporation of two atoms of oxygen // inferred from direct assay ///…	---	gb:NM_138758.1 /DB_XREF=gi:20270296 /GEN=Tmlh /FEA=FLmRNA /CNT=8 /TID=Mm.139078.1 /TIER=FL /STK=3 /UG=Mm.139078 /LL=192289 /DEF=Mus musculus epsilon-trimethyllysine 2-oxoglutarate dioxygenase (Tmlh), mRNA. /PROD=epsilon-trimethyllysine 2-oxoglutaratedioxygenase /FL=gb:NM_138758.1 gb:AY033513.1 gb:BC010495.1	0.55155	0.3455	1.0026	1.388	1.2181	-0.28487	-0.24835	-0.32213	0.22803	0.31407	-0.14782
1421106_at	9	Jag1	jagged 1	0002011 // morphogenesis of an epithelial sheet // inferred from mutant phenotype /// 0007154 // cell communication // inferred from electronic annotation /// 0007219 // Notch signaling pathway // inferred from electronic annotation /// 0007275 // multicellular organismal development // inferred from electronic annotation /// 0009887 // organ morphogenesis // inferred from mutant phenotype /// 00…	0005886 // plasma membrane // inferred from direct assay /// 0016020 // membrane // inferred from electronic annotation /// 0016021 // integral to membrane // inferred from electronic annotation	0005112 // Notch binding // inferred from physical interaction /// 0005509 // calcium ion binding // non-traceable author statement /// 0005509 // calcium ion binding // inferred from electronic annotation /// 0005515 // protein binding // inferred from physical interaction	---	gb:AA880220 /DB_XREF=gi:2989203 /DB_XREF=vx39c04.r1 /CLONE=IMAGE:1277574 /FEA=FLmRNA /CNT=34 /TID=Mm.87380.1 /TIER=ConsEnd /STK=0 /UG=Mm.87380 /LL=16449 /UG_GENE=Jag1 /UG_TITLE=jagged 1 /FL=gb:NM_013822.1 gb:AF171092.1	0.55488	0.56381	0.58161	0.9544	0.80457	-0.14759	0.047928	-0.041832	0.26108	0.12495	0.074678
1423516_a_at	9	Nid2	nidogen 2	0007155 // cell adhesion // inferred from electronic annotation /// 0007160 // cell-matrix adhesion // inferred from direct assay /// 0007160 // cell-matrix adhesion // inferred from physical interaction /// 0007160 // cell-matrix adhesion // inferred from electronic annotation /// 0008218 // bioluminescence // inferred from electronic annotation /// 0018298 // protein-chromophore linkage // infe…	0005576 // extracellular region // inferred from electronic annotation /// 0005578 // proteinaceous extracellular matrix // inferred from direct assay /// 0005578 // proteinaceous extracellular matrix // inferred from electronic annotation /// 0005604 // basement membrane // inferred from direct assay /// 0005604 // basement membrane // inferred from physical interaction /// 0005604 // basement m…	0005509 // calcium ion binding // inferred from electronic annotation /// 0005515 // protein binding // inferred from physical interaction /// 0005515 // protein binding // inferred from electronic annotation	---	gb:BB781435 /DB_XREF=gi:16942135 /DB_XREF=BB781435 /CLONE=G430073G10 /FEA=FLmRNA /CNT=340 /TID=Mm.20348.2 /TIER=Stack /STK=13 /UG=Mm.20348 /LL=18074 /UG_GENE=Nid2 /UG_TITLE=nidogen 2 /FL=gb:AY074820.1 gb:NM_134085.1	0.62713	0.4995	0.52617	0.94168	1.163	-0.38353	-0.21906	-0.35855	0.49585	0.44226	0.17191
1424556_at	9	Pycr1	pyrroline-5-carboxylate reductase 1	0006561 // proline biosynthetic process // inferred from electronic annotation /// 0008152 // metabolic process // inferred from electronic annotation /// 0008652 // cellular amino acid biosynthetic process // inferred from electronic annotation /// 0034599 // cellular response to oxidative stress // inferred from sequence or structural similarity /// 0055114 // oxidation reduction // inferred fr…	0005739 // mitochondrion // inferred from direct assay /// 0005739 // mitochondrion // inferred from electronic annotation /// 0005739 // mitochondrion // inferred from sequence or structural similarity	0003824 // catalytic activity // inferred from electronic annotation /// 0004735 // pyrroline-5-carboxylate reductase activity // inferred from electronic annotation /// 0005488 // binding // inferred from electronic annotation /// 0016491 // oxidoreductase activity // inferred from electronic annotation	---	gb:BC006727.1 /DB_XREF=gi:13879493 /FEA=FLmRNA /CNT=49 /TID=Mm.33650.1 /TIER=FL+Stack /STK=25 /UG=Mm.33650 /DEF=Mus musculus, Similar to pyrroline-5-carboxylate reductase 1, clone MGC:11688 IMAGE:3962093, mRNA, complete cds. /PROD=Similar to pyrroline-5-carboxylate reductase 1 /FL=gb:BC006727.1	0.37779	0.55333	0.61785	0.90986	1.2177	-0.16955	-0.068571	-0.13573	0.28121	0.33666	0.15226
1427418_a_at	9	Hif1a	hypoxia inducible factor 1, alpha subunit	0001525 // angiogenesis // inferred from mutant phenotype /// 0001666 // response to hypoxia // inferred from direct assay /// 0001666 // response to hypoxia // not recorded /// 0001666 // response to hypoxia // inferred from sequence or structural similarity /// 0001755 // neural crest cell migration // inferred from mutant phenotype /// 0001837 // epithelial to mesenchymal transition // inferre…	0005634 // nucleus // inferred from direct assay /// 0005634 // nucleus // inferred from electronic annotation /// 0005634 // nucleus // inferred from sequence or structural similarity /// 0005667 // transcription factor complex // not recorded /// 0005737 // cytoplasm // inferred from electronic annotation /// 0009434 // microtubule-based flagellum // inferred from direct assay	0003677 // DNA binding // inferred from direct assay /// 0003677 // DNA binding // inferred from genetic interaction /// 0003677 // DNA binding // inferred from electronic annotation /// 0003700 // transcription factor activity // inferred from direct assay /// 0003700 // transcription factor activity // not recorded /// 0003700 // transcription factor activity // inferred from electronic annotat…	---	gb:X95580.1 /DB_XREF=gi:1430864 /GEN=HIF-1alpha /FEA=mRNA /CNT=13 /TID=Mm.3879.2 /TIER=ConsEnd /STK=1 /UG=Mm.3879 /LL=15251 /DEF=M.musculus mRNA for hypoxia-inducible factor I alpha. /PROD=hypoxia-inducible factor one alpha	0.82559	0.73312	0.59471	1.2387	1.0836	-0.10094	-0.20521	-0.20478	0.36311	0.19564	0.21956
1428795_at	9	1110021L09Rik	RIKEN cDNA 1110021L09 gene	0055085 // transmembrane transport // inferred from electronic annotation	---	---	---	gb:BB767129 /DB_XREF=gi:16194463 /DB_XREF=BB767129 /CLONE=G370070A03 /FEA=mRNA /CNT=29 /TID=Mm.41698.1 /TIER=Stack /STK=21 /UG=Mm.41698 /LL=76306 /UG_GENE=1110021L09Rik /UG_TITLE=RIKEN cDNA 1110021L09 gene	0.51705	0.41642	0.67583	1.0409	0.99131	0.082134	-0.028341	0.0074237	0.34031	0.30055	0.20046
1429417_at	9	Chsy3	chondroitin sulfate synthase 3	---	0005794 // Golgi apparatus // inferred from electronic annotation /// 0016020 // membrane // inferred from electronic annotation /// 0016021 // integral to membrane // inferred from electronic annotation /// 0032580 // Golgi cisterna membrane // inferred from electronic annotation	0016740 // transferase activity // inferred from electronic annotation /// 0016758 // transferase activity, transferring hexosyl groups // inferred from electronic annotation /// 0046872 // metal ion binding // inferred from electronic annotation /// 0047238 // glucuronosyl-N-acetylgalactosaminyl-proteoglycan 4-beta-N-acetylgalactosaminyltransferase activity // inferred from electronic annotation…	---	gb:AK019528.1 /DB_XREF=gi:12859793 /FEA=mRNA /CNT=32 /TID=Mm.84007.1 /TIER=Stack /STK=23 /UG=Mm.84007 /LL=78923 /UG_GENE=4833446K15Rik /UG_TITLE=RIKEN cDNA 4833446K15 gene /DEF=Mus musculus 0 day neonate head cDNA, RIKEN full-length enriched library, clone:4833446K15:homolog to KIAA0990 PROTEIN, full insert sequence.	0.78104	0.73191	0.50853	1.1953	1.0199	-0.58806	-0.072151	-0.52223	0.46789	0.44925	0.28174
1435606_at	9	Gal3st4	galactose-3-O-sulfotransferase 4	0009058 // biosynthetic process // inferred from electronic annotation /// 0009101 // glycoprotein biosynthetic process // not recorded	0005624 // membrane fraction // inferred from electronic annotation /// 0005794 // Golgi apparatus // inferred from electronic annotation /// 0016021 // integral to membrane // inferred from electronic annotation	0001733 // galactosylceramide sulfotransferase activity // inferred from electronic annotation /// 0050694 // galactose 3-O-sulfotransferase activity // not recorded	---	gb:BF147815 /DB_XREF=gi:11029210 /DB_XREF=us41h10.x1 /CLONE=IMAGE:3169699 /FEA=EST /CNT=18 /TID=Mm.74204.1 /TIER=Stack /STK=15 /UG=Mm.74204 /UG_TITLE=ESTs, Weakly similar to hypothetical protein FLJ12116 (Homo sapiens) (H.sapiens)	0.52653	0.76061	0.55244	1.0119	0.72258	-0.11068	-0.095925	-0.059316	0.22097	0.18927	0.068177
1437950_at	9	Fam149a	family with sequence similarity 149, member A	---	---	---	---	gb:BB818275 /DB_XREF=gi:16990904 /DB_XREF=BB818275 /CLONE=G730044G17 /FEA=EST /CNT=18 /TID=Mm.213405.1 /TIER=Stack /STK=13 /UG=Mm.213405 /UG_TITLE=ESTs	0.62045	0.30908	0.55591	1.183	0.95794	-0.13173	-0.025047	-0.22283	0.30563	0.25257	0.19409
1443161_at	9	---	---	---	---	---	---	gb:BM240648 /DB_XREF=gi:17875918 /DB_XREF=K0605C04-3 /CLONE=K0605C04 /FEA=EST /CNT=3 /TID=Mm.216164.1 /TIER=ConsEnd /STK=3 /UG=Mm.216164 /UG_TITLE=ESTs	0.56472	0.55783	0.6366	0.94082	0.86774	0.054876	0.039369	0.10518	0.3249	0.14502	0.087103
1445539_at	9	Pde7b	Phosphodiesterase 7B	0007165 // signal transduction // inferred from electronic annotation	---	0003824 // catalytic activity // inferred from electronic annotation /// 0004114 // 3',5'-cyclic-nucleotide phosphodiesterase activity // inferred from electronic annotation /// 0004115 // 3',5'-cyclic-AMP phosphodiesterase activity // inferred from direct assay /// 0016787 // hydrolase activity // inferred from electronic annotation	G_Protein_Signaling // GenMAPP	gb:BE687857 /DB_XREF=gi:10075481 /DB_XREF=uw52c02.x1 /CLONE=IMAGE:3465602 /FEA=EST /CNT=3 /TID=Mm.35223.1 /TIER=ConsEnd /STK=2 /UG=Mm.35223 /UG_TITLE=ESTs	0.36931	0.55278	1.0016	1.3199	1.3534	0.069852	0.078935	-0.10669	0.25127	0.14921	-0.20979
1449885_at	9	Tmem47	transmembrane protein 47	---	0005886 // plasma membrane // inferred from electronic annotation /// 0016020 // membrane // inferred from electronic annotation /// 0016021 // integral to membrane // inferred from electronic annotation /// 0030054 // cell junction // inferred from electronic annotation	---	---	gb:NM_138751.1 /DB_XREF=gi:20270284 /GEN=Tm4sf10 /FEA=FLmRNA /CNT=77 /TID=Mm.154610.1 /TIER=FL /STK=4 /UG=Mm.154610 /LL=192216 /DEF=Mus musculus transmembrane 4 superfamily member 10 (Tm4sf10), mRNA. /PROD=transmembrane 4 superfamily member 10 /FL=gb:BC019751.1 gb:NM_138751.1	0.58595	0.50411	0.63154	1.1558	1.1315	-0.3217	-0.21816	-0.19755	0.41327	0.19259	0.030548
1450843_a_at	9	Serpinh1	serine (or cysteine) peptidase inhibitor, clade H, member 1	0006950 // response to stress // inferred from electronic annotation /// 0030199 // collagen fibril organization // inferred from mutant phenotype /// 0032964 // collagen biosynthetic process // inferred from mutant phenotype /// 0051604 // protein maturation // inferred from mutant phenotype	0005737 // cytoplasm // inferred from direct assay /// 0005783 // endoplasmic reticulum // inferred from electronic annotation /// 0005788 // endoplasmic reticulum lumen // inferred from electronic annotation /// 0005793 // ER-Golgi intermediate compartment // inferred from electronic annotation	0004867 // serine-type endopeptidase inhibitor activity // inferred from electronic annotation /// 0005515 // protein binding // inferred from physical interaction /// 0051082 // unfolded protein binding // inferred from direct assay	---	gb:BI220012 /DB_XREF=gi:14673456 /DB_XREF=602936485F1 /CLONE=IMAGE:5099636 /FEA=FLmRNA /CNT=283 /TID=Mm.22708.1 /TIER=Stack /STK=119 /UG=Mm.22708 /LL=12406 /UG_GENE=Serpinh1 /UG_TITLE=serine (or cysteine) proteinase inhibitor, clade H (heat shock protein 47), member 1 /FL=gb:NM_009825.1	0.38898	0.62241	0.56529	1.0877	1.1593	-0.35618	-0.25193	-0.024549	0.44332	0.43938	0.19012
1456739_x_at	9	Armcx2	armadillo repeat containing, X-linked 2	---	0016020 // membrane // inferred from electronic annotation /// 0016021 // integral to membrane // inferred from electronic annotation	0005488 // binding // inferred from electronic annotation	---	gb:BB392869 /DB_XREF=gi:9115836 /DB_XREF=BB392869 /CLONE=C230080O14 /FEA=EST /CNT=8 /TID=Mm.27714.7 /TIER=Stack /STK=8 /UG=Mm.27714 /LL=67416 /UG_GENE=3230401N03Rik /UG_TITLE=RIKEN cDNA 3230401N03 gene	0.57102	0.38925	0.54639	0.84541	0.93442	-0.12673	-0.093599	-0.13443	0.19047	0.15436	-0.061755
1457445_at	9	Trps1	trichorhinophalangeal syndrome I (human)	0006350 // transcription // inferred from electronic annotation /// 0006355 // regulation of transcription, DNA-dependent // inferred from electronic annotation /// 0045449 // regulation of transcription // inferred from electronic annotation /// 0045892 // negative regulation of transcription, DNA-dependent // inferred from physical interaction	0005622 // intracellular // inferred from electronic annotation /// 0005634 // nucleus // inferred by curator /// 0005634 // nucleus // inferred from electronic annotation	0003677 // DNA binding // inferred from electronic annotation /// 0003700 // transcription factor activity // inferred from electronic annotation /// 0005515 // protein binding // inferred from physical interaction /// 0008270 // zinc ion binding // inferred from electronic annotation /// 0016564 // transcription repressor activity // inferred from physical interaction /// 0043565 // sequence-spe…	---	gb:BB136803 /DB_XREF=gi:15408479 /DB_XREF=BB136803 /CLONE=9830138H06 /FEA=EST /CNT=6 /TID=Mm.207292.1 /TIER=ConsEnd /STK=4 /UG=Mm.207292 /UG_TITLE=ESTs	0.51404	0.57801	0.63191	1.0878	0.97393	0.030052	0.002619	0.092218	0.33577	0.25123	0.095758
1417701_at	10	Ppp1r14c	protein phosphatase 1, regulatory (inhibitor) subunit 14c	0007165 // signal transduction // traceable author statement /// 0042325 // regulation of phosphorylation // inferred from electronic annotation	0005624 // membrane fraction // not recorded /// 0005737 // cytoplasm // inferred from electronic annotation /// 0016020 // membrane // inferred from electronic annotation /// 0019898 // extrinsic to membrane // inferred from electronic annotation	0004864 // phosphoprotein phosphatase inhibitor activity // inferred from electronic annotation /// 0004865 // protein serine/threonine phosphatase inhibitor activity // inferred from direct assay /// 0005515 // protein binding // inferred from electronic annotation	---	gb:NM_133485.1 /DB_XREF=gi:19311013 /GEN=Ppp1r14c /FEA=FLmRNA /CNT=66 /TID=Mm.23009.1 /TIER=FL+Stack /STK=38 /UG=Mm.23009 /LL=76142 /DEF=Mus musculus protein phosphatase 1, regulatory (inhibitor) subunit 14c (Ppp1r14c), mRNA. /PROD=PKC-potentiated PP1 inhibitory protein /FL=gb:AF407167.1 gb:NM_133485.1	0.33433	-0.416	-0.39259	-0.65276	-0.41564	-0.92409	-0.83949	-0.5074	0.55535	0.037986	0.35368
1417959_at	10	Pdlim7	PDZ and LIM domain 7	0001503 // ossification // inferred from electronic annotation /// 0007275 // multicellular organismal development // inferred from electronic annotation /// 0030036 // actin cytoskeleton organization // inferred from physical interaction /// 0030154 // cell differentiation // inferred from electronic annotation /// 0045669 // positive regulation of osteoblast differentiation // inferred from ele…	0001725 // stress fiber // inferred from direct assay /// 0001726 // ruffle // inferred from direct assay /// 0005737 // cytoplasm // inferred from direct assay /// 0005737 // cytoplasm // inferred from electronic annotation /// 0005856 // cytoskeleton // inferred from electronic annotation	0005515 // protein binding // inferred from physical interaction /// 0005515 // protein binding // inferred from electronic annotation /// 0008270 // zinc ion binding // inferred from electronic annotation /// 0046872 // metal ion binding // inferred from electronic annotation	---	gb:NM_026131.1 /DB_XREF=gi:13385639 /GEN=1110003B01Rik /FEA=FLmRNA /CNT=48 /TID=Mm.3395.1 /TIER=FL+Stack /STK=32 /UG=Mm.3395 /LL=67399 /DEF=Mus musculus RIKEN cDNA 1110003B01 gene (1110003B01Rik), mRNA. /PROD=RIKEN cDNA 1110003B01 /FL=gb:NM_026131.1	0.50603	-0.3241	-0.18804	-0.34984	-0.35675	-0.78735	-0.58375	-0.55612	0.56797	0.29645	0.32571
1427026_at	10	Myh4	myosin, heavy polypeptide 4, skeletal muscle	0006941 // striated muscle contraction // inferred from electronic annotation /// 0014823 // response to activity // inferred from direct assay	0005737 // cytoplasm // inferred from electronic annotation /// 0005863 // striated muscle thick filament // inferred from electronic annotation /// 0016459 // myosin complex // inferred from electronic annotation /// 0030016 // myofibril // inferred from electronic annotation /// 0032982 // myosin filament // inferred from electronic annotation	0000166 // nucleotide binding // inferred from electronic annotation /// 0003774 // motor activity // inferred from electronic annotation /// 0003779 // actin binding // inferred from electronic annotation /// 0005515 // protein binding // inferred from electronic annotation /// 0005516 // calmodulin binding // inferred from electronic annotation /// 0005524 // ATP binding // inferred from electr…	Striated_muscle_contraction // GenMAPP	gb:AJ278733.1 /DB_XREF=gi:9581820 /GEN=MYHC-IIB /FEA=mRNA /CNT=62 /TID=Mm.35531.1 /TIER=Stack /STK=24 /UG=Mm.35531 /LL=17884 /DEF=Mus musculus partial mRNA for myosin heavy chain IIB (MYHC-IIB gene). /PROD=myosin heavy chain IIB	1.226	0.18721	-0.68963	-0.74917	-0.65121	-1.1058	-0.92566	-0.59398	0.52223	0.43325	0.54624
1428444_at	10	Asb2	ankyrin repeat and SOCS box-containing 2	0007242 // intracellular signaling cascade // inferred from electronic annotation /// 0019941 // modification-dependent protein catabolic process // inferred from electronic annotation	---	---	---	gb:AK003566.1 /DB_XREF=gi:12834309 /GEN=Asb2 /FEA=mRNA /CNT=56 /TID=Mm.27159.1 /TIER=Stack /STK=42 /UG=Mm.27159 /LL=65256 /UG_TITLE=ankyrin repeat and SOCS box-containing protein 2 /DEF=Mus musculus 18 days embryo whole body cDNA, RIKEN full-length enriched library, clone:1110008E15:ankyrin repeat and SOCS box-containing protein 2, full insert sequence.	0.43717	-0.44891	-0.35223	-0.59907	-0.49461	-0.79082	-0.72691	-0.58694	0.346	0.62398	0.41061
1434766_at	10	Prkaa2	protein kinase, AMP-activated, alpha 2 catalytic subunit	0006468 // protein amino acid phosphorylation // inferred from electronic annotation /// 0006633 // fatty acid biosynthetic process // inferred from electronic annotation /// 0006694 // steroid biosynthetic process // inferred from electronic annotation /// 0006695 // cholesterol biosynthetic process // inferred from electronic annotation /// 0006950 // response to stress // traceable author stat…	0005634 // nucleus // inferred from direct assay /// 0031588 // AMP-activated protein kinase complex // inferred from electronic annotation	0000166 // nucleotide binding // inferred from electronic annotation /// 0000287 // magnesium ion binding // inferred from electronic annotation /// 0004672 // protein kinase activity // inferred from electronic annotation /// 0004674 // protein serine/threonine kinase activity // inferred from electronic annotation /// 0004679 // AMP-activated protein kinase activity // traceable author statemen…	---	gb:BQ175911 /DB_XREF=gi:20351403 /DB_XREF=UI-M-DJ2-bwf-f-10-0-UI.s1 /CLONE=UI-M-DJ2-bwf-f-10-0-UI /FEA=EST /CNT=49 /TID=Mm.10344.1 /TIER=Stack /STK=25 /UG=Mm.10344 /UG_TITLE=ESTs	0.55813	-0.49251	-0.30285	-0.67781	-0.4861	-0.80352	-0.87559	-0.6244	0.56893	0.30605	0.24748
1434799_x_at	10	Aldoa	aldolase A, fructose-bisphosphate	0001666 // response to hypoxia // inferred from electronic annotation /// 0006096 // glycolysis // inferred from electronic annotation /// 0008152 // metabolic process // inferred from electronic annotation /// 0009408 // response to heat // inferred from electronic annotation /// 0032496 // response to lipopolysaccharide // inferred from electronic annotation /// 0035094 // response to nicotine …	0005737 // cytoplasm // inferred from electronic annotation /// 0005739 // mitochondrion // inferred from electronic annotation /// 0019861 // flagellum // inferred from direct assay	0003824 // catalytic activity // inferred from electronic annotation /// 0004332 // fructose-bisphosphate aldolase activity // inferred from direct assay /// 0004332 // fructose-bisphosphate aldolase activity // inferred from electronic annotation /// 0016829 // lyase activity // inferred from electronic annotation	Glycolysis_and_Gluconeogenesis // GenMAPP	gb:BG793658 /DB_XREF=gi:14129228 /DB_XREF=UTSW_SM14F1 /CLONE=UTSW_SM14F1 /FEA=EST /CNT=28 /TID=Mm.16763.4 /TIER=Stack /STK=25 /UG=Mm.16763 /LL=11674 /UG_GENE=Aldo1 /UG_TITLE=aldolase 1, A isoform	0.53611	-0.22829	-0.3513	-0.40871	-0.51316	-0.8621	-0.869	-0.51037	0.55653	0.15664	0.28131
1434909_at	10	Rragd	Ras-related GTP binding D	---	0005634 // nucleus // not recorded /// 0005634 // nucleus // inferred from electronic annotation /// 0005634 // nucleus // inferred from sequence or structural similarity /// 0005737 // cytoplasm // not recorded /// 0005737 // cytoplasm // inferred from electronic annotation /// 0005737 // cytoplasm // inferred from sequence or structural similarity	0000166 // nucleotide binding // inferred from electronic annotation /// 0005515 // protein binding // not recorded /// 0005515 // protein binding // inferred from electronic annotation /// 0005525 // GTP binding // inferred from electronic annotation /// 0046982 // protein heterodimerization activity // inferred from electronic annotation	---	gb:BF462770 /DB_XREF=gi:11531953 /DB_XREF=UI-M-CG0p-bnh-d-07-0-UI.s1 /CLONE=UI-M-CG0p-bnh-d-07-0-UI /FEA=EST /CNT=50 /TID=Mm.34108.1 /TIER=Stack /STK=23 /UG=Mm.34108 /LL=100146 /UG_GENE=AI467523 /UG_TITLE=expressed sequence AI467523	0.42067	-0.46242	-0.20557	-0.54261	-0.3154	-0.57542	-0.36945	-0.50247	0.55734	0.17432	0.23817
1435567_at	10	Phka1	phosphorylase kinase alpha 1	0005975 // carbohydrate metabolic process // inferred from electronic annotation /// 0005977 // glycogen metabolic process // inferred from electronic annotation /// 0006364 // rRNA processing // inferred from electronic annotation /// 0006396 // RNA processing // inferred from electronic annotation /// 0006397 // mRNA processing // inferred from electronic annotation /// 0008380 // RNA splicing …	0005634 // nucleus // inferred from direct assay /// 0005634 // nucleus // inferred from electronic annotation /// 0005730 // nucleolus // inferred from direct assay /// 0005737 // cytoplasm // inferred from direct assay /// 0005737 // cytoplasm // inferred from electronic annotation /// 0005886 // plasma membrane // inferred from electronic annotation /// 0005964 // phosphorylase kinase complex …	0003824 // catalytic activity // inferred from electronic annotation /// 0004689 // phosphorylase kinase activity // inferred from electronic annotation /// 0005515 // protein binding // inferred from electronic annotation /// 0005515 // protein binding // inferred from physical interaction /// 0005516 // calmodulin binding // inferred from electronic annotation /// 0008599 // protein phosphatase…	Glycogen_Metabolism // GenMAPP	gb:AI504378 /DB_XREF=gi:4402229 /DB_XREF=vl09b03.x1 /CLONE=IMAGE:963629 /FEA=EST /CNT=19 /TID=Mm.42254.2 /TIER=Stack /STK=15 /UG=Mm.42254 /LL=18679 /UG_GENE=Phka1 /UG_TITLE=phosphorylase kinase alpha 1	0.69881	-0.16743	-0.28327	-0.31631	-0.33492	-0.63685	-0.40128	-0.55706	0.60976	0.38917	0.50125
1448154_at	10	Ndrg2	N-myc downstream regulated gene 2	0007165 // signal transduction // inferred from electronic annotation /// 0007275 // multicellular organismal development // inferred from electronic annotation /// 0007399 // nervous system development // inferred from electronic annotation /// 0030154 // cell differentiation // inferred from electronic annotation	0005634 // nucleus // inferred from electronic annotation /// 0005737 // cytoplasm // inferred from electronic annotation /// 0005794 // Golgi apparatus // inferred from electronic annotation /// 0005813 // centrosome // inferred from electronic annotation	---	---	gb:NM_013864.1 /DB_XREF=gi:7305304 /GEN=Ndr2 /FEA=FLmRNA /CNT=273 /TID=Mm.26722.1 /TIER=FL+Stack /STK=165 /UG=Mm.26722 /LL=29811 /DEF=Mus musculus N-myc downstream regulated 2 (Ndr2), mRNA. /PROD=N-myc downstream regulated 2 /FL=gb:BC012963.1 gb:AB033921.1 gb:NM_013864.1	0.3387	-0.46576	-0.24827	-0.60887	-0.33133	-0.88925	-0.67686	-0.57252	0.74511	0.34986	0.24829
1449383_at	10	Adssl1	adenylosuccinate synthetase like 1	0006163 // purine nucleotide metabolic process // inferred from direct assay /// 0006164 // purine nucleotide biosynthetic process // inferred from electronic annotation	0005737 // cytoplasm // inferred from direct assay /// 0005737 // cytoplasm // inferred from electronic annotation /// 0016020 // membrane // inferred from electronic annotation /// 0019898 // extrinsic to membrane // inferred from electronic annotation	0000166 // nucleotide binding // inferred from electronic annotation /// 0000287 // magnesium ion binding // inferred from electronic annotation /// 0004019 // adenylosuccinate synthase activity // inferred from direct assay /// 0004019 // adenylosuccinate synthase activity // inferred from electronic annotation /// 0005515 // protein binding // inferred from physical interaction /// 0005525 // G…	---	gb:NM_007421.1 /DB_XREF=gi:6671518 /GEN=Adss1 /FEA=FLmRNA /CNT=34 /TID=Mm.3440.1 /TIER=FL+Stack /STK=12 /UG=Mm.3440 /LL=11565 /DEF=Mus musculus adenylosuccinate synthetase 1, muscle (Adss1), mRNA. /PROD=adenylosuccinate synthetase 1, muscle /FL=gb:M74495.1 gb:NM_007421.1	0.15168	-0.54181	-0.26492	-0.47506	-0.49313	-0.71038	-0.67094	-0.33846	0.47052	0.025801	0.061013
1455794_at	10	Smtnl2	smoothelin-like 2	---	---	---	---	gb:BB458758 /DB_XREF=gi:16426312 /DB_XREF=BB458758 /CLONE=D130058I21 /FEA=EST /CNT=92 /TID=Mm.46732.1 /TIER=Stack /STK=87 /UG=Mm.46732 /UG_TITLE=ESTs	0.47755	-0.38652	-0.35025	-0.69729	-0.52243	-0.88919	-0.91048	-0.70125	0.47548	0.41118	0.34708
1417538_at	11	LOC100046775 /// Slc35a1	similar to CMP-sialic acid transporter /// solute carrier family 35 (CMP-sialic acid transporter), member 1	0006810 // transport // inferred from electronic annotation /// 0008643 // carbohydrate transport // inferred from electronic annotation /// 0015780 // nucleotide-sugar transport // inferred from electronic annotation	0000139 // Golgi membrane // inferred from electronic annotation /// 0005794 // Golgi apparatus // inferred from electronic annotation /// 0016020 // membrane // inferred from electronic annotation /// 0016021 // integral to membrane // inferred from electronic annotation	0005338 // nucleotide-sugar transmembrane transporter activity // inferred from electronic annotation /// 0005351 // sugar:hydrogen symporter activity // inferred from electronic annotation	---	gb:BC012252.1 /DB_XREF=gi:15126642 /FEA=FLmRNA /CNT=92 /TID=Mm.22684.1 /TIER=FL+Stack /STK=42 /UG=Mm.22684 /LL=24060 /UG_GENE=Slc35a1 /DEF=Mus musculus, Similar to solute carrier family 35 (CMP-sialic acid transporter), member 1, clone MGC:18789 IMAGE:4190458, mRNA, complete cds. /PROD=Similar to solute carrier family 35 (CMP-sialicacid transporter), member 1 /FL=gb:NM_011895.1 gb:BC012252.1	0.27609	0.021773	0.78227	0.95672	0.7599	0.23421	0.26508	0.14809	0.25834	0.11568	-0.14121
1422758_at	11	Chst2	carbohydrate sulfotransferase 2	0005975 // carbohydrate metabolic process // inferred from electronic annotation /// 0006044 // N-acetylglucosamine metabolic process // traceable author statement /// 0006044 // N-acetylglucosamine metabolic process // inferred from electronic annotation /// 0006790 // sulfur metabolic process // inferred from electronic annotation /// 0006954 // inflammatory response // inferred from electronic…	0000139 // Golgi membrane // inferred from electronic annotation /// 0005794 // Golgi apparatus // inferred from electronic annotation /// 0005802 // trans-Golgi network // inferred from electronic annotation /// 0016020 // membrane // inferred from electronic annotation /// 0016021 // integral to membrane // inferred from electronic annotation	0001517 // N-acetylglucosamine 6-O-sulfotransferase activity // inferred from electronic annotation /// 0008146 // sulfotransferase activity // inferred from direct assay /// 0008146 // sulfotransferase activity // inferred from electronic annotation /// 0016740 // transferase activity // inferred from electronic annotation	---	gb:NM_018763.1 /DB_XREF=gi:9055185 /GEN=Chst2 /FEA=FLmRNA /CNT=39 /TID=Mm.12968.1 /TIER=FL+Stack /STK=14 /UG=Mm.12968 /LL=54371 /DEF=Mus musculus carbohydrate sulfotransferase 2 (Chst2), mRNA. /PROD=carbohydrate sulfotransferase 2 /FL=gb:NM_018763.1 gb:AB011451.1	0.2719	-0.0045541	0.72415	1.0242	0.68738	0.18189	0.32955	0.0013163	0.10717	0.21362	-0.15519
1430030_at	11	5330426P16Rik	RIKEN cDNA 5330426P16 gene	---	---	---	---	gb:AK019912.1 /DB_XREF=gi:12860308 /FEA=mRNA /CNT=19 /TID=Mm.139089.1 /TIER=ConsEnd /STK=4 /UG=Mm.139089 /LL=68190 /UG_GENE=5330426P16Rik /UG_TITLE=RIKEN cDNA 5330426P16 gene /DEF=Mus musculus adult male pituitary gland cDNA, RIKEN full-length enriched library, clone:5330426P16:unclassifiable transcript, full insert sequence.	0.2312	0.27095	0.53533	1.073	0.88264	-0.14254	0.083832	-0.014644	0.20408	0.083119	-0.081317
1439794_at	11	Ntn4	Netrin 4	0016322 // neuron remodeling // inferred from direct assay /// 0060668 // regulation of branching involved in salivary gland morphogenesis by extracellular matrix-epithelial cell signaling // inferred from direct assay	0005576 // extracellular region // inferred from electronic annotation /// 0005578 // proteinaceous extracellular matrix // inferred from electronic annotation /// 0005604 // basement membrane // inferred from direct assay /// 0005604 // basement membrane // inferred from sequence or structural similarity /// 0005604 // basement membrane // inferred from electronic annotation	0005515 // protein binding // inferred from electronic annotation /// 0043237 // laminin-1 binding // inferred from direct assay	---	gb:BQ086474 /DB_XREF=gi:20045678 /DB_XREF=ih89c07.x1 /CLONE=IMAGE:5939317 /FEA=EST /CNT=11 /TID=Mm.59574.1 /TIER=ConsEnd /STK=6 /UG=Mm.59574 /UG_TITLE=ESTs	0.2944	0.30961	0.6371	1.0145	0.79038	0.33885	0.28154	0.10054	0.43734	0.24964	-0.12512
1440153_at	11	---	---	---	---	---	---	gb:AI854555 /DB_XREF=gi:5498461 /DB_XREF=UI-M-BH0-ajj-g-02-0-UI.s1 /CLONE=UI-M-BH0-ajj-g-02-0-UI /FEA=EST /CNT=6 /TID=Mm.39949.1 /TIER=ConsEnd /STK=6 /UG=Mm.39949 /UG_TITLE=ESTs	0.42065	0.069806	0.54682	0.78809	0.5442	0.16128	0.09093	-0.015109	0.19197	0.17204	0.12845
1443882_at	11	---	---	---	---	---	---	gb:BI150812 /DB_XREF=gi:14610813 /DB_XREF=602914710F1 /CLONE=IMAGE:5065274 /FEA=EST /CNT=13 /TID=Mm.215863.1 /TIER=ConsEnd /STK=2 /UG=Mm.215863 /UG_TITLE=ESTs, Weakly similar to TYROSINE-PROTEIN KINASE JAK3 (M.musculus)	0.36946	0.076737	0.78251	0.82885	0.95777	-0.10654	0.093358	-0.039918	0.22204	0.25891	-0.19806
1449459_s_at	11	Asb13	ankyrin repeat and SOCS box-containing 13	0007242 // intracellular signaling cascade // inferred from electronic annotation /// 0019941 // modification-dependent protein catabolic process // inferred from electronic annotation	---	0005515 // protein binding // inferred from electronic annotation	---	gb:NM_080857.1 /DB_XREF=gi:18252801 /GEN=Asb13 /FEA=FLmRNA /CNT=29 /TID=Mm.21523.1 /TIER=FL+Stack /STK=10 /UG=Mm.21523 /LL=142688 /DEF=Mus musculus ankyrin repeat domain-containing SOCS box protein 13 (Asb13), mRNA. /PROD=ankyrin repeat domain-containing SOCS boxprotein 13 /FL=gb:NM_080857.1 gb:AF403041.1 gb:BC018240.1	0.42624	-0.24266	0.87266	0.88454	0.96471	0.070744	0.19258	-0.11191	0.36964	0.22273	-0.098762
1454678_s_at	11	A130022J15Rik	RIKEN cDNA A130022J15 gene	---	0005576 // extracellular region // inferred from electronic annotation /// 0005783 // endoplasmic reticulum // inferred from electronic annotation	0016740 // transferase activity // inferred from electronic annotation /// 0016757 // transferase activity, transferring glycosyl groups // inferred from electronic annotation	---	gb:BI149851 /DB_XREF=gi:14609852 /DB_XREF=602849128F1 /CLONE=IMAGE:5012766 /FEA=EST /CNT=89 /TID=Mm.5357.1 /TIER=Stack /STK=74 /UG=Mm.5357 /LL=58893 /UG_GENE=AI447490 /UG_TITLE=EST AI447490	0.3893	0.15809	0.59253	0.87406	0.72152	-0.024544	0.14744	-0.15586	0.36621	0.10698	-0.0041258
1457266_at	11	---	---	---	---	---	---	gb:BE447661 /DB_XREF=gi:9447238 /DB_XREF=ut48f03.x1 /CLONE=IMAGE:3331133 /FEA=EST /CNT=13 /TID=Mm.37829.1 /TIER=ConsEnd /STK=4 /UG=Mm.37829 /LL=105016 /UG_GENE=AW322671 /UG_TITLE=expressed sequence AW322671	0.19554	0.1347	0.75749	0.81557	0.81667	0.26757	0.31878	0.21929	0.31811	0.070739	-0.16639
1457966_at	11	---	---	---	---	---	---	gb:BI499709 /DB_XREF=gi:15339053 /DB_XREF=ie44g11.x1 /FEA=EST /CNT=4 /TID=Mm.202719.1 /TIER=ConsEnd /STK=3 /UG=Mm.202719 /UG_TITLE=ESTs	0.37412	0.20515	0.51203	0.81802	0.9096	0.081355	0.2469	0.039708	0.3688	0.17969	-0.026892
1460116_s_at	11	Spred1	sprouty protein with EVH-1 domain 1, related sequence	0000188 // inactivation of MAPK activity // inferred from mutant phenotype /// 0007275 // multicellular organismal development // inferred from electronic annotation /// 0009966 // regulation of signal transduction // inferred from electronic annotation	0005634 // nucleus // inferred from electronic annotation /// 0005886 // plasma membrane // inferred from electronic annotation /// 0016020 // membrane // inferred from electronic annotation /// 0019898 // extrinsic to membrane // inferred from electronic annotation	0005173 // stem cell factor receptor binding // inferred from physical interaction /// 0005515 // protein binding // inferred from physical interaction	---	gb:AI450584 /DB_XREF=gi:4298024 /DB_XREF=mq86c11.x1 /CLONE=IMAGE:585620 /FEA=EST /CNT=3 /TID=Mm.200247.1 /TIER=ConsEnd /STK=3 /UG=Mm.200247 /LL=99293 /UG_GENE=AW047647 /UG_TITLE=expressed sequence AW047647	0.30689	0.20963	0.66581	0.92901	0.86517	-0.16949	0.066067	-0.21049	0.2222	0.17505	-0.023871
1416313_at	12	Mllt11	myeloid/lymphoid or mixed-lineage leukemia (trithorax homolog, Drosophila); translocated to, 11	---	---	---	---	gb:NM_019914.1 /DB_XREF=gi:9910123 /GEN=Af1q-pending /FEA=FLmRNA /CNT=164 /TID=Mm.25165.1 /TIER=FL+Stack /STK=99 /UG=Mm.25165 /LL=56772 /DEF=Mus musculus ALL1-fused gene from chromosome 1q (Af1q-pending), mRNA. /PROD=ALL1-fused gene from chromosome 1q /FL=gb:AB000733.1 gb:U95498.1 gb:BC022963.1 gb:NM_019914.1	0.44593	-0.20085	-0.021093	-0.15796	0.11825	-0.65935	-0.51394	-0.55001	0.56276	0.44807	0.3047
1422743_at	12	Phka1	phosphorylase kinase alpha 1	0005975 // carbohydrate metabolic process // inferred from electronic annotation /// 0005977 // glycogen metabolic process // inferred from electronic annotation /// 0006364 // rRNA processing // inferred from electronic annotation /// 0006396 // RNA processing // inferred from electronic annotation /// 0006397 // mRNA processing // inferred from electronic annotation /// 0008380 // RNA splicing …	0005634 // nucleus // inferred from direct assay /// 0005634 // nucleus // inferred from electronic annotation /// 0005730 // nucleolus // inferred from direct assay /// 0005737 // cytoplasm // inferred from direct assay /// 0005737 // cytoplasm // inferred from electronic annotation /// 0005886 // plasma membrane // inferred from electronic annotation /// 0005964 // phosphorylase kinase complex …	0003824 // catalytic activity // inferred from electronic annotation /// 0004689 // phosphorylase kinase activity // inferred from electronic annotation /// 0005515 // protein binding // inferred from electronic annotation /// 0005515 // protein binding // inferred from physical interaction /// 0005516 // calmodulin binding // inferred from electronic annotation /// 0008599 // protein phosphatase…	Glycogen_Metabolism // GenMAPP	gb:NM_008832.1 /DB_XREF=gi:6679300 /GEN=Phka1 /FEA=FLmRNA /CNT=42 /TID=Mm.42254.1 /TIER=FL+Stack /STK=15 /UG=Mm.42254 /LL=18679 /DEF=Mus musculus phosphorylase kinase alpha 1 (Phka1), mRNA. /PROD=phosphorylase kinase alpha 1 /FL=gb:NM_008832.1	0.85575	-0.188	-0.32568	-0.34002	-0.27856	-0.89543	-0.77622	-0.70285	0.79969	0.51126	0.58037
1423856_at	12	Popdc3	popeye domain containing 3	---	0016020 // membrane // inferred from direct assay /// 0016020 // membrane // inferred from electronic annotation /// 0016021 // integral to membrane // inferred from electronic annotation	---	---	gb:AF204176.2 /DB_XREF=gi:10835914 /GEN=Pop3 /FEA=FLmRNA /CNT=191 /TID=Mm.5290.1 /TIER=FL /STK=6 /UG=Mm.5290 /LL=78977 /DEF=Mus musculus chromosome 10 popeye protein 3 (Pop3) mRNA, complete cds. /PROD=popeye protein 3 /FL=gb:BC003896.1 gb:AF204176.2	0.40792	-0.3003	-0.17504	-0.2027	-0.13121	-0.75838	-0.71972	-0.58616	0.62797	0.22597	0.26414
1425274_at	12	Asph	aspartate-beta-hydroxylase	0006810 // transport // inferred from electronic annotation /// 0007389 // pattern specification process // inferred from mutant phenotype /// 0008285 // negative regulation of cell proliferation // inferred from genetic interaction /// 0018193 // peptidyl-amino acid modification // inferred from electronic annotation /// 0035108 // limb morphogenesis // inferred from mutant phenotype /// 0042264…	0005622 // intracellular // inferred from electronic annotation /// 0005783 // endoplasmic reticulum // inferred from electronic annotation /// 0016020 // membrane // inferred from electronic annotation /// 0016021 // integral to membrane // inferred from sequence or structural similarity /// 0016021 // integral to membrane // inferred from electronic annotation /// 0030176 // integral to endopla…	0004597 // peptide-aspartate beta-dioxygenase activity // inferred from sequence or structural similarity /// 0004597 // peptide-aspartate beta-dioxygenase activity // inferred from electronic annotation /// 0005215 // transporter activity // inferred from electronic annotation /// 0005488 // binding // inferred from electronic annotation /// 0005506 // iron ion binding // inferred from electroni…	---	gb:AF221854.1 /DB_XREF=gi:12655824 /FEA=FLmRNA /CNT=16 /TID=Mm.3088.2 /TIER=FL /STK=3 /UG=Mm.3088 /LL=65973 /UG_GENE=Asph /DEF=Mus musculus cardiac junctin mRNA, complete cds. /PROD=cardiac junctin /FL=gb:AF289490.1 gb:AF221854.1	0.65553	-0.48644	-0.051835	-0.24517	-0.082478	-0.63417	-0.48901	-0.60138	0.59052	0.27622	0.14042
1427943_at	12	Acyp2	acylphosphatase 2, muscle type	---	0005739 // mitochondrion // inferred from direct assay	0003998 // acylphosphatase activity // inferred from electronic annotation /// 0016787 // hydrolase activity // inferred from electronic annotation	---	gb:BI730288 /DB_XREF=gi:15707301 /DB_XREF=603350266F1 /CLONE=IMAGE:5357536 /FEA=mRNA /CNT=33 /TID=Mm.28407.1 /TIER=Stack /STK=14 /UG=Mm.28407 /LL=75572 /UG_GENE=Acyp2 /UG_TITLE=acylphosphatase 2, muscle type	0.5085	-0.37474	-0.22889	-0.38686	-0.19517	-0.89605	-0.89581	-0.64589	0.5944	0.30173	0.37862
1433691_at	12	Ppp1r3c	protein phosphatase 1, regulatory (inhibitor) subunit 3C	0005975 // carbohydrate metabolic process // inferred from electronic annotation /// 0005977 // glycogen metabolic process // inferred from direct assay /// 0005977 // glycogen metabolic process // inferred from electronic annotation /// 0005978 // glycogen biosynthetic process // inferred from mutant phenotype /// 0005979 // regulation of glycogen biosynthetic process // inferred from electronic…	0005625 // soluble fraction // inferred from electronic annotation /// 0005792 // microsome // inferred from electronic annotation /// 0042587 // glycogen granule // inferred from electronic annotation	0004721 // phosphoprotein phosphatase activity // inferred from electronic annotation /// 0005515 // protein binding // traceable author statement /// 0019899 // enzyme binding // inferred from electronic annotation	Circadian_Exercise // GenMAPP	gb:BQ176864 /DB_XREF=gi:20352356 /DB_XREF=UI-M-DJ2-bvz-n-10-0-UI.s1 /CLONE=UI-M-DJ2-bvz-n-10-0-UI /FEA=EST /CNT=85 /TID=Mm.24724.2 /TIER=Stack /STK=71 /UG=Mm.24724 /LL=53412 /UG_GENE=Ppp1r3c /UG_TITLE=protein phosphatase 1, regulatory (inhibitor) subunit 3C	0.55252	-0.36716	-0.1094	-0.067698	-0.016627	-0.71449	-0.49758	-0.69153	0.41102	0.20501	0.03608
1434897_a_at	12	Slc25a4	solute carrier family 25 (mitochondrial carrier, adenine nucleotide translocator), member 4	0006810 // transport // inferred from electronic annotation /// 0015866 // ADP transport // inferred from electronic annotation /// 0015867 // ATP transport // inferred from electronic annotation /// 0051935 // glutamate uptake during transmission of nerve impulse // inferred from electronic annotation /// 0055085 // transmembrane transport // inferred from electronic annotation	0005739 // mitochondrion // inferred from electronic annotation /// 0005739 // mitochondrion // inferred from direct assay /// 0005741 // mitochondrial outer membrane // inferred from sequence or structural similarity /// 0005741 // mitochondrial outer membrane // inferred from electronic annotation /// 0005743 // mitochondrial inner membrane // inferred from direct assay /// 0005743 // mitochond…	0005215 // transporter activity // inferred from electronic annotation /// 0005471 // ATP:ADP antiporter activity // inferred from electronic annotation /// 0005488 // binding // inferred from electronic annotation /// 0005515 // protein binding // inferred from electronic annotation	Electron_Transport_Chain // GenMAPP /// mRNA_processing_binding_Reactome // GenMAPP	gb:AV327862 /DB_XREF=gi:16395739 /DB_XREF=AV327862 /CLONE=6330437A14 /FEA=EST /CNT=29 /TID=Mm.16228.4 /TIER=Stack /STK=23 /UG=Mm.16228 /LL=11739 /UG_GENE=Slc25a4 /UG_TITLE=solute carrier family 25 (mitochondrial carrier; adenine nucleotide translocator), member 4	0.46196	-0.040044	-0.012629	-0.17908	-0.13919	-0.88221	-0.74482	-0.54139	0.58421	0.2038	0.10585
1435649_at	12	Nexn	nexilin	0030334 // regulation of cell migration // inferred from electronic annotation /// 0030334 // regulation of cell migration // inferred from sequence or structural similarity /// 0051493 // regulation of cytoskeleton organization // inferred from electronic annotation /// 0051493 // regulation of cytoskeleton organization // inferred from sequence or structural similarity	0005737 // cytoplasm // inferred from electronic annotation /// 0005856 // cytoskeleton // inferred from electronic annotation /// 0005912 // adherens junction // inferred from electronic annotation /// 0005924 // cell-substrate adherens junction // not recorded /// 0005924 // cell-substrate adherens junction // inferred from electronic annotation /// 0005924 // cell-substrate adherens junction /…	0003779 // actin binding // inferred from electronic annotation /// 0051015 // actin filament binding // not recorded /// 0051015 // actin filament binding // inferred from electronic annotation /// 0051015 // actin filament binding // inferred from sequence or structural similarity	---	gb:BM225804 /DB_XREF=gi:17787481 /DB_XREF=K0217D09-3 /CLONE=K0217D09 /FEA=EST /CNT=32 /TID=Mm.200188.1 /TIER=Stack /STK=14 /UG=Mm.200188 /LL=68810 /UG_GENE=1110046H09Rik /UG_TITLE=RIKEN cDNA 1110046H09 gene	0.78873	-0.44477	-0.2223	-0.46885	-0.058664	-1.1658	-0.89995	-0.86946	1.0443	0.591	0.55748
1447870_x_at	12	1110002E22Rik	RIKEN cDNA 1110002E22 gene	---	---	---	---	gb:BB099116 /DB_XREF=gi:8744150 /DB_XREF=BB099116 /CLONE=9430067C12 /FEA=EST /CNT=2 /TID=Mm.117738.1 /TIER=ConsEnd /STK=2 /UG=Mm.117738 /UG_TITLE=ESTs	1.0483	-0.50369	-0.12696	-0.66389	-0.0018653	-1.3139	-1.3225	-0.9043	0.53489	0.60312	0.34149
1449178_at	12	Pdlim3	PDZ and LIM domain 3	0007015 // actin filament organization // inferred from direct assay /// 0007507 // heart development // inferred from mutant phenotype /// 0007519 // skeletal muscle tissue development // inferred from mutant phenotype	0005634 // nucleus // inferred from electronic annotation /// 0005737 // cytoplasm // inferred from electronic annotation /// 0015629 // actin cytoskeleton // inferred from physical interaction /// 0030018 // Z disc // traceable author statement /// 0030018 // Z disc // inferred from electronic annotation	0005515 // protein binding // traceable author statement /// 0005515 // protein binding // inferred from electronic annotation /// 0008092 // cytoskeletal protein binding // inferred from physical interaction /// 0008270 // zinc ion binding // inferred from electronic annotation /// 0008307 // structural constituent of muscle // inferred from direct assay /// 0008307 // structural constituent of …	---	gb:NM_016798.1 /DB_XREF=gi:7948996 /GEN=Pdlim3 /FEA=FLmRNA /CNT=139 /TID=Mm.7342.1 /TIER=FL+Stack /STK=19 /UG=Mm.7342 /LL=53318 /DEF=Mus musculus PDZ and LIM domain 3 (Pdlim3), mRNA. /PROD=PDZ and LIM domain 3 /FL=gb:NM_016798.1 gb:AF002283.1	0.45161	-0.19383	-0.17337	-0.49532	-0.26121	-1.1342	-0.90205	-0.80342	0.60004	0.47315	0.27738
1451149_at	12	Pgm2	phosphoglucomutase 2	0005975 // carbohydrate metabolic process // inferred from electronic annotation /// 0006006 // glucose metabolic process // inferred from direct assay /// 0006006 // glucose metabolic process // inferred from electronic annotation	0005737 // cytoplasm // inferred from electronic annotation	0000287 // magnesium ion binding // inferred from electronic annotation /// 0004614 // phosphoglucomutase activity // inferred from direct assay /// 0004614 // phosphoglucomutase activity // inferred from electronic annotation /// 0016853 // isomerase activity // inferred from electronic annotation /// 0016868 // intramolecular transferase activity, phosphotransferases // inferred from electronic…	Glycogen_Metabolism // GenMAPP	gb:BC008527.1 /DB_XREF=gi:14250209 /FEA=FLmRNA /CNT=180 /TID=Mm.22403.1 /TIER=FL+Stack /STK=90 /UG=Mm.22403 /LL=72157 /UG_GENE=2610020G18Rik /DEF=Mus musculus, RIKEN cDNA 2610020G18 gene, clone MGC:6642 IMAGE:3495694, mRNA, complete cds. /PROD=RIKEN cDNA 2610020G18 gene /FL=gb:BC008527.1	0.45472	-0.25583	-0.32342	-0.185	-0.17796	-0.87023	-0.68491	-0.61305	0.39557	0.16612	0.22526
1423380_s_at	13	Nfatc4	nuclear factor of activated T-cells, cytoplasmic, calcineurin-dependent 4	0006350 // transcription // inferred from electronic annotation /// 0006355 // regulation of transcription, DNA-dependent // inferred from direct assay /// 0006355 // regulation of transcription, DNA-dependent // inferred from electronic annotation /// 0007507 // heart development // inferred from genetic interaction /// 0030154 // cell differentiation // inferred from electronic annotation /// 0…	0005634 // nucleus // inferred from electronic annotation /// 0005737 // cytoplasm // inferred from electronic annotation	0003677 // DNA binding // inferred from direct assay /// 0003677 // DNA binding // inferred from electronic annotation /// 0003700 // transcription factor activity // inferred from direct assay /// 0003700 // transcription factor activity // inferred from electronic annotation	---	gb:BF227641 /DB_XREF=gi:11135635 /DB_XREF=uz31g08.x1 /CLONE=IMAGE:3670718 /FEA=FLmRNA /CNT=24 /TID=Mm.27908.1 /TIER=Stack /STK=10 /UG=Mm.27908 /LL=73181 /UG_GENE=Nfatc4 /UG_TITLE=nuclear factor of activated T-cells, cytoplasmic, calcineurin-dependent 4 /FL=gb:NM_023699.1 gb:AF283284.1	0.60274	0.62259	0.51972	0.57573	0.53775	0.17506	0.11818	0.15226	0.24122	0.16316	0.076297
1434148_at	13	Tcf4	transcription factor 4	0000122 // negative regulation of transcription from RNA polymerase II promoter // inferred from direct assay /// 0006350 // transcription // inferred from electronic annotation /// 0006355 // regulation of transcription, DNA-dependent // inferred from direct assay /// 0007275 // multicellular organismal development // inferred from electronic annotation /// 0045449 // regulation of transcription…	0005634 // nucleus // inferred from electronic annotation /// 0005667 // transcription factor complex // inferred from direct assay	0003677 // DNA binding // inferred from direct assay /// 0003677 // DNA binding // not recorded /// 0003677 // DNA binding // inferred from electronic annotation /// 0003714 // transcription corepressor activity // inferred from direct assay /// 0005515 // protein binding // inferred from physical interaction /// 0030528 // transcription regulator activity // inferred from electronic annotation	---	gb:BB474461 /DB_XREF=gi:16439862 /DB_XREF=BB474461 /CLONE=D330006K22 /FEA=EST /CNT=211 /TID=Mm.13020.4 /TIER=Stack /STK=40 /UG=Mm.13020 /LL=22121 /UG_GENE=Rpl13a /UG_TITLE=ribosomal protein L13a	0.28168	0.51571	0.52775	0.76297	0.8214	0.19635	0.085504	0.089784	0.25947	0.23394	0.012288
1434265_s_at	13	Ank2	ankyrin 2, brain	0006915 // apoptosis // inferred from reviewed computational analysis /// 0007165 // signal transduction // inferred from electronic annotation /// 0008104 // protein localization // inferred from mutant phenotype /// 0034394 // protein localization at cell surface // inferred from mutant phenotype /// 0042981 // regulation of apoptosis // inferred from reviewed computational analysis /// 0060048…	0005737 // cytoplasm // inferred from direct assay /// 0005737 // cytoplasm // inferred from electronic annotation /// 0005856 // cytoskeleton // inferred from electronic annotation /// 0005886 // plasma membrane // inferred from electronic annotation /// 0005887 // integral to plasma membrane // inferred from direct assay /// 0016020 // membrane // inferred from electronic annotation /// 0016324…	0005515 // protein binding // inferred from physical interaction /// 0005515 // protein binding // inferred from electronic annotation	---	gb:BQ174638 /DB_XREF=gi:20350129 /DB_XREF=UI-M-DJ2-bwb-c-17-0-UI.s1 /CLONE=UI-M-DJ2-bwb-c-17-0-UI /FEA=EST /CNT=59 /TID=Mm.41182.1 /TIER=Stack /STK=37 /UG=Mm.41182 /LL=99718 /UG_GENE=AI835472 /UG_TITLE=expressed sequence AI835472	0.32336	0.48652	0.73023	0.66317	0.75022	0.10422	0.17767	0.091825	0.42127	0.10287	0.17898
1435060_at	13	Tmod2	tropomodulin 2	0007270 // nerve-nerve synaptic transmission // inferred from mutant phenotype /// 0007611 // learning or memory // inferred from mutant phenotype /// 0045745 // positive regulation of G-protein coupled receptor protein signaling pathway // inferred from mutant phenotype	0005737 // cytoplasm // inferred from electronic annotation /// 0005856 // cytoskeleton // inferred from electronic annotation /// 0030426 // growth cone // inferred from electronic annotation /// 0043005 // neuron projection // inferred from electronic annotation	0003779 // actin binding // inferred from electronic annotation /// 0005523 // tropomyosin binding // not recorded /// 0005523 // tropomyosin binding // inferred from electronic annotation	---	gb:BB667124 /DB_XREF=gi:16398573 /DB_XREF=BB667124 /CLONE=4022442L22 /FEA=EST /CNT=25 /TID=Mm.40489.1 /TIER=Stack /STK=21 /UG=Mm.40489 /UG_TITLE=ESTs	0.18181	0.54021	0.74908	0.55938	0.72814	0.30663	0.28834	-0.061864	0.39724	0.34321	0.065292
1440635_at	13	Palld	palladin, cytoskeletal associated protein	---	0005634 // nucleus // inferred from sequence or structural similarity /// 0005737 // cytoplasm // inferred from electronic annotation /// 0005856 // cytoskeleton // inferred from electronic annotation /// 0005884 // actin filament // inferred from sequence or structural similarity	0003779 // actin binding // inferred from electronic annotation	---	gb:BB534971 /DB_XREF=gi:16446473 /DB_XREF=BB534971 /CLONE=E030040P03 /FEA=EST /CNT=5 /TID=Mm.212738.1 /TIER=ConsEnd /STK=5 /UG=Mm.212738 /UG_TITLE=ESTs, Weakly similar to 2020397A C protein (M.musculus)	0.38267	0.51687	0.5115	0.71229	0.69941	0.13394	0.061628	0.094766	0.29306	0.32255	0.017979
1452384_at	13	Enpp3	ectonucleotide pyrophosphatase/phosphodiesterase 3	0006796 // phosphate metabolic process // inferred from electronic annotation /// 0006955 // immune response // inferred from electronic annotation /// 0008152 // metabolic process // inferred from electronic annotation /// 0009143 // nucleoside triphosphate catabolic process // inferred from electronic annotation	0005576 // extracellular region // inferred from electronic annotation /// 0016020 // membrane // inferred from electronic annotation /// 0016021 // integral to membrane // inferred from electronic annotation /// 0048471 // perinuclear region of cytoplasm // inferred from electronic annotation	0003676 // nucleic acid binding // inferred from electronic annotation /// 0003824 // catalytic activity // inferred from electronic annotation /// 0004528 // phosphodiesterase I activity // inferred from electronic annotation /// 0004551 // nucleotide diphosphatase activity // inferred from electronic annotation /// 0005044 // scavenger receptor activity // inferred from electronic annotation //…	---	gb:AV224446 /DB_XREF=gi:15404869 /DB_XREF=AV224446 /CLONE=3830420L23 /FEA=mRNA /CNT=105 /TID=Mm.53371.1 /TIER=Stack /STK=8 /UG=Mm.53371 /LL=103316 /UG_GENE=AI876438 /UG_TITLE=expressed sequence AI876438	0.2103	0.40064	0.58706	0.58789	0.64623	0.34132	0.32193	0.22268	0.061362	0.11163	0.2527
1452770_at	13	Vkorc1	vitamin K epoxide reductase complex, subunit 1	0010243 // response to organic nitrogen // inferred from electronic annotation /// 0014070 // response to organic cyclic substance // inferred from electronic annotation /// 0030193 // regulation of blood coagulation // inferred from electronic annotation /// 0042371 // vitamin K biosynthetic process // not recorded /// 0042373 // vitamin K metabolic process // inferred from direct assay /// 0046…	0005783 // endoplasmic reticulum // not recorded /// 0005783 // endoplasmic reticulum // inferred from electronic annotation /// 0005792 // microsome // inferred from electronic annotation /// 0016020 // membrane // inferred from electronic annotation /// 0016021 // integral to membrane // inferred from electronic annotation	0016491 // oxidoreductase activity // inferred from electronic annotation /// 0047057 // vitamin-K-epoxide reductase (warfarin-sensitive) activity // inferred from direct assay /// 0047057 // vitamin-K-epoxide reductase (warfarin-sensitive) activity // not recorded /// 0047057 // vitamin-K-epoxide reductase (warfarin-sensitive) activity // inferred from electronic annotation /// 0047058 // vitami…	---	gb:AK003237.1 /DB_XREF=gi:12833779 /GEN=D7Wsu86e /FEA=mRNA /CNT=95 /TID=Mm.29703.1 /TIER=Stack /STK=45 /UG=Mm.29703 /LL=27973 /UG_TITLE=DNA segment, Chr 7, Wayne State University 86, expressed /DEF=Mus musculus 18 days embryo whole body cDNA, RIKEN full-length enriched library, clone:1110001K05:DNA segment, Chr 7, Wayne State University 86, expressed, full insert sequence.	0.31875	0.43054	0.51689	0.72617	0.74359	0.1397	0.14308	0.062133	0.28601	0.18497	0.04787
1455697_at	13	---	---	---	---	---	---	gb:BQ175938 /DB_XREF=gi:20351430 /DB_XREF=UI-M-DJ2-bwf-j-24-0-UI.s1 /CLONE=UI-M-DJ2-bwf-j-24-0-UI /FEA=EST /CNT=14 /TID=Mm.23064.1 /TIER=Stack /STK=9 /UG=Mm.23064 /UG_TITLE=ESTs	-0.17078	0.48213	0.5694	0.53137	0.80197	0.2253	0.2245	0.086597	-0.070923	0.10167	0.019955
1460695_a_at	13	2010111I01Rik	RIKEN cDNA 2010111I01 gene	0006508 // proteolysis // inferred from sequence or structural similarity /// 0006508 // proteolysis // inferred from electronic annotation /// 0019370 // leukotriene biosynthetic process // inferred from electronic annotation	0005737 // cytoplasm // inferred from electronic annotation	0004177 // aminopeptidase activity // inferred from sequence or structural similarity /// 0004177 // aminopeptidase activity // inferred from electronic annotation /// 0004428 // inositol or phosphatidylinositol kinase activity // inferred from electronic annotation /// 0005488 // binding // inferred from electronic annotation /// 0008233 // peptidase activity // inferred from electronic annotati…	---	gb:BC027288.1 /DB_XREF=gi:20071037 /FEA=mRNA /CNT=28 /TID=Mm.30248.1 /TIER=ConsEnd /STK=0 /UG=Mm.30248 /DEF=Mus musculus, clone IMAGE:3589087, mRNA, partial cds. /PROD=Unknown (protein for IMAGE:3589087)	0.23938	0.78298	0.51684	0.53682	0.60859	0.13099	0.17447	0.15362	0.29188	0.20339	0.18596
1418670_s_at	14	Hspg2	perlecan (heparan sulfate proteoglycan 2)	0001958 // endochondral ossification // inferred from mutant phenotype /// 0002062 // chondrocyte differentiation // inferred from mutant phenotype /// 0007155 // cell adhesion // inferred from electronic annotation /// 0007420 // brain development // inferred from mutant phenotype /// 0008104 // protein localization // inferred from mutant phenotype /// 0030198 // extracellular matrix organizati…	0005576 // extracellular region // inferred from electronic annotation /// 0005578 // proteinaceous extracellular matrix // inferred from direct assay /// 0005578 // proteinaceous extracellular matrix // inferred from electronic annotation /// 0005604 // basement membrane // inferred from direct assay /// 0005604 // basement membrane // inferred from electronic annotation /// 0005605 // basal lam…	0005515 // protein binding // inferred from physical interaction /// 0005515 // protein binding // inferred from electronic annotation	---	gb:NM_008305.1 /DB_XREF=gi:6680310 /GEN=Hspg2 /FEA=FLmRNA /CNT=75 /TID=Mm.7257.1 /TIER=FL+Stack /STK=20 /UG=Mm.7257 /LL=15530 /DEF=Mus musculus perlecan (heparan sulfate proteoglycan 2) (Hspg2), mRNA. /PROD=perlecan (heparan sulfate proteoglycan 2) /FL=gb:NM_008305.1 gb:M77174.1	0.61665	0.62037	0.65387	0.98934	1.0678	0.15691	0.3042	0.13799	0.56588	0.35792	0.25355
1421045_at	14	Mrc2	mannose receptor, C type 2	0006897 // endocytosis // inferred from electronic annotation	0009986 // cell surface // not recorded /// 0016020 // membrane // inferred from electronic annotation /// 0016021 // integral to membrane // inferred from electronic annotation	0004872 // receptor activity // inferred from electronic annotation /// 0005488 // binding // inferred from electronic annotation /// 0005509 // calcium ion binding // inferred from electronic annotation /// 0005518 // collagen binding // not recorded /// 0005529 // sugar binding // not recorded /// 0005529 // sugar binding // inferred from electronic annotation	---	gb:BB528408 /DB_XREF=gi:16444647 /DB_XREF=BB528408 /CLONE=D930046I06 /FEA=FLmRNA /CNT=54 /TID=Mm.9020.1 /TIER=Stack /STK=13 /UG=Mm.9020 /LL=17534 /UG_GENE=Mrc2 /UG_TITLE=mannose receptor, C type 2 /FL=gb:NM_008626.1 gb:U56734.1	0.59295	0.49769	0.6458	1.1161	0.93574	0.16081	0.19403	-0.075496	0.69571	0.35666	0.38179
1424051_at	14	Col4a2	collagen, type IV, alpha 2	0016525 // negative regulation of angiogenesis // inferred from electronic annotation /// 0016525 // negative regulation of angiogenesis // inferred from sequence or structural similarity	0005576 // extracellular region // inferred from electronic annotation /// 0005578 // proteinaceous extracellular matrix // inferred from electronic annotation /// 0005581 // collagen // inferred from electronic annotation /// 0005587 // collagen type IV // inferred from direct assay /// 0005604 // basement membrane // inferred from direct assay /// 0005604 // basement membrane // inferred from e…	0005201 // extracellular matrix structural constituent // inferred from electronic annotation /// 0005488 // binding // inferred from electronic annotation	---	gb:BC013560.1 /DB_XREF=gi:15488859 /FEA=FLmRNA /CNT=215 /TID=Mm.181021.1 /TIER=FL+Stack /STK=58 /UG=Mm.181021 /LL=12827 /UG_GENE=Col4a2 /DEF=Mus musculus, clone MGC:7371 IMAGE:3487528, mRNA, complete cds. /PROD=Unknown (protein for MGC:7371) /FL=gb:BC013560.1 gb:J04695.1	0.55061	0.52438	0.75544	1.3612	1.1075	-0.051557	0.20266	-0.0076373	0.6992	0.33978	0.29122
1429219_at	14	1200009F10Rik	RIKEN cDNA 1200009F10 gene	0006917 // induction of apoptosis // inferred from sequence or structural similarity /// 0010165 // response to X-ray // inferred from sequence or structural similarity	0005783 // endoplasmic reticulum // inferred from sequence or structural similarity /// 0005783 // endoplasmic reticulum // inferred from electronic annotation /// 0016020 // membrane // inferred from electronic annotation /// 0016021 // integral to membrane // inferred from electronic annotation	0005515 // protein binding // inferred from sequence or structural similarity	---	gb:AK004670.1 /DB_XREF=gi:12836008 /FEA=mRNA /CNT=25 /TID=Mm.37415.1 /TIER=Stack /STK=9 /UG=Mm.37415 /LL=67454 /UG_GENE=1200009F10Rik /UG_TITLE=RIKEN cDNA 1200009F10 gene /DEF=Mus musculus adult male lung cDNA, RIKEN full-length enriched library, clone:1200009F10:hypothetical protein, full insert sequence.	0.7135	0.78314	0.6301	1.2281	0.98773	0.16945	0.29024	-0.034124	0.502	0.30158	0.21937
1431146_a_at	14	Cpne8	copine VIII	---	---	---	---	gb:AK004559.1 /DB_XREF=gi:12835810 /FEA=mRNA /CNT=10 /TID=Mm.80748.2 /TIER=ConsEnd /STK=0 /UG=Mm.80748 /LL=66871 /UG_GENE=1200003E11Rik /UG_TITLE=RIKEN cDNA 1200003E11 gene /DEF=Mus musculus adult male lung cDNA, RIKEN full-length enriched library, clone:1200003E11:homolog to COPINE-LIKE PROTEIN KIAA1599, full insert sequence.	0.6846	0.40544	0.50382	0.96895	0.65637	0.075848	0.26986	-0.0096222	0.66892	0.41547	0.40523
1433525_at	14	Ednra	endothelin receptor type A	0001569 // patterning of blood vessels // inferred from genetic interaction /// 0001666 // response to hypoxia // inferred from mutant phenotype /// 0001701 // in utero embryonic development // inferred from mutant phenotype /// 0001934 // positive regulation of protein amino acid phosphorylation // inferred from electronic annotation /// 0007165 // signal transduction // inferred from electronic…	0005886 // plasma membrane // inferred from electronic annotation /// 0016020 // membrane // inferred from electronic annotation /// 0016021 // integral to membrane // inferred from electronic annotation /// 0030315 // T-tubule // inferred from electronic annotation /// 0031965 // nuclear membrane // inferred from electronic annotation	0001599 // endothelin-A receptor activity // inferred from electronic annotation /// 0004713 // protein tyrosine kinase activity // traceable author statement /// 0004871 // signal transducer activity // inferred from electronic annotation /// 0004872 // receptor activity // inferred from electronic annotation /// 0004930 // G-protein coupled receptor activity // traceable author statement /// 00…	GPCRDB_Other // GenMAPP /// Peptide_GPCRs // GenMAPP /// Prostaglandin_synthesis_regulation // GenMAPP	gb:AW558570 /DB_XREF=gi:7203915 /DB_XREF=L0295G02-3 /CLONE=L0295G02 /FEA=EST /CNT=117 /TID=Mm.45447.1 /TIER=Stack /STK=107 /UG=Mm.45447 /UG_TITLE=ESTs	0.72481	0.42616	0.75696	1.2631	0.78593	0.073889	0.24976	0.11332	0.74194	0.20755	0.33795
1438783_at	14	---	---	---	---	---	---	gb:BB325257 /DB_XREF=gi:16403556 /DB_XREF=BB325257 /CLONE=B430115G18 /FEA=EST /CNT=11 /TID=Mm.139190.1 /TIER=Stack /STK=9 /UG=Mm.139190 /UG_TITLE=ESTs	0.56847	0.49017	0.52267	1.0311	0.83113	0.152	0.38729	0.18256	0.5454	0.30306	0.46081
1439397_at	14	Fmn1	formin 1	0010467 // gene expression // inferred from mutant phenotype /// 0016043 // cellular component organization // inferred from electronic annotation /// 0030036 // actin cytoskeleton organization // inferred from electronic annotation /// 0030838 // positive regulation of actin filament polymerization // inferred from direct assay /// 0035136 // forelimb morphogenesis // inferred from mutant phenot…	0005634 // nucleus // inferred from electronic annotation /// 0005737 // cytoplasm // inferred from electronic annotation /// 0005856 // cytoskeleton // inferred from electronic annotation /// 0005886 // plasma membrane // inferred from electronic annotation /// 0005912 // adherens junction // inferred from physical interaction /// 0005912 // adherens junction // inferred from electronic annotati…	0003677 // DNA binding // inferred from direct assay /// 0003779 // actin binding // inferred from electronic annotation /// 0005515 // protein binding // inferred from physical interaction /// 0017124 // SH3 domain binding // inferred from physical interaction	---	gb:BB164513 /DB_XREF=gi:8820454 /DB_XREF=BB164513 /CLONE=A130078F14 /FEA=EST /CNT=8 /TID=Mm.128312.1 /TIER=Stack /STK=8 /UG=Mm.128312 /LL=99456 /UG_GENE=BB164513 /UG_TITLE=expressed sequence BB164513	0.67622	0.5117	0.60688	1.1618	1.0657	0.20281	0.28932	-0.095741	0.61674	0.11692	0.46962
1416321_s_at	15	Prelp	proline arginine-rich end leucine-rich repeat	0007569 // cell aging // inferred from direct assay	0005576 // extracellular region // inferred from electronic annotation /// 0005578 // proteinaceous extracellular matrix // inferred from electronic annotation	0005515 // protein binding // inferred from electronic annotation /// 0008201 // heparin binding // inferred from electronic annotation	---	gb:BC019775.1 /DB_XREF=gi:18043602 /FEA=FLmRNA /CNT=156 /TID=Mm.214514.1 /TIER=FL+Stack /STK=98 /UG=Mm.214514 /LL=116847 /UG_GENE=Prelp /DEF=Mus musculus, proline arginine-rich end leucine-rich repeat, clone MGC:25825 IMAGE:4165772, mRNA, complete cds. /PROD=proline arginine-rich end leucine-rich repeat /FL=gb:BC019775.1 gb:NM_054077.1	0.26344	0.84434	0.64471	0.87785	0.95216	0.27909	0.54188	0.3583	1.2053	0.87902	1.1094
1427883_a_at	15	Col3a1	collagen, type III, alpha 1	0001501 // skeletal system development // inferred from electronic annotation /// 0001568 // blood vessel development // inferred from mutant phenotype /// 0007160 // cell-matrix adhesion // inferred from electronic annotation /// 0007179 // transforming growth factor beta receptor signaling pathway // inferred from electronic annotation /// 0007229 // integrin-mediated signaling pathway // infer…	0005576 // extracellular region // inferred from electronic annotation /// 0005578 // proteinaceous extracellular matrix // inferred from electronic annotation /// 0005581 // collagen // inferred from direct assay /// 0005581 // collagen // inferred from electronic annotation /// 0005586 // collagen type III // inferred from direct assay /// 0031012 // extracellular matrix // inferred from direct…	0005178 // integrin binding // inferred from electronic annotation /// 0005201 // extracellular matrix structural constituent // inferred from electronic annotation /// 0005515 // protein binding // inferred from electronic annotation /// 0046332 // SMAD binding // inferred from physical interaction /// 0048407 // platelet-derived growth factor binding // not recorded /// 0048407 // platelet-deri…	Inflammatory_Response_Pathway // GenMAPP	gb:BG968894 /DB_XREF=gi:14356531 /DB_XREF=602836040F1 /CLONE=IMAGE:4990689 /FEA=mRNA /CNT=417 /TID=Mm.147387.1 /TIER=Stack /STK=75 /UG=Mm.147387 /LL=12825 /UG_GENE=Col3a1 /UG_TITLE=procollagen, type III, alpha 1	0.27301	0.31187	0.30242	0.80543	0.7304	0.4434	0.62619	0.41773	1.4691	1.1369	1.3145
1437324_x_at	15	Fmod	fibromodulin	---	0005576 // extracellular region // inferred from electronic annotation /// 0005578 // proteinaceous extracellular matrix // inferred from electronic annotation	0005515 // protein binding // inferred from electronic annotation	---	gb:BB504826 /DB_XREF=gi:9493620 /DB_XREF=BB504826 /CLONE=D630050D09 /FEA=EST /CNT=21 /TID=Mm.41573.3 /TIER=Stack /STK=20 /UG=Mm.41573 /LL=14264 /UG_GENE=Fmod /UG_TITLE=fibromodulin	0.7795	1.1674	1.1253	1.3694	1.7315	0.49532	0.72242	0.59239	1.5493	1.483	1.4921
1437685_x_at	15	Fmod	fibromodulin	---	0005576 // extracellular region // inferred from electronic annotation /// 0005578 // proteinaceous extracellular matrix // inferred from electronic annotation	0005515 // protein binding // inferred from electronic annotation	---	gb:BB235530 /DB_XREF=gi:8915238 /DB_XREF=BB235530 /CLONE=A630054J10 /FEA=EST /CNT=16 /TID=Mm.41573.8 /TIER=Stack /STK=15 /UG=Mm.41573 /LL=14264 /UG_GENE=Fmod /UG_TITLE=fibromodulin	0.79968	1.136	1.0736	1.289	1.6498	0.57851	0.73678	0.60944	1.452	1.3804	1.44
1437718_x_at	15	Fmod	fibromodulin	---	0005576 // extracellular region // inferred from electronic annotation /// 0005578 // proteinaceous extracellular matrix // inferred from electronic annotation	0005515 // protein binding // inferred from electronic annotation	---	gb:BB483571 /DB_XREF=gi:9401180 /DB_XREF=BB483571 /CLONE=D430021B16 /FEA=EST /CNT=15 /TID=Mm.41573.9 /TIER=Stack /STK=15 /UG=Mm.41573 /LL=14264 /UG_GENE=Fmod /UG_TITLE=fibromodulin	0.89182	1.2636	1.1136	1.3259	1.6348	0.57088	0.68886	0.58067	1.5201	1.3978	1.4782
1438966_x_at	15	Fmod	fibromodulin	---	0005576 // extracellular region // inferred from electronic annotation /// 0005578 // proteinaceous extracellular matrix // inferred from electronic annotation	0005515 // protein binding // inferred from electronic annotation	---	gb:AV290700 /DB_XREF=gi:6304731 /DB_XREF=AV290700 /CLONE=5230401E10 /FEA=EST /CNT=9 /TID=Mm.41573.11 /TIER=Stack /STK=9 /UG=Mm.41573 /LL=14264 /UG_GENE=Fmod /UG_TITLE=fibromodulin	0.75006	1.0703	1.0316	1.3346	1.6547	0.54902	0.76242	0.50679	1.4887	1.4487	1.5442
1456084_x_at	15	Fmod	fibromodulin	---	0005576 // extracellular region // inferred from electronic annotation /// 0005578 // proteinaceous extracellular matrix // inferred from electronic annotation	0005515 // protein binding // inferred from electronic annotation	---	gb:BB532202 /DB_XREF=gi:9584131 /DB_XREF=BB532202 /CLONE=E030022M17 /FEA=EST /CNT=17 /TID=Mm.41573.6 /TIER=Stack /STK=17 /UG=Mm.41573 /LL=14264 /UG_GENE=Fmod /UG_TITLE=fibromodulin	0.74562	0.93652	0.74203	1.1522	1.4124	0.41108	0.63724	0.45353	1.5396	1.4728	1.6304
1428455_at	16	Col14a1	collagen, type XIV, alpha 1	0007155 // cell adhesion // inferred from electronic annotation	0005576 // extracellular region // inferred from electronic annotation /// 0005578 // proteinaceous extracellular matrix // inferred from electronic annotation	0005198 // structural molecule activity // inferred from electronic annotation /// 0005515 // protein binding // inferred from electronic annotation	---	gb:BB521934 /DB_XREF=gi:15412177 /DB_XREF=BB521934 /CLONE=D930004P21 /FEA=mRNA /CNT=63 /TID=Mm.41332.2 /TIER=Stack /STK=10 /UG=Mm.41332 /LL=12818 /UG_GENE=Col14a1 /UG_TITLE=procollagen, type XIV, alpha 1	0.74722	1.0206	1.0659	1.5333	1.5581	0.5402	0.90518	0.48353	0.60528	0.67642	0.70763
1437889_x_at	16	Bgn	biglycan	0001974 // blood vessel remodeling // inferred from electronic annotation /// 0019800 // peptide cross-linking via chondroitin 4-sulfate glycosaminoglycan // inferred from direct assay	0005576 // extracellular region // inferred from electronic annotation /// 0005578 // proteinaceous extracellular matrix // inferred from electronic annotation /// 0009986 // cell surface // inferred from sequence or structural similarity /// 0009986 // cell surface // inferred from direct assay /// 0030133 // transport vesicle // inferred from electronic annotation /// 0031012 // extracellular m…	0005515 // protein binding // inferred from electronic annotation /// 0005539 // glycosaminoglycan binding // inferred from direct assay /// 0050840 // extracellular matrix binding // inferred from direct assay	---	gb:AI931862 /DB_XREF=gi:5668347 /DB_XREF=ul67a07.x1 /CLONE=IMAGE:2135604 /FEA=EST /CNT=18 /TID=Mm.2608.2 /TIER=Stack /STK=13 /UG=Mm.2608 /LL=12111 /UG_GENE=Bgn /UG_TITLE=biglycan	0.69176	0.89065	1.2281	1.783	1.6463	0.43922	0.62431	0.41869	0.83656	0.73925	0.37569
1448323_a_at	16	Bgn	biglycan	0001974 // blood vessel remodeling // inferred from electronic annotation /// 0019800 // peptide cross-linking via chondroitin 4-sulfate glycosaminoglycan // inferred from direct assay	0005576 // extracellular region // inferred from electronic annotation /// 0005578 // proteinaceous extracellular matrix // inferred from electronic annotation /// 0009986 // cell surface // inferred from sequence or structural similarity /// 0009986 // cell surface // inferred from direct assay /// 0030133 // transport vesicle // inferred from electronic annotation /// 0031012 // extracellular m…	0005515 // protein binding // inferred from electronic annotation /// 0005539 // glycosaminoglycan binding // inferred from direct assay /// 0050840 // extracellular matrix binding // inferred from direct assay	---	gb:BC019502.1 /DB_XREF=gi:18044514 /FEA=FLmRNA /CNT=224 /TID=Mm.2608.1 /TIER=FL+Stack /STK=91 /UG=Mm.2608 /LL=12111 /UG_GENE=Bgn /DEF=Mus musculus, biglycan, clone MGC:28669 IMAGE:4237268, mRNA, complete cds. /PROD=biglycan /FL=gb:BC005452.1 gb:NM_007542.2 gb:L20276.1 gb:BC019502.1	0.71943	0.9012	1.2781	1.7904	1.6504	0.49918	0.7295	0.43778	0.8188	0.70024	0.37601
1460412_at	16	Fbln7	fibulin 7	0007155 // cell adhesion // inferred from electronic annotation	0005576 // extracellular region // inferred from electronic annotation /// 0005578 // proteinaceous extracellular matrix // inferred from electronic annotation	0005509 // calcium ion binding // inferred from electronic annotation /// 0005515 // protein binding // inferred from electronic annotation /// 0008201 // heparin binding // inferred from electronic annotation	---	gb:AA222756 /DB_XREF=gi:1843067 /DB_XREF=mv71c11.r1 /CLONE=IMAGE:660500 /FEA=mRNA /CNT=24 /TID=Mm.30716.1 /TIER=ConsEnd /STK=0 /UG=Mm.30716 /LL=70370 /UG_GENE=1600015H20Rik /UG_TITLE=RIKEN cDNA 1600015H20 gene	0.4053	0.89691	1.1118	1.3345	1.2526	0.9352	0.93459	0.71596	0.82261	0.74848	0.79356
1417444_at	17	E2f5	E2F transcription factor 5	0000082 // G1/S transition of mitotic cell cycle // traceable author statement /// 0006350 // transcription // inferred from electronic annotation /// 0006355 // regulation of transcription, DNA-dependent // inferred from direct assay /// 0006355 // regulation of transcription, DNA-dependent // inferred from electronic annotation /// 0009887 // organ morphogenesis // inferred from mutant phenotyp…	0005634 // nucleus // inferred from direct assay /// 0005634 // nucleus // inferred from electronic annotation /// 0005635 // nuclear envelope // traceable author statement /// 0005667 // transcription factor complex // inferred from electronic annotation /// 0005737 // cytoplasm // inferred from direct assay	0003677 // DNA binding // inferred from electronic annotation /// 0003700 // transcription factor activity // inferred from direct assay /// 0003700 // transcription factor activity // inferred from electronic annotation /// 0005515 // protein binding // inferred from physical interaction	Cell_Cycle_KEGG // GenMAPP /// G1_to_S_cell_cycle_Reactome // GenMAPP	gb:BC003220.1 /DB_XREF=gi:13096847 /FEA=FLmRNA /CNT=68 /TID=Mm.379.1 /TIER=FL+Stack /STK=45 /UG=Mm.379 /LL=13559 /UG_GENE=E2f5 /DEF=Mus musculus, Similar to E2F transcription factor 5, clone MGC:6043 IMAGE:3482306, mRNA, complete cds. /PROD=Similar to E2F transcription factor 5 /FL=gb:NM_007892.1 gb:BC003220.1	0.49665	0.28124	0.5102	0.83079	0.78093	-0.2993	-0.18992	-0.2886	0.50429	0.26568	0.12625
1449373_at	17	Dnajc3	DnaJ (Hsp40) homolog, subfamily C, member 3	0006469 // negative regulation of protein kinase activity // inferred from sequence or structural similarity /// 0006986 // response to unfolded protein // inferred from electronic annotation	0005737 // cytoplasm // inferred from direct assay /// 0005783 // endoplasmic reticulum // inferred from electronic annotation /// 0031205 // endoplasmic reticulum Sec complex // inferred from direct assay	0004860 // protein kinase inhibitor activity // inferred from sequence or structural similarity /// 0005488 // binding // inferred from electronic annotation /// 0031072 // heat shock protein binding // inferred from electronic annotation	---	gb:BE624323 /DB_XREF=gi:9904739 /DB_XREF=uu45b07.y1 /CLONE=IMAGE:3374869 /FEA=FLmRNA /CNT=147 /TID=Mm.12616.1 /TIER=ConsEnd /STK=0 /UG=Mm.12616 /LL=19107 /UG_GENE=Dnajc3 /UG_TITLE=DnaJ (Hsp40) homolog, subfamily C, member 3 /FL=gb:U28423.1 gb:NM_008929.1 gb:BC013766.1	0.25153	0.33555	0.45189	1.0341	0.66808	-0.65857	-0.19744	-0.18775	0.17004	0.29736	0.13067
1450896_at	17	Arhgap5	Rho GTPase activating protein 5	0002053 // positive regulation of mesenchymal cell proliferation // inferred from mutant phenotype /// 0007165 // signal transduction // inferred from electronic annotation /// 0007264 // small GTPase mediated signal transduction // inferred from electronic annotation /// 0008361 // regulation of cell size // inferred from mutant phenotype /// 0030335 // positive regulation of cell migration // i…	0005622 // intracellular // inferred from electronic annotation /// 0005737 // cytoplasm // inferred from electronic annotation /// 0016020 // membrane // inferred from electronic annotation	0005096 // GTPase activator activity // inferred from electronic annotation /// 0005525 // GTP binding // inferred from electronic annotation /// 0042169 // SH2 domain binding // inferred from electronic annotation	---	gb:AV006000 /DB_XREF=gi:4782850 /DB_XREF=AV006000 /CLONE=1020004A17 /FEA=FLmRNA /CNT=161 /TID=Mm.35059.1 /TIER=Stack /STK=30 /UG=Mm.35059 /LL=11855 /UG_GENE=Arhgap5 /UG_TITLE=Rho GTPase activating protein 5 /FL=gb:NM_009706.1	0.61477	0.18536	0.48228	0.64252	0.68087	-0.64301	-0.33433	-0.47421	0.30974	0.29095	0.055269
1456786_at	17	Ldb2	LIM domain binding 2	0007275 // multicellular organismal development // inferred from electronic annotation	0005634 // nucleus // inferred from electronic annotation /// 0005634 // nucleus // inferred from sequence or structural similarity	0003712 // transcription cofactor activity // inferred from electronic annotation /// 0030274 // LIM domain binding // inferred from sequence or structural similarity	---	gb:BB097063 /DB_XREF=gi:8742097 /DB_XREF=BB097063 /CLONE=9430058A09 /FEA=EST /CNT=9 /TID=Mm.200482.1 /TIER=ConsEnd /STK=7 /UG=Mm.200482 /LL=100934 /UG_GENE=AW146358 /UG_TITLE=expressed sequence AW146358	0.46368	0.019341	0.57594	0.89486	0.84499	-0.34247	0.08636	-0.27691	0.4459	0.47283	0.23924
1435632_at	18	Nufip2	nuclear fragile X mental retardation protein interacting protein 2	---	0005634 // nucleus // inferred from electronic annotation /// 0005634 // nucleus // inferred from sequence or structural similarity /// 0005737 // cytoplasm // inferred from electronic annotation /// 0005737 // cytoplasm // inferred from sequence or structural similarity /// 0005794 // Golgi apparatus // inferred from electronic annotation /// 0042788 // polysomal ribosome // inferred from electr…	0003723 // RNA binding // inferred from electronic annotation /// 0003723 // RNA binding // inferred from sequence or structural similarity /// 0005515 // protein binding // inferred from electronic annotation /// 0005515 // protein binding // inferred from sequence or structural similarity	---	gb:BF472622 /DB_XREF=gi:11541763 /DB_XREF=UI-M-BH3-axd-a-10-0-UI.r1 /CLONE=UI-M-BH3-axd-a-10-0-UI /FEA=EST /CNT=147 /TID=Mm.37799.1 /TIER=Stack /STK=14 /UG=Mm.37799 /UG_TITLE=ESTs, Weakly similar to SEX-DETERMINING REGION Y PROTEIN (M.musculus)	0.11298	0.13186	0.57048	0.65571	0.6104	-0.60567	-0.40825	-0.1652	0.050768	0.11386	0.044188
1435906_x_at	18	Gbp2	guanylate binding protein 2	0006955 // immune response // inferred from electronic annotation	0005886 // plasma membrane // inferred from electronic annotation /// 0016020 // membrane // inferred from electronic annotation	0000166 // nucleotide binding // inferred from electronic annotation /// 0003924 // GTPase activity // inferred from sequence or structural similarity /// 0003924 // GTPase activity // inferred from electronic annotation /// 0005525 // GTP binding // inferred from electronic annotation	---	gb:BE197524 /DB_XREF=gi:8709693 /DB_XREF=us74c05.x1 /CLONE=IMAGE:3256904 /FEA=EST /CNT=17 /TID=Mm.24038.2 /TIER=Stack /STK=12 /UG=Mm.24038 /LL=14469 /UG_GENE=Gbp2 /UG_TITLE=guanylate nucleotide binding protein 2	0.34246	0.201	0.39522	0.73769	0.59785	-0.57629	-0.49472	-0.36928	0.15777	0.2897	-0.12523
1455822_x_at	18	Surf4	surfeit gene 4	---	0005783 // endoplasmic reticulum // inferred from electronic annotation /// 0005793 // ER-Golgi intermediate compartment // inferred from electronic annotation /// 0016020 // membrane // inferred from electronic annotation /// 0016021 // integral to membrane // inferred from electronic annotation	0005515 // protein binding // inferred from electronic annotation	---	gb:AV311750 /DB_XREF=gi:6364785 /DB_XREF=AV311750 /CLONE=5730600B17 /FEA=EST /CNT=52 /TID=Mm.2795.6 /TIER=Stack /STK=49 /UG=Mm.2795 /LL=20932 /UG_GENE=Surf4 /UG_TITLE=surfeit gene 4	0.50378	0.36148	0.43577	0.59604	0.5486	-0.51409	-0.59422	-0.27193	0.16275	-0.061108	-0.30264
1428549_at	19	Ccdc3	coiled-coil domain containing 3	---	0005783 // endoplasmic reticulum // inferred from electronic annotation	---	---	gb:AK009833.1 /DB_XREF=gi:12844871 /FEA=mRNA /CNT=49 /TID=Mm.18797.1 /TIER=Stack /STK=33 /UG=Mm.18797 /LL=74186 /UG_GENE=2310045O21Rik /UG_TITLE=RIKEN cDNA 2310045O21 gene /DEF=Mus musculus adult male tongue cDNA, RIKEN full-length enriched library, clone:2310045O21:hypothetical protein, full insert sequence.	0.075475	0.47428	0.93589	1.16	0.91737	0.45538	0.50998	0.39644	0.46458	0.33755	0.020906
1439128_at	19	Zbtb20	zinc finger and BTB domain containing 20	0006350 // transcription // inferred from electronic annotation /// 0045449 // regulation of transcription // inferred from electronic annotation	0005622 // intracellular // inferred from electronic annotation /// 0005634 // nucleus // inferred from direct assay /// 0005634 // nucleus // inferred from electronic annotation	0003676 // nucleic acid binding // inferred from electronic annotation /// 0003677 // DNA binding // inferred from direct assay /// 0003677 // DNA binding // inferred from electronic annotation /// 0005515 // protein binding // inferred from electronic annotation /// 0008270 // zinc ion binding // inferred from electronic annotation /// 0046872 // metal ion binding // inferred from electronic ann…	---	gb:AI595815 /DB_XREF=gi:4604863 /DB_XREF=uj69g03.x1 /CLONE=IMAGE:1925236 /FEA=EST /CNT=11 /TID=Mm.63382.2 /TIER=Stack /STK=8 /UG=Mm.63382 /UG_TITLE=ESTs	0.24305	0.29001	1.1177	0.98759	1.1055	0.40148	0.56221	0.25176	0.47849	0.33551	-0.093207
1460600_at	19	AA414768	expressed sequence AA414768	---	---	---	---	gb:AW550321 /DB_XREF=gi:7195749 /DB_XREF=L0063A12-3 /CLONE=L0063A12 /FEA=EST /CNT=15 /TID=Mm.38094.1 /TIER=Stack /STK=11 /UG=Mm.38094 /UG_TITLE=ESTs, Weakly similar to T21349 hypothetical protein F25H2.8 - Caenorhabditis elegans (C.elegans)	0.61286	0.34799	0.97306	0.9854	0.88588	0.13448	0.17664	-0.075551	0.58172	0.087815	-0.064908
1437492_at	20	Mkx	mohawk homeobox	0006355 // regulation of transcription, DNA-dependent // inferred from electronic annotation /// 0007275 // multicellular organismal development // inferred from electronic annotation /// 0007517 // muscle organ development // inferred from expression pattern /// 0045449 // regulation of transcription // inferred from electronic annotation	0005634 // nucleus // inferred from electronic annotation	0003677 // DNA binding // inferred from electronic annotation /// 0003700 // transcription factor activity // inferred from electronic annotation /// 0030528 // transcription regulator activity // inferred from electronic annotation /// 0043565 // sequence-specific DNA binding // inferred from electronic annotation	---	gb:BB021019 /DB_XREF=gi:16257677 /DB_XREF=BB021019 /CLONE=5330404I04 /FEA=EST /CNT=22 /TID=Mm.99898.1 /TIER=Stack /STK=17 /UG=Mm.99898 /UG_TITLE=ESTs	0.61069	0.44917	0.59796	0.6703	0.8757	-0.065293	0.026467	-0.15789	0.49933	0.30133	-0.08179
1442903_at	20	4732423E21Rik	RIKEN cDNA 4732423E21 gene	---	---	---	---	gb:AV237721 /DB_XREF=gi:16386380 /DB_XREF=AV237721 /CLONE=4732423E21 /FEA=EST /CNT=4 /TID=Mm.208297.1 /TIER=ConsEnd /STK=3 /UG=Mm.208297 /UG_TITLE=ESTs	0.42038	0.46408	0.7106	0.98115	0.89319	0.02599	0.051941	0.072958	0.48458	0.26404	-0.062404
1434758_at	21	Crispld2	cysteine-rich secretory protein LCCL domain containing 2	0030198 // extracellular matrix organization // inferred from direct assay	0005576 // extracellular region // inferred from electronic annotation /// 0030133 // transport vesicle // inferred from electronic annotation /// 0031012 // extracellular matrix // inferred from direct assay	0005539 // glycosaminoglycan binding // inferred from direct assay /// 0008201 // heparin binding // inferred from direct assay	---	gb:BB745401 /DB_XREF=gi:16148340 /DB_XREF=BB745401 /CLONE=F530008F12 /FEA=EST /CNT=35 /TID=Mm.59441.1 /TIER=Stack /STK=25 /UG=Mm.59441 /UG_TITLE=ESTs	0.73949	1.0024	0.64562	1.3028	1.0233	0.07542	0.37399	0.25186	0.37357	0.17129	0.3587
1452679_at	21	Tubb2b	tubulin, beta 2B	0007017 // microtubule-based process // inferred from electronic annotation /// 0007018 // microtubule-based movement // inferred from electronic annotation /// 0007067 // mitosis // inferred from electronic annotation /// 0030182 // neuron differentiation // inferred from electronic annotation /// 0051258 // protein polymerization // inferred from electronic annotation	0005874 // microtubule // inferred from electronic annotation /// 0043234 // protein complex // inferred from electronic annotation	0000166 // nucleotide binding // inferred from electronic annotation /// 0003924 // GTPase activity // inferred from electronic annotation /// 0005198 // structural molecule activity // inferred from electronic annotation /// 0005515 // protein binding // inferred from electronic annotation /// 0005525 // GTP binding // inferred from electronic annotation	---	gb:AA986082 /DB_XREF=gi:3167957 /DB_XREF=uc81d12.x1 /CLONE=IMAGE:1432055 /FEA=mRNA /CNT=201 /TID=Mm.200858.2 /TIER=Stack /STK=92 /UG=Mm.200858 /LL=73710 /UG_GENE=2410129E14Rik /UG_TITLE=RIKEN cDNA 2410129E14 gene	1.1101	0.93163	0.54113	1.0595	1.1335	0.077338	0.22632	0.11563	0.36528	0.37587	0.4768
1429178_at	22	Odz3	odd Oz/ten-m homolog 3 (Drosophila)	0007165 // signal transduction // inferred from electronic annotation	0005887 // integral to plasma membrane // inferred from sequence or structural similarity /// 0016020 // membrane // inferred from electronic annotation /// 0016021 // integral to membrane // inferred from electronic annotation	---	---	gb:BB472509 /DB_XREF=gi:16428053 /DB_XREF=BB472509 /CLONE=D230045I11 /FEA=mRNA /CNT=14 /TID=Mm.45150.1 /TIER=Stack /STK=10 /UG=Mm.45150 /LL=70327 /UG_GENE=2610100B16Rik /UG_TITLE=RIKEN cDNA 2610100B16 gene	0.62844	0.50743	0.55665	0.97894	1.0206	-0.040568	-0.048175	0.11815	0.31488	0.30863	0.34529
1437152_at	22	Mex3b	mex3 homolog B (C. elegans)	---	0000932 // cytoplasmic mRNA processing body // inferred from electronic annotation /// 0005634 // nucleus // inferred from electronic annotation /// 0005737 // cytoplasm // inferred from electronic annotation	0003723 // RNA binding // inferred from electronic annotation /// 0005515 // protein binding // inferred from electronic annotation /// 0008270 // zinc ion binding // inferred from electronic annotation /// 0046872 // metal ion binding // inferred from electronic annotation	---	gb:BG072837 /DB_XREF=gi:12555406 /DB_XREF=H3115E07-3 /CLONE=H3115E07 /FEA=EST /CNT=42 /TID=Mm.120835.1 /TIER=Stack /STK=24 /UG=Mm.120835 /UG_TITLE=ESTs, Weakly similar to T29029 hypothetical protein F53G12.5 - Caenorhabditis elegans (C.elegans)	0.81968	0.73956	0.54015	1.0348	0.99419	0.034752	-0.025813	0.09707	0.27183	0.30806	0.18857
1424567_at	23	Tspan2	tetraspanin 2	0010001 // glial cell differentiation // inferred from electronic annotation	0016020 // membrane // inferred from electronic annotation /// 0016021 // integral to membrane // inferred from electronic annotation	0019911 // structural constituent of myelin sheath // inferred from electronic annotation	---	gb:BC007185.1 /DB_XREF=gi:13938137 /FEA=FLmRNA /CNT=152 /TID=Mm.27469.1 /TIER=FL+Stack /STK=24 /UG=Mm.27469 /LL=70747 /UG_GENE=6330415F13Rik /DEF=Mus musculus, RIKEN cDNA 6330415F13 gene, clone MGC:8230 IMAGE:3591472, mRNA, complete cds. /PROD=RIKEN cDNA 6330415F13 gene /FL=gb:BC007185.1	0.36196	0.91315	0.62773	1.0772	0.79278	-0.11501	-0.033623	0.12692	0.43291	0.34724	0.28446
1439774_at	23	Prrx1	paired related homeobox 1	0002053 // positive regulation of mesenchymal cell proliferation // inferred from genetic interaction /// 0006355 // regulation of transcription, DNA-dependent // inferred from electronic annotation /// 0007275 // multicellular organismal development // inferred from electronic annotation /// 0030326 // embryonic limb morphogenesis // inferred from genetic interaction /// 0042472 // inner ear mor…	0005634 // nucleus // inferred from direct assay /// 0005634 // nucleus // inferred from electronic annotation	0003677 // DNA binding // inferred from direct assay /// 0003677 // DNA binding // inferred from electronic annotation /// 0003700 // transcription factor activity // inferred from electronic annotation /// 0030528 // transcription regulator activity // inferred from electronic annotation /// 0043565 // sequence-specific DNA binding // inferred from electronic annotation	---	gb:BB051738 /DB_XREF=gi:15404051 /DB_XREF=BB051738 /CLONE=6720434F24 /FEA=EST /CNT=20 /TID=Mm.130748.1 /TIER=ConsEnd /STK=6 /UG=Mm.130748 /LL=98443 /UG_GENE=AI843499 /UG_TITLE=expressed sequence AI843499	0.51745	0.78353	0.79231	0.97913	1.0767	-0.10415	0.020983	0.019506	0.40223	0.40484	0.2834
1424176_a_at	24	Anxa4	annexin A4	0001822 // kidney development // not recorded	0016324 // apical plasma membrane // not recorded	0005509 // calcium ion binding // inferred from electronic annotation /// 0005544 // calcium-dependent phospholipid binding // inferred from electronic annotation	Prostaglandin_synthesis_regulation // GenMAPP	gb:BE628614 /DB_XREF=gi:9911302 /DB_XREF=uu03b04.x1 /CLONE=IMAGE:3370831 /FEA=FLmRNA /CNT=77 /TID=Mm.619.2 /TIER=Stack /STK=9 /UG=Mm.619 /LL=11746 /UG_GENE=Anxa4 /UG_TITLE=annexin A4 /FL=gb:U95371.1	0.083315	0.53191	0.56204	0.70638	0.54065	-0.16843	0.16019	-0.035913	0.3307	0.1485	0.18912
1438661_a_at	24	Arf2	ADP-ribosylation factor 2	0006810 // transport // inferred from electronic annotation /// 0007264 // small GTPase mediated signal transduction // inferred from electronic annotation /// 0015031 // protein transport // traceable author statement /// 0015031 // protein transport // inferred from electronic annotation /// 0016192 // vesicle-mediated transport // inferred from electronic annotation	0005622 // intracellular // inferred from electronic annotation /// 0005794 // Golgi apparatus // inferred from direct assay /// 0005794 // Golgi apparatus // inferred from electronic annotation	0000166 // nucleotide binding // inferred from electronic annotation /// 0005515 // protein binding // inferred from physical interaction /// 0005525 // GTP binding // traceable author statement /// 0005525 // GTP binding // inferred from electronic annotation	---	gb:AV023312 /DB_XREF=gi:4800304 /DB_XREF=AV023312 /CLONE=1190032A18 /FEA=EST /CNT=10 /TID=Mm.5061.2 /TIER=Stack /STK=10 /UG=Mm.5061 /LL=11841 /UG_GENE=Arf2 /UG_TITLE=ADP-ribosylation factor 2	0.32111	0.41608	0.71929	0.76124	0.63954	-0.28621	0.033557	-0.16316	0.26904	0.075552	0.28504
1419042_at	25	Iigp1	interferon inducible GTPase 1	0019221 // cytokine-mediated signaling pathway // traceable author statement	0005634 // nucleus // inferred from electronic annotation /// 0005737 // cytoplasm // inferred from electronic annotation /// 0005783 // endoplasmic reticulum // inferred from electronic annotation /// 0005794 // Golgi apparatus // inferred from electronic annotation /// 0016020 // membrane // inferred from electronic annotation /// 0019898 // extrinsic to membrane // inferred from electronic ann…	0000166 // nucleotide binding // inferred from electronic annotation /// 0003924 // GTPase activity // inferred from direct assay /// 0003924 // GTPase activity // inferred from sequence or structural similarity /// 0005525 // GTP binding // inferred from direct assay /// 0005525 // GTP binding // inferred from electronic annotation /// 0016787 // hydrolase activity // inferred from electronic an…	---	gb:NM_021792.1 /DB_XREF=gi:11140830 /GEN=Iigp-pending /FEA=FLmRNA /CNT=97 /TID=Mm.29008.1 /TIER=FL+Stack /STK=14 /UG=Mm.29008 /LL=60440 /DEF=Mus musculus interferon-inducible GTPase (Iigp-pending), mRNA. /PROD=interferon-inducible GTPase /FL=gb:AF194871.1 gb:NM_021792.1	-0.15721	-0.11655	-0.083463	0.16764	0.58146	-0.76616	-0.57985	-0.52494	-0.19585	0.14182	-0.036
1455901_at	25	Chpt1	choline phosphotransferase 1	0006656 // phosphatidylcholine biosynthetic process // inferred from sequence or structural similarity /// 0006663 // platelet activating factor biosynthetic process // inferred from sequence or structural similarity /// 0008654 // phospholipid biosynthetic process // inferred from electronic annotation	0005794 // Golgi apparatus // inferred from electronic annotation /// 0016020 // membrane // inferred from electronic annotation /// 0016021 // integral to membrane // inferred from electronic annotation	0000287 // magnesium ion binding // inferred from electronic annotation /// 0004142 // diacylglycerol cholinephosphotransferase activity // inferred from electronic annotation /// 0004142 // diacylglycerol cholinephosphotransferase activity // inferred from sequence or structural similarity /// 0016740 // transferase activity // inferred from electronic annotation /// 0016780 // phosphotransferas…	---	gb:AI642069 /DB_XREF=gi:4720544 /DB_XREF=ub75d10.x1 /CLONE=IMAGE:1383571 /FEA=EST /CNT=121 /TID=Mm.21754.4 /TIER=Stack /STK=27 /UG=Mm.21754 /UG_TITLE=Mus musculus 10 day old male pancreas cDNA, RIKEN full-length enriched library, clone:1810073D20:synaptonemal complex protein 3, full insert sequence	0.14227	0.022771	0.22753	0.52807	0.43572	-1.0238	-0.9012	-0.50736	0.06446	0.093274	-0.14047
1418749_at	26	Psd3	pleckstrin and Sec7 domain containing 3	0032011 // ARF protein signal transduction // inferred by curator /// 0032012 // regulation of ARF protein signal transduction // inferred from electronic annotation	0005622 // intracellular // inferred from electronic annotation /// 0005624 // membrane fraction // inferred from direct assay /// 0005886 // plasma membrane // inferred from electronic annotation /// 0014069 // postsynaptic density // inferred from electronic annotation /// 0016020 // membrane // inferred from electronic annotation /// 0030054 // cell junction // inferred from electronic annotat…	0005085 // guanyl-nucleotide exchange factor activity // inferred from electronic annotation /// 0005086 // ARF guanyl-nucleotide exchange factor activity // inferred from direct assay /// 0005086 // ARF guanyl-nucleotide exchange factor activity // inferred from electronic annotation	Proteasome_Degradation // GenMAPP	gb:NM_030263.1 /DB_XREF=gi:13385177 /GEN=BC003498 /FEA=FLmRNA /CNT=30 /TID=Mm.37607.1 /TIER=FL+Stack /STK=19 /UG=Mm.37607 /LL=80295 /DEF=Mus musculus hypothetical protein, MGC:6957 (BC003498), mRNA. /PROD=hypothetical protein, MGC:6957 /FL=gb:NM_030263.1 gb:BC003498.1	0.27987	0.49312	0.64918	0.74775	0.80814	0.038626	0.021048	-0.13795	0.29738	0.24413	-0.10233
1444029_at	26	Parp11	poly (ADP-ribose) polymerase family, member 11	---	0005634 // nucleus // inferred from electronic annotation	0003950 // NAD+ ADP-ribosyltransferase activity // inferred from electronic annotation /// 0016740 // transferase activity // inferred from electronic annotation /// 0016757 // transferase activity, transferring glycosyl groups // inferred from electronic annotation	---	gb:BB028141 /DB_XREF=gi:15403524 /DB_XREF=BB028141 /CLONE=5330440K11 /FEA=EST /CNT=6 /TID=Mm.110818.1 /TIER=ConsEnd /STK=2 /UG=Mm.110818 /UG_TITLE=ESTs	-0.32633	0.51584	0.59032	0.57402	0.85465	-0.027675	0.19157	0.076552	0.10567	0.19116	0.14631
1415944_at	27	Sdc1	syndecan 1	0001822 // kidney development // inferred from electronic annotation /// 0009636 // response to toxin // inferred from electronic annotation /// 0042060 // wound healing // inferred from electronic annotation /// 0042476 // odontogenesis // inferred from electronic annotation /// 0042542 // response to hydrogen peroxide // inferred from electronic annotation /// 0048627 // myoblast development //…	0001931 // uropod // inferred from electronic annotation /// 0005737 // cytoplasm // inferred from electronic annotation /// 0005925 // focal adhesion // inferred from electronic annotation /// 0009986 // cell surface // inferred from direct assay /// 0016020 // membrane // inferred from electronic annotation /// 0016021 // integral to membrane // inferred from electronic annotation /// 0043234 /…	0008022 // protein C-terminus binding // inferred from electronic annotation /// 0008092 // cytoskeletal protein binding // inferred from electronic annotation	---	gb:NM_011519.1 /DB_XREF=gi:6755437 /GEN=Sdc1 /FEA=FLmRNA /CNT=374 /TID=Mm.2580.1 /TIER=FL+Stack /STK=19 /UG=Mm.2580 /LL=20969 /DEF=Mus musculus syndecan 1 (Sdc1), mRNA. /PROD=syndecan 1 /FL=gb:BC010560.1 gb:NM_011519.1	0.67423	0.50118	0.55816	1.0621	0.73333	0.24198	0.35942	0.14515	0.35823	0.217	0.13008
1417730_at	27	Ext1	exostoses (multiple) 1	0001503 // ossification // inferred from electronic annotation /// 0007369 // gastrulation // inferred from mutant phenotype /// 0007492 // endoderm development // inferred from mutant phenotype /// 0007498 // mesoderm development // inferred from mutant phenotype /// 0015012 // heparan sulfate proteoglycan biosynthetic process // inferred from direct assay /// 0015014 // heparan sulfate proteogl…	0005783 // endoplasmic reticulum // inferred from electronic annotation /// 0005794 // Golgi apparatus // inferred from electronic annotation /// 0016020 // membrane // inferred from electronic annotation /// 0016021 // integral to membrane // inferred from electronic annotation /// 0030176 // integral to endoplasmic reticulum membrane // inferred from direct assay /// 0031227 // intrinsic to end…	0005515 // protein binding // inferred from electronic annotation /// 0016740 // transferase activity // inferred from electronic annotation /// 0016757 // transferase activity, transferring glycosyl groups // inferred from electronic annotation /// 0016758 // transferase activity, transferring hexosyl groups // inferred from electronic annotation /// 0042803 // protein homodimerization activity …	---	gb:NM_010162.1 /DB_XREF=gi:7106308 /GEN=Ext1 /FEA=FLmRNA /CNT=92 /TID=Mm.1424.1 /TIER=FL+Stack /STK=37 /UG=Mm.1424 /LL=14042 /DEF=Mus musculus exostoses (multiple) 1 (Ext1), mRNA. /PROD=exostoses (multiple) 1 /FL=gb:NM_010162.1 gb:U78539.1 gb:BC004741.1	0.66951	0.44365	0.60687	1.0144	0.74256	0.2844	0.29079	0.18583	0.52449	0.30629	0.17201
1456515_s_at	28	Tcfl5	transcription factor-like 5 (basic helix-loop-helix)	0006355 // regulation of transcription, DNA-dependent // inferred from electronic annotation /// 0007283 // spermatogenesis // inferred from electronic annotation /// 0007283 // spermatogenesis // inferred from sequence or structural similarity /// 0042127 // regulation of cell proliferation // inferred from electronic annotation /// 0042127 // regulation of cell proliferation // inferred from se…	0001673 // male germ cell nucleus // inferred from direct assay /// 0005634 // nucleus // inferred from electronic annotation /// 0005634 // nucleus // inferred from sequence or structural similarity	0003677 // DNA binding // inferred from direct assay /// 0030528 // transcription regulator activity // inferred from electronic annotation	---	gb:AV044715 /DB_XREF=gi:4864380 /DB_XREF=AV044715 /CLONE=1700038G11 /FEA=EST /CNT=12 /TID=Mm.141312.2 /TIER=Stack /STK=9 /UG=Mm.141312 /LL=12841 /UG_GENE=Col9a3 /UG_TITLE=procollagen, type IX, alpha 3	0.68896	0.55187	0.60689	1.0514	0.7072	-0.28827	-0.012087	-0.19762	0.44362	0.30673	0.27333
1455406_at	29	Cask	calcium/calmodulin-dependent serine protein kinase (MAGUK family)	0006468 // protein amino acid phosphorylation // inferred from electronic annotation /// 0045944 // positive regulation of transcription from RNA polymerase II promoter // inferred from genetic interaction	0005634 // nucleus // inferred from electronic annotation /// 0005737 // cytoplasm // inferred from electronic annotation /// 0005829 // cytosol // inferred from direct assay /// 0005886 // plasma membrane // inferred from electronic annotation /// 0016020 // membrane // inferred from electronic annotation /// 0016323 // basolateral plasma membrane // inferred from direct assay /// 0019717 // syn…	0000166 // nucleotide binding // inferred from electronic annotation /// 0004672 // protein kinase activity // inferred from electronic annotation /// 0004674 // protein serine/threonine kinase activity // inferred from electronic annotation /// 0005515 // protein binding // inferred from physical interaction /// 0005515 // protein binding // inferred from electronic annotation /// 0005516 // cal…	---	gb:AV251542 /DB_XREF=gi:16387638 /DB_XREF=AV251542 /CLONE=4833431M13 /FEA=EST /CNT=20 /TID=Mm.23057.1 /TIER=Stack /STK=14 /UG=Mm.23057 /UG_TITLE=ESTs	0.51041	0.53382	0.68924	1.207	1.0914	0.094964	0.24177	0.13577	0.37317	0.11798	-0.071231
1452406_x_at	30	Erdr1	erythroid differentiation regulator 1	---	---	---	---	gb:AJ007909.1 /DB_XREF=gi:3336885 /GEN=edr /FEA=mRNA /CNT=7 /TID=Mm.35829.2 /TIER=ConsEnd /STK=5 /UG=Mm.35829 /LL=170942 /DEF=Mus musculus mRNA for erythroid differentiation regulator, partial. /PROD=erythroid differentiation regulator	-0.065315	0.049228	-0.37826	0.056233	-0.26959	0.9314	0.82136	0.92757	-0.58294	-0.13324	-0.28458
1451939_a_at	31	Rpgr /// Srpx	retinitis pigmentosa GTPase regulator /// sushi-repeat-containing protein	0007601 // visual perception // inferred from mutant phenotype /// 0007601 // visual perception // inferred from electronic annotation /// 0007601 // visual perception // inferred from sequence or structural similarity /// 0042462 // eye photoreceptor cell development // inferred from mutant phenotype /// 0050896 // response to stimulus // inferred from electronic annotation	0005737 // cytoplasm // inferred from direct assay /// 0005794 // Golgi apparatus // inferred from direct assay /// 0005794 // Golgi apparatus // inferred from electronic annotation /// 0005929 // cilium // inferred from direct assay	0005085 // guanyl-nucleotide exchange factor activity // inferred from electronic annotation /// 0005515 // protein binding // inferred from physical interaction	---	gb:AB028050.1 /DB_XREF=gi:6475036 /GEN=drs-2 /FEA=FLmRNA /CNT=1 /TID=Mm.1927.2 /TIER=FL /STK=1 /UG=Mm.1927 /LL=51795 /DEF=Mus musculus drs-2 mRNA for sushi-repeat-containing protein, complete cds. /PROD=sushi-repeat-containing protein /FL=gb:AB028050.1	0.31446	0.55952	0.54995	0.64008	1.1441	0.0077423	0.050805	0.029274	0.44872	0.33672	0.19505
1449353_at	32	Zmat3	zinc finger matrin type 3	0006810 // transport // inferred from electronic annotation /// 0006915 // apoptosis // inferred from electronic annotation /// 0006917 // induction of apoptosis // inferred from electronic annotation /// 0006974 // response to DNA damage stimulus // inferred from electronic annotation /// 0015031 // protein transport // inferred from electronic annotation /// 0030308 // negative regulation of ce…	0005622 // intracellular // inferred from electronic annotation /// 0005634 // nucleus // inferred from electronic annotation /// 0005730 // nucleolus // inferred from electronic annotation	0003676 // nucleic acid binding // inferred from electronic annotation /// 0003723 // RNA binding // inferred from electronic annotation /// 0008270 // zinc ion binding // inferred from electronic annotation /// 0046872 // metal ion binding // inferred from electronic annotation	---	gb:NM_009517.1 /DB_XREF=gi:6678584 /GEN=Wig1 /FEA=FLmRNA /CNT=40 /TID=Mm.35705.1 /TIER=FL+Stack /STK=13 /UG=Mm.35705 /LL=22401 /DEF=Mus musculus wild-type p53-induced gene 1 (Wig1), mRNA. /PROD=wild-type p53-induced gene 1 /FL=gb:AF012923.1 gb:NM_009517.1	0.39768	0.36659	0.57526	1.0317	0.81207	0.16284	0.060649	0.034113	0.48834	0.35544	0.22226
1448990_a_at	33	Myo1b	myosin IB	---	0016459 // myosin complex // inferred from electronic annotation	0000166 // nucleotide binding // inferred from electronic annotation /// 0003774 // motor activity // inferred from electronic annotation /// 0003779 // actin binding // inferred from electronic annotation /// 0005516 // calmodulin binding // inferred from electronic annotation /// 0005524 // ATP binding // inferred from electronic annotation	---	gb:AI255256 /DB_XREF=gi:3862781 /DB_XREF=ui89g08.x1 /CLONE=IMAGE:1889630 /FEA=FLmRNA /CNT=120 /TID=Mm.3390.1 /TIER=Stack /STK=34 /UG=Mm.3390 /LL=17912 /UG_GENE=Myo1b /UG_TITLE=myosin Ib /FL=gb:NM_010863.1 gb:L00923.1	0.12841	0.083381	0.60555	0.68291	0.85717	0.18198	0.33313	0.013826	0.28155	0.18143	0.19282
1448785_at	34	Runx1t1	runt-related transcription factor 1; translocated to, 1 (cyclin D-related)	0006350 // transcription // inferred from electronic annotation /// 0006355 // regulation of transcription, DNA-dependent // inferred from direct assay /// 0006355 // regulation of transcription, DNA-dependent // inferred from electronic annotation /// 0045444 // fat cell differentiation // inferred from direct assay /// 0045449 // regulation of transcription // inferred from electronic annotatio…	0005634 // nucleus // inferred from direct assay /// 0005634 // nucleus // inferred from electronic annotation	0003677 // DNA binding // inferred from direct assay /// 0003677 // DNA binding // inferred from electronic annotation /// 0003700 // transcription factor activity // inferred from electronic annotation /// 0005515 // protein binding // inferred from physical interaction /// 0005515 // protein binding // inferred from electronic annotation /// 0008270 // zinc ion binding // inferred from electron…	---	gb:NM_009822.1 /DB_XREF=gi:6753299 /GEN=Cbfa2t1h /FEA=FLmRNA /CNT=111 /TID=Mm.4909.1 /TIER=FL+Stack /STK=40 /UG=Mm.4909 /LL=12395 /DEF=Mus musculus CBFA2T1 identified gene homolog (human) (Cbfa2t1h), mRNA. /PROD=CBFA2T1 identified gene homolog (human) /FL=gb:NM_009822.1 gb:D32007.1	0.73826	0.37866	0.73176	0.91857	0.85746	0.43859	0.57392	0.35847	0.36775	0.2336	-0.052925
1448269_a_at	35	Klhl13	kelch-like 13 (Drosophila)	0019941 // modification-dependent protein catabolic process // inferred from electronic annotation	---	0005515 // protein binding // inferred from electronic annotation	---	gb:NM_026167.1 /DB_XREF=gi:13385673 /GEN=1200009K10Rik /FEA=FLmRNA /CNT=144 /TID=Mm.26546.1 /TIER=FL+Stack /STK=108 /UG=Mm.26546 /LL=67455 /DEF=Mus musculus RIKEN cDNA 1200009K10 gene (1200009K10Rik), mRNA. /PROD=RIKEN cDNA 1200009K10 /FL=gb:NM_026167.1	0.6023	0.60783	0.96671	1.3275	1.5185	0.040969	-0.0085543	-0.012824	0.1405	0.61539	0.34667
1445613_at	36	Nr2c2	Nuclear receptor subfamily 2, group C, member 2	0006350 // transcription // inferred from electronic annotation /// 0006355 // regulation of transcription, DNA-dependent // inferred from electronic annotation /// 0007283 // spermatogenesis // inferred from mutant phenotype /// 0007283 // spermatogenesis // traceable author statement /// 0045449 // regulation of transcription // inferred from electronic annotation /// 0048137 // spermatocyte di…	0005634 // nucleus // inferred from electronic annotation /// 0005739 // mitochondrion // inferred from direct assay /// 0005739 // mitochondrion // inferred from electronic annotation /// 0005840 // ribosome // inferred from electronic annotation /// 0030529 // ribonucleoprotein complex // inferred from electronic annotation	0003677 // DNA binding // inferred from electronic annotation /// 0003700 // transcription factor activity // inferred from electronic annotation /// 0003707 // steroid hormone receptor activity // inferred from electronic annotation /// 0004872 // receptor activity // inferred from electronic annotation /// 0004879 // ligand-dependent nuclear receptor activity // inferred from electronic annotat…	Nuclear_Receptors // GenMAPP	gb:AI592978 /DB_XREF=gi:4602026 /DB_XREF=vu96f11.x1 /CLONE=IMAGE:1210029 /FEA=EST /CNT=3 /TID=Mm.138059.1 /TIER=ConsEnd /STK=2 /UG=Mm.138059 /UG_TITLE=ESTs	-0.27277	-0.36594	-0.36807	-0.40109	-0.56703	-0.51467	-0.68831	-0.35051	0.31896	-0.043301	-0.065257
1444973_at	37	---	---	---	---	---	---	gb:AW557920 /DB_XREF=gi:7203349 /DB_XREF=L0288C08-3 /CLONE=L0288C08 /FEA=EST /CNT=3 /TID=Mm.182850.1 /TIER=ConsEnd /STK=2 /UG=Mm.182850 /UG_TITLE=ESTs	0.67233	0.53844	1.0055	1.3757	1.2887	0.062422	0.17617	0.070944	0.74557	0.33962	-0.088166
1444749_at	38	---	---	---	---	---	---	gb:BB427399 /DB_XREF=gi:16423807 /DB_XREF=BB427399 /CLONE=C630010M09 /FEA=EST /CNT=4 /TID=Mm.209114.1 /TIER=ConsEnd /STK=2 /UG=Mm.209114 /UG_TITLE=ESTs	0.19146	0.24492	0.63559	0.83639	0.54559	0.55635	0.62379	0.32295	0.47987	0.35906	0.35085
1444615_x_at	39	Runx1t1	runt-related transcription factor 1; translocated to, 1 (cyclin D-related)	0006350 // transcription // inferred from electronic annotation /// 0006355 // regulation of transcription, DNA-dependent // inferred from direct assay /// 0006355 // regulation of transcription, DNA-dependent // inferred from electronic annotation /// 0045444 // fat cell differentiation // inferred from direct assay /// 0045449 // regulation of transcription // inferred from electronic annotatio…	0005634 // nucleus // inferred from direct assay /// 0005634 // nucleus // inferred from electronic annotation	0003677 // DNA binding // inferred from direct assay /// 0003677 // DNA binding // inferred from electronic annotation /// 0003700 // transcription factor activity // inferred from electronic annotation /// 0005515 // protein binding // inferred from physical interaction /// 0005515 // protein binding // inferred from electronic annotation /// 0008270 // zinc ion binding // inferred from electron…	---	gb:AV327778 /DB_XREF=gi:6367830 /DB_XREF=AV327778 /CLONE=6330436I19 /FEA=EST /CNT=4 /TID=Mm.181211.1 /TIER=ConsEnd /STK=2 /UG=Mm.181211 /UG_TITLE=ESTs	0.98328	0.67912	0.72939	1.0663	1.027	0.45527	0.54765	0.13918	0.10858	0.13267	-0.037663
1442073_at	40	Inpp1	inositol polyphosphate-1-phosphatase	---	---	0000287 // magnesium ion binding // inferred from electronic annotation /// 0004437 // inositol or phosphatidylinositol phosphatase activity // inferred from electronic annotation /// 0004441 // inositol-1,4-bisphosphate 1-phosphatase activity // inferred from electronic annotation /// 0016787 // hydrolase activity // inferred from electronic annotation /// 0031403 // lithium ion binding // infer…	---	gb:BQ266693 /DB_XREF=gi:20491758 /DB_XREF=NISC_ff14e05.x1 /CLONE=IMAGE:2865873 /FEA=EST /CNT=8 /TID=Mm.37417.1 /TIER=ConsEnd /STK=3 /UG=Mm.37417 /UG_TITLE=ESTs	0.38712	0.47286	0.54194	0.8032	0.80424	-0.49973	-0.48435	-0.39553	0.45693	0.25271	-0.091241
1441746_at	41	---	---	---	---	---	---	gb:BM115624 /DB_XREF=gi:17078642 /DB_XREF=L0823B02-3 /CLONE=L0823B02 /FEA=EST /CNT=4 /TID=Mm.213311.1 /TIER=ConsEnd /STK=4 /UG=Mm.213311 /UG_TITLE=ESTs	0.020858	-0.45484	0.51881	0.7453	0.76627	-0.51987	-0.21297	-0.54419	0.086042	0.50889	-0.037046
1441693_at	42	Adamts3	a disintegrin-like and metallopeptidase (reprolysin type) with thrombospondin type 1 motif, 3	0006508 // proteolysis // inferred from electronic annotation /// 0007229 // integrin-mediated signaling pathway // inferred from electronic annotation /// 0051605 // protein maturation by peptide bond cleavage // inferred from genetic interaction	0005578 // proteinaceous extracellular matrix // inferred from electronic annotation /// 0031012 // extracellular matrix // inferred from electronic annotation	0004222 // metalloendopeptidase activity // inferred from electronic annotation /// 0008233 // peptidase activity // inferred from genetic interaction /// 0008233 // peptidase activity // inferred from electronic annotation /// 0008237 // metallopeptidase activity // inferred from electronic annotation /// 0008270 // zinc ion binding // inferred from electronic annotation	---	gb:BB193360 /DB_XREF=gi:16270831 /DB_XREF=BB193360 /CLONE=A330076N17 /FEA=EST /CNT=4 /TID=Mm.133062.1 /TIER=ConsEnd /STK=4 /UG=Mm.133062 /UG_TITLE=ESTs, Moderately similar to ATS3_HUMAN ADAM-TS 3 PRECURSOR (H.sapiens)	0.97384	0.56457	0.53335	1.2013	1.0024	0.065633	0.23947	-0.013412	0.33575	0.4229	0.43672
1441212_at	43	Fam92a	family with sequence similarity 92, member A	---	---	0005515 // protein binding // inferred from physical interaction	---	gb:AV350862 /DB_XREF=gi:15406686 /DB_XREF=AV350862 /CLONE=6530443I23 /FEA=EST /CNT=5 /TID=Mm.133498.1 /TIER=ConsEnd /STK=4 /UG=Mm.133498 /UG_TITLE=ESTs	0.42327	0.20862	0.53217	0.96866	0.80684	0.16686	0.17412	-0.068439	0.22482	0.038049	0.29232
1440096_at	44	Ecm2	extracellular matrix protein 2, female organ and adipocyte specific	0010811 // positive regulation of cell-substrate adhesion // inferred from direct assay /// 0030198 // extracellular matrix organization // inferred from direct assay	0005576 // extracellular region // inferred from electronic annotation /// 0005578 // proteinaceous extracellular matrix // inferred from electronic annotation /// 0005614 // interstitial matrix // inferred from direct assay /// 0031012 // extracellular matrix // inferred from direct assay	0005515 // protein binding // inferred from electronic annotation /// 0005518 // collagen binding // inferred from direct assay /// 0008201 // heparin binding // inferred from direct assay /// 0070052 // collagen V binding // inferred from direct assay	---	gb:BB005258 /DB_XREF=gi:16214892 /DB_XREF=BB005258 /CLONE=4732465J06 /FEA=EST /CNT=6 /TID=Mm.106335.1 /TIER=ConsEnd /STK=6 /UG=Mm.106335 /UG_TITLE=ESTs	0.29507	0.67151	0.72211	0.88727	1.1326	0.083866	0.10019	0.041992	0.44245	0.31151	0.19019
1440026_at	45	---	---	---	---	---	---	gb:BM120634 /DB_XREF=gi:17088660 /DB_XREF=L0942B12-3 /CLONE=L0942B12 /FEA=EST /CNT=6 /TID=Mm.214553.1 /TIER=ConsEnd /STK=6 /UG=Mm.214553 /UG_TITLE=ESTs	0.57972	0.60169	0.79857	1.2058	1.0778	0.16501	0.1961	0.21727	0.48735	0.31005	-0.048276
1440011_at	46	---	---	---	---	---	---	gb:AV228877 /DB_XREF=gi:15404926 /DB_XREF=AV228877 /CLONE=4631402K01 /FEA=EST /CNT=6 /TID=Mm.208578.1 /TIER=ConsEnd /STK=6 /UG=Mm.208578 /UG_TITLE=ESTs, Weakly similar to 2022314A granule cell marker protein (M.musculus)	0.099956	0.26704	0.54478	0.93065	0.97293	-0.059926	0.083933	-0.073939	0.20703	0.13559	-0.089831
1436915_x_at	47	Laptm4b	lysosomal-associated protein transmembrane 4B	0006810 // transport // inferred from electronic annotation	0012505 // endomembrane system // inferred from electronic annotation /// 0016020 // membrane // inferred from electronic annotation /// 0016021 // integral to membrane // inferred from electronic annotation	---	---	gb:AU024771 /DB_XREF=gi:3395118 /DB_XREF=AU024771 /CLONE=J0460D05 /FEA=EST /CNT=37 /TID=Mm.197518.2 /TIER=Stack /STK=36 /UG=Mm.197518 /LL=114128 /UG_GENE=Laptm4b /UG_TITLE=lysosomal-associated protein transmembrane 4B	0.54907	0.58393	0.55442	0.83228	0.76685	-0.24735	-0.23942	-0.14952	0.58259	0.24148	0.084364
1436833_x_at	48	Ttll1	tubulin tyrosine ligase-like 1	0006464 // protein modification process // inferred from electronic annotation	0005737 // cytoplasm // inferred from electronic annotation /// 0005856 // cytoskeleton // inferred from electronic annotation /// 0005874 // microtubule // inferred from electronic annotation	0004835 // tubulin-tyrosine ligase activity // inferred from electronic annotation /// 0016874 // ligase activity // inferred from electronic annotation	---	gb:BB251824 /DB_XREF=gi:8944570 /DB_XREF=BB251824 /CLONE=A730048E02 /FEA=EST /CNT=46 /TID=Mm.74226.2 /TIER=Stack /STK=46 /UG=Mm.74226 /UG_TITLE=Mus musculus, Similar to tubulin tyrosine ligase-like 1, clone MGC:19055 IMAGE:4191464, mRNA, complete cds	0.16252	0.11702	0.71236	1.0196	0.78056	0.047641	0.24301	-0.12275	0.5119	0.23602	-0.10558
1435990_at	49	Adamts2	a disintegrin-like and metallopeptidase (reprolysin type) with thrombospondin type 1 motif, 2	0006508 // proteolysis // inferred from electronic annotation /// 0007229 // integrin-mediated signaling pathway // inferred from electronic annotation /// 0007283 // spermatogenesis // inferred from mutant phenotype /// 0030199 // collagen fibril organization // inferred from mutant phenotype /// 0030324 // lung development // inferred from mutant phenotype /// 0030574 // collagen catabolic proc…	0005576 // extracellular region // inferred from electronic annotation /// 0005578 // proteinaceous extracellular matrix // inferred from electronic annotation /// 0031012 // extracellular matrix // inferred from direct assay /// 0031012 // extracellular matrix // inferred from electronic annotation	0004222 // metalloendopeptidase activity // inferred from electronic annotation /// 0008233 // peptidase activity // inferred from direct assay /// 0008233 // peptidase activity // inferred from electronic annotation /// 0008237 // metallopeptidase activity // inferred from electronic annotation /// 0008270 // zinc ion binding // inferred from electronic annotation /// 0016787 // hydrolase activi…	---	gb:BG073461 /DB_XREF=gi:12556030 /DB_XREF=H3122H02-3 /CLONE=H3122H02 /FEA=EST /CNT=17 /TID=Mm.23038.1 /TIER=Stack /STK=12 /UG=Mm.23038 /UG_TITLE=ESTs	0.37431	0.66074	0.80062	0.97984	1.0747	0.37973	0.3875	0.026108	0.86364	0.48022	0.42704
1434740_at	50	Scarf2	scavenger receptor class F, member 2	0007155 // cell adhesion // inferred from electronic annotation /// 0007157 // heterophilic cell adhesion // inferred from direct assay	0016020 // membrane // inferred from electronic annotation /// 0016021 // integral to membrane // inferred from electronic annotation	0004872 // receptor activity // inferred from electronic annotation /// 0005044 // scavenger receptor activity // inferred from direct assay /// 0005515 // protein binding // inferred from electronic annotation	---	gb:BB484759 /DB_XREF=gi:16441196 /DB_XREF=BB484759 /CLONE=D430027G05 /FEA=EST /CNT=28 /TID=Mm.33775.1 /TIER=Stack /STK=26 /UG=Mm.33775 /LL=106157 /UG_GENE=AI194363 /UG_TITLE=expressed sequence AI194363	0.34719	0.72354	0.52285	0.58613	0.82901	0.42272	0.24191	0.14977	0.35779	0.37317	0.43929
1433481_at	51	Fkbp14	FK506 binding protein 14	0006457 // protein folding // inferred from electronic annotation	0005783 // endoplasmic reticulum // inferred from electronic annotation /// 0005788 // endoplasmic reticulum lumen // inferred from electronic annotation	0003755 // peptidyl-prolyl cis-trans isomerase activity // inferred from electronic annotation /// 0005509 // calcium ion binding // inferred from electronic annotation /// 0016853 // isomerase activity // inferred from electronic annotation	---	gb:BB027759 /DB_XREF=gi:15403514 /DB_XREF=BB027759 /CLONE=5330438O07 /FEA=EST /CNT=161 /TID=Mm.64032.1 /TIER=Stack /STK=141 /UG=Mm.64032 /UG_TITLE=ESTs, Weakly similar to FK506 binding protein 7 (23 kDa) (Mus musculus) (M.musculus)	0.59879	0.6785	0.70206	1.1919	1.1485	0.11327	0.17295	-0.025079	0.50924	0.44109	0.38815
1431475_a_at	52	Hoxa10	homeo box A10	0001501 // skeletal system development // inferred from genetic interaction /// 0006350 // transcription // inferred from electronic annotation /// 0006355 // regulation of transcription, DNA-dependent // inferred from electronic annotation /// 0007275 // multicellular organismal development // inferred from direct assay /// 0007275 // multicellular organismal development // inferred from electro…	0005634 // nucleus // inferred from electronic annotation /// 0005667 // transcription factor complex // inferred from direct assay	0003677 // DNA binding // traceable author statement /// 0003677 // DNA binding // inferred from electronic annotation /// 0003700 // transcription factor activity // inferred from electronic annotation /// 0005515 // protein binding // inferred from physical interaction /// 0030528 // transcription regulator activity // inferred from electronic annotation /// 0043565 // sequence-specific DNA bin…	---	gb:AK002670.1 /DB_XREF=gi:12832825 /FEA=mRNA /CNT=3 /TID=Mm.5.2 /TIER=ConsEnd /STK=2 /UG=Mm.5 /LL=15395 /UG_GENE=Hoxa10 /UG_TITLE=homeo box A10 /DEF=Mus musculus adult male kidney cDNA, RIKEN full-length enriched library, clone:0610025N02:homeo box A10, full insert sequence.	0.58683	0.54329	0.59464	0.85493	0.8571	-0.12164	-0.25098	-0.13389	0.30349	0.37987	0.31143
1431057_a_at	53	Prss23	protease, serine, 23	0006508 // proteolysis // inferred from electronic annotation	0005576 // extracellular region // inferred from electronic annotation /// 0005634 // nucleus // inferred from electronic annotation	0003824 // catalytic activity // inferred from electronic annotation /// 0004252 // serine-type endopeptidase activity // inferred from electronic annotation /// 0008233 // peptidase activity // inferred from electronic annotation /// 0008236 // serine-type peptidase activity // inferred from electronic annotation /// 0016787 // hydrolase activity // inferred from electronic annotation	---	gb:AK009847.1 /DB_XREF=gi:12844895 /FEA=mRNA /CNT=12 /TID=Mm.22345.3 /TIER=ConsEnd /STK=0 /UG=Mm.22345 /LL=76453 /UG_GENE=2310046G15Rik /UG_TITLE=RIKEN cDNA 2310046G15 gene /DEF=Mus musculus adult male tongue cDNA, RIKEN full-length enriched library, clone:2310046G15:homolog to SERINE PROTEASE (HYPOTHETICAL 43.0 KDA PROTEIN) (PROTEASE, SERINE, 23), full insert sequence.	0.65086	0.5886	1.0855	1.4404	1.556	-0.090159	-0.063198	0.31118	0.6971	0.48073	0.12911
1429280_at	54	Col22a1	collagen, type XXII, alpha 1	---	---	---	---	gb:AK010095.1 /DB_XREF=gi:12845301 /FEA=mRNA /CNT=15 /TID=Mm.24301.1 /TIER=Stack /STK=8 /UG=Mm.24301 /LL=69700 /UG_GENE=2310067L16Rik /UG_TITLE=RIKEN cDNA 2310067L16 gene /DEF=Mus musculus adult male tongue cDNA, RIKEN full-length enriched library, clone:2310067L16:related to COLLAGEN ALPHA 1(IX) CHAIN PRECURSOR (FRAGMENT), full insert sequence.	-0.05398	-0.052085	0.83108	0.99257	0.51001	0.12669	0.24725	0.038028	0.56333	0.49187	0.33338
1428914_at	55	2310014D11Rik	RIKEN cDNA 2310014D11 gene	---	---	---	---	gb:AK009333.1 /DB_XREF=gi:12844068 /FEA=mRNA /CNT=38 /TID=Mm.29777.1 /TIER=Stack /STK=17 /UG=Mm.29777 /LL=69633 /UG_GENE=2310014D11Rik /UG_TITLE=RIKEN cDNA 2310014D11 gene /DEF=Mus musculus adult male tongue cDNA, RIKEN full-length enriched library, clone:2310014D11:hypothetical protein, full insert sequence.	0.23777	0.37954	0.63483	0.74958	1.0441	0.048525	0.17928	0.078827	0.32519	0.48317	0.26824
1428895_at	56	Rftn2	raftlin family member 2	---	0005886 // plasma membrane // inferred from electronic annotation /// 0016020 // membrane // inferred from electronic annotation /// 0031225 // anchored to membrane // inferred from electronic annotation	---	---	gb:AK014318.1 /DB_XREF=gi:12852087 /FEA=mRNA /CNT=58 /TID=Mm.40776.2 /TIER=Stack /STK=18 /UG=Mm.40776 /LL=74013 /UG_GENE=3222401M22Rik /UG_TITLE=RIKEN cDNA 3222401M22 gene /DEF=Mus musculus 14, 17 days embryo head cDNA, RIKEN full-length enriched library, clone:3222401M22:homolog to HYPOTHETICAL PROTEIN KIAA0084 (HA2022) (FRAGMENT), full insert sequence.	0.16959	0.35118	0.54713	0.62887	0.85334	0.10103	0.14625	-0.12061	0.29627	0.37946	0.26514
1427831_s_at	57	Zfp260	zinc finger protein 260	0006350 // transcription // inferred from electronic annotation /// 0007275 // multicellular organismal development // inferred from electronic annotation /// 0045449 // regulation of transcription // inferred from electronic annotation	0005622 // intracellular // inferred from electronic annotation /// 0005634 // nucleus // inferred from electronic annotation	0003676 // nucleic acid binding // inferred from electronic annotation /// 0003677 // DNA binding // inferred from electronic annotation /// 0008270 // zinc ion binding // inferred from electronic annotation /// 0046872 // metal ion binding // inferred from electronic annotation	---	gb:L36316.1 /DB_XREF=gi:538414 /GEN=Zfp /FEA=mRNA /CNT=1 /TID=Mm.195092.1 /TIER=ConsEnd /STK=0 /UG=Mm.195092 /LL=22721 /DEF=Mus musculus (clone PMLZ2) zinc finger protein (Zfp) mRNA, 3 end of cds. /PROD=zinc finger protein	0.32338	0.32127	0.50766	0.9307	1.085	-0.22849	0.15721	0.12733	0.21665	0.18238	0.36924
1427411_s_at	58	Dleu2	deleted in lymphocytic leukemia, 2	---	---	---	---	gb:BB812902 /DB_XREF=gi:16985531 /DB_XREF=BB812902 /CLONE=G730016M10 /FEA=mRNA /CNT=21 /TID=Mm.25679.1 /TIER=ConsEnd /STK=1 /UG=Mm.25679 /LL=84093 /UG_GENE=Dleu2 /UG_TITLE=deleted in lymphocytic leukemia, 2	-0.09516	0.08793	0.12526	0.54362	0.63479	-0.512	-0.34744	-0.057287	-0.12026	0.094353	-0.007285
1427391_a_at	59	Col12a1	collagen, type XII, alpha 1	0007155 // cell adhesion // inferred from electronic annotation	0005576 // extracellular region // inferred from electronic annotation /// 0005578 // proteinaceous extracellular matrix // inferred from electronic annotation /// 0005595 // collagen type XII // inferred from electronic annotation	0005198 // structural molecule activity // inferred from electronic annotation /// 0005515 // protein binding // inferred from electronic annotation	Electron_Transport_Chain // GenMAPP	gb:AW412729 /DB_XREF=gi:6938645 /DB_XREF=uq45h12.x1 /CLONE=IMAGE:2812391 /FEA=mRNA /CNT=20 /TID=Mm.3819.2 /TIER=ConsEnd /STK=2 /UG=Mm.3819 /LL=12816 /UG_GENE=Col12a1 /UG_TITLE=procollagen, type XII, alpha 1	-0.030543	0.84863	0.59314	0.66162	1.0996	-0.10461	0.27811	0.15144	0.24255	0.42984	0.26253
1425476_at	60	Col4a5	collagen, type IV, alpha 5	---	0005581 // collagen // inferred from electronic annotation /// 0005587 // collagen type IV // inferred from direct assay /// 0005604 // basement membrane // inferred from direct assay	0005201 // extracellular matrix structural constituent // inferred from electronic annotation /// 0005488 // binding // inferred from electronic annotation	---	gb:BM250666 /DB_XREF=gi:17885936 /DB_XREF=K0853D09-3 /CLONE=K0853D09 /FEA=FLmRNA /CNT=117 /TID=Mm.155579.1 /TIER=Stack /STK=58 /UG=Mm.155579 /LL=12830 /UG_GENE=Col4a5 /UG_TITLE=procollagen, type IV, alpha 5 /FL=gb:AB041350.1	-0.49486	-0.40053	-0.10835	-0.16467	0.014046	-0.68838	-0.63608	-0.5811	-0.30396	0.14236	-0.13676
1425185_at	61	Pppde1	PPPDE peptidase domain containing 1	---	---	---	---	gb:BB245100 /DB_XREF=gi:16355367 /DB_XREF=BB245100 /CLONE=A730007C13 /FEA=FLmRNA /CNT=90 /TID=Mm.26611.1 /TIER=Stack /STK=28 /UG=Mm.26611 /LL=78825 /UG_GENE=5830417C01Rik /UG_TITLE=RIKEN cDNA 5830417C01 gene /FL=gb:BC002200.1	0.35234	0.39873	0.51514	0.82973	0.66284	-0.063732	0.029045	-0.061399	0.35306	0.16108	-0.006609
1423915_at	62	Olfml2b	olfactomedin-like 2B	0030198 // extracellular matrix organization // inferred from direct assay	0005576 // extracellular region // inferred from electronic annotation /// 0016020 // membrane // inferred from electronic annotation /// 0031012 // extracellular matrix // inferred from direct assay	0042803 // protein homodimerization activity // inferred from physical interaction /// 0050840 // extracellular matrix binding // inferred from direct assay	---	gb:BC025654.1 /DB_XREF=gi:19343912 /FEA=FLmRNA /CNT=105 /TID=Mm.25602.1 /TIER=FL+Stack /STK=80 /UG=Mm.25602 /DEF=Mus musculus, Similar to DKFZP586L151 protein, clone MGC:38296 IMAGE:5342879, mRNA, complete cds. /PROD=Similar to DKFZP586L151 protein /FL=gb:BC025654.1	0.25708	0.50883	0.56887	0.83334	0.77269	0.062399	0.070509	0.12464	0.4174	0.20979	0.092273
1422831_at	63	Fbn2	fibrillin 2	0030326 // embryonic limb morphogenesis // inferred from mutant phenotype /// 0035108 // limb morphogenesis // inferred from mutant phenotype	0001527 // microfibril // traceable author statement /// 0005576 // extracellular region // traceable author statement /// 0005576 // extracellular region // inferred from electronic annotation /// 0005578 // proteinaceous extracellular matrix // inferred from electronic annotation	0005201 // extracellular matrix structural constituent // inferred from electronic annotation /// 0005488 // binding // inferred from electronic annotation /// 0005509 // calcium ion binding // traceable author statement /// 0005509 // calcium ion binding // inferred from electronic annotation	---	gb:NM_010181.1 /DB_XREF=gi:6753825 /GEN=Fbn2 /FEA=FLmRNA /CNT=40 /TID=Mm.20271.1 /TIER=FL+Stack /STK=10 /UG=Mm.20271 /LL=14119 /DEF=Mus musculus fibrillin 2 (Fbn2), mRNA. /PROD=fibrillin 2 /FL=gb:NM_010181.1	1.3061	1.2937	0.8198	1.3094	1.5221	-0.10482	-0.15575	-0.016919	0.14832	0.22612	0.16544
1419401_at	64	Asb13	ankyrin repeat and SOCS box-containing 13	0007242 // intracellular signaling cascade // inferred from electronic annotation /// 0019941 // modification-dependent protein catabolic process // inferred from electronic annotation	---	0005515 // protein binding // inferred from electronic annotation	---	gb:NM_080857.1 /DB_XREF=gi:18252801 /GEN=Asb13 /FEA=FLmRNA /CNT=29 /TID=Mm.21523.1 /TIER=FL+Stack /STK=10 /UG=Mm.21523 /LL=142688 /DEF=Mus musculus ankyrin repeat domain-containing SOCS box protein 13 (Asb13), mRNA. /PROD=ankyrin repeat domain-containing SOCS boxprotein 13 /FL=gb:NM_080857.1 gb:AF403041.1 gb:BC018240.1	0.49918	-0.023018	0.79802	0.94207	0.72969	-0.3111	-0.20827	-0.25241	0.29038	0.36914	-0.26229
1417355_at	65	Peg3	paternally expressed 3	0006915 // apoptosis // inferred from electronic annotation	0005622 // intracellular // inferred from electronic annotation /// 0005634 // nucleus // inferred from electronic annotation /// 0005737 // cytoplasm // inferred from electronic annotation	0003676 // nucleic acid binding // inferred from electronic annotation /// 0008270 // zinc ion binding // inferred from electronic annotation /// 0046872 // metal ion binding // inferred from electronic annotation	---	gb:AB003040.1 /DB_XREF=gi:18958238 /GEN=Peg3 /FEA=FLmRNA /CNT=138 /TID=Mm.7952.1 /TIER=FL+Stack /STK=47 /UG=Mm.7952 /LL=18616 /DEF=Mus musculus Peg3 mRNA for zinc finger protein, complete cds. /PROD=zinc finger protein /FL=gb:AB003040.1 gb:AF038939.1 gb:NM_008817.1	0.25476	0.34976	0.20703	0.56573	0.95951	-0.59439	-0.36263	-0.22226	0.19911	0.099667	-0.19838
1416431_at	66	Tubb6	tubulin, beta 6	0007017 // microtubule-based process // inferred from electronic annotation /// 0007018 // microtubule-based movement // inferred from electronic annotation /// 0051258 // protein polymerization // inferred from electronic annotation	0005874 // microtubule // inferred from electronic annotation /// 0043234 // protein complex // inferred from electronic annotation	0000166 // nucleotide binding // inferred from electronic annotation /// 0003924 // GTPase activity // inferred from electronic annotation /// 0005198 // structural molecule activity // inferred from electronic annotation /// 0005525 // GTP binding // inferred from electronic annotation	---	gb:NM_026473.1 /DB_XREF=gi:13385963 /GEN=2310057H16Rik /FEA=FLmRNA /CNT=173 /TID=Mm.181860.1 /TIER=FL+Stack /STK=90 /UG=Mm.181860 /LL=67951 /DEF=Mus musculus RIKEN cDNA 2310057H16 gene (2310057H16Rik), mRNA. /PROD=RIKEN cDNA 2310057H16 /FL=gb:NM_026473.1 gb:BC008225.1	0.61271	0.42093	0.53104	1.118	0.73058	0.032493	0.03432	0.084372	0.3926	0.049529	0.20868

## Sheet: Cluster 1 DAVID
Annotation Cluster 1	Enrichment Score: 1.748564783472698							Annotation Cluster 1	Enrichment Score: 1.7835330654476407
Category	Term	Count	PValue	Genes	Bonferroni	Benjamini		Category	Term	Count	PValue	Genes	Bonferroni	Benjamini
[truncated: 13 more rows]

## Sheet: Cluster 2 DAVID
Annotation Cluster 1	Enrichment Score: 2.9625820683443873
[truncated: 29 more rows]

[truncated: 14 more sheets: Cluster 3 DAVID, Cluster 4 DAVID, Cluster 5 DAVID, Cluster 6 DAVID, Cluster 7 DAVID, Cluster 8 DAVID, Cluster 9 DAVID, Cluster 10 DAVID, Cluster 11 DAVID, Cluster 12 DAVID, Cluster 13 DAVID, Cluster 14 DAVID, Cluster 15 DAVID, CLuster 16 DAVID]
