# Supplementary material for: Disease Progression and Phasic Changes in Gene Expression in a Mouse Model of Osteoarthritis
Source: PLoS One. 2013 Jan 28;8(1):e54633. doi: 10.1371/journal.pone.0054633 (PMC3557277; doi:10.1371/journal.pone.0054633)
Supplement: File S3 — Excel file of 97 common probe sets and DAVID results. (XLSX) [file pone.0054633.s005.xlsx]

## Sheet: 97 gene details
Probe Set ID	Consensus Cluster#	Gene Symbol	Gene Title	2wk SLR Sham rep1	2wk SLR Sham rep2	2wk SLR Sham rep3	4wk SLR Sham rep1	4wk SLR Sham rep2	4wk SLR Sham rep3	8wk SLR Sham rep1	8wk SLR Sham rep2	8wk SLR Sham rep3	16wk SLR Sham rep1	16wk SLR Sham rep2	16wk SLR Sham rep3	2wk SLR DMM rep2	2wk SLR DMM rep3	4wk SLR DMM rep1	4wk SLR DMM rep2	4wk SLR DMM rep3	8wk SLR DMM rep1	8wk SLR DMM rep2	8wk SLR DMM rep3	16wk SLR DMM rep1	16wk SLR DMM rep2	16wk SLR DMM rep3
1426238_at	1	Bmp1	bone morphogenetic protein 1	0.1728	0.61053	0.78972	0.035819	-0.28632	-0.16056	-0.29455	-0.36009	-0.36209	-0.67888	-0.39202	-0.44663	0.32964	0.34834	0.51666	0.81715	0.75653	0.14393	0.24093	0.11469	0.40255	0.31973	0.2476
1433779_at	1	Casc4	cancer susceptibility candidate 4	-0.16113	0.28043	0.36497	-0.35269	-0.69458	-0.32582	-0.53118	-0.034253	-0.25165	-0.45113	-0.28134	-0.50525	0.62784	0.56357	0.80351	0.97431	1.1111	0.2008	0.18449	-0.030403	0.29821	0.28487	-0.030454
1417599_at	1	Cd276	CD276 antigen	0.085841	0.61069	0.7345	0.030876	-0.5623	-0.13727	-0.25255	-0.33604	-0.3589	-0.52016	-0.17214	-0.57872	0.5798	0.44274	0.57007	0.897	0.94163	0.28442	0.15377	-0.030024	0.37995	0.23831	0.081511
1418455_at	1	Copz2	coatomer protein complex, subunit zeta 2	0.013746	0.25698	0.5249	-0.18894	-0.65647	-0.26927	-0.47713	-0.41404	-0.26698	-0.93875	-0.45475	-0.74363	0.29929	0.54255	0.50039	0.88594	0.90823	-0.1109	0.089633	-0.081168	0.4282	0.33115	0.33921
1448648_at	1	Fam114a1	family with sequence similarity 114, member A1	-0.13124	0.31856	0.43628	-0.32646	-0.69113	-0.20221	-0.67742	-0.20321	-0.19741	-0.79446	-0.38257	-0.6229	0.55489	0.62598	0.58906	0.98543	1.0482	-0.095931	0.1495	0.058243	0.38631	0.25966	0.093644
1455096_at	1	Flrt2	fibronectin leucine rich transmembrane protein 2	0.060843	0.49894	1.0675	-0.084246	-0.46114	-0.11419	-0.4897	-0.17507	-0.51184	-0.83256	-0.56446	-0.8279	0.45847	0.38569	0.67514	0.8436	0.85801	0.2088	0.25003	-0.007282	0.42783	0.34673	0.24235
1444302_at	1	Glt8d4 /// LOC100048436	glycosyltransferase 8 domain containing 4 /// similar to CDNA sequence BC049816	0.016854	0.57518	0.84567	-0.11558	-0.25865	-0.072857	-0.36003	-0.088387	-0.42532	-0.68819	-0.48464	-0.69784	0.43299	0.53755	0.55697	0.84588	1.0053	0.074877	0.10837	-0.0038128	0.32912	0.29765	0.20136
1460559_at	1	Kank2	KN motif and ankyrin repeat domains 2	-0.025928	0.21522	0.57619	-0.23502	-0.52671	-0.09933	-0.30694	-0.19116	-0.42219	-0.60746	-0.44258	-0.50808	0.40751	0.39192	0.5915	0.68947	0.72937	0.27157	0.49531	0.12387	0.38716	0.31004	0.20184
1452752_at	1	Lepre1	leprecan 1	0.022602	0.11792	0.30649	-0.37496	-0.64498	-0.28072	-0.49726	-0.32892	-0.26079	-0.6527	-0.38909	-0.67576	0.34202	0.49846	0.53163	0.91394	0.91517	-0.023038	0.14994	-0.082198	0.13128	0.24208	0.019955
1442740_at	1	Prdm5	PR domain containing 5	-0.10103	0.37614	0.79122	-0.21633	-0.62794	-0.29325	-0.40717	-0.044903	0.0017313	-0.58688	-0.33517	-0.52752	0.49956	0.40777	0.59745	0.90553	0.95563	-0.13246	0.039338	-0.20255	0.18535	0.19638	-0.0092047
1418673_at	1	Snai2	snail homolog 2 (Drosophila)	-0.14617	0.2725	0.86319	-0.48261	-0.53419	-0.21117	-0.28056	0.053721	-0.27419	-0.52691	-0.32018	-0.34395	0.36538	0.19412	0.53469	0.93064	1.0562	0.21144	0.16639	-0.01566	0.34441	0.20724	0.026591
1437065_at	1	Zbtb20	zinc finger and BTB domain containing 20	-0.30672	0.10908	0.4786	-0.48987	-0.58315	-0.14764	-0.45833	-0.017289	-0.24699	-0.64675	-0.48883	-0.56143	0.46003	0.58166	0.65466	0.86466	1.0797	0.13299	0.42692	0.047919	0.36514	0.09958	0.22992
1434264_at	2	Ank2	ankyrin 2, brain	0.17679	0.43878	0.58817	-0.37688	-0.72346	-0.10527	-0.17364	0.39624	-0.46127	-0.53974	-0.46736	-0.53533	0.35752	0.72496	0.93275	1.1348	1.1557	0.38422	0.5892	0.20221	0.64514	0.53378	0.2485
1416405_at	2	Bgn	biglycan	0.046121	0.65088	0.818	-0.13288	-0.56186	-0.19642	-0.43965	-0.23474	-0.39763	-0.63811	-0.52675	-0.5003	0.44448	0.61593	0.73233	1.1897	1.1018	0.30673	0.46737	0.21639	0.59291	0.47909	0.33321
1436029_at	2	Bicc1	bicaudal C homolog 1 (Drosophila)	0.21502	0.80967	0.94858	0.13339	-0.11096	0.19599	-0.37566	-0.041726	-0.24143	-0.63037	-0.4285	-0.35713	0.62563	0.7569	0.63654	1.0005	1.1132	0.37185	0.33018	0.20402	0.54104	0.39084	0.31686
1434957_at	2	Cdon	cell adhesion molecule-related/down-regulated by oncogenes	0.041706	0.40343	0.45329	-0.18337	-0.61539	-0.09354	-0.33161	-0.082147	-0.3373	-1.0069	-0.643	-0.54689	0.45797	0.63823	0.78634	1.2186	0.84994	0.28075	0.40234	0.19139	0.66769	0.59552	0.73974
1427986_a_at	2	Col16a1	collagen, type XVI, alpha 1	0.091105	0.90833	0.76725	-0.1101	-0.23511	-0.076226	-0.47358	-0.38988	-0.34578	-0.60759	-0.55466	-0.47778	0.62216	0.89851	0.7222	1.0705	1.1654	0.21137	0.19489	0.20705	0.48213	0.4549	0.24177
1434479_at	2	Col5a1	collagen, type V, alpha 1	0.33735	1.0479	0.9656	-0.10341	-0.49445	0.0054463	-0.58809	-0.52096	-0.52919	-0.84578	-0.61342	-0.73741	0.71704	1.1096	1.0099	1.4437	1.6434	0.30141	0.48515	0.23103	0.88244	0.59618	0.3428
1454613_at	2	Dpysl3	dihydropyrimidinase-like 3	0.068291	0.4622	0.45535	-0.30821	-0.5559	-0.22587	-0.48795	-0.28029	-0.5162	-1.0163	-0.51144	-0.67924	0.49656	0.83571	0.87472	1.1953	1.2087	0.21921	0.51626	0.31714	0.73738	0.47472	0.39862
1459749_s_at	2	Fat4	FAT tumor suppressor homolog 4 (Drosophila)	0.25125	1.146	0.75361	0.060346	-0.45367	0.16458	-0.38333	0.11761	-0.16081	-0.72986	-0.55544	-0.45177	1.0081	1.3359	0.99586	1.4462	1.6835	0.19588	0.29533	0.022355	0.68968	0.6761	0.62267
1460574_at	2	Fat4	FAT tumor suppressor homolog 4 (Drosophila)	0.045668	0.83653	0.52069	-0.06519	-0.39456	0.16656	-0.3035	-0.14032	-0.28643	-0.51287	-0.45759	-0.23799	0.85116	1.2809	0.85265	1.1421	1.2508	0.2004	0.27528	0.25253	0.38882	0.45738	0.45601
1449531_at	2	Leprel2	leprecan-like 2	-0.032442	0.55723	0.65549	-0.21232	-0.4984	-0.02576	-0.4111	-0.19212	-0.31555	-0.89364	-0.49188	-0.57424	0.7035	0.78757	0.68004	1.2441	0.9836	0.012333	0.28605	0.019328	0.58778	0.41802	0.37096
1440920_at	2	Mmp14	Matrix metallopeptidase 14 (membrane-inserted)	0.12641	0.75913	0.9989	-0.14655	-0.49688	-0.19173	-0.59543	-0.48804	-0.56367	-0.78979	-0.57506	-0.6457	0.53969	0.8748	0.86142	1.1115	1.2594	0.20509	0.24593	0.30819	0.44332	0.42951	0.20293
1431375_s_at	2	Parva	parvin, alpha	0.062309	0.50355	0.63505	-0.23505	-0.40282	-0.032483	-0.40693	-0.092257	-0.26782	-0.789	-0.4697	-0.54965	0.62662	0.61983	0.6537	1.1083	1.0774	0.22358	0.42913	0.1119	0.64055	0.39396	0.46585
1415943_at	2	Sdc1	syndecan 1	0.09239	0.68553	0.75435	-0.17612	-0.28304	0.037857	-0.37443	-0.32054	-0.50638	-0.68124	-0.50574	-0.36081	0.73284	0.59427	0.78021	1.4311	1.0597	0.33965	0.48939	0.1229	0.48324	0.32669	0.41541
1434089_at	2	Synpo	synaptopodin	0.14546	0.53236	0.5887	-0.12352	-0.43991	-0.089232	-0.25387	-0.16745	-0.38326	-0.50979	-0.4778	-0.3918	0.60172	0.56004	0.85597	1.1785	0.961	0.25858	0.59506	0.16782	0.80817	0.40222	0.49776
1420924_at	2	Timp2	tissue inhibitor of metalloproteinase 2	0.11186	0.75506	0.70759	-0.41791	-0.64981	-0.075335	-0.25777	-0.33764	-0.64631	-0.82966	-0.45392	-0.41068	0.49701	1.2935	1.1479	1.3216	1.2133	0.21801	0.6529	0.43219	0.50425	0.34239	0.4146
1451332_at	2	Zfp521	zinc finger protein 521	0.20571	0.91228	0.82495	0.050998	-0.18541	0.24064	-0.33623	0.042991	-0.25516	-0.72576	-0.51508	-0.49017	0.64439	1.1268	0.7791	1.2728	1.3385	0.30137	0.4609	0.21211	0.80693	0.56596	0.63081
1427195_at	3	---	---	-0.27211	-0.30985	0.18854	-0.51163	-0.99699	-0.62107	-0.53114	-0.32358	-0.2944	-0.70386	-0.61721	-0.62935	0.31093	0.05811	0.74512	0.65191	0.86782	-0.053626	0.086483	-0.025878	0.40012	0.31794	-0.12273
1429637_at	3	1110032E23Rik	RIKEN cDNA 1110032E23 gene	-0.18256	0.15264	0.6918	-0.42302	-0.47061	-0.60371	-0.62426	-0.16576	-0.28504	-0.81057	-0.73908	-0.77451	-0.053118	0.17919	0.67056	0.62228	0.88784	-0.21982	-0.32189	-0.19953	0.47386	0.31559	0.34002
1435985_at	3	Farp2	FERM, RhoGEF and pleckstrin domain protein 2	-0.11783	0.24227	0.67619	-0.21677	-0.5253	-0.37297	-0.64161	-0.40609	-0.26666	-0.98902	-0.42466	-0.92767	0.36484	0.25075	0.51083	0.63938	0.80158	-0.059864	-0.037387	-0.084181	0.3962	0.37057	0.16208
1422868_s_at	3	Gda	guanine deaminase	-0.39801	-0.53337	-0.073153	-0.93804	-1.1534	-0.58339	-0.32028	0.1171	0.2348	0.056781	0.068721	-0.034145	-0.030644	0.075791	0.72325	0.98581	0.59977	-0.1175	0.032722	0.097018	0.044002	-0.1915	-0.60757
1436917_s_at	3	Gpsm1	G-protein signalling modulator 1 (AGS3-like, C. elegans)	-0.048087	0.27854	0.24261	-0.20404	-0.63823	-0.35287	-0.43468	0.0062673	-0.18311	-0.51999	-0.17064	-0.50294	0.27368	0.091064	0.6016	0.66407	0.69846	-0.24754	0.032339	-0.014072	0.17105	0.15585	-0.045116
1434510_at	3	Papss2	3'-phosphoadenosine 5'-phosphosulfate synthase 2	-0.46859	-0.22788	0.40972	-0.89107	-1.0015	-0.87884	-0.88049	-0.29747	-0.30244	-0.92754	-0.8272	-0.80874	0.12887	0.1362	0.54554	0.71989	1.0018	-0.17485	-0.07625	-0.13757	0.16068	0.17648	-0.19418
1456787_at	4	---	---	-0.088722	0.36717	0.35061	-0.49421	-0.48591	0.018109	-0.52675	-0.13753	-0.20708	-0.94709	-0.58958	-0.76599	0.80204	0.44226	0.44608	1.2082	0.85098	-0.029016	-0.10229	0.052755	0.64611	0.49158	0.4842
1455160_at	4	2610203C20Rik	RIKEN cDNA 2610203C20 gene	-0.040185	0.29667	0.74812	-0.38181	-0.23609	-0.27918	-0.46295	-0.071543	-0.44485	-0.79508	-0.54609	-0.88609	0.50959	0.61224	0.44056	1.0798	0.76993	0.20773	0.073699	-0.013689	0.64305	0.4406	0.55661
1436413_at	4	Frk	fyn-related kinase	0.031981	0.4026	0.79774	-0.21541	-0.37751	0.030359	-0.27117	-0.039402	-0.030971	-0.78656	-0.53218	-0.67468	0.64318	0.43241	0.61447	1.1584	1.0725	-0.092868	0.084401	-0.29979	0.80972	0.36624	0.57116
1426782_at	4	Gpr125	G protein-coupled receptor 125	-0.18631	0.15685	0.55319	-0.40639	-0.78266	-0.40138	-0.65635	-0.37107	-0.35528	-1.1907	-0.78476	-0.854	0.48559	0.53088	0.54149	1.0753	0.8707	-0.22128	0.0824	-0.05559	0.63168	0.44041	0.42665
1416473_a_at	4	Igdcc4	immunoglobulin superfamily, DCC subclass, member 4	0.27398	0.49522	0.64396	-0.051241	-0.46778	-0.33623	-0.24063	-0.18792	-0.33337	-0.62696	-0.53084	-0.83048	0.79058	0.5351	0.67875	0.83022	1.1831	-0.050973	0.0263	-0.17358	0.70473	0.39428	0.26998
1438081_at	4	Mcc	mutated in colorectal cancers	-0.0099183	0.29228	0.3038	-0.4011	-0.78311	-0.16862	-0.4884	0.0033092	-0.1405	-0.81702	-0.55864	-0.61203	0.72554	0.49163	0.54371	1.0274	0.79398	-0.16322	0.0004125	-0.10884	0.58484	0.42811	0.29608
1454997_at	4	Msrb3	methionine sulfoxide reductase B3	0.17203	0.34987	0.64622	-0.42096	-0.6892	-0.16313	-0.071567	0.17449	-0.20558	-0.54024	-0.4128	-0.74088	0.61989	0.49175	0.87044	1.0786	1.0985	-0.19528	0.011057	-0.27349	0.77986	0.45308	0.16604
1448933_at	4	Pcdhb17	protocadherin beta 17	0.15378	0.73381	0.63728	0.090162	-0.37328	0.1338	-0.35271	0.12056	-0.28185	-0.72512	-0.32026	-0.49958	0.63088	0.58717	0.65305	1.1473	0.93862	0.022673	0.062442	0.057995	0.66265	0.45204	0.5472
1423771_at	4	Prkcdbp	protein kinase C, delta binding protein	0.11958	0.60456	0.69406	-0.045963	-0.30399	0.0097485	-0.2975	-0.078117	-0.32161	-0.79135	-0.44721	-0.47002	0.65543	0.77415	0.50137	0.91724	0.67575	0.088292	0.16294	0.0086873	0.51884	0.42835	0.50257
1450734_at	4	Sec16b	SEC16 homolog B (S. cerevisiae)	-0.039424	0.34823	0.52604	-0.28812	-0.48077	-0.42073	-0.61838	-0.23609	-0.19544	-0.94597	-0.57757	-0.76278	0.43822	0.50364	0.62421	0.91918	0.92229	0.055363	0.0072077	-0.0054553	0.56509	0.36121	0.26453
1436678_at	4	Sgcb	sarcoglycan, beta (dystrophin-associated glycoprotein)	0.63826	0.7686	0.66091	0.23132	-0.12423	0.30868	0.23792	0.45569	0.19042	-0.44589	-0.0072875	-0.33761	0.83822	0.46818	0.67297	1.0736	0.80525	-0.31735	-0.12435	-0.32754	0.98456	0.52176	0.51335
1434286_at	4	Trps1	trichorhinophalangeal syndrome I (human)	-0.10514	0.29043	0.58528	-0.23753	-0.49133	-0.22758	-0.72832	-0.23922	-0.19094	-1.05	-0.71986	-0.80485	0.609	0.74788	0.68655	1.0251	1.0779	0.03311	0.1142	0.066137	0.5665	0.49595	0.44679
1417818_at	4	Wwtr1	WW domain containing transcription regulator 1	0.051555	0.56807	0.7554	-0.29416	-0.4596	-0.12038	-0.57444	-0.21111	-0.23798	-0.84315	-0.69263	-0.80328	0.62004	0.76546	0.69988	1.1679	1.1545	0.11758	0.011545	0.022007	0.71806	0.5562	0.31603
1456789_at	4	Zfp462	zinc finger protein 462	0.026816	0.22956	0.38232	-0.40966	-0.33742	-0.23415	-0.34583	0.11588	-0.039814	-0.8946	-0.50184	-0.70975	0.51133	0.27073	0.65063	0.95254	0.9838	-0.13252	-0.16916	-0.2115	0.59299	0.66809	0.52985
1424393_s_at	5	Adhfe1	alcohol dehydrogenase, iron containing, 1	-0.74465	-0.77803	-0.29331	-0.91556	-0.75842	-0.6238	-0.718	-0.81861	-0.58733	-1.1575	-0.8382	-1.3606	-0.51467	-0.51961	-0.40527	-0.42651	-0.59878	-0.53176	-0.47651	-0.26637	-0.052364	-0.01716	-0.053719
1444207_at	5	Alms1	Alstrom syndrome 1 homolog (human)	0.22266	0.41214	-0.096357	0.78692	1.2565	0.6204	0.29678	-0.082623	0.29277	0.31332	0.25286	0.1643	-0.47024	-0.51499	-0.85644	-1.0238	-0.87495	-0.018094	-0.12528	-0.12477	0.14661	-0.19066	0.73387
1438091_a_at	5	Gm6722 /// H2afz	predicted gene 6722 /// H2A histone family, member Z	0.066924	-0.12456	-0.19568	0.43037	0.57664	0.50875	0.41958	0.22526	0.45367	0.61607	0.16467	0.36689	-0.20219	-0.30194	-0.51261	-0.59022	-0.76746	0.014856	-0.24924	-0.21443	0.0065373	-0.16925	0.097501
1418796_at	6	Clec11a	C-type lectin domain family 11, member a	-0.14745	0.18647	0.48193	-0.16995	-0.70241	-0.22038	-0.58161	-0.51971	-0.37507	-0.99149	-0.74582	-0.812	0.59914	0.74025	0.51407	0.81832	0.95631	0.054832	0.13618	0.11403	0.57149	0.42635	0.49049
1423677_at	6	Fkbp9	FK506 binding protein 9	-0.087564	0.24233	0.41362	-0.39096	-0.60741	-0.35239	-0.6753	-0.60237	-0.52222	-1.2607	-0.81426	-0.92965	0.27985	0.61027	0.55502	0.8333	0.94054	0.054217	0.26589	0.0035747	0.43411	0.46941	0.35209
1434360_s_at	6	LOC632664 /// Ptprg	similar to protein tyrosine phosphatase, receptor type, G /// protein tyrosine phosphatase, receptor type, G	0.021631	0.35408	0.51073	-0.28105	-0.36829	-0.1424	-0.40762	-0.28749	-0.40418	-0.892	-0.52348	-0.63179	0.50645	0.32647	0.521	0.93664	0.56578	0.086125	0.19149	0.024601	0.74615	0.47847	0.49036
1438312_s_at	6	Ltbp3	latent transforming growth factor beta binding protein 3	0.31683	0.6627	0.72243	0.37206	-0.14868	0.032486	-0.1083	-0.023412	-0.44879	-0.51161	-0.44878	-0.44352	0.65939	0.52131	0.58061	0.80503	0.64046	0.36067	0.39379	0.05282	0.63547	0.42381	0.4996
1447693_s_at	6	Neo1	neogenin	0.086387	0.11296	0.43673	-0.11015	-0.44488	-0.24172	-0.31786	-0.095894	-0.42753	-0.90178	-0.75222	-0.7356	0.4898	0.20884	0.66514	0.74957	0.83403	0.088632	0.26238	-0.13536	0.778	0.55494	0.39728
1420842_at	6	Ptprf	protein tyrosine phosphatase, receptor type, F	-0.16177	0.19603	0.32648	-0.26368	-0.29786	-0.28506	-0.46733	-0.31755	-0.46128	-0.75256	-0.58054	-0.58359	0.36774	0.30539	0.35243	0.75972	0.54136	0.058288	0.16196	0.05984	0.52549	0.29853	0.37591
1416591_at	6	Rab34	RAB34, member of RAS oncogene family	-0.06003	0.47457	0.70878	-0.12484	-0.35982	-0.21352	-0.44971	-0.40836	-0.44018	-0.87056	-0.59979	-0.79306	0.4614	0.59705	0.57877	0.89205	0.71768	0.20192	0.18929	0.025559	0.61805	0.36564	0.45369
1417644_at	6	Sspn	sarcospan	0.20318	0.26979	0.47553	-0.14323	-0.40565	-0.21844	-0.2497	-0.16193	-0.4676	-0.90905	-0.60922	-0.80734	0.44093	0.46718	0.5798	0.69832	0.74534	0.21767	0.39857	-0.059613	0.83736	0.46565	0.51139
1450922_a_at	6	Tgfb2	transforming growth factor, beta 2	0.081618	0.28396	0.77735	-0.23978	-0.54491	-0.28665	-0.329	-0.011595	-0.32501	-0.77163	-0.5443	-0.62587	0.40486	0.62407	0.60195	0.67429	0.92098	0.10286	0.2805	-0.24001	0.55166	0.24315	0.26916
1417455_at	6	Tgfb3	transforming growth factor, beta 3	0.21951	0.56702	0.53425	-0.16919	-0.46294	0.067956	-0.29302	-0.13863	-0.195	-0.82079	-0.58568	-0.49724	0.2782	0.61628	0.72591	0.8301	1.0608	-0.018275	0.16613	0.15049	0.5676	0.36901	0.41791
1423310_at	6	Tpbg	trophoblast glycoprotein	0.034649	0.39726	0.73072	-0.04962	-0.30026	-0.075525	-0.42745	0.049898	-0.32849	-1.0378	-0.60295	-0.65009	0.60799	0.29705	0.33751	0.61551	0.64434	0.078803	0.25378	-0.10876	0.77031	0.56406	0.6292
1457275_at	7	Synm	synemin, intermediate filament protein	1.0922	0.7704	0.79929	0.43474	0.35288	0.51721	0.79348	1.0585	0.31594	0.069948	0.33717	-0.43547	0.53913	0.39822	0.1319	0.47372	0.42615	-0.59221	-0.45802	-0.37865	0.99388	0.72996	0.56846
1434931_at	8	Neo1	neogenin	-0.058598	0.090667	0.42598	-0.13073	-0.23939	-0.13309	-0.25137	-0.1795	-0.33818	-0.73612	-0.56868	-0.52235	0.25788	0.27	0.52957	0.68643	0.75687	0.17052	0.30042	0.0083008	0.58537	0.2821	0.34828
1437387_at	8	Susd5	sushi domain containing 5	-0.31687	-0.37763	0.15392	-0.67324	-0.73638	-0.55266	-0.67132	-0.34975	-0.40579	-1.5718	-1.1915	-1.1199	0.17945	0.17101	0.40722	0.37724	0.60421	-0.21673	0.078896	-0.42065	0.77668	0.5969	0.56029
1443161_at	9	---	---	-0.069194	0.2909	0.24789	-0.26688	-0.52131	-0.3453	-0.50273	-0.18688	-0.18588	-0.56114	-0.40834	-0.51008	0.56472	0.55783	0.6366	0.94082	0.86774	0.054876	0.039369	0.10518	0.3249	0.14502	0.087103
1456739_x_at	9	Armcx2	armadillo repeat containing, X-linked 2	-0.06211	0.31739	0.49426	-0.23249	-0.66497	-0.35685	-0.51042	-0.22393	-0.11381	-0.74895	-0.35147	-0.66001	0.57102	0.38925	0.54639	0.84541	0.93442	-0.12673	-0.093599	-0.13443	0.19047	0.15436	-0.061755
1429417_at	9	Chsy3	chondroitin sulfate synthase 3	-0.13738	0.19144	0.24372	-0.61675	-0.58556	-0.45499	-0.66039	-0.15349	0.082392	-0.97288	-0.46587	-0.8802	0.78104	0.73191	0.50853	1.1953	1.0199	-0.58806	-0.072151	-0.52223	0.46789	0.44925	0.28174
1423516_a_at	9	Nid2	nidogen 2	-0.44412	0.31383	0.40606	-0.97806	-1.0232	-0.51095	-1.1656	-0.88958	-0.58974	-1.5634	-1.5095	-1.4998	0.62713	0.4995	0.52617	0.94168	1.163	-0.38353	-0.21906	-0.35855	0.49585	0.44226	0.17191
1457445_at	9	Trps1	trichorhinophalangeal syndrome I (human)	-0.17845	0.30474	0.40276	-0.38498	-0.55251	-0.26219	-0.43853	-0.0016477	-0.22509	-0.62075	-0.53079	-0.50332	0.51404	0.57801	0.63191	1.0878	0.97393	0.030052	0.002619	0.092218	0.33577	0.25123	0.095758
1443882_at	11	---	---	-0.41412	-0.34306	0.32452	-0.82232	-1.3068	-0.62668	-0.65056	-0.36035	-0.44834	-0.76786	-0.60152	-0.75966	0.36946	0.076737	0.78251	0.82885	0.95777	-0.10654	0.093358	-0.039918	0.22204	0.25891	-0.19806
1430030_at	11	5330426P16Rik	RIKEN cDNA 5330426P16 gene	-0.17392	0.090135	0.53597	-0.5221	-0.67124	-0.24272	-0.2606	0.19603	0.069869	-0.30711	-0.046914	-0.23171	0.2312	0.27095	0.53533	1.073	0.88264	-0.14254	0.083832	-0.014644	0.20408	0.083119	-0.081317
1439794_at	11	Ntn4	Netrin 4	-0.24321	0.065924	0.42018	-0.64391	-0.9441	-0.27263	-0.48758	0.10806	-0.59603	-0.44122	-0.3829	-0.41834	0.2944	0.30961	0.6371	1.0145	0.79038	0.33885	0.28154	0.10054	0.43734	0.24964	-0.12512
1452770_at	13	Vkorc1	vitamin K epoxide reductase complex, subunit 1	-0.11784	0.16494	0.56332	-0.20764	-0.65231	-0.46638	-0.58309	-0.49029	-0.36419	-0.83783	-0.39967	-0.66037	0.31875	0.43054	0.51689	0.72617	0.74359	0.1397	0.14308	0.062133	0.28601	0.18497	0.04787
1438783_at	14	---	---	0.024035	0.522	0.6067	-0.075894	-0.3642	0.06598	-0.28051	-0.14423	-0.38116	-0.53879	-0.35166	-0.21525	0.56847	0.49017	0.52267	1.0311	0.83113	0.152	0.38729	0.18256	0.5454	0.30306	0.46081
1424051_at	14	Col4a2	collagen, type IV, alpha 2	0.24771	0.81096	0.95462	-0.063262	-0.53961	-0.10627	-0.39372	-0.22284	-0.37534	-0.81085	-0.41969	-0.68256	0.55061	0.52438	0.75544	1.3612	1.1075	-0.051557	0.20266	-0.0076373	0.6992	0.33978	0.29122
1431146_a_at	14	Cpne8	copine VIII	0.13544	0.31257	0.61578	-0.050009	-0.21463	-0.057645	-0.36618	0.012503	-0.079008	-0.67291	-0.54705	-0.41225	0.6846	0.40544	0.50382	0.96895	0.65637	0.075848	0.26986	-0.0096222	0.66892	0.41547	0.40523
1421045_at	14	Mrc2	mannose receptor, C type 2	0.12904	0.73035	0.85948	0.076454	-0.30777	-0.071442	-0.3945	-0.32129	-0.41184	-0.77953	-0.5409	-0.74416	0.59295	0.49769	0.6458	1.1161	0.93574	0.16081	0.19403	-0.075496	0.69571	0.35666	0.38179
1437718_x_at	15	Fmod	fibromodulin	-0.031826	0.50516	0.31925	-0.59224	-0.93177	-0.2349	-0.92873	-0.99375	-0.73771	-1.9408	-1.5818	-1.3325	0.89182	1.2636	1.1136	1.3259	1.6348	0.57088	0.68886	0.58067	1.5201	1.3978	1.4782
1416321_s_at	15	Prelp	proline arginine-rich end leucine-rich repeat	-0.10234	0.1936	0.32197	-0.54598	-0.90659	-0.28203	-0.6606	-0.52341	-0.65043	-1.8342	-1.3186	-0.90413	0.26344	0.84434	0.64471	0.87785	0.95216	0.27909	0.54188	0.3583	1.2053	0.87902	1.1094
1442903_at	20	4732423E21Rik	RIKEN cDNA 4732423E21 gene	-0.2025	0.05069	0.30073	-0.55695	-0.77067	-0.25014	-0.40453	-0.12348	-0.42389	-0.56949	-0.37068	-0.56038	0.42038	0.46408	0.7106	0.98115	0.89319	0.02599	0.051941	0.072958	0.48458	0.26404	-0.062404
1429178_at	22	Odz3	odd Oz/ten-m homolog 3 (Drosophila)	0.064835	0.47637	0.72096	-0.17994	-0.28092	-0.056269	-0.31195	-0.070044	-0.36424	-0.71431	-0.52428	-0.55898	0.62844	0.50743	0.55665	0.97894	1.0206	-0.040568	-0.048175	0.11815	0.31488	0.30863	0.34529
1455901_at	25	Chpt1	choline phosphotransferase 1	-0.41666	-0.30972	-0.028753	-0.84517	-0.87	-0.75759	-0.69115	-0.31129	0.10529	-1.0143	-0.56263	-1.1855	0.14227	0.022771	0.22753	0.52807	0.43572	-1.0238	-0.9012	-0.50736	0.06446	0.093274	-0.14047
1444029_at	26	Parp11	poly (ADP-ribose) polymerase family, member 11	-0.3268	0.086152	0.43099	-0.67117	-0.47999	-0.63633	-0.62228	-0.70368	-0.33387	-0.79558	-0.53463	-0.76499	-0.32633	0.51584	0.59032	0.57402	0.85465	-0.027675	0.19157	0.076552	0.10567	0.19116	0.14631
1417730_at	27	Ext1	exostoses (multiple) 1	-0.086121	0.51382	0.4634	-0.42665	-0.45189	-0.23006	-0.54493	-0.41241	-0.68735	-0.50012	-0.55899	-0.65824	0.66951	0.44365	0.60687	1.0144	0.74256	0.2844	0.29079	0.18583	0.52449	0.30629	0.17201
1456515_s_at	28	Tcfl5	transcription factor-like 5 (basic helix-loop-helix)	-0.20187	0.58451	0.37571	-0.51257	-0.88307	-0.18505	-0.60937	-0.52441	-0.58906	-0.85735	-0.85871	-0.88195	0.68896	0.55187	0.60689	1.0514	0.7072	-0.28827	-0.012087	-0.19762	0.44362	0.30673	0.27333
1451939_a_at	31	Rpgr /// Srpx	retinitis pigmentosa GTPase regulator /// sushi-repeat-containing protein	-0.16872	0.25461	0.4917	-0.39698	-0.69475	-0.314	-0.68408	-0.60658	-0.41209	-1.0528	-0.77494	-0.85578	0.31446	0.55952	0.54995	0.64008	1.1441	0.0077423	0.050805	0.029274	0.44872	0.33672	0.19505
1440026_at	45	---	---	-0.23361	0.19408	0.23388	-0.53918	-0.80531	-0.35109	-0.5317	-0.09989	-0.39043	-0.65618	-0.50939	-0.57096	0.57972	0.60169	0.79857	1.2058	1.0778	0.16501	0.1961	0.21727	0.48735	0.31005	-0.048276
1436915_x_at	47	Laptm4b	lysosomal-associated protein transmembrane 4B	0.086656	0.51087	0.5698	-0.022179	-0.36714	-0.18307	-0.30312	0.079662	0.046447	-0.51126	-0.24136	-0.46325	0.54907	0.58393	0.55442	0.83228	0.76685	-0.24735	-0.23942	-0.14952	0.58259	0.24148	0.084364
1435990_at	49	Adamts2	a disintegrin-like and metallopeptidase (reprolysin type) with thrombospondin type 1 motif, 2	0.36703	0.70666	1.0371	0.17991	-0.22945	-0.086128	-0.43421	-0.18685	-0.3657	-0.87294	-0.61014	-0.81762	0.37431	0.66074	0.80062	0.97984	1.0747	0.37973	0.3875	0.026108	0.86364	0.48022	0.42704
1434740_at	50	Scarf2	scavenger receptor class F, member 2	0.089396	0.63828	0.60712	-0.057544	-0.07109	0.005759	-0.28858	-0.34707	-0.30147	-0.60384	-0.37958	-0.45304	0.34719	0.72354	0.52285	0.58613	0.82901	0.42272	0.24191	0.14977	0.35779	0.37317	0.43929
1431475_a_at	52	Hoxa10	homeo box A10	-0.11228	0.19926	0.39595	-0.41301	-0.65521	-0.25227	-0.75946	-0.29866	-0.31828	-0.98886	-0.62969	-0.95069	0.58683	0.54329	0.59464	0.85493	0.8571	-0.12164	-0.25098	-0.13389	0.30349	0.37987	0.31143
1429280_at	54	Col22a1	collagen, type XXII, alpha 1	-0.018061	0.4004	0.67047	-0.13408	-0.50767	-0.28613	-0.46674	-0.37669	-0.34343	-0.92904	-0.44107	-0.72274	-0.05398	-0.052085	0.83108	0.99257	0.51001	0.12669	0.24725	0.038028	0.56333	0.49187	0.33338
1428914_at	55	2310014D11Rik	RIKEN cDNA 2310014D11 gene	0.0054153	0.19101	0.71682	-0.25275	-0.63267	-0.31893	-0.56088	-0.34318	-0.29999	-0.83579	-0.50721	-0.81232	0.23777	0.37954	0.63483	0.74958	1.0441	0.048525	0.17928	0.078827	0.32519	0.48317	0.26824
1427391_a_at	59	Col12a1	collagen, type XII, alpha 1	-0.2704	0.26268	0.37381	-0.71233	-0.61511	-0.69175	-0.67748	-0.98864	-0.63144	-1.1935	-0.8259	-0.96155	-0.030543	0.84863	0.59314	0.66162	1.0996	-0.10461	0.27811	0.15144	0.24255	0.42984	0.26253
1423915_at	62	Olfml2b	olfactomedin-like 2B	-0.050499	0.31965	0.58605	-0.15598	-0.49602	-0.23977	-0.5075	-0.40078	-0.019571	-0.84611	-0.52044	-0.50166	0.25708	0.50883	0.56887	0.83334	0.77269	0.062399	0.070509	0.12464	0.4174	0.20979	0.092273
1417355_at	65	Peg3	paternally expressed 3	-0.49912	-0.16814	-0.0030722	-1.079	-1.0926	-0.70647	-1.0731	-0.46078	-0.46368	-1.2676	-1.0433	-1.2928	0.25476	0.34976	0.20703	0.56573	0.95951	-0.59439	-0.36263	-0.22226	0.19911	0.099667	-0.19838

## Sheet: DAVID Results
Annotation Cluster 1	Enrichment Score: 6.180881496176386
Category	Term	Count	PValue	Genes
GOTERM_CC_FAT	GO:0031012~extracellular matrix	16	1.03574e-10	FMOD, COL4A2, LTBP3, OLFML2B, NTN4, TGFB3, NID2, TIMP2, COL16A1, MMP14, COL5A1, PRELP, BGN, LEPRE1, COL12A1, ADAMTS2
SP_PIR_KEYWORDS	extracellular matrix	12	5.39205e-09	FMOD, COL4A2, BGN, LEPRE1, NTN4, COL12A1, NID2, TIMP2, COL16A1, ADAMTS2, COL5A1, PRELP
GOTERM_CC_FAT	GO:0005578~proteinaceous extracellular matrix	14	7.78842e-09	FMOD, COL4A2, LTBP3, NTN4, NID2, TIMP2, COL16A1, MMP14, COL5A1, PRELP, BGN, LEPRE1, COL12A1, ADAMTS2
UP_SEQ_FEATURE	signal peptide	34	9.2316e-08	IGDCC4, FKBP9, FMOD, GPR125, LTBP3, TGFB3, NEO1, TIMP2, TGFB2, SCARF2, SRPX, LOC632664, FAT4, COL12A1, COL4A2, RPGR, BMP1, PTPRF, LEPREL2, PTPRG, OLFML2B, MRC2, NTN4, CD276, NID2, MMP14, COL16A1, TPBG, COL5A1, CLEC11A, PRELP, SDC1, LEPRE1, BGN, CDON, ADAMTS2
SP_PIR_KEYWORDS	signal	34	1.50972e-07	IGDCC4, FKBP9, FMOD, GPR125, LTBP3, TGFB3, NEO1, TIMP2, TGFB2, SCARF2, SRPX, LOC632664, FAT4, COL12A1, COL4A2, RPGR, BMP1, PTPRF, LEPREL2, PTPRG, OLFML2B, MRC2, NTN4, CD276, NID2, MMP14, COL16A1, TPBG, COL5A1, CLEC11A, PRELP, SDC1, LEPRE1, BGN, CDON, ADAMTS2
GOTERM_CC_FAT	GO:0044421~extracellular region part	18	3.76378e-07	FMOD, COL4A2, BMP1, LTBP3, OLFML2B, NTN4, TGFB3, NID2, TIMP2, COL16A1, MMP14, COL5A1, TGFB2, PRELP, LEPRE1, BGN, COL12A1, ADAMTS2
SP_PIR_KEYWORDS	disulfide bond	28	2.7878e-06	FMOD, IGDCC4, LTBP3, TGFB3, NEO1, TIMP2, SCARF2, TGFB2, SRPX, FAT4, VKORC1, COL12A1, ODZ3, COL4A2, RPGR, BMP1, PTPRF, OLFML2B, MRC2, CD276, NTN4, NID2, MMP14, CLEC11A, PRELP, BGN, CDON, ADAMTS2, SGCB
UP_SEQ_FEATURE	disulfide bond	27	3.18837e-06	FMOD, IGDCC4, LTBP3, TGFB3, NEO1, TIMP2, SCARF2, TGFB2, SRPX, FAT4, VKORC1, ODZ3, COL4A2, RPGR, BMP1, PTPRF, OLFML2B, MRC2, CD276, NTN4, NID2, MMP14, CLEC11A, PRELP, BGN, CDON, ADAMTS2, SGCB
SP_PIR_KEYWORDS	glycoprotein	35	3.73668e-06	IGDCC4, FKBP9, FMOD, GPR125, LTBP3, TGFB3, NEO1, TGFB2, SCARF2, LOC632664, FAT4, COL12A1, ODZ3, SYNPO, COL4A2, BMP1, PTPRF, LEPREL2, PTPRG, OLFML2B, MRC2, NTN4, CD276, NID2, COL16A1, TPBG, CLEC11A, PRELP, SDC1, LEPRE1, BGN, CHSY3, CDON, EXT1, ADAMTS2, SGCB
UP_SEQ_FEATURE	glycosylation site:N-linked (GlcNAc...)	33	8.46806e-06	IGDCC4, FKBP9, FMOD, GPR125, LTBP3, TGFB3, NEO1, SCARF2, TGFB2, LOC632664, FAT4, COL12A1, ODZ3, COL4A2, BMP1, PTPRF, LEPREL2, PTPRG, OLFML2B, MRC2, NTN4, CD276, NID2, COL16A1, TPBG, PRELP, SDC1, LEPRE1, BGN, CHSY3, CDON, EXT1, ADAMTS2, SGCB
SP_PIR_KEYWORDS	Secreted	17	0.000522563	FMOD, COL4A2, LTBP3, OLFML2B, NTN4, TGFB3, NID2, TIMP2, COL16A1, CLEC11A, COL5A1, TGFB2, PRELP, BGN, LEPRE1, COL12A1, ADAMTS2
GOTERM_CC_FAT	GO:0005576~extracellular region	19	0.00201341	FMOD, COL4A2, BMP1, LTBP3, OLFML2B, NTN4, TGFB3, NID2, TIMP2, COL16A1, MMP14, CLEC11A, COL5A1, TGFB2, PRELP, LEPRE1, BGN, COL12A1, ADAMTS2
Annotation Cluster 2	Enrichment Score: 4.023784495308604
Category	Term	Count	PValue	Genes
SP_PIR_KEYWORDS	extracellular matrix	12	5.39205e-09	FMOD, COL4A2, BGN, LEPRE1, NTN4, COL12A1, NID2, TIMP2, COL16A1, ADAMTS2, COL5A1, PRELP
GOTERM_CC_FAT	GO:0005604~basement membrane	5	0.000718634	COL4A2, NTN4, NID2, TIMP2, COL5A1
GOTERM_CC_FAT	GO:0044420~extracellular matrix part	5	0.00178301	COL4A2, NTN4, NID2, TIMP2, COL5A1
SP_PIR_KEYWORDS	basement membrane	3	0.0116264	COL4A2, NTN4, NID2
Annotation Cluster 3	Enrichment Score: 3.5347668088635
Category	Term	Count	PValue	Genes
GOTERM_BP_FAT	GO:0007155~cell adhesion	12	6.6784e-05	PTPRF, FAT4, CDON, PCDHB17, COL12A1, NEO1, NID2, COL16A1, COL5A1, PARVA, TGFB2, SCARF2
GOTERM_BP_FAT	GO:0022610~biological adhesion	12	6.79424e-05	PTPRF, FAT4, CDON, PCDHB17, COL12A1, NEO1, NID2, COL16A1, COL5A1, PARVA, TGFB2, SCARF2
SP_PIR_KEYWORDS	cell adhesion	9	0.000323981	PTPRF, FAT4, PCDHB17, COL12A1, NEO1, NID2, COL16A1, PARVA, SCARF2
GOTERM_BP_FAT	GO:0016337~cell-cell adhesion	6	0.00493856	PTPRF, FAT4, CDON, PCDHB17, TGFB2, SCARF2
Annotation Cluster 4	Enrichment Score: 2.2171514351603934
Category	Term	Count	PValue	Genes
INTERPRO	IPR008160:Collagen triple helix repeat	5	0.000547646	COL4A2, COL22A1, COL12A1, COL16A1, COL5A1
SP_PIR_KEYWORDS	hydroxylation	4	0.00360496	COL4A2, COL12A1, COL16A1, COL5A1
UP_SEQ_FEATURE	domain:TSP N-terminal	3	0.00385805	COL12A1, COL16A1, COL5A1
INTERPRO	IPR003129:Laminin G, thrombospondin-type, N-terminal	3	0.0043569	COL12A1, COL16A1, COL5A1
SP_PIR_KEYWORDS	collagen	4	0.00709772	COL4A2, COL12A1, COL16A1, COL5A1
SMART	SM00210:TSPN	3	0.00837994	COL12A1, COL16A1, COL5A1
GOTERM_MF_FAT	GO:0005198~structural molecule activity	5	0.15298	COL4A2, COL12A1, SYNM, COL16A1, COL5A1
Annotation Cluster 5	Enrichment Score: 2.043745087196218
Category	Term	Count	PValue	Genes
GOTERM_BP_FAT	GO:0001501~skeletal system development	8	0.000417082	BMP1, LTBP3, TGFB3, HOXA10, MMP14, WWTR1, PAPSS2, TGFB2
GOTERM_BP_FAT	GO:0060348~bone development	4	0.0193317	BMP1, MMP14, WWTR1, PAPSS2
GOTERM_BP_FAT	GO:0001503~ossification	3	0.0916798	BMP1, MMP14, WWTR1
Annotation Cluster 6	Enrichment Score: 1.9429733929179305
Category	Term	Count	PValue	Genes
UP_SEQ_FEATURE	domain:EGF-like 1	5	0.00147487	FAT4, LTBP3, NID2, ODZ3, SCARF2
UP_SEQ_FEATURE	domain:EGF-like 4	4	0.0017837	FAT4, NID2, ODZ3, SCARF2
INTERPRO	IPR000742:EGF-like, type 3	6	0.00230164	BMP1, FAT4, LTBP3, NID2, ODZ3, SCARF2
INTERPRO	IPR013032:EGF-like region, conserved site	7	0.00315002	BMP1, FAT4, LTBP3, NTN4, NID2, ODZ3, SCARF2
SP_PIR_KEYWORDS	egf-like domain	6	0.00405159	BMP1, FAT4, LTBP3, NID2, ODZ3, SCARF2
INTERPRO	IPR013091:EGF calcium-binding	4	0.00466768	BMP1, FAT4, LTBP3, NID2
INTERPRO	IPR001881:EGF-like calcium-binding	4	0.00952429	BMP1, FAT4, LTBP3, NID2
INTERPRO	IPR018097:EGF-like calcium-binding, conserved site	4	0.0104333	BMP1, FAT4, LTBP3, NID2
INTERPRO	IPR000152:EGF-type aspartate/asparagine hydroxylation conserved site	4	0.0104333	BMP1, FAT4, LTBP3, NID2
UP_SEQ_FEATURE	domain:EGF-like 6	3	0.0134695	FAT4, ODZ3, SCARF2
UP_SEQ_FEATURE	domain:EGF-like 5	3	0.0141943	FAT4, ODZ3, SCARF2
INTERPRO	IPR006210:EGF-like	5	0.0165846	FAT4, LTBP3, NID2, ODZ3, SCARF2
SP_PIR_KEYWORDS	calcium	9	0.0191213	FKBP9, BMP1, FAT4, LTBP3, PCDHB17, MRC2, MCC, NID2, MMP14
INTERPRO	IPR006209:EGF	4	0.0222624	BMP1, FAT4, LTBP3, ODZ3
SMART	SM00179:EGF_CA	4	0.0232573	BMP1, FAT4, LTBP3, NID2
UP_SEQ_FEATURE	domain:EGF-like 2; calcium-binding	3	0.0260032	BMP1, FAT4, LTBP3
UP_SEQ_FEATURE	domain:EGF-like 3	3	0.0406029	LTBP3, ODZ3, SCARF2
GOTERM_MF_FAT	GO:0005509~calcium ion binding	9	0.0452354	FKBP9, BMP1, FAT4, LTBP3, PCDHB17, MRC2, MCC, NID2, MMP14
SMART	SM00181:EGF	5	0.0480817	FAT4, LTBP3, NID2, ODZ3, SCARF2
UP_SEQ_FEATURE	domain:EGF-like 2	3	0.0512675	NID2, ODZ3, SCARF2
Annotation Cluster 7	Enrichment Score: 1.8937247148138463
Category	Term	Count	PValue	Genes
INTERPRO	IPR003961:Fibronectin, type III	7	0.000284016	IGDCC4, FLRT2, PTPRF, LOC632664, PTPRG, CDON, COL12A1, NEO1
UP_SEQ_FEATURE	domain:Fibronectin type-III 3	5	0.000385283	IGDCC4, PTPRF, CDON, COL12A1, NEO1
UP_SEQ_FEATURE	domain:Fibronectin type-III 5	4	0.000723586	IGDCC4, PTPRF, COL12A1, NEO1
SMART	SM00060:FN3	7	0.00159325	IGDCC4, FLRT2, PTPRF, LOC632664, PTPRG, CDON, COL12A1, NEO1
INTERPRO	IPR008957:Fibronectin, type III-like fold	6	0.00180841	IGDCC4, PTPRF, LOC632664, PTPRG, CDON, COL12A1, NEO1
UP_SEQ_FEATURE	domain:Fibronectin type-III 4	4	0.00211717	IGDCC4, PTPRF, COL12A1, NEO1
UP_SEQ_FEATURE	domain:Fibronectin type-III 2	5	0.0023085	IGDCC4, PTPRF, CDON, COL12A1, NEO1
UP_SEQ_FEATURE	domain:Fibronectin type-III 1	5	0.00238365	IGDCC4, PTPRF, CDON, COL12A1, NEO1
UP_SEQ_FEATURE	domain:Fibronectin type-III 6	3	0.00664096	PTPRF, COL12A1, NEO1
KEGG_PATHWAY	mmu04514:Cell adhesion molecules (CAMs)	4	0.0191262	SDC1, PTPRF, CD276, NEO1
INTERPRO	IPR013098:Immunoglobulin I-set	4	0.022744	IGDCC4, PTPRF, CDON, NEO1
SP_PIR_KEYWORDS	Immunoglobulin domain	6	0.0293453	IGDCC4, GPR125, PTPRF, CDON, CD276, NEO1
INTERPRO	IPR003599:Immunoglobulin subtype	5	0.0347686	IGDCC4, GPR125, PTPRF, CDON, CD276
INTERPRO	IPR007110:Immunoglobulin-like	6	0.0430998	IGDCC4, GPR125, PTPRF, CDON, CD276, NEO1
INTERPRO	IPR003598:Immunoglobulin subtype 2	4	0.0554893	IGDCC4, PTPRF, CDON, NEO1
INTERPRO	IPR013783:Immunoglobulin-like fold	6	0.0565199	IGDCC4, GPR125, PTPRF, CDON, CD276, NEO1
UP_SEQ_FEATURE	domain:Ig-like C2-type 3	3	0.0614892	PTPRF, CDON, NEO1
SMART	SM00409:IG	5	0.094021	IGDCC4, GPR125, PTPRF, CDON, CD276
SMART	SM00408:IGc2	4	0.121009	IGDCC4, PTPRF, CDON, NEO1
UP_SEQ_FEATURE	domain:Ig-like C2-type 1	3	0.124092	PTPRF, CDON, NEO1
UP_SEQ_FEATURE	domain:Ig-like C2-type 2	3	0.125726	PTPRF, CDON, NEO1
INTERPRO	IPR013151:Immunoglobulin	3	0.188446	IGDCC4, CDON, NEO1
Annotation Cluster 8	Enrichment Score: 1.642449620287726
Category	Term	Count	PValue	Genes
INTERPRO	IPR000372:Leucine-rich repeat, cysteine-rich flanking region, N-terminal	5	0.000992837	FMOD, FLRT2, BGN, TPBG, PRELP
INTERPRO	IPR001611:Leucine-rich repeat	6	0.00219596	FMOD, FLRT2, BGN, GPR125, TPBG, PRELP
INTERPRO	IPR003591:Leucine-rich repeat, typical subtype	5	0.00297606	FMOD, FLRT2, BGN, GPR125, TPBG
SMART	SM00013:LRRNT	5	0.00334856	FMOD, FLRT2, BGN, TPBG, PRELP
UP_SEQ_FEATURE	compositionally biased region:Cys-rich	5	0.00351929	FMOD, BGN, LTBP3, ADAMTS2, PRELP
SP_PIR_KEYWORDS	leucine-rich repeat	6	0.00858912	FMOD, FLRT2, BGN, GPR125, TPBG, PRELP
SMART	SM00369:LRR_TYP	5	0.00960636	FMOD, FLRT2, BGN, GPR125, TPBG
UP_SEQ_FEATURE	repeat:LRR 4	5	0.0182932	FMOD, BGN, GPR125, TPBG, PRELP
UP_SEQ_FEATURE	repeat:LRR 3	5	0.0254632	FMOD, BGN, GPR125, TPBG, PRELP
UP_SEQ_FEATURE	repeat:LRR 1	5	0.0324346	FMOD, BGN, GPR125, TPBG, PRELP
UP_SEQ_FEATURE	repeat:LRR 2	5	0.0324346	FMOD, BGN, GPR125, TPBG, PRELP
UP_SEQ_FEATURE	repeat:LRR 12	3	0.0500373	FMOD, BGN, PRELP
UP_SEQ_FEATURE	repeat:LRR 6	4	0.0504587	FMOD, BGN, TPBG, PRELP
UP_SEQ_FEATURE	repeat:LRR 11	3	0.0601757	FMOD, BGN, PRELP
INTERPRO	IPR000483:Cysteine-rich flanking region, C-terminal	3	0.0612365	FLRT2, GPR125, TPBG
UP_SEQ_FEATURE	repeat:LRR 5	4	0.0643946	FMOD, BGN, TPBG, PRELP
UP_SEQ_FEATURE	repeat:LRR 10	3	0.0779815	FMOD, BGN, PRELP
UP_SEQ_FEATURE	repeat:LRR 9	3	0.104927	FMOD, BGN, PRELP
SMART	SM00082:LRRCT	3	0.109303	FLRT2, GPR125, TPBG
UP_SEQ_FEATURE	repeat:LRR 8	3	0.12084	FMOD, BGN, PRELP
UP_SEQ_FEATURE	repeat:LRR 7	3	0.161117	FMOD, BGN, PRELP
Annotation Cluster 9	Enrichment Score: 1.3935179954876578
Category	Term	Count	PValue	Genes
INTERPRO	IPR000886:Endoplasmic reticulum, targeting sequence	3	0.0184045	FKBP9, LEPRE1, LEPREL2
UP_SEQ_FEATURE	short sequence motif:Prevents secretion from ER	3	0.0329812	FKBP9, LEPRE1, LEPREL2
SP_PIR_KEYWORDS	endoplasmic reticulum	7	0.108707	SEC16B, FKBP9, LEPRE1, LEPREL2, GPSM1, VKORC1, EXT1
Annotation Cluster 10	Enrichment Score: 1.3200811821550773
Category	Term	Count	PValue	Genes
GOTERM_BP_FAT	GO:0001501~skeletal system development	8	0.000417082	BMP1, LTBP3, TGFB3, HOXA10, MMP14, WWTR1, PAPSS2, TGFB2
GOTERM_BP_FAT	GO:0007178~transmembrane receptor protein serine/threonine kinase signaling pathway	3	0.0563165	LTBP3, TGFB3, TGFB2
GOTERM_BP_FAT	GO:0007167~enzyme linked receptor protein signaling pathway	3	0.401186	LTBP3, TGFB3, TGFB2
GOTERM_BP_FAT	GO:0007166~cell surface receptor linked signal transduction	7	0.556508	SDC1, GPR125, LTBP3, CDON, TGFB3, ADAMTS2, TGFB2
